# Supplementary material for: Homer1 promotes dendritic spine growth through ankyrin-G and its loss reshapes the synaptic proteome
Source: Mol Psychiatry. 2021 Jan 4;26(6):1775–89. doi: 10.1038/s41380-020-00991-1 (PMC8254828; doi:10.1038/s41380-020-00991-1)
Supplement: Supplementary file 4 — Supplementary table 2 [file 41380_2020_991_MOESM4_ESM.pdf]

| Gene Name | Accession | Spec Count | Peptide Num | Norm Int  | WT        | WT       | WT        | WT        | WT        | KO        | KO        | KO         | KO         | KO          | KO        | t-test      | T-test p value (-log <sub>10</sub> ) | Mean        | Mean      | Fold Change KO/WT (log <sub>2</sub> ) | Description                                                                                      |                                                                                                                 |                                                                                              |
|-----------|-----------|------------|-------------|-----------|-----------|----------|-----------|-----------|-----------|-----------|-----------|------------|------------|-------------|-----------|-------------|--------------------------------------|-------------|-----------|---------------------------------------|--------------------------------------------------------------------------------------------------|-----------------------------------------------------------------------------------------------------------------|----------------------------------------------------------------------------------------------|
| UBRD      | P70887    | 3          | 3           | 517.67    | 1364      | 1391.33  | 1393.67   | 1457.33   | 1494.27   | 4444      | 5502.87   | 4840       | NA         | NA          | NA        | 0.00024593  | 3.648604477                          | 790         | 4932.335  | Up                                    | 1.46231120219963                                                                                 | Urophosphorylating decarboxylase OS=Mus musculus GN=Lroaf Pe1 Sv-2                                              |                                                                                              |
| SEPR      | Q04949    | 15         | 15          | 75427.27  | 80498.7   | 80324.8  | 82542.33  | 89369.07  | 91623.87  | 91623.87  | 92881.47  | 9058.73    | NA         | NA          | NA        | 0.00026956  | 3.58105923                           | 2           | 8944.03   | Up                                    | 1.17046802346855                                                                                 | Seprin-8 OS=Mus musculus GN=Sepr8 Pe1 Sv-1                                                                      |                                                                                              |
| SIRPA     | P97797-3  | 4          | 4           | 11546.5   | 15066.75  | 19307    | 17066.75  | 17060.25  | 26488.25  | 31471.75  | 28490.5   | 25040      | NA         | NA          | NA        | 0.017852523 | 16010.05                             | 36691.05    | Up        | 0.73737284736596                      | isoform 3 of Tyrosine-protein phosphatase non-receptor type substrate 1 OS=Mus musculus GN=Sirpa |                                                                                                                 |                                                                                              |
| CSMK1E    | Q9IMK2    | 5          | 5           | 14625.8   | 17282.4   | 14478.2  | 17797.6   | 20288.8   | 25043.2   | 24109.2   | NA        | 27246.8    | NA         | NA          | NA        | 0.00108909  | 2.959040577                          | 16894.56    | 25664.4   | Up                                    | 0.59203625101068                                                                                 | Casikin kinase 1 isoform epsilon OS=Mus musculus GN=Csmk1e Pe1 Sv-2                                             |                                                                                              |
| SNZ17     | Q8R6J3    | 3          | 3           | 16517.67  | 7445.33   | 5673.33  | 8408      | 7200      | 10043     | 9670.33   | NA        | 10475.67   | NA         | NA          | NA        | 0.001049049 | 2.885386339                          | 7013.466    | 12065.1   | Up                                    | 0.5211472688446                                                                                  | Serpin rexin-17 OS=Mus musculus GN=Snz17 Pe1 Sv-2                                                               |                                                                                              |
| SNZ18     | Q8R6J4    | 3          | 3           | 13915.5   | 4920.25   | 2488.25  | 4278.2    | 5683.25   | 6418.25   | 6418.25   | NA        | 5884.25    | NA         | NA          | NA        | 0.001049049 | 2.885386339                          | 3932        | 5131.2    | Up                                    | 0.421923511516807                                                                                | isoform 2 of SNZ18 isoform 2 OS=Mus musculus GN=Snz18                                                           |                                                                                              |
| IC41      | Q8R6J5    | 1          | 1           | 10509     | 9051      | 11539    | 13501     | 20789     | 37115     | 27797     | 37212     | 44206      | NA         | NA          | NA        | 0.002991186 | 1.524516536                          | 16207.8     | 36995.2   | Up                                    | 1.1744653045656                                                                                  | let-401 autophagy-1 OS=Mus musculus GN=Ic41 Pe1 Sv-1                                                            |                                                                                              |
| EDC3      | Q8R6J0    | 1          | 1           | 810       | 985       | NA       | 2609      | 1950      | 4510      | 4089      | NA        | NA         | NA         | NA          | NA        | 0.027452482 | 2.323079499                          | 1588.5      | 42995.5   | Up                                    | 1.43653080477205                                                                                 | Enhancer of mRNA-decapping protein 3 OS=Mus musculus GN=Edc3 Pe1 Sv-1                                           |                                                                                              |
| NED1      | P77098-3  | 10         | 10          | 18891.1   | 29849.5   | 28420.4  | 28459.5   | 29020     | 32469.3   | 40970.1   | 40986.7   | 49470.4    | 50289.1    | NA          | NA        | 0.00442999  | 2.11613461                           | 26911.72    | 42837.12  | Up                                    | 0.6706288850246                                                                                  | isoform 2 of Neogenin OS=Mus musculus GN=Ned1                                                                   |                                                                                              |
| PLK2A     | Q7R676    | 1          | 1           | 1457      | 1469      | 235      | NA        | 9010      | 9144      | NA        | 9061      | NA         | NA         | NA          | NA        | 0.005181212 | 2.385168633                          | 4648.9      | 9071.6607 | Up                                    | 0.93341763173863                                                                                 | Phosphatidylinositol 4-kinase type 2-alpha OS=Mus musculus GN=Plk2a Pe1 Sv-1                                    |                                                                                              |
| MPPI      | P77098-2  | 2          | 2           | 35113     | 38645.5   | 36243.5  | 35935.5   | 39337.5   | 41325.5   | 43314     | 44952.5   | 49330      | 43187.5    | NA          | NA        | 0.005674816 | 2.246048273                          | 37095       | 44062.1   | Up                                    | 0.24831351084295                                                                                 | 55 kDa erythrocyte membrane protein OS=Mus musculus GN=Mppi Pe1 Sv-1                                            |                                                                                              |
| PLPBP3    | Q7R780    | 12         | 12          | 19754.08  | 27167.42  | 22944.17 | 36071.75  | 37822.83  | 41890.75  | 38569.67  | 35248.5   | 40385.17   | NA         | NA          | NA        | 0.007207917 | 2.142190233                          | 25094.918   | 38783.864 | Up                                    | 0.539955641561002                                                                                | lipid phosphate phosphatase-related protein type 3 OS=Mus musculus GN=PlpBP3 Pe2 Sv-1                           |                                                                                              |
| KCNIP4    | Q6PZ98    | 3          | 3           | 3759      | 5698      | NA       | 3009      | 3010      | 4585      | 5220      | NA        | 5434       | NA         | NA          | NA        | 0.008102188 | 2.091397688                          | 2869        | 5080.738  | Up                                    | 0.82637650420122                                                                                 | cyt channel-interacting protein 4 OS=Mus musculus GN=Kcnip4 Pe1 Sv-1                                            |                                                                                              |
| KCNQ1     | Q8R6J1    | 1          | 1           | 3708      | 16007     | NA       | 6561      | 3973      | 8906      | 6085      | NA        | NA         | NA         | NA          | NA        | 0.008144202 | 2.088986112                          | 4687.25     | 81473.5   | Up                                    | 0.90012941256664                                                                                 | Membrane voltage-gated potassium channel subunit 1 OS=Mus musculus GN=Kcnq1 Pe1 Sv-1                            |                                                                                              |
| NECAB1    | Q6PZ99    | 1          | 1           | 3121      | 6822      | 3627     | 7398      | 6406      | 16952     | 8434      | NA        | 10854      | NA         | NA          | NA        | 0.009534466 | 2.028951131                          | 5474.8      | 9993.333  | Up                                    | 0.868197144889478                                                                                | N-terminal EF-hand calcium-binding protein 1 OS=Mus musculus GN=NeCab1 Pe1 Sv-1                                 |                                                                                              |
| BRSK2     | Q6PZ98    | 3          | 3           | 35386.67  | 37907.33  | 30246.67 | 50463.67  | 53025     | 58898     | 69298     | 63834.67  | 5716.67    | NA         | NA          | NA        | 0.009750717 | 1.92051048                           | 43417.868   | 62461.833 | Up                                    | 0.52468608092805                                                                                 | Serine/threonine-protein kinase BRSK2 OS=Mus musculus GN=Brsk2 Pe1 Sv-2                                         |                                                                                              |
| NEFL      | P08551    | 68         | 68          | 88875.59  | 106017.49 | 95295.29 | 73736.84  | 88865.94  | 77985.59  | 69622.99  | 67591.53  | 63851.51   | 42102.6    | NA          | NA        | 0.010180514 | 1.992230306                          | 91250.23    | 64998.844 | Down                                  | -0.489414135120942                                                                               | Neurofilament light polypeptide OS=Mus musculus GN=Neffl Pe1 Sv-1                                               |                                                                                              |
| COMT2     | Q6P807    | 1          | 1           | 25652     | 332138    | 249498   | 554007    | 221003    | 191288    | 175625    | 51041     | 143884     | NA         | NA          | NA        | 0.010244647 | 1.977799902                          | 281619.8    | 143484.8  | Down                                  | -0.97561728151472                                                                                | Catechol-O-methyltransferase 2 OS=Mus musculus GN=Comt2 Pe1 Sv-1                                                |                                                                                              |
| CADPS2    | Q8R6J2    | 23         | 23          | 15461.2   | 67686.6   | 20762.63 | 78567.63  | 67655.6   | 81982.13  | 81894.13  | 96445.87  | 76575.73   | 85984.67   | NA          | NA        | 0.010714104 | 1.700044156                          | 68011.252   | 84578.508 | Up                                    | 0.31448351118979                                                                                 | T-complex protein 1 subunit delta OS=Mus musculus GN=Cadps2 Pe1 Sv-1                                            |                                                                                              |
| PCLO      | Q9OY07    | 112        | 112         | 27288.54  | 27696.85  | 26993.70 | 31662.31  | 33810.5   | 35233.64  | 36155.1   | 31620.17  | 40083.21   | 35418.01   | 0.012091141 | NA        | 1.915732271 | 29490.398                            | 35702.028   | Up        | 0.275760562859781                     | Protein piccolo OS=Mus musculus GN=Pclop Pe1 Sv-4                                                |                                                                                                                 |                                                                                              |
| POLIMS    | Q8R6J5    | 1          | 2           | 16867.5   | 18392     | 15851    | 17642     | 20020     | 20212.5   | 21390     | 29076     | 26743      | 27936      | NA          | NA        | 0.012179033 | 1.9143872                            | 17763       | 25053.1   | Up                                    | 0.49612538647247                                                                                 | PDZ and LIM domain protein 5 OS=Mus musculus GN=Polims Pe1 Sv-1                                                 |                                                                                              |
| CAAD      | P71792    | 14         | 14          | 6818.36   | 12762     | 10800.07 | 16324.29  | 10172.17  | 14071.36  | 20296.57  | 18382.93  | 17130.21   | 18489.07   | NA          | NA        | 0.012269576 | 1.91170495                           | 11375.486   | 19704.028 | Up                                    | 0.63570291292211                                                                                 | Concavosynin and adenomycin receptor OS=Mus musculus GN=Caad Pe1 Sv-1                                           |                                                                                              |
| TOM2      | Q9OY05    | 1          | 1           | 16091     | 18081     | 18354    | 29504     | 22746     | 34134     | 31591     | 25036     | 36136      | NA         | NA          | NA        | 0.014435966 | 1.974185509                          | 20950       | 30713.1   | Up                                    | 0.55120137902902                                                                                 | Tomosin-2 OS=Mus musculus GN=Tom2 Pe2 Sv-1                                                                      |                                                                                              |
| SYT13     | Q9OY05    | 1          | 1           | 21045     | 26219     | 28528    | 27102     | 26763     | 34139     | 30277     | 35555     | 30354      | 28082      | 0.01489995  | NA        | 1.826816786 | 25935                                | 31721.1     | Up        | 0.29055067500051                      | Synaptotagmin-13 OS=Mus musculus GN=Sytn13 Pe1 Sv-1                                              |                                                                                                                 |                                                                                              |
| CLIF      | Q6P049    | 1          | 1           | 14057     | 14754     | 7001     | 16433     | 18901     | 18999     | 18295     | NA        | 18144      | 21831      | NA          | NA        | 0.01496045  | 1.820550342                          | 13155.2     | 13030     | Up                                    | 0.553134137152645                                                                                | Catecholyl acetylcholinesterase B protein homolog OS=Mus musculus GN=Clif Pe1 Sv-1                              |                                                                                              |
| RAB18     | Q9OJG1    | 2          | 2           | 26429.5   | 17915.5   | 29408.5  | 45457.5   | 37217     | 44615.5   | 51493.5   | 43982     | 47036.5    | NA         | NA          | NA        | 0.01537447  | 1.81076387                           | 32598.8     | 48900.4   | Up                                    | 0.470108871300677                                                                                | Rab-related protein Rab-18 OS=Mus musculus GN=Rab18 Pe1 Sv-1                                                    |                                                                                              |
| CA4BP3    | Q8R6J2    | 23         | 23          | 13180.5   | 16132.75  | 14101.25 | 18401.25  | 18787.27  | 23951.27  | 28556.25  | 24902.25  | 34568.25   | NA         | NA          | NA        | 0.015714104 | 1.791179125                          | 16817.25    | 24072     | Up                                    | 0.4922230233837                                                                                  | isoform 2 of Calcium-binding protein 3 OS=Mus musculus GN=Ca4bp3 Pe1 Sv-1                                       |                                                                                              |
| ECST      | Q9OYH6    | 1          | 1           | 35678     | 18189     | 30317    | 54132     | 32443     | 65851     | 46843     | 54921     | 60480      | NA         | NA          | NA        | 0.015305392 | 1.815155531                          | 34151.8     | 57021.75  | Up                                    | 0.73860128009352                                                                                 | Evolutionarily conserved signaling intermediate in Toll pathway, mitochondrial OS=Mus musculus GN=Ecst Pe1 Sv-1 |                                                                                              |
| ARTN      | Q9OJG1    | 1          | 1           | 22988     | 23929     | 28275    | 18094     | 33232     | 18901     | 39671     | 54782     | 101399     | NA         | NA          | NA        | 0.01671293  | 1.79613293                           | 25303.6     | 46591.6   | Up                                    | 0.8807721983576                                                                                  | Artemin OS=Mus musculus GN=Artin Pe1 Sv-1                                                                       |                                                                                              |
| PDHX      | Q8R6J2    | 21         | 21          | 63450.24  | 64244.57  | 58720.9  | 55594.86  | 61160.43  | 64471     | 63770.38  | 67284.14  | 69390      | 72975.29   | NA          | NA        | 0.01706525  | 1.767858906                          | 60034.2     | 67578.162 | Up                                    | 0.156425341525205                                                                                | Purkinje dendrodendritic protein X component, mitochondrial OS=Mus musculus GN=Pdhx Pe1 Sv-1                    |                                                                                              |
| HRNDP     | Q8R6J2    | 21         | 21          | 152029.19 | 110406.36 | 122448   | 124042.36 | 126989.04 | 126989.04 | 126989.04 | 126989.04 | 126989.04  | 126989.04  | 126989.04   | 126989.04 | 126989.04   | 0.01706525                           | 1.767858906 | 60034.2   | 67578.162                             | Up                                                                                               | 0.156425341525205                                                                                               | Purkinje dendrodendritic protein X component, mitochondrial OS=Mus musculus GN=Pdhx Pe1 Sv-1 |
| CAMPSAP3  | Q9OYH6    | 20         | 20          | 36150.88  | 38825.76  | 21091.12 | 60795.12  | 21550.59  | 27335.59  | 29894.47  | 40704.24  | 0.01755438 | NA         | NA          | NA        | 0.01755438  | 1.86955455                           | 18695.84    | 30469.848 | Up                                    | 0.706800593161447                                                                                | isoform 2 of Calmodulin-regulated spectrin-associated protein 3 OS=Mus musculus GN=Campsap3                     |                                                                                              |
| CD200     | Q5A901    | 8          | 8           | 40753.88  | 93666.25  | 71721.12 | 64796.62  | 53562.75  | 71858.62  | 90474.25  | 90035.88  | 76115.62   | 74829.38   | NA          | NA        | 0.017733382 | 1.751208442                          | 57200.124   | 80462.75  | Up                                    | 0.488729315665624                                                                                | OX-2 membrane glycoprotein OS=Mus musculus GN=CD200 Pe1 Sv-1                                                    |                                                                                              |
| BRD3      | Q8R6J0    | 1          | 1           | 3113      | 5655      | NA       | 2964      | 2544      | 4589      | 3964      | NA        | 5487       | NA         | NA          | NA        | 0.01882445  | 1.751208442                          | 2569        | 4679      | Up                                    | 0.8649933845984                                                                                  | Bromodomain-containing protein 3 OS=Mus musculus GN=Brd3 Pe1 Sv-2                                               |                                                                                              |
| GNAT1     | Q8R6J5    | 5          | 5           | 2861.5    | 38606.5   | NA       | 41661     | 42951     | 50431     | 54170     | 42653     | 54812      | NA         | NA          | NA        | 0.01882445  | 1.751208442                          | 2569        | 4679      | Up                                    | 0.8649933845984                                                                                  | isoform 2 of Neogenin OS=Mus musculus GN=GNAT1 Pe1 Sv-1                                                         |                                                                                              |
| ZNF405    | Q8R6J5    | 1          | 1           | 2629      | 4029      | 7446     | 9236      | 7160      | 11007     | 10204     | 15570     | 18427      | NA         | NA          | NA        | 0.01883813  | 1.724968078                          | 6098        | 13802     | Up                                    | 1.17486928263124                                                                                 | AN1-type zinc finger protein 5 OS=Mus musculus GN=Znf405 Pe1 Sv-1                                               |                                                                                              |
| GNAT1     | P21278    | 2          | 2           | 44682     | 63433.5   | 67961    | 60077.5   | 62363.5   | 66673.5   | 81352     | 105112.5  | 78002.5    | 84176      | 0.019316006 | NA        | 1.714062439 | 60285.5                              | 13802       | 13802     | Up                                    | 0.46275086166005                                                                                 | Guanine nucleotide-binding protein subunit alpha-1 OS=Mus musculus GN=GNAT1 Pe1 Sv-1                            |                                                                                              |
| GNAT1     | P30677    | 2          | 2           | 35131.33  | 48134.33  | 45307.33 | 52869.33  | 47057.67  | 51426     | 58802.67  | 70075     | 54576.67   | 56117.33   | 0.019413391 | NA        | 1.714062439 | 60285.5                              | 13802       | 13802     | Up                                    | 0.46275086166005                                                                                 | Guanine nucleotide-binding protein subunit alpha-1 OS=Mus musculus GN=GNAT1 Pe1 Sv-1                            |                                                                                              |
| KLTA      | P31373    | 2          | 2           | 47147.5   | 57001     | 37944    | 67387.5   | 79284     | 87421     | 95134     | NA        | 76478      | NA         | NA          | NA        | 0.020131571 | 1.686122339                          | 58339.538   | 74278.478 | Up                                    | 0.60459412408848                                                                                 | Keratin-like protein KLTA OS=Mus musculus GN=Klta Pe1 Sv-1                                                      |                                                                                              |
| PLS1      | P21414    | 1          | 1           | 29414     | 39294     | 13871    | 46570     | 43230     | 86118     | 62048     | 93801     | NA         | NA         | NA          | NA        | 0.02048461  | 1.60249458                           | 17411.8     | 80648.634 | Up                                    | 1.11779452135648                                                                                 | Proteoglycan fusion-1 protein OS=Mus musculus GN=Pls1 Pe1 Sv-1                                                  |                                                                                              |
| CLVS1     | Q9OYH6    | 1          | 1           | 6959      | 8896      | 4200     | 14973     | 9913      | 13064     | 14604     | 16378     | 17083      | NA         | NA          | NA        | 0.020626062 | 1.681174048                          | 8988.2      | 15282.25  | Up                                    | 0.76575284500692                                                                                 | isoform 2 of Clavesin-1 OS=Mus musculus GN=Clvs1                                                                |                                                                                              |
| HEPACAM   | Q6A083    | 3          | 3           | 16936     | 17521.67  | 15846.33 | 18962.67  | 15585     | 19251.67  | 21596     | 25988.67  | 19110.67   | 20791.67   | NA          | NA        | 0.020880262 | 1.680264066                          | 16070.734   | 21437.738 | Up                                    | 0.33103411113346                                                                                 | Hepatocyte cell adhesion molecule OS=Mus musculus GN=Hepacam Pe1 Sv-2                                           |                                                                                              |
| STUB1     | Q9OJG1    | 14         | 14          | 34854.09  | 7708.69   | 43422.68 | 26077.38  | 37275.92  | 40938.15  | 40203.15  | 55823.54  | 55341      | 49396.15   | NA          | NA        | 0.021306942 | 1.671497213                          | 35744.86    | 48498.99  | Up                                    | 0.435738949394802                                                                                | STIP1 homolog and 1-box-containing protein 1 OS=Mus musculus GN=Stub1 Pe1 Sv-1                                  |                                                                                              |
| SHANK3    | Q4ACU2-6  | 6          | 6           | 29860.5   | 34081.67  | 38543.83 | 29101.17  | 35148.33  | 22827.67  | 23943     | 15053.33  | 28779.33   | NA         | NA          | NA        | 0.022234512 | 1.650080755                          | 32033.3     | 22651.373 | Down                                  | -0.7091477563609                                                                                 | isoform 2 of SHANK3 and multiple antigen repeat domains protein 3 OS=Mus musculus GN=Shank3                     |                                                                                              |
| PRNT3     | Q6P113    | 6          | 6           | 19985.67  | 30935     | 31003.67 | 40895.17  | 47866.5   | 47423.83  | 41971.17  | 40512.83  | 35714.17   | 0.02259932 | NA          | NA        | 1.664471677 | 30407.702                            | 42837.7     | Up        | 0.46229729978                         | Proline-rich transmembrane protein 3 OS=Mus musculus GN=Prnt3 Pe1 Sv-1                           |                                                                                                                 |                                                                                              |
| ADGRB1    | Q3UJ01    | 5          | 5           | 12022.2   | 22393.8   | 21083.6  | 13264.4   | 25675.8   | 27574.4   |           |           |            |            |             |           |             |                                      |             |           |                                       |                                                                                                  |                                                                                                                 |                                                                                              |

|              |          |    |    |           |           |           |           |           |           |           |           |             |           |             |             |           |           |                  |                                                                            |                                                                                                                 |                                                                                |
|--------------|----------|----|----|-----------|-----------|-----------|-----------|-----------|-----------|-----------|-----------|-------------|-----------|-------------|-------------|-----------|-----------|------------------|----------------------------------------------------------------------------|-----------------------------------------------------------------------------------------------------------------|--------------------------------------------------------------------------------|
| PCDH2L2      | Q3U5I8-3 | 1  | 1  | 7366      | 6990      | 3816      | 11163     | 10216     | 14202     | 14136     | 9066      | 14210       | NA        | 0.047317197 | 1.324485642 | 7904.2    | 12284.8   | Up               | 0.62955690572498                                                           | isoform 3 of FCH and double SH3 domains protein 2 OS=Mus musculus GN-Fchs2                                      |                                                                                |
| FARPL1       | FRVU12   | 1  | 1  | 11853     | 19297     | 10878     | 29448     | 22283     | 30233     | 24964     | NA        | 30288       | NA        | 0.048091499 | 1.312726765 | 18751.8   | 22828.5   | Up               | 0.603626927434514                                                          | FERM, RhoGEF and plectrin domain-containing protein 1 OS=Mus musculus GN-Farp1 PE-1 Sv-1                        |                                                                                |
| CHMP6        | PC6A3-1  | 2  | 1  | 6174      | 5147      | 5011      | 7999      | 6817      | 9472      | 7665      | 7622      | 8270        | NA        | 0.048448927 | 1.31478904  | 6223.8    | 7751.25   | Up               | 0.316591047551083                                                          | Charged multivesicular body protein 6 OS=Mus musculus GN-Chmp6 PE-2 Sv-2                                        |                                                                                |
| PCDH4        | CH8889   | 1  | 1  | 14366     | 23643     | NA        | 31432     | 23080     | 34249     | 36444     | NA        | 30599       | NA        | 0.048740836 | 1.312110703 | 93316.6   | 33764.5   | Up               | 0.54570570212939                                                           | Protocadherin alpha-4 OS=Mus musculus GN-Pcdh4 PE-1 Sv-1                                                        |                                                                                |
| PCDH4        | Q0N1M6   | 3  | 3  | 92684     | 333       | 95938     | 111727    | 111626    | 85965     | 108442    | 33        | 14677       | 155930    | 1           | 130766      | 104692666 | 12437.53  | 13437.53         | Up                                                                         | 0.31579007766672                                                                                                | Actin-related protein 2/3 complex subunit 3 OS=Mus musculus GN-Arcp3 PE-1 Sv-3 |
| MAGI1        | Q6V8V9   | 2  | 2  | 41817.5   | 14500.5   | 9602.5    | 16551.5   | 18188     | 21567.5   | 20198.5   | 16753     | 27918       | NA        | 0.049432466 | 1.305988606 | 14597.2   | 21609.25  | Up               | 0.565957339601352                                                          | Membrane-associated guanylate kinase, WW and PDZ domain-containing protein 1 OS=Mus musculus GN-Magi1 PE-1 Sv-1 |                                                                                |
| QSOX2        | Q6V8D8   | 2  | 2  | 12039.5   | 65709.7   | 6264.9    | 14363.7   | 54038.7   | 61407.7   | 92359.57  | 68466.5   | 88971.57    | NA        | 0.05012408  | 1.305988606 | 14597.2   | 21609.25  | Up               | 0.565957339601352                                                          | Transferrin protein 3 OS=Mus musculus GN-Trp3 PE-1 Sv-1                                                         |                                                                                |
| 212035C23RK  | Q14H7-3  | 1  | 1  | 21417     | 41237     | 47474     | 41351     | 41361     | 44839     | 99072     | NA        | 34464       | NA        | 0.050274828 | 1.294572312 | 23953.28  | 34464     | Up               | 0.720196644150899                                                          | isoform 1 of L14 domain and HEAT repeat protein KIAA1468 OS=Mus musculus GN-Kiaa1468                            |                                                                                |
| DDGKG1       | Q80WV9   | 1  | 1  | 3658      | 10773     | NA        | 12903     | 10895     | 17237     | 15590     | NA        | 14080       | NA        | 0.050585599 | 1.293658155 | 9557.25   | 15638.667 | Up               | 0.71040550368058                                                           | cytochrome c domain-containing protein 1 OS=Mus musculus GN-Cdrak1 PE-1 Sv-2                                    |                                                                                |
| PF20N1       | Q720N1   | 4  | 4  | 48187.5   | 52115.75  | 43620.25  | 46150     | 45023     | 57438.5   | 59107.25  | 47004     | 77282.75    | 60947     | 0.051118485 | 1.291422025 | 47019.35  | 60465.9   | Up               | 0.362867162578135                                                          | Prefoldin subunit 2 OS=Mus musculus GN-Pf2n2 PE-2 Sv-2                                                          |                                                                                |
| HBSL1        | Q6W5Z7   | 1  | 1  | 11099     | 14222     | 6578      | 14204     | 11197     | 14749     | 16347     | NA        | 14801       | NA        | 0.051200808 | 1.290724272 | 11487     | 15299     | Up               | 0.414183290020987                                                          | HBSL-like protein OS=Mus musculus GN-Hbsl1 PE-1 Sv-2                                                            |                                                                                |
| ITOP         | Q103I8   | 3  | 3  | 4560      | 4421.67   | 2673.33   | 5543.67   | 4784.33   | 5463.67   | 5703.33   | NA        | 5490.67     | NA        | 0.052016147 | 1.283860987 | 4299.4    | 5590.89   | Up               | 0.368531745372572                                                          | Tetratricopeptide repeat protein 3A OS=Mus musculus GN-Trp3 PE-2 Sv-1                                           |                                                                                |
| PSD          | Q5D7T2-2 | 3  | 3  | 76978     | 81927.33  | 31989     | 62994.33  | 75197.67  | 132721.67 | 71719.33  | 308199    | 100996.67   | NA        | 0.053283268 | 1.270896335 | 65817.26  | 103409.17 | Up               | 0.651826085759903                                                          | isoform 2 of PH and SEC7 domain-containing protein 1 OS=Mus musculus GN-Ptd                                     |                                                                                |
| PLPFR3       | Q7TFR0-2 | 1  | 1  | NA        | 6202      | NA        | 13774     | 8558      | 19174     | 14621     | NA        | 24244       | NA        | 0.053461682 | 1.270700005 | 9511.333  | 19346.333 | Up               | 1.02434065894124                                                           | isoform 2 of lipid phosphate phosphatase-related protein 3 OS=Mus musculus GN-Lpp3                              |                                                                                |
| SEC23A       | Q01R05   | 4  | 4  | 38302     | 63027     | 72242.25  | 79715.25  | 61735.5   | 83143.25  | 76123.75  | 91453.75  | 64137       | 125951    | 0.054527205 | 1.26542528  | 63004.4   | 91038.35  | Up               | 0.5317347693017                                                            | Protein transport protein Sec23A OS=Mus musculus GN-Sec23a PE-1 Sv-2                                            |                                                                                |
| LAGB4B       | Q6A042   | 2  | 2  | 10284     | 11382.67  | 5294      | 14361.5   | 11020     | 13231     | 13066.5   | 14232.5   | 14267       | 15643.5   | 0.054924966 | 1.265378273 | 10483.8   | 14343.5   | Up               | 0.4523334949137305                                                         | isoform 1 of La-related protein 4B OS=Mus musculus GN-Lagb4b                                                    |                                                                                |
| FAM98B       | Q80187   | 1  | 1  | 6284      | 6235      | 3132      | 6641      | 6363      | 7282      | 7030      | 8372      | 7224        | NA        | 0.054925711 | 1.261015724 | 5731      | 7477      | Up               | 0.383672636788831                                                          | Mitotic spindle-associated MNMD complex subunit MP18 OS=Mus musculus GN-Fam98b PE-1 Sv-1                        |                                                                                |
| SKO2         | Q6V455-2 | 1  | 1  | 3475      | 5606      | NA        | 7077      | 3531      | 8138      | 7541      | NA        | 6731        | NA        | 0.055801029 | 1.258911309 | 4922.25   | 7470      | Up               | 0.601790309192272                                                          | isoform 2 of Protein sidekick-2 OS=Mus musculus GN-Sdk2                                                         |                                                                                |
| SPON1        | Q8V8CV   | 1  | 1  | 4777      | 6214      | 4482      | 3222      | 5416      | 5770      | 5248      | 6740      | 6417        | NA        | 0.055175761 | 1.258251669 | 4822.2    | 7043.75   | Up               | 0.54662571549617                                                           | Spondin-1 OS=Mus musculus GN-Spon1 PE-2 Sv-1                                                                    |                                                                                |
| 2610301202RK | Q3JUP5   | 7  | 7  | 17581.86  | 21833     | 18268.43  | 17994.86  | 19960.71  | 20133.14  | 22347.14  | 20483     | 26465.86    | 20822.86  | 0.055240078 | 1.256802676 | 19067.772 | 21663.914 | Up               | 0.184157537104165                                                          | Protein Glor17 homolog OS=Mus musculus GN-Glor17                                                                |                                                                                |
| WNK3         | Q80WV9   | 1  | 1  | 20717     | 25565     | NA        | 26113     | 15673     | 27243     | 26288     | NA        | 30135       | NA        | 0.055548984 | 1.25502444  | 22017     | 31222     | Up               | 0.50394502508557                                                           | Serine/threonine-protein kinase WNK3 OS=Mus musculus GN-Wnk3 PE-2 Sv-3                                          |                                                                                |
| NOL1AF2      | Q50978   | 2  | 2  | 13027     | 12749.5   | 11403.5   | 14327     | 11385.5   | 13416     | 13971     | NA        | 12546.5     | NA        | 0.056127483 | 1.250476375 | 11800.3   | 13311.833 | Up               | 0.173885738082068                                                          | Mitrimin, mitochondrial OS=Mus musculus GN-Hdula2 PE-2 Sv-2                                                     |                                                                                |
| NEUF         | P51246   | 23 | 23 | 108805.48 | 131166.67 | 90077.52  | 11687.43  | 113267.1  | 87275.43  | 87621.52  | 57393.76  | 7789.67     | 17842.95  | 0.056496163 | 1.247891405 | 102999.84 | 66514.466 | Down             | 0.650556267796563                                                          | Neurofilament heavy polypeptide OS=Mus musculus GN-Neuf PE-1 Sv-3                                               |                                                                                |
| LACTB        | Q5E9P9   | 4  | 4  | 54321.25  | 56895.5   | 56201.25  | 37467     | 50795.5   | 51879     | 87621.52  | 45782.75  | 61139.5     | 74891.5   | 0.056496163 | 1.245139908 | 51119.39  | 62569.2   | Up               | 0.291807953137179                                                          | Serine beta-lactamase-like protein LACTB, mitochondrial OS=Mus musculus GN-Lactb PE-1 Sv-1                      |                                                                                |
| SNK1         | Q9V8W0   | 1  | 1  | 27342     | 38842     | 22091     | 27432     | 22519     | 28934     | 39344     | NA        | 48257       | 41242     | 0.056504908 | 1.244849585 | 27645.2   | 39444.25  | Up               | 0.512785997212188                                                          | Sorting nexin-1 OS=Mus musculus GN-Snx1 PE-1 Sv-1                                                               |                                                                                |
| CAPZA2       | P41736   | 6  | 6  | 91597.33  | 112101.17 | 125903.67 | 80724.83  | 118672.17 | 115126    | 136767    | 141582.67 | 118098.83   | 141582.67 | 0.057337393 | 1.241562816 | 109619.83 | 131410.1  | Up               | 0.261567308390793                                                          | F-actin-capping protein subunit alpha-2 OS=Mus musculus GN-Cappz2 PE-1 Sv-3                                     |                                                                                |
| RIMM1        | Q9N9E5-4 | 31 | 31 | 41564.7   | 44901.52  | 39503.41  | 41222.63  | 50983.37  | 50202.19  | 53666.85  | 47740.59  | 63448.21    | 52761.1   | 0.057558197 | 1.239898219 | 44735.126 | 53545.91  | Up               | 0.295853196037876                                                          | isoform 4 of Regulating vavlike membrane exocytosis protein 1 OS=Mus musculus GN-Rim1m1                         |                                                                                |
| SC9B         | Q8B072-3 | 3  | 3  | 6162      | 6961.33   | 5448      | 6170      | 5634.67   | 5729      | 8357      | 7868.33   | 7147.82     | NA        | 0.058247555 | 1.234745555 | 6566.534  | 8747.25   | Up               | 0.41699210388892                                                           | isoform 3 of Protein scrb1b homolog OS=Mus musculus GN-Sc9b                                                     |                                                                                |
| SLC9A1       | Q6V165   | 6  | 6  | 52062     | 8930.6    | 3797.4    | 12052.6   | 12674.8   | 13944     | 12865.5   | 13040.4   | 0.058937293 | 1.2401381 | 8748.32     | 1325.24     | 12424     | NA        | 0.59726480253958 | isoform 1 of Na+/K+-ATPase exchanger 1 OS=Mus musculus GN-Slc9a1 PE-1 Sv-1 |                                                                                                                 |                                                                                |
| DPSL4        | Q509E8   | 59 | 59 | 11788.5   | 122190.7  | 110061.59 | 98844.03  | 119560.75 | 113717.22 | 130886.81 | 137950.34 | 152019.36   | 156650.56 | 0.060607695 | 1.21701891  | 117562.92 | 138244.86 | Up               | 0.23367247276704                                                           | Dihydropyrimidine-related protein 4 OS=Mus musculus GN-Dpsd4 PE-1 Sv-2                                          |                                                                                |
| DPSL4        | Q509E8   | 59 | 59 | 11788.5   | 122190.7  | 110061.59 | 98844.03  | 119560.75 | 113717.22 | 130886.81 | 137950.34 | 152019.36   | 156650.56 | 0.060607695 | 1.21701891  | 117562.92 | 138244.86 | Up               | 0.23367247276704                                                           | isoform 2 of Dihydropyrimidine-related protein 4 OS=Mus musculus GN-Dpsd4                                       |                                                                                |
| ATAD2        | Q6V166   | 1  | 1  | NA        | 24166     | NA        | 100700.72 | 121535.78 | 115599.62 | 133600.05 | 140180.07 | 159351.43   | NA        | 0.060977017 | 1.216975776 | 119502.54 | 140395.35 | Up               | 0.23392447106075                                                           | ATPase family AAA domain-containing protein 2 OS=Mus musculus GN-Atad2 PE-1 Sv-1                                |                                                                                |
| DLST         | Q2D0G2-2 | 1  | 1  | NA        | 81534.29  | 54867.14  | 47304     | 47084.29  | 47763.14  | 47179.29  | 45486     | 33189.14    | NA        | 0.061322114 | 1.208352594 | 53387.03  | 60717.661 | Up               | 0.299065023349562                                                          | isoform 1 of Dihydropyrimidine-related protein 2 OS=Mus musculus GN-Dlst                                        |                                                                                |
| FAM171B      | Q14H04   | 7  | 7  | 4648      | 8110.25   | NA        | 21944     | 15844     | 24135     | 18173     | NA        | 22788       | NA        | 0.06158742  | 1.199565632 | 15134.75  | 26265.333 | Up               | 0.79529549325663                                                           | Protein FAM171B OS=Mus musculus GN-Fam171b PE-1 Sv-2                                                            |                                                                                |
| NCN1         | Q8V1C8   | 1  | 1  | 4045      | 4955      | 6573      | 5116      | 5874      | 8705      | 7080      | 17477     | 7053        | 14858     | 0.063417494 | 1.197790925 | 5312.6    | 11904.6   | Up               | 1.0873251759344                                                            | Nicotin OS=Mus musculus GN-Ncn1 PE-2 Sv-2                                                                       |                                                                                |
| ATG16L1      | Q8B6M6   | 1  | 1  | 9719      | 12105     | 20730     | 20656     | 19094     | 16510     | 22579     | 27705     | 17862       | 23884     | 0.063481183 | 1.197549891 | 14848.8   | 21876.75  | Up               | 0.54726213306972                                                           | Atg16L1 OS=Mus musculus GN-Atg16l1                                                                              |                                                                                |
| SNRPB        | Q5E9P9   | 4  | 4  | 54321.25  | 56895.5   | 56201.25  | 37467     | 50795.5   | 51879     | 87621.52  | 45782.75  | 61139.5     | 74891.5   | 0.063481183 | 1.197549891 | 14848.8   | 21876.75  | Up               | 0.54726213306972                                                           | isoform 1 of Splicing factor 2, mitochondrial OS=Mus musculus GN-Snrbp2 PE-2 Sv-1                               |                                                                                |
| SLRP         | Q9D8T7   | 9  | 9  | 72456.78  | 75484.67  | 67848.56  | 78077.22  | 76992.22  | 79302.22  | 71601.33  | 91672.56  | 97305.22    | 85289     | 0.064499467 | 1.190443876 | 74171.89  | 85614.065 | Up               | 0.206751313002993                                                          | SRA stem-loop-interacting RNA-binding protein, mitochondrial OS=Mus musculus GN-Slrbp PE-1 Sv-2                 |                                                                                |
| ATG16L1      | Q8B02-3  | 1  | 1  | 3081      | 3141      | NA        | 5057      | 3264      | 5192      | 4845      | NA        | 5165        | NA        | 0.06477066  | 1.189249825 | 3635.75   | 4947.333  | Up               | 0.44439810539994                                                           | isoform 3 of Autophagy-related protein 16-1 OS=Mus musculus GN-Atg16l1                                          |                                                                                |
| ADAM17       | Q5D2F8   | 1  | 1  | 6451      | 11358     | NA        | 18290     | 15967     | 28138     | 20024     | NA        | 20025       | NA        | 0.065199877 | 1.185753224 | 13674     | 22728     | Up               | 0.73103406201088                                                           | Dismigrin and metalloprotease domain-containing protein 17 OS=Mus musculus GN-Adam17 PE-1 Sv-1                  |                                                                                |
| FAM181B      | Q40404   | 1  | 1  | 13025     | 13025     | 74119     | 12456     | 12456     | 12456     | 28978     | 26568     | 14318       | 17801.54  | 0.065997329 | 1.1801324   | 12905     | 20207     | Up               | 0.187486944443261                                                          | Protein FAM181B OS=Mus musculus GN-Fam181b PE-2 Sv-3                                                            |                                                                                |
| HIST1H2AK    | Q6V82K   | 6  | 6  | 479723.67 | 506433.5  | 311687.17 | 90220.83  | 372459.67 | 189972.83 | 183378.67 | 171133.5  | 168525.8    | 11318     | 0.06613055  | 1.178152497 | 293549.97 | 33103.33  | Down             | 1.11322945676607                                                           | Histone H2A type 1-K OS=Mus musculus GN-Hist1h2ak PE-1 Sv-3                                                     |                                                                                |
| OLPH1        | Q8K010   | 1  | 1  | 2265      | 6014      | 6434      | 15510     | 10229     | 14400     | 13214     | 14264     | NA          | NA        | 0.066612922 | 1.1604801   | 8090.4    | 13660     | Up               | 0.75567454519449                                                           | S-oxoprolinase OS=Mus musculus GN-olph1 PE-2 Sv-1                                                               |                                                                                |
| SOXBS2       | Q3U712-2 | 20 | 20 | 51499.9   | 55081.35  | 60444.75  | 39681.95  | 46149.9   | 53515.6   | 62274.7   | 81863.75  | 72340.2     | 69032.4   | 0.067100728 | 1.171490292 | 54166.57  | 68205.59  | Up               | 0.54726213306972                                                           | isoform 2 of Sorbin and SH3 domain-containing protein 2 OS=Mus musculus GN-Sorbs2                               |                                                                                |
| GRB3         | Q5E9P9   | 4  | 4  | 54321.25  | 56895.5   | 56201.25  | 37467     | 50795.5   | 51879     | 87621.52  | 45782.75  | 61139.5     | 74891.5   | 0.067100728 | 1.171490292 | 54166.57  | 68205.59  | Up               | 0.54726213306972                                                           | isoform 1 of Sorbin and SH3 domain-containing protein 2 OS=Mus musculus GN-Sorbs2                               |                                                                                |
| GRB3         | Q5E9P9   | 4  | 4  | 54321.25  | 56895.5   | 56201.25  | 37467     | 50795.5   | 51879     | 87621.52  | 45782.75  | 61139.5     | 74891.5   | 0.067100728 | 1.171490292 | 54166.57  | 68205.59  | Up               | 0.54726213306972                                                           | isoform 1 of Sorbin and SH3 domain-containing protein 2 OS=Mus musculus GN-Sorbs2                               |                                                                                |
| PAK1         | Q8B643   | 11 | 11 | 50765.82  | 50872.82  | 60002.73  | 59716.55  | 66166.27  | 57847.55  | 73889.18  | 69105.55  | 64263.36    | 89001.64  | 0.06720068  | 1.170327339 | 57505.038 | 70820.456 | Up               | 0.300477777133365                                                          | Serine/threonine-protein kinase PAK1 OS=Mus musculus GN-Pak1 PE-1 Sv-1                                          |                                                                                |
| NTSC         | Q9R1M4   | 5  | 5  | 62251.4   | 55437.6   | 67325.6   | 42446     | 59817.4   | 60585.8   | 66068.6   | 81578.2   | 85546.4     | 63071     | 0.067587397 | 1.170318478 | 57415.6   | 71417.2   | Up               | 0.31468297471312                                                           | SKM39                                                                                                           |                                                                                |

|          |          |    |    |           |          |          |           |          |           |           |           |          |             |             |             |           |                 |                                                                                         |                                                                                                                                        |
|----------|----------|----|----|-----------|----------|----------|-----------|----------|-----------|-----------|-----------|----------|-------------|-------------|-------------|-----------|-----------------|-----------------------------------------------------------------------------------------|----------------------------------------------------------------------------------------------------------------------------------------|
| CHL1     | P70232-2 | 1  | 1  | 41009     | 39877    | 21294    | 35265     | 29654    | 41327     | 42239     | 37016     | 46980    | NA          | 0.087478294 | 1.058099698 | 33419.9   | 41890.1         | 0.325920040492038                                                                       | Isomform 2 of Neurial cell adhesion molecule L1-like protein OS-Mus musculus GN-NCN1                                                   |
| GLGIC1   | Q8K390-3 | 1  | 1  | 3203      | 4631     | 3583     | 3001      | 2475     | 4494      | 5157      | NA        | 6739     | NA          | 0.087819815 | 1.056407483 | 3578.6    | 5463.333        | 0.610386153876037                                                                       | Isomform 3 of Glucocorticoid-induced transcript 1 protein OS-Mus musculus GN-Glicot1                                                   |
| ACG1E1   | Q8K396-2 | 1  | 5  | 8554.17   | 2155.2   | 16938.4  | 23864.4   | 25230.2  | 21958.6   | 26300.4   | 28545.2   | 22992.4  | 0.088173151 | 1.054047137 | 21229.28    | 2524.3    | 0.3372238340835 | Isomform 2 of ar-GAP domain and FG repeat-containing protein 1 OS-Mus musculus GN-Agfp1 |                                                                                                                                        |
| RNVL1    | Q8K396-2 | 1  | 5  | 3080      | 2935     | 2927     | 3038      | 3038     | 4052      | 4052      | NA        | 4015     | NA          | 0.088058134 | 1.050514424 | 2952.2    | 5570.6867       | 0.89518765146991                                                                        | RING finger protein 114 OS-Mus musculus GN-RNVL14 Pe-1 Sv-2                                                                            |
| CLASP1   | Q8K396-2 | 8  | 8  | 951.17    | 10807.67 | 9394.5   | 131271.67 | 14453.17 | 13702.83  | 19275.2   | 19212.67  | 20201.17 | 9193.67     | 0.089052866 | 1.05052966  | 1163.636  | 1606.568        | 0.498004466888456                                                                       | Isomform 2 of CLIP-associating protein 1 OS-Mus musculus GN-Clasp1                                                                     |
| CDK13    | Q8K396-2 | 10 | 10 | 10825     | 14951.89 | 25481.67 | 19242.44  | 15693.11 | 19130     | 20892.22  | 36467.89  | 24558.44 | 49656.11    | 0.089132801 | 1.049010924 | 17328.82  | 4040.332        | 0.806304160355446                                                                       | Cadherin-13 OS-Mus musculus GN-Cdk13 Pe-1 Sv-2                                                                                         |
| HMPL15   | Q8K396-2 | 2  | 2  | 43513.15  | 43948.15 | 6175.35  | 63745.35  | 5005.35  | 114610.35 | 90885.35  | 143129    | 99863.35 | NA          | 0.089201731 | 1.049531331 | 3958.4    | 3737.12         | 0.126762729114                                                                          | 3P5 ribosomal protein L35, mitochondrial OS-Mus musculus GN-HmPl15 Pe-1 Sv-1                                                           |
| PRDH1    | Q8K396-2 | 1  | 1  | 4423      | 4423     | 6155     | 4423      | 6155     | 4423      | 6155      | 4423      | 6155     | NA          | 0.089302713 | 1.04510313  | 3958.4    | 3737.12         | 0.680221045540443                                                                       | Phospho-dehydrogenase 1, mitochondrial OS-Mus musculus GN-Prdh1 Pe-1 Sv-1                                                              |
| BAH1DIP2 | G3X457   | 6  | 6  | 56392.6   | 64845.4  | 68028    | 57927     | 69044.8  | 74222.4   | 76640     | 102303    | 91023    | 57525.6     | 0.0901123   | 1.0452153   | 63355.16  | 80342.47        | 0.34720615804073                                                                        | Rab11 family-interacting protein 2 OS-Mus musculus GN-Rab11Ipf2 Pe-1 Sv-2                                                              |
| GART     | G46737   | 2  | 2  | 14500     | 21869    | 17130.5  | 10534.5   | 15360.5  | 17462.5   | 21311     | 42161     | 25891    | 136675.5    | 0.09130246  | 1.04510535  | 158.78    | 34664.2         | 0.1179875259317                                                                         | Trifunctional purine biosynthetic protein adenosine-1 OS-Mus musculus GN-Gart Pe-2 Sv-3                                                |
| UBTD2    | Q6P629   | 2  | 2  | 41492     | 49427    | 38952    | 74809.5   | 48308    | 88407     | 59343.14  | NA        | 73092    | NA          | 0.090124422 | 1.044704773 | 50597.7   | 73611.167       | 0.540852430452445                                                                       | Ubiquitin domain-containing protein 2 OS-Mus musculus GN-Ubtd2 Pe-1 Sv-1                                                               |
| PTEN     | Q08366   | 3  | 3  | 2116      | 9029     | 1461     | 5037      | 7046     | 4202      | 3689      | NA        | 4175     | NA          | 0.09047996  | 1.03414479  | 291.78    | 4088.6667       | 0.52885334232304                                                                        | Phosphatidylinositol 3,4,5-trisphosphate 3-phosphatase and dual-specificity protein phosphatase PTEN OS-Mus musculus GN-Pten Pe-1 Sv-1 |
| PCN4     | P63054   | 3  | 7  | 24608.29  | 27483.86 | 34198.29 | 24858     | 30514    | 28847.43  | 25963.71  | 17387.29  | 26783.43 | 10350.57    | 0.09128514  | 1.039728514 | 29832.488 | 21826.488       | Down                                                                                    | Ubiquitin protein domain 4 OS-Mus musculus GN-Pcn4 Pe-2 Sv-2                                                                           |
| OBRR1-1  | Q8K396-2 | 5  | 2  | 9256      | 11713    | 17942    | 17639.5   | 18893    | 18723.5   | 21956     | 43376     | 13502.5  | 27581       | 0.092024065 | 1.034060981 | 14566.6   | 20131.1         | 0.46676899614628                                                                        | Isomform 2 of CLIP-associating protein 1 OS-Mus musculus GN-Obrr1-1                                                                    |
| LXN      | P70202   | 1  | 1  | 23343     | 19419    | 31745    | 13340     | 20742    | 19929     | 33907     | 43373     | 38420    | NA          | 0.092112467 | 1.035618586 | 2117.8    | 33907.25        | 0.642715814939025                                                                       | Lectrin OS-Mus musculus GN-Lxn Pe-1 Sv-2                                                                                               |
| DMND     | Q8K396-2 | 2  | 2  | 130030    | 19273.5  | 43845    | 25353.5   | 73854    | 22188     | 25139     | NA        | 75213.5  | NA          | 0.092361317 | 1.035452084 | 17303.3   | 26583.83        | 0.5790239138169                                                                         | Phosphomannomutase 1 OS-Mus musculus GN-Dmnd Pe-2 Sv-3                                                                                 |
| BORCS6   | Q8K396-2 | 2  | 2  | 2692.5    | 2409     | 1246     | 4437.5    | 3339     | 3669.5    | 3269.5    | NA        | 6368     | 3632        | 0.092303984 | 1.035250314 | 2623.8    | 4309.75         | 0.71539684911296                                                                        | Uncharacterized protein Ct10769 homolog OS-Mus musculus GN-Borcs6 Pe-1 Sv-1                                                            |
| PMM1     | Q35621   | 7  | 7  | 69525.17  | 52357.33 | 68050.67 | 44793.83  | 64159.17 | 69827.17  | 66537     | 148274.5  | 81556.17 | 88994.17    | 0.09251478  | 1.03632429  | 5876.034  | 91037.802       | 0.641089267575999                                                                       | Phosphomannomutase 1 OS-Mus musculus GN-Pmm1 Pe-1 Sv-1                                                                                 |
| MAP7     | Q8K396-2 | 1  | 1  | 112126    | 88855    | 154683   | 86117     | 114081   | 105360    | 103727    | 233010    | 152316   | 151821      | 0.09239668  | 1.031998835 | 11312.24  | 159546.45       | 0.4959675056892                                                                         | Econinon OS-Mus musculus GN-Map7 Pe-1 Sv-1                                                                                             |
| QUNO1    | Q8K396-2 | 5  | 5  | 3269.4    | 6928     | 7000.2   | 10561.6   | 8352.4   | 11058.2   | 10572.6   | 12785.8   | 7556.4   | 8658.8      | 0.092380712 | 1.031139557 | 2222.72   | 10116.36        | 0.486078134407257                                                                       | Pleiotin-21 OS-Mus musculus GN-Qun1 Pe-1 Sv-1                                                                                          |
| ANX3     | G5E8K5-2 | 23 | 23 | 22926.83  | 28839.78 | 31730    | 34533.65  | 28138.35 | 33425.91  | 34972.66  | 53492.39  | 29611.17 | 48844.22    | 0.09312738  | 1.030939609 | 29633.722 | 4009.99         | 0.434362402013734                                                                       | Isomform 2 of Ankyrin-3 OS-Mus musculus GN-Ank3                                                                                        |
| USCA2    | Q8K396-2 | 10 | 10 | 24307.8   | 31712.4  | 27691    | 22962.6   | 28450.1  | 29944     | 47494.4   | 31942.8   | 34678.14 | 30675.2     | 0.09315418  | 1.030811055 | 27024.78  | 3808.14         | 0.18948691847741                                                                        | Iron-sulfur cluster assembly 2 homolog, mitochondrial OS-Mus musculus GN-USca2 Pe-2 Sv-2                                               |
| ANX1     | G5E8K5   | 21 | 21 | 25027.43  | 31474.3  | 36876.05 | 37702.33  | 30671.31 | 36356.24  | 27454.52  | 58148.33  | 33275.81 | 53605.57    | 0.093093249 | 1.028291202 | 3230.37   | 43728.094       | 0.43477825454689                                                                        | Iron-sulfur cluster assembly 2 homolog, mitochondrial OS-Mus musculus GN-Anx1 Pe-1 Sv-1                                                |
| PP4C1    | Q8K396-2 | 1  | 1  | 4273      | 5166     | 452      | 4552      | 4700     | 8951      | 5564      | NA        | 8902     | NA          | 0.093186513 | 1.025098973 | 389.8     | 6812.333        | 0.805192883821277                                                                       | von Willebrand factor A domain-containing protein 5 OS-Mus musculus GN-Wvfa5a Pe-1 Sv-2                                                |
| ASPK1    | Q8K396-2 | 4  | 4  | 71562.25  | 60057.25 | 48629    | 42520.75  | 62785.5  | 61670     | 52872     | 26142.25  | 31844    | 24726       | 0.094068228 | 1.023722357 | 57110.95  | 39990.85        | Down                                                                                    | Paraspeckle component 1 OS-Mus musculus GN-Aspk1 Pe-1 Sv-1                                                                             |
| PAPC1    | Q6P4U9   | 2  | 2  | 900       | 552.5    | NA       | 3133.5    | 2247.5   | 3138.5    | 2884.5    | NA        | 3380     | NA          | 0.094813073 | 1.023127655 | 1708.375  | 3314.33         | 0.87533926046921                                                                        | Uncharacterized protein FLJ45252 homolog OS-Mus musculus GN-Papc1 Pe-1 Sv-2                                                            |
| ACPI     | Q8K396-2 | 7  | 7  | 24995.5   | 18520    | 31513.17 | 12939     | 21563.81 | 35088.83  | 25209.5   | 41787.67  | 35486.81 | 50606.81    | 0.094808036 | 1.022146014 | 21986.1   | 34535.532       | 0.47146609150316                                                                        | Low molecular weight phosphatidylserine protein phosphatase OS-Mus musculus GN-Acpi Pe-1 Sv-3                                          |
| CPNRM    | Q8K396-2 | 1  | 1  | 41793     | 41849    | 41793    | 41849     | 41793    | 41849     | 41793     | 41849     | 41793    | 41849       | 0.094820031 | 1.021125511 | 4256.6    | 4381.6          | 0.8085605181451054                                                                      | Serine/threonine protein phosphatase 1 regulatory subunit 4 OS-Mus musculus GN-CPnrm Pe-2 Sv-4                                         |
| NAV2     | Q8K396-2 | 6  | 6  | 21800.33  | 32442.17 | 29551.67 | 35657.67  | 26162.17 | 37037.83  | 28563.17  | 4541.33   | 29851.33 | 339189.031  | 0.094834372 | 1.020034372 | 38265.366 | 3661.919        | 0.498487396717759                                                                       | Neuron navigator 1 OS-Mus musculus GN-Nav2 Pe-1 Sv-2                                                                                   |
| NAV1     | Q8K396-2 | 1  | 1  | 637462    | 22263    | 27264    | 14417     | 19739    | 27711     | 26335     | 68000     | 50447    | 23814       | 0.096002246 | 1.017718606 | 20439.8   | 39454.4         | 0.94875796717759                                                                        | Neuron navigator 1 OS-Mus musculus GN-Nav1 Pe-1 Sv-2                                                                                   |
| DEK      | Q7TWN0   | 1  | 1  | 34812     | 46641    | 31257    | 48932     | 62709    | 45627     | 39023     | 12551     | 32760    | NA          | 0.096110128 | 1.016323748 | 50676.2   | 32490.25        | Down                                                                                    | Protein DEK OS-Mus musculus GN-DeK Pe-1 Sv-1                                                                                           |
| ICP1     | Q8K396-2 | 1  | 1  | 49693     | 49693    | 49693    | 49693     | 49693    | 49693     | 49693     | 49693     | 49693    | 49693       | 0.096110128 | 1.016323748 | 50676.2   | 32490.25        | Down                                                                                    | Protein ICP1 OS-Mus musculus GN-Icp1 Pe-1 Sv-1                                                                                         |
| HNIP2L1  | Q8K396-2 | 1  | 1  | 313152    | 200428   | 161926   | 198005    | 227349   | 207465    | 213609    | 62494     | 147355   | 106869      | 0.097157044 | 1.012525768 | 22012     | 147358.2        | 0.37389846035101                                                                        | HNIP-like protein 1 OS-Mus musculus GN-Hnlp2l1 Pe-1 Sv-4                                                                               |
| PAK3     | Q61036   | 6  | 6  | 33037.5   | 40003.5  | 43383.83 | 48723.83  | 38273.5  | 44118.67  | 46359.5   | 58145.67  | 39812.83 | 60893       | 0.097351708 | 1.011656423 | 40684.432 | 4995.934        | 0.2967568034146                                                                         | Serine/threonine protein kinase PAK 3 OS-Mus musculus GN-Pak3 Pe-1 Sv-2                                                                |
| FAMN1    | Q8K396-2 | 3  | 3  | 10461.67  | 11249.33 | 6287.33  | 15809.33  | 10440    | 13009.33  | 133507.33 | NA        | 14131.33 | 16228       | 0.097377402 | 1.011541795 | 10848.132 | 14179.833       | 0.3863985237116                                                                         | Acyl-CoA oxidase 1, mitochondrial OS-Mus musculus GN-Famn1 Pe-1 Sv-2                                                                   |
| PIBF2    | Q8K396-2 | 1  | 1  | 11737     | 24256    | 010302   | 17090     | 18607    | 24063     | 27268     | 38949     | 9909     | NA          | 0.097766409 | 1.010264119 | 16242.6   | 26821           | 0.698747678204528                                                                       | Formylated proteinase inhibitor 2 OS-Mus musculus GN-Pibf2 Pe-1 Sv-2                                                                   |
| ANX2     | Q8K396-2 | 34 | 34 | 159408.33 | 24526.33 | 23501.67 | 28951.67  | 27801.67 | 27801.67  | 27801.67  | 27801.67  | 27801.67 | 27801.67    | 0.097766409 | 1.010264119 | 16242.6   | 26821           | 0.698747678204528                                                                       | Formylated proteinase inhibitor 2 OS-Mus musculus GN-Anx2 Pe-1 Sv-2                                                                    |
| RPLX4    | P62702   | 18 | 18 | 79712.38  | 92650.83 | 83519.5  | 102978.83 | 83548.61 | 87831.28  | 95862.89  | 104476.17 | 99525.28 | 104625.5    | 0.098695338 | 1.005816906 | 88482.01  | 98337.824       | 0.152362272939023                                                                       | 40S ribosomal protein S4, X-histone OS-Mus musculus GN-Rpls4 Pe-2 Sv-2                                                                 |
| HNTH1T   | Q07133   | 5  | 5  | 48559.8   | 256429.8 | 206467.2 | 162368.2  | 33185.4  | 21019.6   | 15783.2   | 125646    | 15783.2  | 15783.2     | 0.099112203 | 1.010387243 | 290126.08 | 165911.08       | Down                                                                                    | Histone H11 OS-Mus musculus GN-Hnth1t Pe-1 Sv-4                                                                                        |
| PDCD10   | Q8K396-2 | 2  | 2  | 9071      | 35659.5  | 27547    | 44376.5   | 42715.5  | 45430     | 43785.5   | NA        | 45007.5  | NA          | 0.099165445 | 1.009136035 | 38475.5   | 44731.333       | 0.219071556397262                                                                       | Programmed cell death protein 10 OS-Mus musculus GN-Pcd10 Pe-1 Sv-1                                                                    |
| ANX3     | Q8K396-2 | 2  | 2  | 9071      | 1521.85  | 632      | 14953.5   | 17205    | 22851     | 1878      | 12285.5   | 1878     | NA          | 0.099165445 | 1.009136035 | 38475.5   | 44731.333       | 0.219071556397262                                                                       | Programmed cell death protein 10 OS-Mus musculus GN-Anx3 Pe-1 Sv-1                                                                     |
| TRIM32   | Q8K396-2 | 2  | 2  | 52051     | 61006    | 51286    | 74618     | 82730    | 82536     | 85305     | 80019     | 69204    | 139713      | 0.100401158 | 1.006166318 | 64378.2   | 91277.4         | 0.50526515564707                                                                        | Ubl ubiquitin protein-ligase TRIM32 OS-Mus musculus GN-Trim32 Pe-1 Sv-2                                                                |
| MTCH1    | Q1A9V5   | 1  | 1  | 61842     | 168421   | 47441    | 295601    | 603126   | 377588    | 399161    | NA        | 219819   | NA          | 0.100428896 | 1.006166318 | 175386.2  | 33039.333       | 0.91341324848866                                                                        | Mitochondrial carrier homolog 1 OS-Mus musculus GN-Mtch1 Pe-2 Sv-1                                                                     |
| FRSLL1   | Q1A9V5   | 1  | 1  | 48871     | 43254.67 | 61860    | 51213     | 47664.33 | 51935.67  | 66774.33  | 59306     | 50391.33 | 76339.33    | 0.100637398 | 0.997159588 | 50753.58  | 61349.332       | 0.273744742430425                                                                       | DCAMON domain-containing protein FRSLL1 OS-Mus musculus GN-Frsll1 Pe-1 Sv-1                                                            |
| CDK4     | Q8K396-2 | 3  | 3  | 59621.4   | 62064.4  | 62272    | 74875.4   | 62111.4  | 63188     | 66458.4   | 26414.4   | 7212.4   | 41913.2     | 0.100771732 | 1.004601732 | 74660.12  | 50927.72        | 0.412398161504043                                                                       | Isomform 1 of Cyclin-dependent protein kinase 4 OS-Mus musculus GN-Cdk4                                                                |
| MRPL46   | Q8K396-2 | 5  | 5  | 17861.6   | 17822.8  | 19467.2  | 14031.2   | 14667    | 19061     | 18159.8   | 27667.6   | 20566.4  | 38133       | 0.103057861 | 0.99542799  | 16765.96  | 24717.56        | 0.560001241685093                                                                       | 3P5 ribosomal protein L46, mitochondrial OS-Mus musculus GN-Mrpl46 Pe-1 Sv-1                                                           |
| SEPT9    | Q8K396-2 | 25 | 25 | 36862.6   | 40655.4  | 40934.2  | 37355.72  | 40042.84 | 43167.16  | 45408.78  | 57909.84  | 51942.04 | 38680.32    | 0.094182075 | 0.994182075 | 45124.008 | 47124.008       | 0.256285116969168                                                                       | Isomform 2 of Septin-9 OS-Mus musculus GN-Sept9                                                                                        |
| DOXK4    | Q61267   | 7  | 7  | 27373.29  | 24513.7  | 32637.39 | 19928.43  | 26110.86 | 25972.39  | 25147.57  | 47997     | 33759.43 | 42694.57    | 0.101498801 | 0.993541275 | 25013.67  | 35114.372       | 0.467874816888176                                                                       | ATP-dependent RNA helicase DOXK4 OS-Mus musculus GN-Doxk4 Pe-1 Sv-3                                                                    |
| DOXK3    | Q61267   | 7  | 7  | 27373.29  | 24513.7  | 32637.39 | 19928.43  | 26110.86 | 25972.39  | 25147.57  | 47997     | 33759.43 | 42694.57</  |             |             |           |                 |                                                                                         |                                                                                                                                        |

|            |          |     |     |           |           |           |           |           |           |           |           |           |             |             |             |           |           |                   |                                                                                        |                                                                                                                                    |
|------------|----------|-----|-----|-----------|-----------|-----------|-----------|-----------|-----------|-----------|-----------|-----------|-------------|-------------|-------------|-----------|-----------|-------------------|----------------------------------------------------------------------------------------|------------------------------------------------------------------------------------------------------------------------------------|
| ATXN2      | Q70005   | 3   | 3   | 156167.87 | 18421.33  | 19447.33  | 16465.33  | 14985.33  | 16753.33  | 17552     | 24084.67  | 22982.67  | 33842       | 0.119630900 | 0.922159684 | 10097.798 | 23044.934 | Up                | 0.43950776870005                                                                       | Ataxin-2 OS=Musculus GN=Atxn2 PE=1 Sv=1                                                                                            |
| RAB11A     | P62492   | 5   | 5   | 83607.8   | 95017.8   | 97392.8   | 143533.2  | 195571    | 1118257   | 141562    | 121566.8  | 120546.6  | 0.119804092 | 0.921520587 | 160328.32   | 133997.24 | Up        | 0.26730906372312  | Ras-related protein Rab-11A OS=Musculus GN=Rab11a PE=1 Sv=3                            |                                                                                                                                    |
| THSD7A     | Q89C16   | 8   | 8   | 8031.62   | 9085.5    | 9085.5    | 14383.98  | 11630.25  | 14655.98  | 14931     | 17966.38  | 15924.62  | 8095.6      | 0.120255295 | 0.918949879 | 10783.95  | 14314.97  | Up                | 0.40643953892656                                                                       | Thrombospondin type 1 domain-containing protein 7A OS=Musculus GN=Thsd7a PE=2 Sv=2                                                 |
| SPON5      | Q02200   | 2   | 2   | 38692     | 38560     | 38360     | 39555     | 46500     | 63342     | 50814     | 39902     | 63342     | 0.120544147 | 0.918258974 | 37385       | 48860.25  | Up        | 0.41543058408377  | Spondin-5 OS=Musculus GN=Spn5 PE=1 Sv=2                                                |                                                                                                                                    |
| EMIL1      | Q056C3   | 1   | 1   | 21319     | NA        | 64690     | 40006     | 47765     | 70582     | 39342     | 103991    | 76992     | NA          | 0.917629002 | 0.917629002 | 43295     | 72265.75  | Up                | 0.37373832260653                                                                       | Isomorph 3 of echinoderm microtubule-associated protein-like 1 OS=Musculus GN=Emil1                                                |
| FAM21      | Q06P07   | 4   | 4   | 37195.67  | 44305.67  | 32230.33  | 20624     | 29992.33  | 36602.67  | 40622     | 33303     | 57343.67  | 67370       | 0.121095134 | 0.916873708 | 32869.6   | 43860.28  | Up                | 0.56004848145753                                                                       | WASH complex subunit FAM21 OS=Musculus GN=Fam21 PE=1 Sv=1                                                                          |
| FAM52      | Q101B4   | 2   | 2   | 2021.33   | 1042      | NA        | 10075     | 10075     | 10075     | 10075     | 10075     | 10075     | 10075       | 0.912311121 | 0.912311121 | 833       | 10075     | Up                | 0.70215132121618                                                                       | Threonine-HRM4 kinase, mitochondrial OS=Musculus GN=Fam52 PE=2 Sv=1                                                                |
| MUP2       | Q290K1   | 5   | 5   | 21372     | 15359.6   | 19406.6   | 14363.6   | 20114.6   | 19207.8   | 14188.6   | 9324      | 12709.4   | 74174       | 0.121485662 | 0.91845662  | 18700.6   | 13300.3   | Down              | 0.46342322538103                                                                       | Myotubular myopathy factor 2 OS=Musculus GN=Mup2 PE=1 Sv=1                                                                         |
| HIST2H2AA1 | Q60557   | 7   | 7   | 439060    | 232573    | 275504.20 | 85424.57  | 295792.86 | 181401.86 | 168625.86 | 108890.20 | 156831.71 | NA          | 0.121863287 | 0.914127112 | 265760.94 | 153960.63 | Down              | 0.787080845634327                                                                      | Histone H2A type 2 A OS=Musculus GN=Hist2h2aa1 PE=1 Sv=3                                                                           |
| GAD1       | P48118   | 7   | 7   | 20197     | 25985.5   | 46898     | 18498.17  | 29193.67  | 28033     | 31588.5   | 65238.5   | 38953.17  | 81245.5     | 0.122171425 | 0.91303036  | 28154.468 | 49011.734 | Up                | 0.799763298834659                                                                      | Glutamate decarboxylase 1 OS=Musculus GN=Gad1 PE=2 Sv=2                                                                            |
| CPH1E      | Q8H106   | 1   | 1   | 19277     | 21430     | 11975     | 24384     | 19930     | 35507     | 27190     | NA        | 28313     | NA          | 0.122289995 | 0.912612378 | 18479.2   | 28861.267 | Up                | 0.55497163181556                                                                       | G-protein 1 OS=Musculus GN=Cph1e PE=1 Sv=1                                                                                         |
| POGFP2     | Q3UM49.3 | 1   | 1   | 12097     | 1276      | 15032     | 14218     | 12918     | 16267     | 12370     | 37264     | 15905     | 27613       | 0.121944479 | 0.91944479  | 1390      | 20999.9   | Up                | 0.649219627110975                                                                      | Isomorph 3 of heparin-derived growth factor-related protein 2 OS=Musculus GN=Hdgfp2                                                |
| ARPC4      | P59999   | 4   | 4   | 32154.5   | 38024     | 49787.75  | 35342     | 33476     | 38625.75  | 45474     | 67049.5   | 48613     | 0.124582079 | 0.904384279 | 37556.85    | 59741.8   | Up        | 0.66202284754574  | Actin-related protein 2/3 complex subunit 4 OS=Musculus GN=Arpc4 PE=1 Sv=3             |                                                                                                                                    |
| PRKAR2A    | P12367   | 11  | 11  | 47279.73  | 50789.09  | 52910     | 70214.36  | 53210.73  | 55193.82  | 48620.30  | 36424.45  | 47427     | 43278.45    | 0.125120482 | 0.901977944 | 54880.782 | 46188.816 | Down              | 0.248757437297455                                                                      | cAMP-dependent protein kinase type II alpha regulatory subunit OS=Musculus GN=Prkar2a PE=1 Sv=2                                    |
| STRAP      | Q02122   | 11  | 11  | 18699.91  | 23911.36  | 19352.36  | 23547.45  | 25790.45  | 24578.91  | 23903.82  | 23548.75  | 27334.64  | 22265.09    | 0.125357802 | 0.901848561 | 21820.306 | 27333.746 | Up                | 0.31416801607479                                                                       | Serine-threonine kinase receptor-associated protein OS=Musculus GN=Strap PE=1 Sv=2                                                 |
| RPNRC1     | Q20149.3 | 5   | 5   | 29522.2   | 33232.8   | 33251.6   | 76100.8   | 33674.8   | 30673.2   | 33110.6   | 23087.2   | 36921.6   | 38901.4     | 0.125209113 | 0.899980078 | 27494.44  | 33171.2   | Up                | 0.26861524100236                                                                       | Isomorph 3 of heparin-derived growth factor-related protein 2 OS=Musculus GN=Rpnrc1                                                |
| STRK2      | Q8Q2V4   | 2   | 2   | 6425.5    | 7470      | 14470.5   | 3370      | 8782      | 6628.5    | 7804.5    | 23088     | 15406     | 23467       | 0.126121447 | 0.899110975 | 8103.6    | 15580.8   | Up                | 0.915085260708525                                                                      | Serine/threonine protein kinase 32C OS=Musculus GN=Strk2 PE=2 Sv=1                                                                 |
| CTCS       | P80316   | 28  | 28  | 63273.71  | 63196.82  | 59381.46  | 60285.86  | 54471     | 60055.82  | 59510.43  | 78596.54  | 61343.64  | 81988.61    | 0.126268945 | 0.898730448 | 68735.57  | 62929.008 | Up                | 0.217630166737589                                                                      | T-complex protein 1 subunit epsilon OS=Musculus GN=Ctcs PE=1 Sv=1                                                                  |
| CLASP2     | Q8B8T1   | 21  | 21  | 18017.81  | 32063.33  | 28358     | 39525.86  | 40202.9   | 47085.9   | 57588.57  | 34604.76  | 38653.9   | 34488.67    | 0.126451018 | 0.89807767  | 31997.18  | 42484.35  | Up                | 0.408897609753719                                                                      | GTP-associating protein 2 OS=Musculus GN=Clasp2 PE=1 Sv=1                                                                          |
| OPF12      | Q28513   | 174 | 174 | 174831.35 | 126447.44 | 134815.85 | 115548.63 | 120276.84 | 127324.46 | 153787.99 | 141555.36 | 137811.91 | 121792.35   | 0.127369213 | 0.904935119 | 124385.58 | 132744.75 | Up                | 0.093400927524399                                                                      | Dihydropyrimidinase-related protein 2 OS=Musculus GN=Opf12 PE=1 Sv=2                                                               |
| MKPS14     | Q10C88   | 4   | 4   | 44605     | 46795.5   | 60616     | 15926     | 37502     | 36298.5   | 35174.5   | 113804    | 84170.5   | 88880       | 0.127441128 | 0.904490395 | 41083.9   | 71665.5   | Up                | 0.807205628182452                                                                      | 28S ribosomal protein S14, mitochondrial OS=Musculus GN=Mkps14 PE=2 Sv=1                                                           |
| DNAB12     | Q9QV14   | 1   | 1   | 17105     | 24905     | 17475     | 35183     | 39222     | 39122     | 39122     | NA        | 26374     | NA          | 0.127503501 | 0.894477891 | 24349.4   | 33593     | Up                | 0.464274417306493                                                                      | DnaI homolog subfamily B member 12 OS=Musculus GN=Dnab12 PE=2 Sv=1                                                                 |
| DBT        | P53305   | 2   | 2   | 41688     | 36876     | 43227.5   | 39071.5   | 24511.5   | 32927.5   | 72925     | 24428.5   | 72177.5   | 72074       | 0.127602313 | 0.894148513 | 71075.2   | 7984.6    | Down              | 0.300881716123928                                                                      | Liposome nucleotide-binding protein G0L subunit alpha-2 OS=Musculus GN=Dbt PE=2 Sv=2                                               |
| POE4A      | Q8Q8B4.3 | 1   | 1   | 5208      | 3034      | 3068      | 6939      | 3681      | 5308      | 19314     | 6861      | 11430     | NA          | 0.892160876 | 0.892160876 | 1493      | 7396.15   | Up                | 0.5830851112211                                                                        | Isomorph 3 of cAMP-specific 38 kDa OS=Musculus GN=Po4a PE=1 Sv=1                                                                   |
| DOCK6      | P63874   | 1   | 1   | 76734     | 63607     | 63607     | 61093     | 71459     | 81313     | 91276     | 83724     | 70262     | 0.901385003 | 0.901385003 | 65136       | 73185.003 | Up        | 0.215184850013    | Isomorph 3 of Arp2/3 complex subunit 3 OS=Musculus GN=Dock6 PE=1 Sv=1                  |                                                                                                                                    |
| RALA       | P63321   | 4   | 4   | 36398     | 46302.67  | 32231     | 37926.67  | 34445.33  | 45292     | 40665.67  | 86894     | 48264.67  | 46871       | 0.128362459 | 0.891561973 | 37420.74  | 53597.468 | Up                | 0.518132690054948                                                                      | Ras-related protein Rab-A OS=Musculus GN=Rala PE=1 Sv=1                                                                            |
| SHANK3     | Q4C4UC.6 | 5   | 5   | 24802.6   | 23607     | 15956.2   | 24826.6   | 30224.4   | 18697.6   | 20854.4   | 11154     | NA        | 0.128402005 | 0.891425151 | 38883.96    | 16902     | Down      | 0.498848088107895 | Isomorph 5 of SH3 and multiple ankyrin repeat domains protein 3 OS=Musculus GN=Shank3  |                                                                                                                                    |
| GNBR2      | P34682   | 2   | 2   | 28893.5   | 53857     | 70415.5   | 60999     | 78895     | 78895     | 7351.5    | 64901.5   | 90224     | 0.128765642 | 0.895165642 | 47473.2     | 39        | Up        | 0.5092472810216   | Isomorph 2 of G-protein-coupled receptor subunit beta-2 OS=Musculus GN=Gnbr2 PE=1 Sv=2 |                                                                                                                                    |
| SPZ7       | Q2U174   | 2   | 2   | 4382      | 4782      | 4838      | 5161      | 5598.5    | 5725      | 5598.5    | 8905      | 5811      | 7835        | 0.129243131 | 0.887980808 | 42701.3   | 6268.8    | Up                | 0.553842460210188                                                                      | Isomorph 7 of Arp2/3 complex subunit 3 OS=Musculus GN=Spz7 PE=1 Sv=1                                                               |
| CORO7      | Q0D077   | 3   | 3   | 4393.5    | 5385      | 5990      | 4645.5    | 5063      | 5057.5    | 7340.5    | 5074.5    | 6713.5    | 0.130159472 | 0.89054789  | 5151.4      | 6191.2    | Up        | 0.483278485063288 | Coronin-7 OS=Musculus GN=Coro7 PE=2 Sv=2                                               |                                                                                                                                    |
| PRRC2B     | Q07PM1   | 1   | 1   | NA        | 1472      | NA        | 3333      | 1441      | 7386      | 3450      | NA        | 3957      | NA          | 0.13104984  | 0.87666806  | 2078.6667 | 4931      | Up                | 0.24622182552449                                                                       | Protein PRRC2B OS=Musculus GN=Prirc2b PE=1 Sv=1                                                                                    |
| PELM       | Q62094   | 19  | 19  | 37284.56  | 53297.89  | 48897.13  | 66429.78  | 62498.11  | 73730.78  | 74416.48  | 62479.33  | 67565.78  | 68970.08    | 0.131058007 | 0.875958919 | 53611.69  | 65028.478 | Up                | 0.278524848489857                                                                      | Paracalmin-1 OS=Musculus GN=Pelm PE=1 Sv=1                                                                                         |
| CLIPB      | P41008   | 1   | 1   | 3075      | NA        | NA        | 1414      | NA        | 9618      | 4557.5    | NA        | 1412      | NA          | 0.74417852  | 0.74417852  | 10444.461 | NA        | Up                | 0.786289971888033                                                                      | Isomorph 3 of Arp2/3 complex subunit 3 OS=Musculus GN=Clipb PE=1 Sv=2                                                              |
| ITX7       | Q70439   | 8   | 8   | 85597     | 31231.86  | 25316.14  | 60039     | 35028.14  | 52215.86  | 53667.71  | 40417     | 47360.43  | 43638       | 0.131749605 | 0.873707483 | 34042.428 | 47458.9   | Up                | 0.479372083204975                                                                      | Syntaxin-7 OS=Musculus GN=Itx7 PE=1 Sv=3                                                                                           |
| SCAM5      | P06025   | 27  | 27  | 19158.63  | 96600.37  | 80305.07  | 104586.93 | 118378.22 | 118793.8  | 131067.72 | 116571.67 | 142507.3  | 833687      | 0.13369284  | 0.873994762 | 98144.844 | 118462.64 | Up                | 0.2674842781349069                                                                     | Intercellular adhesion molecule 5 OS=Musculus GN=Scam5 PE=1 Sv=2                                                                   |
| OPTN       | Q8H484   | 2   | 2   | 11053.23  | 10758.5   | 8791.5    | 9536      | 9775.5    | 11648.5   | 11722     | NA        | 15347     | NA          | 0.133976039 | 0.872369947 | 10103     | 12906.167 | Up                | 0.513827808652722                                                                      | Optineurin OS=Musculus GN=Optn PE=1 Sv=1                                                                                           |
| QSOX       | P21884   | 1   | 1   | 77884     | 58192     | 58192     | 57083     | 57083     | 57083     | 57083     | 57083     | 57083     | 57083       | 0.134000009 | 0.872369947 | 52922.13  | 85243.15  | Up                | 0.6455108803939                                                                        | Cytoskeletal transition initiator protein 2 OS=Musculus GN=Qsox PE=1 Sv=2                                                          |
| B51N       | Q8B737   | 212 | 212 | 20695.29  | 31407.33  | 31629.96  | 41477.38  | 32945.03  | 42669.68  | 37175.75  | 37587.77  | 44992.64  | 38431.31    | 0.137122849 | 0.871722849 | 34631.938 | 40049.231 | Up                | 0.210923271263336                                                                      | Protein bassoon OS=Musculus GN=B51n PE=1 Sv=4                                                                                      |
| GLP2R      | Q9C1V5   | 1   | 1   | 5105      | 7781      | 2350      | 2462      | 6468      | 6480      | 7464      | NA        | 9602      | NA          | 0.137167444 | 0.867167444 | 5683.2    | 7850      | Up                | 0.491600417097914                                                                      | Glycyl-associated palmitic pathogenesis-related protein 1 OS=Musculus GN=Glpr2 PE=2 Sv=3                                           |
| GRAMM4     | Q10M44   | 17  | 17  | 99236.35  | 105113.48 | 117401.24 | 76691.06  | 99575.19  | 106169.12 | 104703.66 | 161466.94 | 98895.88  | 149456      | 0.135225692 | 0.884940788 | 98808.578 | 124012.12 | Up                | 0.372773871570941                                                                      | Dihydroxylysine-residue acetyltransferase complex of pyruvate dehydrogenase complex, mitochondrial OS=Musculus GN=Gramm4 PE=1 Sv=2 |
| OTX12      | Q21012   | 3   | 3   | 1395.5    | 1628      | 1667      | 2279      | NA        | 17903.5   | 20963.5   | 2009.5    | NA        | 0.135741178 | 0.867167444 | 5683.2      | 7850      | Up        | 0.372773871570941 | Isomorph 3 of Arp2/3 complex subunit 3 OS=Musculus GN=Otx12 PE=2 Sv=1                  |                                                                                                                                    |
| TRIM3      | Q8H182   | 10  | 10  | 34792.67  | 34174.22  | 45447.11  | 30950.89  | 33095.67  | 36127.44  | 36912.44  | 63317.44  | 40105.11  | 70491.67    | 0.135797831 | 0.867107167 | 35692.32  | 49373.82  | Up                | 0.468074217103924                                                                      | Triglyceride motif-containing protein 3 OS=Musculus GN=Trim3 PE=1 Sv=1                                                             |
| POE12      | Q3U174   | 1   | 1   | 1131      | 1474      | NA        | 7418      | 3637      | 6602      | 5533      | 6314      | 6830      | NA          | 0.135837431 | 0.866809452 | 3415      | 6322.3333 | Up                | 0.888571522160374                                                                      | Isomorph 3 of Arp2/3 complex subunit 3 OS=Musculus GN=Po12 PE=2 Sv=2                                                               |
| GDI1       | P50396   | 30  | 30  | 134525.7  | 17922.63  | 172003.11 | 153577.2  | 184868.1  | 180315.53 | 205487.27 | 142734.1  | 214530.87 | 208883.13   | 0.135951904 | 0.866615697 | 164493.55 | 130430.38 | Up                | 0.233574568564151                                                                      | Rab GDP dissociation inhibitor protein 41 OS=Musculus GN=Gdi1 PE=1 Sv=3                                                            |
| ALGAP1     | Q10A04   | 1   | 1   | 81365     | 70217     | 72411     | 45528     | 88713     | 70217     | 64591     | 88713     | 70217     | 70217       | 0.136126181 | 0.867107167 | 35692.32  | 49373.82  | Up                | 0.745792135772707                                                                      | Arp2/3 complex interacting protein OS=Musculus GN=Algap1 PE=1 Sv=2                                                                 |
| MPS22      | Q9CWO2   | 1   | 1   | 13559     | 14802     | 9761      | 18552     | 11015     | 18530     | 11468     | 21998     | 22726     | NA          | 0.136141022 | 0.86513812  | 13368.8   | 18673     | Up                | 0.6455108803939                                                                        | 28S ribosomal protein S22, mitochondrial OS=Musculus GN=Mps22 PE=2 Sv=1                                                            |
| GFAP       | P03995   | 29  | 29  | 69661.04  | 67526.14  | 69242.5   | 60895.07  | 69983.75  | 67500.96  | 64580.89  | 80226.68  | 76554.89  | 87912.07    | 0.137593765 | 0.867122221 | 67461.7   | 10259.098 | Up                | 0.160669919107414                                                                      | Glycyl fibrillary acidic protein OS=Musculus GN=GFap PE=1 Sv=4                                                                     |
| VPS36      | Q10D16   | 1   | 1   | 41853     | 36677     | 29872     | 34389     | 36460     | 36533     | 51303     | NA        | 55161     | NA          | 0.137593765 |             |           |           |                   |                                                                                        |                                                                                                                                    |

|          |          |    |    |           |           |           |            |           |           |           |           |           |             |             |             |             |           |                  |                                                                                         |                                                                                                                       |                                                                         |
|----------|----------|----|----|-----------|-----------|-----------|------------|-----------|-----------|-----------|-----------|-----------|-------------|-------------|-------------|-------------|-----------|------------------|-----------------------------------------------------------------------------------------|-----------------------------------------------------------------------------------------------------------------------|-------------------------------------------------------------------------|
| GNM1     | Q2R9H2   | 7  | 7  | 808957    | 125300.43 | 122320.57 | 117432.71  | 138656.14 | 156041.43 | 215227.44 | 128408.43 | 116982.86 | 132627.43   | 0.15039293  | 0.022772581 | 116921.48   | 149780.06 | Up               | 0.35730550787615                                                                        | Osmic nucleotide-binding protein G11 subunit alpha-1 OS-Mus musculus GN-Gna11 Pe-2 Sv-1                               |                                                                         |
| PSD1     | Q17PM6   | 2  | 2  | 18528.5   | 24171.5   | 8773.5    | 22682      | 24630.5   | 29209     | 23994.5   | NA        | 29465     | NA          | 0.150713837 | 0.821846874 | 19765.2     | 25232.833 | Up               | 0.38080708692676                                                                        | Fibronectin type III and SPRY domain-containing protein 1 OS-Mus musculus GN-Fncl1 Pe-2 Sv-1                          |                                                                         |
| OC7K5    | Q6Q828   | 2  | 2  | 52120.5   | 62197     | 42167.5   | 53932      | 56621     | 59491     | 62925     | 55492     | 56952     | 54489.2     | 0.150818493 | 0.821508451 | 54489.2     | 60491.133 | Up               | 0.32969271                                                                              | Dinactin subunit 3 OS-Mus musculus GN-Din3 Pe-1 Sv-1                                                                  |                                                                         |
| GAPVD1   | Q6Q8M5.4 | 2  | 2  | 22895.5   | 33885.5   | 21551.5   | 22889.5    | 21480.5   | 24910.5   | 43785.5   | NA        | 87792     | 72605.5     | NA          | 0.150954038 | 0.821545535 | 24473.7   | 43086.23         | Up                                                                                      | 0.815783110850389                                                                                                     | Isolating factor, proline- and glutamine-rich OS-Mus musculus GN-Gapvd1 |
| HIST1H4C | P15B64   | 16 | 16 | 324752.12 | 175980    | 214555.14 | 94129.36   | 126972.06 | 149329.81 | 148755.62 | 143292.81 | 133331.62 | 106964.62   | 0.151008999 | 0.197227.79 | 130444.62   | Down      | 0.59679100650982 | Histone H1.2 OS-Mus musculus GN-Hist1h2 Pe-1 Sv-2                                       |                                                                                                                       |                                                                         |
| TPM4     | Q6B1U2   | 2  | 2  | 48443.5   | 48770     | 35146.5   | 48079      | 33673.5   | 67554.5   | 57234     | 80129     | 93494     | 31150       | 0.151443707 | 0.819748769 | 46992.7     | 65912.3   | Up               | 0.488111052770394                                                                       | Transposon alpha-4 chain OS-Mus musculus GN-Tpm4 Pe-2 Sv-3                                                            |                                                                         |
| VCP      | Q01E53   | 84 | 84 | 68427.2   | 77681.18  | 66776.8   | 75755.92   | 68041.4   | 79131.2   | 78307.35  | 73411.55  | 87369.61  | 75102.15    | 0.151492515 | 0.819748769 | 74143.07    | 77681.18  | Up               | 0.392517186435191                                                                       | Transgelatin endoprotease/refectin ATPase OS-Mus musculus GN-Vcp1 Pe-1 Sv-4                                           |                                                                         |
| SPQ      | Q0B06    | 10 | 10 | 117809.5  | 66178.3   | 77295.4   | 48048.9    | 80401.9   | 50504.1   | 34028.2   | 62470.15  | 55594.3   | 786         | 0.151588219 | 0.819748769 | 786         | 57214.14  | Down             | 0.454480759829125                                                                       | Isolating factor, proline- and glutamine-rich OS-Mus musculus GN-SPQ Pe-1 Sv-1                                        |                                                                         |
| NTRK2    | P15209.3 | 7  | 7  | 14994.86  | 21596.57  | 19194.43  | 28219.14   | 22018.43  | 29782.86  | 25813.86  | 32371.86  | 24175.29  | 20557.29    | 0.81886186  | 0.151575329 | 0.81886186  | 36540.232 | Up               | 0.784830553157618                                                                       | Isomerase of 11- and 17- growth factors receptor OS-Mus musculus GN-Ntrk2                                             |                                                                         |
| ARHGAP24 | Q09PT1   | 18 | 18 | 100126.33 | 99455.33  | 82141.53  | 85896.78   | 91239.28  | 95548     | 84308.5   | 83945.72  | 11621.22  | 0.151830767 | 0.818640215 | 0.818640215 | 21028.68    | 43332.544 | Down             | 0.307798015076247                                                                       | Rho GTP-dissociation inhibitor 1 OS-Mus musculus GN-Arhgap24 Pe-1 Sv-1                                                |                                                                         |
| OTU9     | Q8HNA3   | 1  | 1  | 36894     | 36669     | 11175     | 45122      | 40941     | 44877     | 32177     | 29900     | 54595     | 78997       | 0.818309005 | 0.818309005 | 33545.6     | 49701.1   | Up               | 0.56732187880856                                                                        | Probable 2-OTU9/HNA71 deacetylase 2 OS-Mus musculus GN-OTU9 Pe-2 Sv-3                                                 |                                                                         |
| CEP720   | Q0U949   | 2  | 2  | 16755     | 15599.62  | 17711.91  | 141144.17  | 20075.9   | 17831.57  | 20642.14  | 15715.74  | 29988.62  | 0.152157945 | 0.817705384 | 0.817705384 | 15977.68    | 27044.904 | Up               | 0.23297116188856                                                                        | Centrosomal protein of 170 kDa protein 8 OS-Mus musculus GN-Cep720 Pe-1 Sv-2                                          |                                                                         |
| MBD12    | Q8C813.3 | 2  | 2  | 31814.5   | 1950      | 5885      | 9955       | 4271      | 8539.5    | 7250      | 4848      | 8049      | 9413.5      | 0.817264479 | 0.817264479 | 5043.7      | 7627.2    | Up               | 0.59667106401072                                                                        | Isomerase of 3 Muscibell-like protein 2 OS-Mus musculus GN-Mbd12 Pe-1 Sv-1                                            |                                                                         |
| HAPLN4   | Q8BVM4   | 1  | 1  | 40522     | 57447     | 23621     | 42082      | 50132     | 42156     | 45800     | 66452     | 44782     | 69742       | 0.15283361  | 0.815781551 | 44782       | 53786.4   | Up               | 0.425720189579983                                                                       | Hyaluronan and proteoglycan link protein 4 OS-Mus musculus GN-Hapln4 Pe-2 Sv-2                                        |                                                                         |
| OTU40B   | Q8CH2    | 4  | 4  | 35905.67  | 37868     | 16262.33  | 46117.33   | 42859.33  | 45410     | 47134     | 40030.33  | 47958     | NA          | 0.814598313 | 0.814598313 | 35826.266   | 45333.083 | Up               | 0.33316728930303                                                                        | OTU domain-containing protein 68 OS-Mus musculus GN-OTU40B Pe-2 Sv-1                                                  |                                                                         |
| RMH1     | Q8DQD2.2 | 2  | 2  | 22023.5   | 19333     | 16661.5   | 12027.5    | 18166     | 21475.5   | 12508     | 8348      | 9454      | 11639.5     | 0.152992241 | 0.815333031 | 17869.5     | 13399     | Down             | 0.4102030373932                                                                         | Isomerase 2 of RNA-binding protein 14 OS-Mus musculus GN-Rmh1                                                         |                                                                         |
| CR2C2    | Q3U182   | 2  | 2  | 11212.5   | 6195.5    | NA        | 1779       | 1977      | 2101      | 2066.5    | NA        | 1669      | NA          | 0.153358433 | 0.813839471 | 1356.5      | 1945.5    | Up               | 0.511768585698715                                                                       | CREB-regulated transcription coactivator 2 OS-Mus musculus GN-Cr2c2 Pe-1 Sv-1                                         |                                                                         |
| PIA2     | Q8OU04   | 2  | 2  | 11213     | 11869.5   | 12239.5   | 11114      | 12406     | 11586     | 9506.5    | 11677.5   | 10244.5   | NA          | 0.813662703 | 0.813662703 | 11768.4     | 10753.625 | Down             | 0.13009512075898                                                                        | E3 ubiquitin-protein ligase Praja-2 OS-Mus musculus GN-Pia2 Pe-1 Sv-2                                                 |                                                                         |
| ESD      | Q8N9P3   | 1  | 1  | 18161     | 16172     | 21364     | 18176      | 15155     | 22785     | 21134     | 14444     | 24923     | NA          | 0.81333373  | 0.81333373  | 17865.6     | 21125.25  | Up               | 0.25969670007062                                                                        | 5-Hormylglutathione hydrolase OS-Mus musculus GN-Esd Pe-1 Sv-1                                                        |                                                                         |
| RABEP1   | Q3SS51.4 | 2  | 2  | 30789.5   | 12342     | 2972.5    | 17611.5    | 15533     | 19188.5   | 16792.5   | 11820     | 27391.5   | NA          | 0.153917262 | 0.812560332 | 11849.7     | 14881.125 | Up               | 0.64462219769169                                                                        | Isomerase of Rab GTP-binding effector protein 1 OS-Mus musculus GN-Rabep1                                             |                                                                         |
| SEC22B   | Q08547   | 1  | 1  | 6049      | 6978      | NA        | 14514      | 11693     | 15713     | 17508     | NA        | 10700     | NA          | 0.154007481 | 0.812458191 | 9808.5      | 14640.333 | Up               | 0.577843927374743                                                                       | Vesicle-trafficking protein SEC22b OS-Mus musculus GN-SEC22B Pe-1 Sv-3                                                |                                                                         |
| BNP214   | Q8B913.3 | 6  | 6  | 16892.4   | 14722.4   | 13793.6   | 16398.4    | 16634.2   | 15044.2   | 17009.2   | 16234.6   | 26360     | 28253.4     | 0.154436746 | 0.811249353 | 1587.88     | 20581.48  | Up               | 0.391696323967924                                                                       | Isomerase of 3 RING finger protein 214 OS-Mus musculus GN-Bnp214                                                      |                                                                         |
| NUMB1    | Q8U009   | 9  | 9  | 91385.78  | 95237.67  | 81605.67  | 68038.48   | 83766.56  | 80461.78  | 89603.78  | 89138.33  | 117235.44 | 128388.44   | 0.154518863 | 0.811018497 | 84005.824   | 101255.55 | Up               | 0.269439787490904                                                                       | Numb-like protein OS-Mus musculus GN-Numb1 Pe-1 Sv-3                                                                  |                                                                         |
| GNM3     | Q2C551   | 4  | 4  | 137409.75 | 211238    | 209094.75 | 196819     | 238057.75 | 267578.25 | 215287.25 | 197585.5  | 228129.25 | 0.155527932 | 0.808011906 | 199803.85   | 254945.95   | Up        | 0.3581202181578  | Guanine nucleotide-binding protein G12 subunit alpha OS-Mus musculus GN-Gna13 Pe-1 Sv-3 |                                                                                                                       |                                                                         |
| PP2R5E   | Q61551   | 1  | 1  | NA        | NA        | 2002      | NA         | 3984      | 2501      | 4419      | 5925      | NA        | NA          | 0.15573943  | 0.807448487 | 3829        | 4543.3333 | Up               | 0.68345897551563                                                                        | Series/threonine-protein phosphatase 2A 56 kDa regulatory subunit epsilon isoform OS-Mus musculus GN-Pp2r5e Pe-2 Sv-3 |                                                                         |
| DXX1     | Q81V85   | 7  | 7  | 48055.15  | 53118.83  | 69107.67  | 29474      | 36457.67  | 44595.67  | 59954.67  | 84471.33  | 63834     | 131337      | 0.156046524 | 0.806745002 | 51266.6     | 78838.514 | Up               | 0.62081782364656                                                                        | ATP-dependent RNA helicase DDX1 OS-Mus musculus GN-Dxx1 Pe-1 Sv-3                                                     |                                                                         |
| SGR      | P47791   | 2  | 2  | 139719    | 152816    | 250009.5  | 72375.5    | 127170    | 147118    | 180087    | 249399.5  | 226393    | 63161       | 0.156113053 | 0.806477748 | 175418      | 249040.4  | Up               | 0.6168775097278                                                                         | Glutathione reductase, mitochondrial OS-Mus musculus GN-Sgr Pe-1 Sv-3                                                 |                                                                         |
| GLD1B    | Q2U184   | 2  | 2  | 52805     | 72722.5   | 56767.5   | 36312      | 44770     | 60496     | 60788     | 76313.5   | 68849.5   | 71375       | 0.806471702 | 0.806471702 | 56688.8     | 67724.5   | Up               | 0.75866592726149                                                                        | Glutathione-1, mitochondrial OS-Mus musculus GN-Gld1b Pe-1 Sv-1                                                       |                                                                         |
| CEP720   | Q8HNA3   | 1  | 1  | 36894     | 36669     | 11175     | 45122      | 40941     | 44877     | 32177     | 29900     | 54595     | 78997       | 0.817705384 | 0.817705384 | 15977.68    | 27044.904 | Up               | 0.23297116188856                                                                        | Centrosomal protein of 170 kDa protein 8 OS-Mus musculus GN-CEP720 Pe-1 Sv-2                                          |                                                                         |
| SART1    | Q2R315   | 3  | 3  | 12124.5   | 15024     | 16034     | 10784      | 13920.5   | 15417     | 16222.5   | NA        | 15081     | NA          | 0.156764233 | 0.80753047  | 13577.4     | 15236.833 | Up               | 0.166355681498913                                                                       | uL16/US tri-nitrophenyl-associated protein 1 OS-Mus musculus GN-Sart1 Pe-2 Sv-1                                       |                                                                         |
| ACOT7    | Q19V12.3 | 14 | 14 | 60363     | 63211.29  | 87907     | 33410.36   | 56796.29  | 56762.93  | 56762.93  | 103376.07 | 75350.79  | 126522.29   | 0.156835674 | 0.804555145 | 60337.588   | 80591.958 | Up               | 0.495965764154516                                                                       | Acyl-CoA of cytosolic acyl coenzyme A thioester hydrolase OS-Mus musculus GN-Acot7                                    |                                                                         |
| GLD1B    | Q8HNA3   | 1  | 1  | 36894     | 36669     | 11175     | 45122      | 40941     | 44877     | 32177     | 29900     | 54595     | 78997       | 0.817705384 | 0.817705384 | 15977.68    | 27044.904 | Up               | 0.23297116188856                                                                        | Centrosomal protein of 170 kDa protein 8 OS-Mus musculus GN-GLD1B Pe-1 Sv-2                                           |                                                                         |
| SUPV1L   | Q18D01   | 1  | 1  | 34679     | 30803     | 30410     | 20523      | 35335     | 39335     | 45005     | 61796     | 112897    | 0.80432033  | 0.80432033  | 31813.3     | 57273       | Up        | 0.85578890109285 | ATP-dependent RNA helicase SUPV1L, mitochondrial OS-Mus musculus GN-Supv1l Pe-2 Sv-1    |                                                                                                                       |                                                                         |
| MDM1     | P14152   | 56 | 56 | 154629.48 | 186093.5  | 185174.45 | 122802.02  | 196677.52 | 173224.48 | 223854.48 | 205527.5  | 167881.59 | 241522.73   | 0.15740273  | 0.804336227 | 157402.73   | 202927.78 | Up               | 0.24640167398955                                                                        | Nucleic acid dephosphorylation, cytoplasmic OS-Mus musculus GN-Mdm1 Pe-1 Sv-3                                         |                                                                         |
| UBR5     | P55183   | 1  | 1  | 21270     | 18426     | 22196     | 14278      | 25787     | 21613     | 25321     | NA        | 36759     | 56000       | 0.15736321  | 0.803372512 | 20380.2     | 44835.75  | Up               | 0.773400414899572                                                                       | Ubiquitin-proteasome-III synthase OS-Mus musculus GN-Ubr5 Pe-2 Sv-1                                                   |                                                                         |
| ARPC3    | Q8Q898   | 13 | 13 | 77005.69  | 77486     | 73977.08  | 66790.08   | 75705.46  | 65807.15  | 75129.24  | 57022.54  | 67648.38  | 74739.08    | 0.80345525  | 0.80345525  | 74209.032   | 68034.476 | Down             | 0.125371339248567                                                                       | Actin-related protein 3/2 complex subunit 3-like protein OS-Mus musculus GN-Arpc3 Pe-1 Sv-1                           |                                                                         |
| CRP2     | Q19V12.3 | 14 | 14 | 60363     | 63211.29  | 87907     | 33410.36   | 56796.29  | 56762.93  | 56762.93  | 103376.07 | 75350.79  | 126522.29   | 0.15740273  | 0.804336227 | 157402.73   | 202927.78 | Up               | 0.24640167398955                                                                        | Ubiquitin-proteasome-III synthase OS-Mus musculus GN-Crp2 Pe-1 Sv-1                                                   |                                                                         |
| CKMT1    | P30275   | 87 | 87 | 68406.94  | 67597.17  | 61015.81  | 60936.59   | 67495.42  | 62714.81  | 63318.81  | 59483.77  | 65402.12  | 56893.87    | 0.802078571 | 0.802078571 | 65090.386   | 61562.768 | Down             | 0.080385257971498                                                                       | Creatine kinase U-type, mitochondrial OS-Mus musculus GN-Ckmt1 Pe-1 Sv-1                                              |                                                                         |
| LSM14B   | Q8C074   | 2  | 2  | 41705.5   | 55662.5   | 69230.5   | 27744      | 45575     | 44910     | 55645     | 124029    | 62005     | 145541.5    | 0.158102318 | 0.801063108 | 47983.5     | 89327.1   | Up               | 0.8965593511903                                                                         | Protein LSM14 homolog B OS-Mus musculus GN-Lsm14b Pe-2 Sv-3                                                           |                                                                         |
| STRP1    | Q8C079.4 | 1  | 1  | 7669      | 8691      | NA        | 43720      | 20731     | 42363     | 43680     | NA        | 29207     | NA          | 0.158790299 | 0.799176024 | 20450.25    | 36083.333 | Up               | 0.819214139202096                                                                       | Isomerase 4 of Striatin-interacting protein 1 OS-Mus musculus GN-Strp1                                                |                                                                         |
| HR23C    | Q19V12.3 | 14 | 14 | 60363     | 63211.29  | 87907     | 33410.36   | 56796.29  | 56762.93  | 56762.93  | 103376.07 | 75350.79  | 126522.29   | 0.15740273  | 0.804336227 | 157402.73   | 202927.78 | Up               | 0.24640167398955                                                                        | Ubiquitin-proteasome-III synthase OS-Mus musculus GN-Hr23c Pe-1 Sv-1                                                  |                                                                         |
| PKM      | Q6H803   | 4  | 4  | 21170.25  | 27423.5   | 1850.5    | 34107.35   | 37291.5   | 45122.25  | 45122.25  | 56079.25  | 31906.25  | NA          | 0.159407749 | 0.797509648 | 24368.6     | 36533.333 | Up               | 0.588920216922974                                                                       | Isomerase 3 of Phalloidin-4 OS-Mus musculus GN-Pkm                                                                    |                                                                         |
| HRAS     | Q61411   | 31 | 31 | 91221.3   | 104523.9  | 98531.55  | 106818.4   | 105015.41 | 96784.17  | 109630.69 | 95033.93  | 131234.83 | 157280.86   | 0.159418317 | 0.79742405  | 99396.068   | 116010.9  | Up               | 0.247115096725003                                                                       | GTPase HRAS OS-Mus musculus GN-Hras Pe-1 Sv-2                                                                         |                                                                         |
| GLI3     | Q3U0U5.2 | 2  | 2  | 119173.5  | 149455.5  | 183219.5  | 223877.5   | 202598    | 214356.5  | 197798.5  | 195518    | 187110.5  | 159438.018  | 0.159738155 | 0.79738155  | 22417.6     | 45009.4   | Up               | 0.10047392715295                                                                        | Isomerase 3 of Protein SOG4 OS-Mus musculus GN-Gli3 Pe-1 Sv-2                                                         |                                                                         |
| PLA1H1B  | Q19V12.3 | 14 | 14 | 60363     | 63211.29  | 87907     | 33410.36   | 56796.29  | 56762.93  | 56762.93  | 103376.07 | 75350.79  | 126522.29   | 0.15740273  | 0.804336227 | 157402.73   | 202927.78 | Up               | 0.24640167398955                                                                        | Ubiquitin-proteasome-III synthase OS-Mus musculus GN-Pla1h1b Pe-1 Sv-1                                                |                                                                         |
| GANAB    | Q8HNA3   | 4  | 4  | 37863.25  | 93047     | 109212.5  | 87949.75   | 76054.75  | 97090     | 95048.75  | 138106.25 | 91180.75  | 100639      | 0.794822903 | 0.80285453  | 88285.45    | 104831.25 | Up               | 0.24756938047566                                                                        | Neutral alpha-glucosidase AB OS-Mus musculus GN-Ganab Pe-1 Sv-1                                                       |                                                                         |
| LDHA     | P06151   | 9  | 9  | 139122.22 | 49364.11  | 63831.78  | 39586.67</ |           |           |           |           |           |             |             |             |             |           |                  |                                                                                         |                                                                                                                       |                                                                         |

|         |           |     |     |           |           |           |           |           |           |           |           |           |             |             |             |           |           |                   |                                                                                                         |                                                                                               |
|---------|-----------|-----|-----|-----------|-----------|-----------|-----------|-----------|-----------|-----------|-----------|-----------|-------------|-------------|-------------|-----------|-----------|-------------------|---------------------------------------------------------------------------------------------------------|-----------------------------------------------------------------------------------------------|
| POURIC  | PS2432    | 1   | 1   | 14122     | 15502     | 10393     | 768       | 740       | 2052      | 10929     | NA        | 1588      | NA          | 176717899   | 0.176717899 | 1033.4    | 1757.3333 | Up                | 0.61008978408134                                                                                        | DNA-directed RNA polymerase I and II subunit RPAC1 OS-Mus musculus GN-Polr1c Pe-1 Sv-3        |
| MBP     | PD4370-9  | 52  | 52  | 921470.19 | 92788.62  | 838126.68 | 400264.9  | 778633.73 | 575824.77 | 778633.73 | 663242.13 | 488441.45 | 751390.52   | 0.17671651  | 0.75262552  | 735157.66 | 568548.95 | Down              | 0.37076900398721                                                                                        | Isomorph 9 of Myelin basic protein OS-Mus musculus GN-MbP                                     |
| MAP2B1  | A2A0      | 8   | 8   | 2287.38   | 28031.25  | 31569.38  | 17487.38  | 23877.38  | 2394.38   | 2560.75   | 26001.5   | 41591.88  | 42386.13    | 0.17673787  | 0.2525759   | 24686.354 | 1391.728  | Up                | 0.37076900398721                                                                                        | MAP2 domain-containing protein 1 OS-Mus musculus GN-MbP20 Pe-1 Sv-1                           |
| PARK7   | Q9D900    | 23  | 23  | 104170.51 | 122800.81 | 122800.81 | 110343.3  | 92741.3   | 103954.63 | 133063.17 | 134853.3  | 133100.41 | 0.17715593  | 0.75164423  | 100322.61   | 118208.47 | Up        | 0.22748317356741  | Protein D1-1 OS-Mus musculus GN-Park7 Pe-1 Sv-1                                                         |                                                                                               |
| CRFAC1  | CR8555    | 4   | 4   | 18512.25  | 11696.75  | 5580.75   | 22337.7   | 24357.25  | 25828.75  | 27863.25  | NA        | 29416     | NA          | 0.17715593  | 0.20951.28  | 20968.6   | 27702.667 | Up                | 0.43462616223699                                                                                        | Cartilage acidic protein 1 OS-Mus musculus GN-Crfac1 Pe-1 Sv-1                                |
| VPF5    | Q8EOQ2    | 1   | 1   | 3084      | 6674      | 2623      | 8396      | 3456      | 7755      | 5771      | NA        | 6918      | NA          | 0.177483899 | 0.750401038 | 4846.6    | 6144.667  | Up                | 0.491670071828236                                                                                       | Protein VPF5 OS-Mus musculus GN-Vpf5 Pe-2 Sv-1                                                |
| PTPBP1  | Q8H9-R3   | 1   | 1   | 3084      | 6674      | 2623      | 8396      | 3456      | 7755      | 5771      | NA        | 6918      | NA          | 0.177483899 | 0.750401038 | 4846.6    | 6144.667  | Up                | 0.491670071828236                                                                                       | Protein VPF5 OS-Mus musculus GN-Vpf5 Pe-2 Sv-1                                                |
| Q9D9V4  | Q9D9V4    | 3   | 3   | 11344.31  | 15377.68  | NA        | 8050      | 19208.67  | 18969.67  | 16029.67  | 22459.9   | 13459     | 19257.67    | 0.178707102 | 0.742937132 | 17393.868 | 17938.418 | Up                | 0.37806013586932                                                                                        | Cytlin-5 associated kinase OS-Mus musculus GN-Cp47 Pe-1 Sv-2                                  |
| CDP2    | Q9D9X3    | 1   | 1   | 1126      | NA        | NA        | 2250      | 1862      | 2853      | 4116      | NA        | 1965      | NA          | 0.178153991 | 0.74920444  | 1746      | 1978      | Up                | 0.77029019495266                                                                                        | Coatomer subunit gamma-2 OS-Mus musculus GN-Cop2 Pe-2 Sv-2                                    |
| NIT2    | Q9D9W2    | 5   | 5   | 69661.6   | 82252.2   | 110192.2  | 42509.2   | 80009.6   | 70016.4   | 84775.8   | 84652.8   | 109929.8  | 246372      | 0.179350546 | 0.746506774 | 74665.36  | 115233.96 | Up                | 0.7269726297219                                                                                         | Omega-amidase NIT2 OS-Mus musculus GN-Nit2 Pe-1 Sv-1                                          |
| HS2AL   | F48722    | 21  | 21  | 27865.17  | 13790.36  | 47970.48  | 38180.17  | 43231.11  | 42497.08  | 40572.59  | 80509.48  | 51149.13  | 0.17987308  | 0.745301802 | 38027.468   | 50809.9   | Up        | 0.41804967786813  | Heat shock 70 kDa protein 4L OS-Mus musculus GN-Hs2AL Pe-1 Sv-2                                         |                                                                                               |
| CELF1   | P28655    | 5   | 5   | 53820     | 42702.8   | 66854.6   | 27034.8   | 49362.4   | 38668.2   | 47955.4   | 46813.4   | 52581.1   | 0.179841007 | 0.745311072 | 41454.336   | 55598.058 | Up        | 0.41214914952079  | Heat shock 70 kDa protein 4L OS-Mus musculus GN-Hs2AL Pe-1 Sv-2                                         |                                                                                               |
| AGK     | Q9E5W4    | 2   | 2   | 60621     | 91198     | 101342.5  | NA        | 61738.5   | 71711.1   | 80793.5   | 10086.5   | 102139.5  | 0.179841007 | 0.745311072 | 41454.336   | 55598.058 | Up        | 0.41214914952079  | Heat shock 70 kDa protein 4L OS-Mus musculus GN-Hs2AL Pe-1 Sv-2                                         |                                                                                               |
| RP54    | PE1264    | 17  | 17  | 11734.88  | 11958     | 163374.53 | 48799     | 103768.71 | 83179.06  | 119753.8  | 139710.47 | 179702.82 | 0.20993906  | 0.742487885 | 10749.82    | 15820.36  | Up        | 0.50613259723603  | Epidermal growth factor receptor OS-Mus musculus GN-ErbB Pe-1 Sv-1                                      |                                                                                               |
| EGFR    | Q9D9T4    | 1   | 1   | 13270     | 13250     | NA        | 14630     | 11380     | 1624      | 1920      | NA        | 15720     | NA          | 0.74184863  | 1.30274     | 1507      | 1507      | Up                | 0.2096341083208                                                                                         | Epidermal growth factor receptor OS-Mus musculus GN-ErbB Pe-1 Sv-1                            |
| ADU1    | Q9D9V5    | 35  | 35  | 38576.36  | 41173.03  | 49554.22  | 44154.64  | 40731.78  | 41756.81  | 42044.36  | 57938.89  | 47157.69  | 0.33872.75  | 0.740795509 | 42918.06    | 48536.1   | Up        | 0.177475139852808 | Adenylate kinase isoenzyme 1 OS-Mus musculus GN-Ak1 Pe-1 Sv-1                                           |                                                                                               |
| NADH57  | Q9D9C7    | 11  | 11  | 95428.55  | 88691.36  | 94206.36  | 101586.18 | 76457.55  | 94419.09  | 72088.05  | 9043.45   | 67809.55  | 0.181865796 | 0.740248967 | 91274       | 81389     | Down      | -0.16368220620973 | NADH dehydrogenase (ubiquinone) iron-sulfur protein 7, mitochondrial OS-Mus musculus GN-Ndh57 Pe-1 Sv-1 |                                                                                               |
| WIFP3   | PCU10     | 6   | 6   | 43406.17  | 41246.83  | 49575.83  | 26055     | 50830.17  | 47270     | 47663.5   | 35999.33  | 80829.67  | 0.181955681 | 0.740043482 | 42222.3     | 56716.166 | Up        | 0.411935910477937 | WAS/WAS-interacting protein family member 3 OS-Mus musculus GN-Wifp3 Pe-1 Sv-1                          |                                                                                               |
| MTFR1   | Q9D9W2    | 3   | 3   | 4173      | 1653      | 5054      | 2635.57   | 3266      | 3026.67   | 2778.67   | 13508.33  | 4091      | 0.00537.67  | 0.740029952 | 3454.334    | 6871.889  | Up        | 1.0006719748869   | Orphan light chain roadblock 1 OS-Mus musculus GN-Orphan1 Pe-1 Sv-1                                     |                                                                                               |
| FAU     | PE6282    | 2   | 2   | 121460    | 117424.5  | 197528.5  | 86384     | 123676.5  | 121063.5  | 147768    | 179351.5  | 192947.4  | 0.181955681 | 0.739301558 | 192947.4    | 192127.4  | Up        | 0.56462611660829  | 40S ribosomal protein S30 OS-Mus musculus GN-Fau Pe-1 Sv-1                                              |                                                                                               |
| STRN4   | PS8404    | 26  | 26  | 23230.7   | 26391.35  | 25077.78  | 24354.4   | 28283.78  | 28313.78  | 33132.74  | 21891.87  | 32837.17  | 0.18246809  | 0.739111645 | 25467.608   | 28616.372 | Up        | 0.168177314558885 | Striatin-4 OS-Mus musculus GN-Strn4 Pe-1 Sv-2                                                           |                                                                                               |
| CEP70   | GA6005    | 17  | 17  | 36966     | 38454.88  | 43027.06  | 26425.94  | 31550.35  | 30262.41  | 37618.41  | 42193.53  | 56299.37  | 0.182411726 | 0.738947247 | 36204.846   | 46035.058 | Up        | 0.35454186724025  | Centrosomal protein of 170 kDa OS-Mus musculus GN-Cep70 Pe-1 Sv-2                                       |                                                                                               |
| VDNR1   | PG277     | 12  | 12  | 41579.92  | 39811.58  | 55187.5   | 27185     | 38031.17  | 36084.67  | 37993.08  | 87115.08  | 49076.33  | 0.182521574 | 0.738076654 | 40349.234   | 62507.89  | Up        | 0.631497203465766 | Cytochrome b5 reductase OS-Mus musculus GN-Vdnr1 Pe-1 Sv-1                                              |                                                                                               |
| WARS    | P31921    | 3   | 3   | 43239.33  | 50676     | 39006     | 30838.67  | 51153.67  | 43136.33  | 42055     | 51346.33  | 52021.67  | 0.18253145  | 0.738662636 | 42998.734   | 50008.2   | Up        | 0.218407246179772 | Tryptophan-tRNA ligase, cytoplasmic OS-Mus musculus GN-Wars Pe-1 Sv-2                                   |                                                                                               |
| ACTR1B  | Q8R5C5    | 7   | 7   | 74225.29  | 80827.29  | 84242.86  | 50362.43  | 72880.57  | 69224.43  | 74811     | 115183.14 | 86871.14  | 0.177401.71 | 0.738662636 | 72999.688   | 104608.28 | Up        | 0.53218241489075  | Beta-centractin OS-Mus musculus GN-Actr1b Pe-1 Sv-1                                                     |                                                                                               |
| DNAB1   | Q9D9T3    | 2   | 2   | 12922     | 17777     | 11887.5   | 17404     | 11281.5   | 15468     | 77080     | 46556     | 27098     | NA          | 0.18313569  | 0.737605062 | 13254.4   | 25595.5   | Up                | 0.849418825412355                                                                                       | DNA homolog subfamily B member 11 OS-Mus musculus GN-Dnab1 Pe-1 Sv-1                          |
| IMN1    | PE1731    | 14  | 14  | 144       | 2173.57   | 25091.21  | 23400.31  | 14272.51  | 17365.57  | 23400.31  | 14272.51  | 2173.57   | 0.18313569  | 0.73662552  | 30179.756   | 21357.564 | Down      | 0.49215508978714  | Imn1-80 OS-Mus musculus GN-Imn1 Pe-1 Sv-1                                                               |                                                                                               |
| Q9D9V5  | Q9D9V5    | 33  | 33  | 36245.18  | 40889.25  | 49845.25  | 34012.48  | 39750.48  | 36303.48  | 41760.48  | 48616.48  | 63033.48  | 0.18313569  | 0.73662552  | 30179.756   | 21357.564 | Down      | 0.49215508978714  | Imn1-80 OS-Mus musculus GN-Imn1 Pe-1 Sv-1                                                               |                                                                                               |
| PODZ1   | Q9D9C9    | 3   | 3   | 26548     | 26666     | 26667     | 18347     | 25412     | 20732     | 31621     | 51032     | 30506     | 0.18313569  | 0.735537762 | 24646.8     | 33728.2   | Up        | 0.409136669931888 | POZ domain-containing protein 11 OS-Mus musculus GN-Pod1 Pe-1 Sv-1                                      |                                                                                               |
| MAK10   | CE1811    | 1   | 1   | 52088     | 65866     | 131423    | 54579     | 59169     | 55870     | 92014     | 96393     | 134827    | 0.184232559 | 0.734414911 | 72909       | 105807    | Up        | 0.533746848565941 | Mitogen-activated protein kinase 10 OS-Mus musculus GN-Mak10 Pe-1 Sv-2                                  |                                                                                               |
| ACTH2   | Q9D9V2    | 10  | 10  | 56364.35  | 60889.25  | 69845.25  | 112155.25 | 77521.25  | 101093.62 | 81849.71  | 95573     | 81849.71  | 0.184232559 | 0.734414911 | 72909       | 105807    | Up        | 0.533746848565941 | Mitogen-activated protein kinase 10 OS-Mus musculus GN-Mak10 Pe-1 Sv-2                                  |                                                                                               |
| UBAP2   | Q8R5C3    | 6   | 6   | 29022.4   | 21564.6   | 34062.8   | 31590     | 45199     | 23043.8   | 25513.4   | 42718.8   | 25284.8   | 0.184232559 | 0.734414911 | 72909       | 105807    | Up        | 0.533746848565941 | Ubiquitin-associated protein 2 OS-Mus musculus GN-Ubp2 Pe-1 Sv-1                                        |                                                                                               |
| BSN     | Q8H737-2  | 208 | 208 | 29997.89  | 31533.01  | 31338.04  | 42026.5   | 39841.92  | 42026.5   | 41330.07  | 31790.31  | 45066.1   | 0.184795104 | 0.73380954  | 37352.472   | 39854.44  | Up        | 0.197624845456625 | Isomorph 2 of protein basson OS-Mus musculus GN-Bsn                                                     |                                                                                               |
| RALGSP1 | A2A890    | 1   | 1   | 6136      | 13884     | 2594      | 20321     | 11495     | 22534     | 15812     | 13456     | 13796     | NA          | 0.184892651 | 0.73380954  | 10882     | 16399.5   | Up                | 0.591708969057542                                                                                       | Ras-specific guanine nucleotide-releasing factor RalGSP1 OS-Mus musculus GN-Ralgsp1 Pe-1 Sv-2 |
| GCN5    | Q9D9W5    | 6   | 6   | 25910     | 22188.84  | 25848.5   | 17127.5   | 16359     | 17455.34  | 20427.67  | 44988.5   | 27935.5   | 0.184892651 | 0.73380954  | 10882       | 16399.5   | Up        | 0.591708969057542 | GCN5 cleavage system H protein, mitochondrial OS-Mus musculus GN-Gcn5 Pe-1 Sv-1                         |                                                                                               |
| SCN5B   | P2505     | 2   | 2   | 25109     | 32705.3   | 32705.3   | 24615.3   | 31846.78  | 29665.67  | 33976.67  | 37596     | 36831.67  | 0.185085166 | 0.732186395 | 69495.63    | 54097.62  | Down      | 0.370759341358464 | Isomorph 10 of Myelin basic protein OS-Mus musculus GN-Mbp                                              |                                                                                               |
| MBP     | PD4370-10 | 53  | 53  | 876064.28 | 700396.89 | 804291.85 | 371323.13 | 744231.98 | 548957.87 | 347263.81 | 628754.15 | 461204.87 | 0.185273828 | 0.732186395 | 69495.63    | 54097.62  | Down      | 0.370759341358464 | Isomorph 10 of Myelin basic protein OS-Mus musculus GN-Mbp                                              |                                                                                               |
| RACK1   | PE8400    | 2   | 2   | 16142     | 17628     | 16957     | 20031     | 16086     | 27360     | 18568     | NA        | 21298     | NA          | 0.18540044  | 0.731879799 | 17368.8   | 22406     | Up                | 0.367387034154744                                                                                       | Guanine nucleotide-binding protein subunit beta-2-like 1 OS-Mus musculus GN-Rack1 Pe-1 Sv-1   |
| CHCHD4  | Q9D9V4    | 2   | 2   | 12799.51  | 114999.5  | 120030    | 138912.5  | 118151    | 124170    | 131133    | 121658    | 116545.5  | 0.185851631 | 0.731461433 | 12297.7     | 87259     | Down      | -0.46216790612675 | Mitochondrial intermembrane space import and assembly protein 40 OS-Mus musculus GN-Chchd4 Pe-1 Sv-1    |                                                                                               |
| CDL2    | Q9D9T4    | 1   | 1   | 5127      | 10751     | NA        | 5127      | 10751     | 12164     | 11128     | NA        | 11128     | NA          | 0.185851631 | 0.731461433 | 12297.7   | 87259     | Down              | -0.46216790612675                                                                                       | CDL2 OS-Mus musculus GN-Cdl2 Pe-1 Sv-1                                                        |
| DUSL3   | Q9D9T3    | 2   | 2   | 30197     | 33481     | 12322.5   | 22550.5   | 43374.5   | 40557     | 21658     | 61284.5   | NA        | 0.185851631 | 0.731461433 | 12297.7     | 87259     | Down      | -0.46216790612675 | DUSL3 OS-Mus musculus GN-Dusl3 Pe-1 Sv-1                                                                |                                                                                               |
| STRN1   | Q8C9T9-2  | 1   | 1   | 34882     | 37556     | 46211     | 74994     | 49470     | 63464     | 61043     | 63229     | 46360     | 0.186649275 | 0.728973672 | 46861.4     | 63345.25  | Up        | 0.378965783175333 | Striatin-1 OS-Mus musculus GN-Strn1 Pe-1 Sv-1                                                           |                                                                                               |
| THN3    | Q70166    | 3   | 3   | 79146.67  | 67847.67  | 79229.67  | 76785     | 82497.67  | 70707.67  | 47965.33  | 73280     | 4466.33   | 0.186767244 | 0.728973672 | 46861.4     | 63345.25  | Up        | 0.378965783175333 | Thn3 OS-Mus musculus GN-Thn3 Pe-1 Sv-1                                                                  |                                                                                               |
| TRN2    | Q9D9T3    | 3   | 3   | 80724.33  | 80931.33  | 124370.33 | 124370.33 | 124370.33 | 124370.33 | 124370.33 | 124370.33 | 124370.33 | 0.186767244 | 0.728973672 | 46861.4     | 63345.25  | Up        | 0.378965783175333 | Thn3 OS-Mus musculus GN-Thn3 Pe-1 Sv-1                                                                  |                                                                                               |
| PKP     | Q9D9U3-2  | 8   | 8   | 23378     | 22801.25  | 45409.62  | 26404.5   | 27094     | 28139     | 31232.5   | 57831.12  | 29322.88  | 0.187214137 | 0.72759873  | 29057.874   | 41951.9   | Up        | 0.52896089739766  | Isomorph 2 of E-cadherin/cadherin type 3 OS-Mus musculus GN-Pkp                                         |                                                                                               |
| CEP97   | Q8C9B2    | 2   | 2   | 2144      | 2305      | 2210      | 5818      | 5725      | 5614      | 7532      | 2259      | NA        | 0.187214137 | 0.72759873  | 29057.874   | 41951.9   | Up        | 0.52896089739766  | Centrosomal protein of 97 kDa OS-Mus musculus GN-Cep97 Pe-2 Sv-1                                        |                                                                                               |
| CLU     | Q8C9B0    | 8   | 8   | 42873.12  | 33054.25  | 39756.38  | 27038.38  | 36926.62  | 38154.88  | 36585.25  | 70927.88  | 46024.25  | 0.187214137 | 0.72759873  | 29057.874   | 41951.9   | Up        | 0.52896089739766  | Centrosomal protein of 97 kDa OS-Mus musculus GN-Cep97 Pe-2 Sv-1                                        |                                                                                               |
| CLU     | Q8C9B0    | 8   | 8   | 42873.12  | 33054.25  | 39756.38  | 27038.38  | 36926.62  | 38154.88  | 36585.25  | 70927.88  | 46024.25  | 0.187214137 | 0.72759873  | 29057.874   | 41951.9   | Up        | 0.52896089739766  | Centrosomal protein of 97 kDa OS-Mus musculus GN-Cep97 Pe-2 Sv-1                                        |                                                                                               |
| MARK4   | Q8C9B0    | 8   | 8   | 42873.12  | 33054.25  | 39756.38  | 2         |           |           |           |           |           |             |             |             |           |           |                   |                                                                                                         |                                                                                               |

|          |           |    |    |          |           |           |           |           |           |           |            |           |              |                  |                                                                              |           |                   |                                                                                       |                                                                                                                 |
|----------|-----------|----|----|----------|-----------|-----------|-----------|-----------|-----------|-----------|------------|-----------|--------------|------------------|------------------------------------------------------------------------------|-----------|-------------------|---------------------------------------------------------------------------------------|-----------------------------------------------------------------------------------------------------------------|
| CHL1     | P70232    | 2  | 4  | 262622   | 24608     | 1         | 22692.5   | 26058     | 30694.5   | NA        | 1.188091   | 22171.5   | 29044.875    | 0.38957272461442 | Neural cell adhesion molecule-like protein O5-Mus-musculus GN-Chn1 Pe-1 Sv-2 |           |                   |                                                                                       |                                                                                                                 |
| MANF     | Q70045    | 4  | 4  | 12332.25 | 79781     | 136254    | 146977.75 | 108890    | 111077.75 | 36661.25  | 102020.5   | 30069.25  | 0.1982872616 | 113137.3         | 8133.75                                                                      | Down      | 4.478528366953187 | Mesencephalic astrocyte-derived neurotrophic factor O5-Mus-musculus GN-Manf Pe-1 Sv-2 |                                                                                                                 |
| MDP1     | Q80967    | 2  | 2  | 2330.5   | 39647.5   | 36617     | 58521.5   | 52523.5   | 45340     | 28019.5   | 90719      | 42421     | 0.080850.5   | 1.498669077      | 38088.8                                                                      | 57092.4   | 0.546558128148791 | Magnesium-dependent phosphatase 1 O5-Mus-musculus GN-Mdp1 Pe-1 Sv-2                   |                                                                                                                 |
| EPH4L3   | Q80V92-7  | 32 | 32 | 23032.59 | 26358.25  | 243359.25 | 28379.72  | 25568.10  | 31498.31  | 28757.81  | 21630.00   | 28883.62  | 30272.56     | 0.7020707492     | 25538.2                                                                      | 28396.474 | 0.152998365093338 | Isomorph 7 of Band 4.3-like protein 1 O5-Mus-musculus GN-Eph4l3                       |                                                                                                                 |
| STM2     | PE8093    | 2  | 2  | 12655.5  | 18764.5   | 39935     | 10988     | 18799.5   | 21875.5   | 22112     | 102619.5   | 28867.5   | 54763.1      | 0.198838181      | 22009.1                                                                      | 46087.1   | 0.10667235982357  | Stromal interband 4-like protein 1 O5-Mus-musculus GN-Stm2 Pe-1 Sv-2                  |                                                                                                                 |
| FAT3     | Q88NA6    | 1  | 1  | 3673     | 4441      | 2210      | 117926    | 8695      | 10052     | 10051     | 7638       | 8040      | NA           | 0.199579301      | 0.098984502                                                                  | 4463      | 9095.25           | 0.49249031984195                                                                      | Proteocardin fat 3 O5-Mus-musculus GN-Fat3 Pe-1 Sv-2                                                            |
| GNANB    | Q80985    | 2  | 2  | 92128    | 109085    | 144993.5  | 110196.5  | 144993.5  | 123261.5  | 16781.25  | 13019.25   | 10917.3   | 0.1986131    | 0.2368117        | 19091.3                                                                      | 10683.98  | 0.2368117         | Isomorph 3 of Neuronal alpha-glucosidase AB O5-Mus-musculus GN-Gnanb                  |                                                                                                                 |
| RP21     | PA7355    | 5  | 9  | 43828.12 | 65866.2   | 73199.38  | 41095.75  | 49068.12  | 41533.12  | 47348.12  | 88724.88   | 62297.38  | 120769.5     | 0.0988621754     | 48607.598                                                                    | 73178.678 | 0.1986131         | 9055 acidic ribosomal protein P2 O5-Mus-musculus GN-Rp21 Pe-1 Sv-2                    |                                                                                                                 |
| MAP7D1   | A2A8D5    | 7  | 7  | 19950.57 | 26615.71  | 28908.14  | 18148     | 22731     | 22838.71  | 24838     | 22721.86   | 39392.29  | 35209        | 0.200081169      | 0.098789447                                                                  | 23267.084 | 28997.972         | 0.317661554065851                                                                     | Isomorph 2 of MAP7 domain-containing protein 1 O5-Mus-musculus GN-Map7d1                                        |
| ABH187A1 | Q8V062    | 1  | 1  | 3213     | 2653      | NA        | 8766      | 7477      | 8346      | 8057      | 7222       | 11557     | NA           | 0.200223276      | 0.068483919                                                                  | 5527.25   | 8295.5            | 0.585762072514215                                                                     | UPF066 protein C11orf68 homolog O5-Mus-musculus GN-Abh187a1                                                     |
| ACTR1A   | 51164     | 5  | 5  | 87971    | 88993.4   | 109252    | 52783.4   | 81031     | 79729.4   | 8874.74   | 12981.18   | 100214.74 | 200459.4     | 0.200316667      | 0.097494987                                                                  | 83899.56  | 11899.64          | 0.507503464271454                                                                     | Actin contractin O5-Mus-musculus GN-Actr1a Pe-1 Sv-2                                                            |
| ATP5B1   | P5016     | 40 | 40 | 8904.26  | 100927.74 | 99662.97  | 92983.45  | 86890.46  | 106311.41 | 18013.13  | 13332.74   | 81355.85  | 13450.26     | 0.200082287      | 0.097175107                                                                  | 93951.716 | 10431.98          | 0.185448013175884                                                                     | V-type proton ATPase catalytic subunit 1 O5-Mus-musculus GN-Atp5b1 Pe-1 Sv-2                                    |
| CCNY     | Q88G55    | 1  | 1  | 54673    | 81999     | 429527    | 61309     | 68673     | 87232     | 68743     | 106847     | 106847    | NA           | 0.095557587      | 0.095557587                                                                  | 61424.2   | 124082.25         | 0.1019902659548                                                                       | Cyclin-Y O5-Mus-musculus GN-Ccny Pe-1 Sv-2                                                                      |
| EXOC6B   | A6H323    | 1  | 1  | 2257     | 2468      | NA        | 6511      | 5584      | 6861      | 5422      | 7654       | 4457      | NA           | 0.201864092      | 0.094940928                                                                  | 4205      | 6098.5            | 0.536348637491459                                                                     | Exocyst complex component 6B O5-Mus-musculus GN-Exoc6b Pe-1 Sv-2                                                |
| MRPL49   | Q8CQ40    | 4  | 4  | 4612.5   | 5270      | 4640      | 2487.5    | 4339.5    | 4825.5    | 3542.5    | 7083       | 5838.5    | 13590.5      | 0.20215902       | 0.094306877                                                                  | 4274.5    | 6076              | 0.706644366246783                                                                     | 39S ribosomal protein L49, mitochondrial O5-Mus-musculus GN-Mrpl49 Pe-2 Sv-1                                    |
| GRAC1    | Q82380    | 1  | 1  | 1330     | 1332      | NA        | 2123      | 1700      | 2878      | 4780      | NA         | 4364      | NA           | 0.20218474       | 0.094513626                                                                  | 1632.5    | 3009              | 0.876033709400216                                                                     | Gamma-glutamylaminocotransferase O5-Mus-musculus GN-Grac1 Pe-1 Sv-1                                             |
| MAST4    | Q81116    | 1  | 1  | 2029     | NA        | NA        | 1745      | 764       | 743       | 8576      | NA         | NA        | NA           | 0.202732625      | 0.094148781                                                                  | 1512.6667 | 801               | 0.917219960542471                                                                     | Microtubule-associated serine/threonine-protein kinase 4 O5-Mus-musculus GN-Mast4 Pe-2 Sv-3                     |
| MMP      | P04370-13 | 43 | 43 | 1067687  | 850704.42 | 973799.77 | 440382.42 | 988442.12 | 657894.56 | 112761.63 | 761953.84  | 505680.35 | 895728.95    | 0.202374246      | 0.093844757                                                                  | 846203.14 | 585803.87         | 0.367739625759887                                                                     | Isomorph 12 of Myelin basic protein O5-Mus-musculus GN-Mmp                                                      |
| SNCAPI   | Q19169    | 1  | 1  | 12508    | 21374     | 23508     | 18488     | 17081     | 14082     | 17025     | 67031      | 27538     | 118118       | 0.202411666      | 0.0937466                                                                    | 18519.8   | 48899             | 0.13951380766513                                                                      | SLIT-ROBO RH GTPase-activating protein 1 O5-Mus-musculus GN-Sncapi Pe-1 Sv-2                                    |
| SCS9A10  | Q6P556    | 1  | 1  | 13015    | 1788      | 10276     | 16250     | 16711     | 15277     | 15328     | NA         | 26523     | NA           | 0.202561621      | 0.093443053                                                                  | 14408     | 20412.667         | 0.5025945788841                                                                       | Zinc transporter ZIP10 O5-Mus-musculus GN-Scs9a10 Pe-1 Sv-1                                                     |
| WIPF3    | P0C7LD-2  | 5  | 5  | 48976    | 49496.2   | 59491     | 28065.6   | 56625.8   | 47187.2   | 51770     | 47519.2    | 86534.46  | 84094        | 0.202703371      | 0.093319028                                                                  | 48530.92  | 63417             | 0.385956425117136                                                                     | Isomorph 2 of WAS/WASL-interacting protein family member 3 O5-Mus-musculus GN-Wipf3                             |
| EXOC6    | Q8R813    | 1  | 1  | NA       | NA        | NA        | 1866      | 2530      | 3451      | 779       | 6844       | 5269      | NA           | 0.203049879      | 0.092398079                                                                  | 1967      | 4130.75           | 0.10634067779127                                                                      | Exocyst complex component 6 O5-Mus-musculus GN-Exoc6 Pe-1 Sv-2                                                  |
| EFT      | PA8024    | 5  | 5  | 96573.25 | 80027     | 74530.25  | 77973.5   | 74959.5   | 69485.75  | 75990     | 14941.75   | 86189.25  | 61913.75     | 0.203163081      | 0.092155221                                                                  | 80819.9   | 61704.2           | 0.383942213550005                                                                     | Eukaryotic translation initiation factor 1 O5-Mus-musculus GN-Eft Pe-2 Sv-2                                     |
| RP129    | PA7415    | 11 | 11 | 99297.27 | 111701.91 | 128844.64 | 61847     | 89337.73  | 87892.27  | 105186.09 | 193176.73  | 153398.27 | 24261.25     | 0.203163081      | 0.091971635                                                                  | 102923.71 | 156451.38         | 0.53164341050771                                                                      | 60S ribosomal protein L29 O5-Mus-musculus GN-Rp129 Pe-2 Sv-2                                                    |
| FDX1L    | Q8CPW2    | 5  | 5  | 3676.8   | 32950.4   | 44879     | 25113.2   | 34048.8   | 34526.6   | 32661.2   | 56032.4    | 43170.8   | 79555.5      | 0.203062524      | 0.091716842                                                                  | 35551.6   | 49189.24          | 0.468428275019469                                                                     | Adrenomedullin-like protein, mitochondrial O5-Mus-musculus GN-Fdx1l Pe-2 Sv-1                                   |
| DENND1A  | Q8K382    | 1  | 1  | 10647    | 12639     | 12673     | 14624     | 14880     | 20347     | 13911     | NA         | 28729     | NA           | 0.203667241      | 0.091077861                                                                  | 13092.6   | 20996             | 0.681362876686173                                                                     | DENN domain-containing protein 1A O5-Mus-musculus GN-Dennd1a Pe-1 Sv-2                                          |
| ABR8     | P50429-12 | 1  | 1  | 39406    | 41846     | 80342     | 36453     | 35186     | 26336     | 32194     | 286120     | 69080     | 198540       | 0.203844712      | 0.090488604                                                                  | 46614.6   | 123897.4          | 0.41029677802305                                                                      | Isomorph 2 of Arylsulfatase O5-Mus-musculus GN-Abr8                                                             |
| USP4     | Q81066    | 2  | 2  | 4401     | 5296      | NA        | 8734.5    | 5814      | 8758      | 8196      | NA         | 6711      | NA           | 0.203909047      | 0.09008919                                                                   | 5989.5    | 7355.333          | 0.34600230306313                                                                      | Inactive ubiquitin carboxyl-terminal hydrolase 34 O5-Mus-musculus GN-Usp4 Pe-2 Sv-2                             |
| ZNF92    | Q70045    | 4  | 4  | 5108     | 4398      | 7574      | 4474      | 4606      | 5474      | 9209      | 8583       | 9209      | 5489.5       | 0.090350985      | 0.090350985                                                                  | 4893      | 4625              | 0.42369381209036                                                                      | Ubiquitin-protein ligase ZNF92 O5-Mus-musculus GN-Znf92                                                         |
| HOMER2   | Q8QW81    | 3  | 3  | 39305.67 | 49325     | 38355.67  | 31782.67  | 45271.33  | 35788.67  | 45408     | 18847      | 59317.33  | 52669.33     | 0.204119816      | 0.090114812                                                                  | 39440.068 | 4067.066          | 0.23331731029033                                                                      | Homeo protein homolog 2 O5-Mus-musculus GN-Homer2 Pe-1 Sv-1                                                     |
| WASF2    | Q88NA6    | 2  | 2  | 10026.5  | 9825      | 5961      | 11313.5   | 11389     | 12233     | 10344     | 9998       | 13439.5   | NA           | 0.204786809      | 0.088926948                                                                  | 9710.5    | 11501.125         | 0.244157499495875                                                                     | Wiskott-Aldrich syndrome protein family member 2 O5-Mus-musculus GN-Wasf2 Pe-1 Sv-1                             |
| ARPC4    | Q80985    | 5  | 5  | 712.5    | 38875.5   | 51827.5   | 41967.5   | 42906     | 45765     | 42906     | 45765      | 42906     | 45765        | 0.204851983      | 0.088725985                                                                  | 47328.478 | 47328.478         | 0.4360212598015963                                                                    | Protein kinase C arrestin repeat protein in vesicle-trafficking focal syndrome homolog O5-Mus-musculus GN-Arpc4 |
| GRSMB5-3 | Q80985-3  | 3  | 3  | 39033.29 | 55127.57  | 44848     | 85439.48  | 60354.29  | 75333.57  | 85395.48  | 57451.86   | 59073.86  | 7454.71      | 0.205661703      | 0.088645578                                                                  | 56960.516 | 58474.858         | 0.308512359765106                                                                     | Isomorph 3 of Cell adhesion molecule 1 O5-Mus-musculus GN-Grsb5-3                                               |
| GAT      | Q88886    | 5  | 5  | 17555.25 | 20262.75  | 25825.5   | 19172.5   | 21238     | 23880     | 23846.75  | 37210.25   | 27954.25  | 27954.25     | 0.205816503      | 0.086519805                                                                  | 20390.5   | 25959.05          | 0.31888922959103                                                                      | 2-aminio-3-ketobutyrate coenzyme A ligase, mitochondrial O5-Mus-musculus GN-Gat Pe-1 Sv-2                       |
| AAK1     | Q3UHW     | 28 | 28 | 47220.48 | 45627.63  | 90086.19  | 35726.59  | 53936.15  | 48024.04  | 54385.59  | 1727876.15 | 57684.15  | 252277.48    | 0.206096791      | 0.08592877                                                                   | 54519.08  | 118049.48         | 0.111454990923865                                                                     | AP2-associated protein kinase 1 O5-Mus-musculus GN-Aak1 Pe-1 Sv-2                                               |
| SHISA4   | Q8K471    | 1  | 1  | 24344    | 5050      | 93488     | 14335     | 15563     | 21556     | 32688     | 56493      | 688288079 | 0.089736448  | 0.086778448      | 162472.2                                                                     | 51011.75  | 0.94276804178504  | Protein shisa-4 O5-Mus-musculus GN-Shisa4 Pe-2 Sv-1                                   |                                                                                                                 |
| AKAP2    | Q3UHW-2   | 27 | 27 | 48731    | 46738     | 93013.86  | 38893     | 58311.62  | 49876.81  | 58484     | 26622.192  | 58484     | 26622.192    | 0.210571382      | 0.089154513                                                                  | 56317.154 | 12095.58          | 0.115891462305813                                                                     | Isomorph 2 of AP2-associated protein kinase 1 O5-Mus-musculus GN-Akap2                                          |
| MKRN2    | Q8EVL1    | 1  | 1  | 20306    | 24363     | 14610     | 20814     | 19978     | 29966     | 22776     | NA         | 46142     | NA           | 0.206486026      | 0.085109335                                                                  | 20014.2   | 32795.333         | 0.71246658730708                                                                      | Probable E3 ubiquitin-protein ligase makorin-2 O5-Mus-musculus GN-Mkrn2 Pe-2 Sv-1                               |
| GPIN     | Q8BUV3    | 13 | 13 | 34679.31 | 38226.46  | 48006.92  | 31776     | 36064     | 38711     | 38746.08  | 48490.85   | 38035.38  | 37938.92     | 0.206927609      | 0.084181516                                                                  | 37394.538 | 44388.446         | 0.233534138921317                                                                     | Gephyrin O5-Mus-musculus GN-Gpin Pe-1 Sv-2                                                                      |
| UTRNA2   | Q61301-3  | 24 | 24 | 22657.37 | 31214.58  | 42882.16  | 54008.68  | 34526.26  | 42517.16  | 42847.63  | 57337.95   | 39757.89  | 47660.32     | 0.207081292      | 0.083458466                                                                  | 38101.81  | 46024.149         | 0.27232729701269                                                                      | Isomorph 3 of Catein alpha-like protein O5-Mus-musculus GN-Utrna2                                               |
| MDM2     | Q19307    | 1  | 1  | 52484.8  | 51722.8   | 98842.8   | 51722.8   | 98842.8   | 51722.8   | 98842.8   | 51722.8    | 98842.8   | 51722.8      | 0.210251683      | 0.08290416                                                                   | 42904.84  | 11882.4           | 0.10782911210297                                                                      | Mouse double-strand break repair protein 1 O5-Mus-musculus GN-Mdm2 Pe-2 Sv-1                                    |
| UBIM2    | PE1087    | 1  | 1  | 122423   | 110133    | 116720    | 143254    | 118334    | 145293    | 118334    | 129733     | 65796     | 116957       | 0.209273455      | 0.083342786                                                                  | 116956.5  | 100043            | 0.27493012868676                                                                      | NEC8-conjugating enzyme Ubc12 O5-Mus-musculus GN-Ubim2 Pe-2 Sv-1                                                |
| PLXNA3   | P70208-2  | 1  | 1  | 5180     | 4652      | 3359      | 8100      | 4718      | 6527      | 6155      | 5532       | 8980      | NA           | 0.207955864      | 0.081024898                                                                  | 5281.8    | 6798.5            | 0.36418679608174                                                                      | Isomorph 2 of Plexin-A3 O5-Mus-musculus GN-Plxna3                                                               |
| TACK1    | Q5J7E8    | 3  | 3  | 8736.33  | 4247      | 8847.67   | 6753      | 9793      | 9671      | 10024.33  | 10129.67   | 13435.67  | 7247.33      | 0.208140884      | 0.080424026                                                                  | 8555.4    | 10101.3           | 0.239676074371593                                                                     | Serine/threonine-protein kinase TAO1 O5-Mus-musculus GN-Tack1 Pe-1 Sv-1                                         |
| USP4     | P50429-12 | 1  | 1  | 42145.67 | 8321.67   | 74069.67  | 81153     | 74069.67  | 81153     | 74069.67  | 81153      | 74069.67  | 81153        | 0.208140884      | 0.080424026                                                                  | 77911.334 | 11882.4           | 0.239676074371593                                                                     | Mouse double-strand break repair protein 1 O5-Mus-musculus GN-Usp4                                              |
| FEBP2    | P45878    | 6  | 6  | 67182.5  | 92842.5   | 97825.5   | 55532     | 66673.17  | 66789.17  | 71986.5   | 133645.5   | 89401.33  | 134544.17    | 0.208517272      | 0.080723448                                                                  | 76009.134 | 130324.93         | 0.4331688765171224                                                                    | Proteoglycan 2-oxo-trans isomerase FBP2 O5-Mus-musculus GN-Febp2 Pe-1 Sv-1                                      |
| CTPS     | P70698    | 1  | 1  | 4964     | 6256      | 2550      | 7689      | 7103      | 8159      | 8525      | 6234       | 6104      | NA           | 0.209136995      | 0.079186995                                                                  | 5712.4    | 7255.5            | 0.344878033610698                                                                     | CTP synthase 1 O5-Mus-musculus GN-Ctps1 Pe-1 Sv-2                                                               |
| WWDC2    | Q6NWD0    | 1  | 1  | 1064     | 1384      | 1186      | 4213      | 2755      | 3804      | 2812      | 5532       | 3226      | NA           | 0.209251761      | 0.0787793                                                                    | 210.4     | 348.06            | 0.68926879900413                                                                      | Protein WWDC2 O5-Mus-musculus GN-Wwdc2 Pe-1 Sv-1                                                                |
| NP21     | Q80923    | 4  | 4  | 2129.6   | 6792.4    | 57245.6   | 4395.2    | 4395.2    | 5102.2    | 4395.2    | 4395.2     | 4395.2    | 4395.2       | 0.209251761      | 0.0787793                                                                    | 210.4     | 348.06            | 0.68926879900413                                                                      | Isomorph 2 of Nucleosome assembly protein 1 O5-Mus-musculus GN-Np21 Pe-1 Sv-3                                   |
| NP21     | Q80923    | 4  | 4  | 2129.6   |           |           |           |           |           |           |            |           |              |                  |                                                                              |           |                   |                                                                                       |                                                                                                                 |

|         |          |     |     |           |           |           |           |           |           |           |           |           |             |              |              |           |           |                  |                                                                                      |                                                                                                          |
|---------|----------|-----|-----|-----------|-----------|-----------|-----------|-----------|-----------|-----------|-----------|-----------|-------------|--------------|--------------|-----------|-----------|------------------|--------------------------------------------------------------------------------------|----------------------------------------------------------------------------------------------------------|
| MYL6    | QB0605   | 12  | 12  | 60648     | 57910.25  | 46073.33  | 75359.5   | 56231.35  | 55040.83  | 57847.25  | 42128.75  | 53450.17  | 22875.42    | 0.222527601  | 0.653134328  | 56880.482 | 46286.484 | Down             | 0.297342713050525                                                                    | Myosin light polypeptide 6 OS-Musculus GN-MyL6 PE-1 Sv-3                                                 |
| TECPRI  | QR0490   | 2   | 2   | 20541.5   | 40961     | NA        | 31400.5   | 45613     | 51807     | 53993.5   | NA        | 33934.5   | NA          | 0.222284302  | 0.6520391207 | 34629     | 34629     | Up               | 0.422768291268582                                                                    | Tectonin beta-provifer repeat-containing protein 1 OS-Musculus GN-Tecpr1 PE-2 Sv-1                       |
| SORBS2  | Q3U172-5 | 8   | 8   | 34345.38  | 33174.75  | 39558.12  | 23332.88  | 33514.75  | 25446.62  | 30379.25  | 102709.62 | 48198.75  | 80065.14    | 0.222431418  | 0.652630869  | 36643.176 | 60952.472 | Up               | 0.74136245424414                                                                     | Isufom 5 of Sorbin and SH3 domain-containing protein 2 OS-Musculus GN-Sorbs2                             |
| SCS     | Q12061   | 3   | 3   | 21514.33  | 30588.33  | 30852.67  | 12046     | 18887     | 15392     | 21148     | 36336.33  | 27963.67  | 82897.33    | 0.222234902  | 0.650278862  | 29777.866 | 30795.265 | Up               | 0.55202804003144                                                                     | Neuroendocrine protein 7B2 OS-Musculus GN-Scs1 PE-1 Sv-1                                                 |
| NDUFV2  | Q00616-2 | 8   | 8   | 47325.5   | 50657.88  | 53864.5   | 61628.25  | 51080.88  | 54666.62  | 48292.88  | 79750.62  | 58933.88  | 6147.12     | 0.222249209  | 0.652636888  | 52011.402 | 60953.472 | Up               | 0.20188781012607                                                                     | Isufom 2 of NADH dehydrogenase (ubiquinone) flavoprotein 2, mitochondrial OS-Musculus GN-NDUFV2          |
| SQTMT1  | Q643137  | 1   | 1   | 151574    | 22016     | 18537     | 28219     | 22447     | 18408     | 19919     | NA        | 14137     | NA          | 0.222587387  | 0.652429878  | 21278.6   | 17488     | Down             | 0.283037927446098                                                                    | Sequitonin OS-Musculus GN-Sqtmt1 PE-1 Sv-1                                                               |
| COBP2   | Q10484   | 1   | 1   | 29486     | 29486     | 29486     | 29486     | 29486     | 29486     | 29486     | 29486     | 29486     | 29486       | 0.222293932  | 0.651203159  | 32508     | 40174     | Up               | 0.13295812361                                                                        | Cytoskeletal-binding protein-related protein 1 OS-Musculus GN-Cobp2 PE-2 Sv-1                            |
| MTL6    | Q60605-2 | 15  | 15  | 41189.33  | 47278.0   | 37797.2   | 5994.6    | 46028.67  | 65128.53  | 3794.25   | 12725.27  | 18303.6   | 22115.8     | 0.222851026  | 0.651355126  | 46447.36  | 37027.728 | Up               | 0.3019034836924                                                                      | Isufom 3 of NADH dehydrogenase (ubiquinone) flavoprotein 2, mitochondrial OS-Musculus GN-MTL6            |
| HP1BP3  | Q3T1A8-3 | 3   | 3   | 37542.67  | 27838     | 23271.33  | 20145     | 37284.67  | 30456     | 31484.67  | 49725.33  | 48211.67  | 20362       | 0.2222929124 | 0.651831391  | 29216.334 | 37248.134 | Up               | 0.35039290094361                                                                     | Isufom 3 of Heterochromatin protein 1-binding protein 3 OS-Musculus GN-HP1BP3                            |
| MOB4    | Q6P186   | 3   | 3   | 2042      | 3855.67   | 2636      | 5913.67   | 3671.33   | 5581.33   | 3769.33   | NA        | NA        | NA          | 0.222951675  | 0.651789261  | 3583.744  | 4636.582  | Up               | 0.37997508881021                                                                     | MOB-like protein p90ten OS-Musculus GN-Mob4 PE-1 Sv-1                                                    |
| ATP5D   | Q02609   | 22  | 22  | 68411.09  | 76420.18  | 67670.64  | 57656.5   | 68622.21  | 65136.36  | 66802.14  | 92112.71  | 70311.18  | 145211.45   | 0.222209511  | 0.651773997  | 67256.528 | 83918.772 | Up               | 0.27781431972989                                                                     | ATP synthase subunit delta, mitochondrial OS-Musculus GN-Atp5d PE-1 Sv-1                                 |
| HYPLA   | Q20498   | 23  | 23  | 54780.1   | 67972.29  | 71046.52  | 59249.57  | 54425.57  | 60025.43  | 61614     | 77081.33  | 61312.62  | 70788.1     | 0.222334441  | 0.651010214  | 66144.268 | 66364.268 | Up               | 0.134000480755177                                                                    | Isufom 1 of NADH dehydrogenase (ubiquinone) flavoprotein 2, mitochondrial OS-Musculus GN-HyplA PE-1 Sv-1 |
| NUMB    | Q9Q253-3 | 5   | 5   | 113949    | 115770.6  | 114671.8  | 61099     | 87144     | 90491     | 101311    | 112101.6  | 141814    | 142929      | 0.223589852  | 0.650547912  | 98646.88  | 119186.11 | Up               | 0.272780700791547                                                                    | Isufom 3 of Protein numb OS-Musculus GN-Numb                                                             |
| MRPS36  | Q9XC08   | 10  | 10  | 214488.5  | 184316.8  | 304529.2  | 74878.6   | 126726    | 142027.5  | 160008    | 388644.5  | 274226.7  | 863295.1    | 0.224035493  | 0.649646748  | 18087.82  | 26580.48  | Down             | 0.55466819203099                                                                     | 28S ribosomal protein S36, mitochondrial OS-Musculus GN-Mrps36 PE-1 Sv-1                                 |
| CEMPV   | Q9K5C4   | 13  | 13  | 44976.5   | 23473     | 88131     | 16090.7   | 31425.8   | 26485.5   | 20787     | 58379     | 14931     | 7306.1      | 0.224214981  | 0.649335373  | 24959.56  | 15069.62  | Down             | 0.727944663882802                                                                    | Centromere protein V OS-Musculus GN-Cempv PE-2 Sv-2                                                      |
| DYNLC12 | Q9P1D0   | 6   | 6   | 19107.8   | 25471     | 26666.8   | 28331     | 24446     | 26968.6   | 31525.8   | 25278.6   | 38952.2   | 54589.2     | 0.225139392  | 0.647211484  | 24804.52  | 32887.12  | Up               | 0.40735848343683                                                                     | Cytoskeletal chain 12 OS-Musculus GN-Dynlc12 PE-1 Sv-2                                                   |
| LDH3A   | Q9D8R2-2 | 18  | 18  | 93251.17  | 108807.72 | 97015.89  | 154660.67 | 97895.72  | 118605.5  | 113104.94 | 44088     | 98033.61  | 65895.56    | 0.224547708  | 0.648691258  | 110326.23 | 83945.527 | Down             | 0.394255061093072                                                                    | Isufom 2 of lactate dehydrogenase (NAD) subunit alpha, mitochondrial OS-Musculus GN-Ldh3A                |
| GLO1    | Q9C9P0   | 3   | 3   | 15120.33  | 21830     | 23688     | 19503.67  | 32784     | 20741.33  | 22582     | 105639    | 31262.67  | 648590496   | 0.224599872  | 0.648590496  | 23387.2   | 46366.666 | Up               | 0.98736845931651                                                                     | Lactoyglutathione lyase OS-Musculus GN-Glo1 PE-1 Sv-3                                                    |
| COT1L   | Q9C9C6   | 6   | 6   | 60007.83  | 66977.33  | 82785.17  | 84438.67  | 55657.17  | 17474.17  | 67010.83  | 90117.5   | 7657.5    | 141768.3    | 0.22465449   | 0.648485556  | 69699.234 | 85396.065 | Up               | 0.28734545610603                                                                     | Cytochrome c oxidase subunit I OS-Musculus GN-Cot1L PE-1 Sv-3                                            |
| TMIM10B | Q9QWV6   | 5   | 5   | 78872.4   | 75052.4   | 105877.8  | 59271.6   | 75258.8   | 71624     | 60059     | 139974.6  | 100677.2  | 655028.6    | 0.22471969   | 0.648485556  | 77566.6   | 102591.72 | Up               | 0.433648913825945                                                                    | Mitochondrial import inner membrane translocase subunit Tim10 B OS-Musculus GN-Tim10B PE-2 Sv-1          |
| NOL3    | Q9D100   | 6   | 6   | 7759.4    | 10182     | 3700.8    | 10451.6   | 8888.6    | 9220.2    | 7292.6    | 3575.8    | 7272      | 1004.1      | 0.22751135   | 0.642997191  | 8192.48   | 5675.96   | Down             | 0.52483283395451                                                                     | Nucleolar protein 3 OS-Musculus GN-Nol3 PE-1 Sv-1                                                        |
| JPH1    | Q9ET77   | 2   | 2   | 10765.5   | 17156.5   | 8380      | 26268     | 21879     | 26275.5   | 24146.5   | 15488.5   | 22866.5   | 5           | 0.227603205  | 0.642821627  | 16829.8   | 22212.25  | Up               | 0.400921941616368                                                                    | Juncophilin 3 OS-Musculus GN-Jph1 PE-1 Sv-1                                                              |
| PLUNE1  | Q9B8V1   | 3   | 3   | 14844     | 17759.33  | 14408.33  | 11913     | 16339.33  | 14547     | 14688     | NA        | 22485.67  | 15873       | 0.22785335   | 0.642434351  | 14692.708 | 17439.918 | Up               | 0.24724055593902                                                                     | Protein p90ten OS-Musculus GN-Plune1 PE-2 Sv-1                                                           |
| HNRNPX  | PE1979-3 | 25  | 25  | 86121.36  | 76004.76  | 55946.48  | 64096.84  | 77291.2   | 68905.16  | 73945.6   | 49036.64  | 64610.48  | 88042.48    | 0.227956488  | 0.642313795  | 71892.528 | 63008.064 | Down             | 0.1925968711554                                                                      | Isufom 3 of heterogeneous nuclear ribonucleoprotein K OS-Musculus GN-HnrnpX                              |
| HTRA1   | Q9R118   | 1   | 1   | 34586     | 62122     | 38319     | 40811     | 32921     | 42451     | 48890     | 101869    | 55660     | NA          | 0.227951224  | 0.642158072  | 41669.8   | 62171.5   | Up               | 0.58178461930548                                                                     | Serine protease HTRA1 OS-Musculus GN-Htra1 PE-1 Sv-2                                                     |
| MYO18A  | Q9QMH9-5 | 36  | 36  | 7099.07   | 12339.86  | 22465.69  | 14104     | 35059.17  | 21077.6   | 15571.69  | 12079.09  | 13211.89  | 0.228095204 | 0.641838364  | 13408.408    | 17290.288 | Up        | 0.36027456134548 | Isufom 5 of Unconventional myosin-XVIIIa OS-Musculus GN-Myo18A                       |                                                                                                          |
| UCF1    | Q5D313   | 3   | 3   | 7680.67   | 7231.67   | 11823.33  | 3467      | 8175.67   | 10276.67  | 11766.33  | 12026.67  | 12665.33  | 0.228127134 | 0.641832656  | 7796.734     | 984.73    | Up        | 0.3991816512886  | Isufom 1 of protein for cytochrome c-binding protein 1 OS-Musculus GN-Ucf1 PE-2 Sv-2 |                                                                                                          |
| SPYCE1  | Q20498   | 23  | 23  | 3040      | 4789      | NA        | 14399     | 14790     | 17374     | 13384     | 14790     | 14790     | NA          | 0.22819367   | 0.64089367   | 3582.751  | 16338.667 | Up               | 0.785400021079372                                                                    | Isufom 2 of protein for cytochrome c-binding protein 1 OS-Musculus GN-Spyce1 PE-1 Sv-1                   |
| FGF1    | PE16148  | 1   | 1   | 74692     | 70504     | 104790    | 29137     | 66284     | 66995     | 57801     | 140591    | 78776     | 185342      | 0.228685371  | 0.640811285  | 60081.4   | 105901    | Up               | 0.61634608653919                                                                     | Fibroblast growth factor 1 OS-Musculus GN-Fgf1 PE-2 Sv-1                                                 |
| SPAST   | Q9QYV8   | 1   | 1   | 43641     | 50115     | 44576     | 40682     | 48484     | 54579     | 45674     | 116582    | 42846     | 61223       | 0.228695705  | 0.640810361  | 45165.6   | 63460.3   | Up               | 0.51095784445993                                                                     | Spastin OS-Musculus GN-Spast PE-1 Sv-1                                                                   |
| MYO2    | Q9D8R2   | 1   | 1   | 25415.5   | 338496    | 388969    | 171366    | 228458    | 444166    | 28456     | 52486     | 24286     | 24286       | 0.228700001  | 0.64046166   | 24286     | 24286     | Up               | 0.64046166                                                                           | Isufom 2 of myosin II OS-Musculus GN-Myo2 PE-2 Sv-2                                                      |
| BUNDC3A | Q80576-3 | 1   | 1   | 40330     | 50975     | 5096      | 18932     | 61398     | 36321     | 44568     | 70915     | 87339     | 0.228805312 | 0.640007216  | 41742.2      | 57586.4   | Up        | 0.46421496357333 | Isufom 3 of RUN domain-containing protein 3A OS-Musculus GN-Bundc3A                  |                                                                                                          |
| RP2     | P25444   | 10  | 10  | 8859.3    | 85824.5   | 102677.3  | 88415.2   | 88849.5   | 80162     | 86304     | 107000.5  | 106796.3  | 310992.2    | 0.229161597  | 0.639858816  | 8745.24   | 130311.18 | Up               | 0.19889359413073                                                                     | 40S ribosomal protein S25 OS-Musculus GN-Rp2 PE-2 Sv-3                                                   |
| TUBA4A  | PE8388   | 82  | 82  | 184173.84 | 216139.47 | 273062.21 | 251156.56 | 292347.86 | 239252.57 | 222132.58 | 235751.25 | 224174.3  | 318164.3    | 0.229269095  | 0.639562805  | 213731.99 | 233171.74 | Up               | 0.114409850565396                                                                    | Tubulin alpha 4A chain OS-Musculus GN-Tuba4a PE-1 Sv-1                                                   |
| HYTH14D | Q43177   | 20  | 20  | 290406.6  | 359469    | 175064.1  | 84878     | 198409.85 | 130084.7  | 14678.25  | 153688.35 | 121034.8  | 150868.7    | 0.22931453   | 0.639568832  | 128269.65 | 141173.45 | Down             | 0.44436869554069                                                                     | Isufom 1 of protein for cytochrome c-binding protein 1 OS-Musculus GN-Hyth14d PE-1 Sv-1                  |
| ATP1A3  | Q9D8R2   | 175 | 175 | 109500.0  | 103831.69 | 116667.78 | 76033.09  | 86753.15  | 100077.26 | 78459.31  | 100533.67 | 105951.46 | 168420.56   | 0.229344097  | 0.640140461  | 98294.64  | 119891.84 | Up               | 0.2757111494931616                                                                   | ATP synthase subunit 3 OS-Musculus GN-Atp1a3 PE-1 Sv-1                                                   |
| SLAIN1  | Q6H877   | 1   | 1   | 16009     | 20219     | 7644      | 10098     | 17148     | 16755     | 17003     | 10821     | 28898     | 24494       | 0.22957676   | 0.639072078  | 14403.6   | 19594.2   | Up               | 0.443597230849109                                                                    | SLAIN motif-containing protein 1 OS-Musculus GN-Slain1 PE-2 Sv-1                                         |
| APMAP   | Q9D709   | 2   | 2   | 23327     | 37536     | 15327     | 36174     | 31050     | 37343     | 39845.5   | 25295.5   | 45966     | 26765.5     | 0.23146623   | 0.6376515    | 23682.8   | 35798.1   | Up               | 0.31969715179007                                                                     | Adipocyte plasma membrane-associated protein OS-Musculus GN-Apmap PE-1 Sv-1                              |
| GS2GA   | Q2N151   | 4   | 4   | 9659      | 13302.75  | 4798.25   | 30163     | 19840.75  | 27340.5   | 31882     | 21825.25  | 21089     | 22947.25    | 0.231797074  | 0.634489162  | 15552.75  | 22402.1   | Up               | 0.52650269110649                                                                     | Glycogen synthase kinase-1 alpha OS-Musculus GN-Gs2ga PE-1 Sv-2                                          |
| SGRP2   | Q9D8R2   | 1   | 1   | 27812.67  | 33912.48  | 42116.75  | 23591.25  | 29725.25  | 37826.75  | 36588     | 46040.88  | 47451.12  | 95956.12    | 0.23187051   | 0.634574812  | 31400.102 | 31400.102 | Up               | 0.665732073116231                                                                    | Isufom 2 of G-protein-coupled receptor 2 OS-Musculus GN-Sgrp2 PE-1 Sv-2                                  |
| FAHD2A  | Q3T172   | 4   | 4   | 30661.25  | 28767.5   | 35679.5   | 17106.25  | 28862.25  | 25581.75  | 31568     | 35551.25  | 33955.5   | 63968.5     | 0.232256678  | 0.633431883  | 28215.45  | 39052.5   | Up               | 0.48150066680808                                                                     | Fumarate hydratase-like hydrolase domain-containing protein 2A OS-Musculus GN-Fahd2 PE-1 Sv-1            |
| NDUFA6  | Q9CQ25   | 12  | 12  | 69831.33  | 66648.08  | 68980.17  | 67184.58  | 67201.42  | 69455.17  | 68375.58  | 55475     | 69892.92  | 45177.25    | 0.232026562  | 0.633179718  | 68599.516 | 61675.184 | Down             | 0.151500828295342                                                                    | NADH dehydrogenase (ubiquinone) 1 alpha subcomplex subunit 6 OS-Musculus GN-NDUFA6 PE-1 Sv-1             |
| LYRM4   | Q8R215   | 3   | 3   | 12873.17  | 109951    | 122817.33 | 77841.67  | 104777.33 | 110431    | 93079.33  | 168358.67 | 131718.67 | 140160.67   | 0.23217319   | 0.63174353   | 10876.2   | 17518.67  | Up               | 0.24839165461687                                                                     | LYRM motif-containing protein 4 OS-Musculus GN-Lyrm4 PE-1 Sv-1                                           |
| MAP2    | Q8R215-2 | 3   | 3   | 9124.33   | 80811     | 13302.75  | 53705.25  | 65121.25  | 67726.25  | 67726.25  | 67726.25  | 67726.25  | 67726.25    | 0.23233307   | 0.63573307   | 121267.12 | 121267.12 | Up               | 0.665732073116231                                                                    | Isufom 2 of microtubule-associated protein 2 OS-Musculus GN-Map2 PE-1 Sv-1                               |
| MKP     | P04370-5 | 56  | 56  | 104631.9  | 843881.27 | 990346.98 | 398252.73 | 874101.41 | 637518.55 | 419248.55 | 74254.02  | 550458.38 | 89607.34    | 0.232814866  | 0.632989292  | 830681.06 | 648445.25 | Down             | 0.357319161134409                                                                    | Isufom 5 of Myelin basic protein OS-Musculus GN-Mkp                                                      |
| PCYOX1  | Q9CQF9   | 6   | 6   | 46586     | 47395     | 74824     | 32380     | 35620.5   | 49210     | 43360     | 55282     | 92809     | 80880       | 0.233023295  | 0.63280155   | 47277     | 87602.2   | Up               | 0.889828610931147                                                                    | Prenylcysteine oxidase OS-Musculus GN-Pcyox1 PE-1 Sv-1                                                   |
| ALDH1A1 | P24      |     |     |           |           |           |           |           |           |           |           |           |             |              |              |           |           |                  |                                                                                      |                                                                                                          |



|         |          |    |    |           |           |           |           |           |           |           |           |           |             |             |             |           |           |                  |                                                                   |                                                                                                       |
|---------|----------|----|----|-----------|-----------|-----------|-----------|-----------|-----------|-----------|-----------|-----------|-------------|-------------|-------------|-----------|-----------|------------------|-------------------------------------------------------------------|-------------------------------------------------------------------------------------------------------|
| TKT     | P40142   | 36 | 36 | 55219.63  | 74554.63  | 76114.71  | 79636.97  | 66689.49  | 70407.74  | 92355.46  | 79421.57  | 71021.69  | 70469.77    | 0.27235478  | 0.64649591  | 70643.086 | 77539.64  | Up               | 0.137694210453643                                                 | Transketolase O5-Mus-musculus GN-Tkt Pe-1 Sv-1                                                        |
| YBP1    | PE1759   | 4  | 4  | 70890.25  | 76267.75  | 137009.5  | 40092.25  | 72543.5   | 62898     | 76660     | 154722.75 | 78797     | 18873.95    | 0.27220361  | 0.564790287 | 79532.45  | 114191.45 | Up               | 0.5218915028515                                                   | Prefoldin subunit 3 O5-Mus-musculus GN-Ybp1 Sv-2                                                      |
| CHAPS   | A23A75.3 | 8  | 8  | 10983.75  | 22199     | 22336.25  | 36614.25  | 24320.75  | 28884.62  | 32950.38  | 28735.38  | 23084.62  | 10372.25    | 0.27208912  | 0.56460746  | 23332.34  | 28684.51  | Up               | 0.29663257318917                                                  | Isomorph 2 of Cytochrome-associated protein 5 O5-Mus-musculus GN-Chaps                                |
| SNQD7   | C3JH05   | 3  | 3  | 8240.33   | 10203.33  | 3646.33   | 2813.33   | 13041     | 23496     | 13786.33  | 17856.33  | 23496     | 15643.99    | 0.27218668  | 0.56461978  | 12650.864 | 18347.583 | Up               | 0.4942919182444                                                   | Sortilin near-27 O5-Mus-musculus GN-Snq7 Pe-1 Sv-1                                                    |
| CRK     | Q64010   | 9  | 9  | 48178.11  | 59117.89  | 53866.78  | 38973.33  | 45758.44  | 48899.78  | 52965.11  | 61449     | 48109.67  | 60918.22    | 0.27268688  | 0.564046778 | 54486.356 | 56466.356 | Up               | 0.14737866022745                                                  | Adaptor molecule crk O5-Mus-musculus GN-Crk Pe-1 Sv-1                                                 |
| PPF     | Q0987    | 9  | 9  | 106550.22 | 102879.11 | 97986.22  | 72851.89  | 97284     | 99428.56  | 94348.33  | 85346.78  | 137851.22 | 134137.56   | 0.27306482  | 0.563734245 | 95509.889 | 110262.49 | Up               | 0.2072008041927                                                   | Peptidyl:prolyl cis-trans isomerase f, mitochondrial O5-Mus-musculus GN-Ppf Pe-1 Sv-1                 |
| PPF2    | Q0987    | 1  | 1  | 50631.37  | 51008.37  | 29970     | 17284     | 20152     | 20152     | 20152     | 20152     | 20152     | 20152       | 0.27306482  | 0.563734245 | 95509.889 | 110262.49 | Up               | 0.2072008041927                                                   | Peptidyl:prolyl cis-trans isomerase f, mitochondrial O5-Mus-musculus GN-Ppf2 Pe-1 Sv-1                |
| AT2B2   | P31830   | 2  | 2  | 679       | 1021      | 1813.5    | 6184      | 2424      | 6460.5    | 2424      | 2424      | 2424      | 2424        | 0.273154509 | 0.564128827 | 2460.4    | 4424      | Up               | 0.844550518459                                                    | Probable abscisicacid-transferring ATPase B O5-Mus-musculus GN-At2b2 Pe-2 Sv-1                        |
| CENPF   | Q0C554-2 | 10 | 10 | 21828.29  | 11056.86  | 1745.29   | 5761.71   | 16192.29  | 12697.43  | 9790.86   | 1977      | 5064.86   | 2142.41     | 0.2736348   | 0.56287887  | 11316.88  | 6334.518  | Down             | -0.83717099252583                                                 | Isomorph 2 of Centromere protein V O5-Mus-musculus GN-Cenpf                                           |
| GDA     | Q08111   | 9  | 9  | 47967.11  | 44321.44  | 42949     | 44188.67  | 36996.44  | 40161.56  | 44316.11  | 38012.78  | 41810.89  | 40867.22    | 0.27386436  | 0.562464425 | 42784.932 | 39683.512 | Down             | -0.0916034983587688                                               | Guanine deaminase O5-Mus-musculus GN-Gda Pe-1 Sv-1                                                    |
| NUDC2B  | Q0C48    | 6  | 6  | 23072     | 20243.4   | 11143.2   | 22424.2   | 25118.8   | 22652.2   | 23432.2   | 19805.8   | 25681.8   | NA          | 0.274142736 | 0.562032352 | 19884.32  | 22890.73  | Up               | 0.2016325863181                                                   | NUC domain-containing protein 2 O5-Mus-musculus GN-Nudc2b Pe-1 Sv-1                                   |
| CHUB2   | P14333   | 1  | 1  | 41333     | 46418     | 44416     | 20407     | 24255     | 19441     | 25130     | 21609     | 39651     | NA          | 0.274163035 | 0.561990316 | 42758.8   | 27155.25  | Down             | 0.39734954660709                                                  | Oral homing subfamily B member 2 O5-Mus-musculus GN-Chub2 Pe-1 Sv-1                                   |
| PODXL2  | Q0C4E    | 3  | 3  | 1079      | 4318.67   | 2688.33   | 6131.33   | 5308.67   | 6642      | 7647.33   | 3905.3    | 5506.8325 | NA          | 0.274270012 | 0.562032352 | 19884.32  | 22890.73  | Up               | 0.2016325863181                                                   | Podocalyxin-like protein 2 O5-Mus-musculus GN-Podxl2 Pe-1 Sv-1                                        |
| ADGR11  | Q0BTR1-2 | 13 | 13 | 15366.08  | 26558.88  | 18958.38  | 37991.77  | 29726.23  | 37201.92  | 38620.85  | 20004.69  | 39399.31  | 29456.15    | 0.274878467 | 0.560059279 | 25720.262 | 31854.584 | Up               | 0.308595658130312                                                 | Isomorph 2 of Latrophilin 1 O5-Mus-musculus GN-Lgtn1                                                  |
| SEPT6   | Q0Q1T4-3 | 14 | 14 | 8777.57   | 9309.57   | 10492.71  | 91530.21  | 90115.07  | 85096.43  | 90886.71  | 104426.76 | 91935.71  | 17533.86    | 0.27488154  | 0.560844039 | 92589.626 | 112215.76 | Up               | 0.27735279148735                                                  | Isomorph 7 of Septin-6 O5-Mus-musculus GN-Sept6                                                       |
| WME1    | P15333   | 13 | 13 | 8581.85   | 13450.85  | 76912.08  | 157994    | 89300.38  | 104985.72 | 103849.62 | 83238.08  | 83231.77  | 86445.77    | 0.275238405 | 0.560309088 | 159231    | 82314.203 | Down             | 0.352093951130132                                                 | Nucleoside diphosphate kinase A O5-Mus-musculus GN-Wme1 Pe-1 Sv-1                                     |
| CAMK4   | P08414   | 10 | 10 | 93645.4   | 25084.5   | 16480     | 31905.5   | 27461     | 28605     | 34328.75  | 14544     | 29325     | 54575       | 0.275256094 | 0.560363057 | 24059.1   | 32495.95  | Up               | 0.435888455454301                                                 | Calcium/calmodulin-dependent protein kinase type IV O5-Mus-musculus GN-Camk4 Pe-1 Sv-2                |
| HPCA    | P84075   | 4  | 4  | 92655.25  | 106566.75 | 102003    | 159490.5  | 123901.25 | 122567.75 | 161205.25 | 153444    | 98810.5   | 218986.75   | 0.275813969 | 0.559383742 | 116982.35 | 140883.5  | Up               | 0.31064577265119                                                  | Neuron-specific calcium-binding protein hippocampus O5-Mus-musculus GN-Hpca Pe-1 Sv-2                 |
| MACROD1 | Q0Z821   | 3  | 3  | 7024.67   | 13175     | 4134      | 21669.33  | 15571     | 18708.33  | 14463     | NA        | 16873.33  | NA          | 0.276727927 | 0.55794701  | 12558.8   | 16664.887 | Up               | 0.41042122151558                                                  | O-acetyl-ADP-ribose deacetylase MACROD1 O5-Mus-musculus GN-Macrodi1 Pe-1 Sv-2                         |
| SHG4    | C10J09   | 1  | 1  | 57567     | 64064     | 127083    | 12784     | 53268     | 44798     | 61235     | 92137     | 350574    | 0.276740046 | 0.557204066 | 65312.8     | 136517    | Up        | 1.0642597278655  | Protein shg4 homolog O5-Mus-musculus GN-Shg4 Pe-1 Sv-1            |                                                                                                       |
| HDOX1   | Q0B85    | 1  | 1  | 12779     | 15098     | 32996     | 11692     | 21295     | 13057     | 20581     | 50922     | 37699     | NA          | 0.276940042 | 0.557607723 | 18872     | 30584.75  | Up               | 0.695621443143311                                                 | Protein Hook homolog 1 O5-Mus-musculus GN-Hook1 Pe-1 Sv-2                                             |
| DES     | P31001   | 1  | 1  | 72858     | 73358     | 47854     | 72005     | 65829     | 67773     | 55831     | NA        | 44555     | NA          | 0.277311469 | 0.557314609 | 66416.8   | 56053.333 | Down             | -0.2447480460501134                                               | Desmin O5-Mus-musculus GN-Des Pe-1 Sv-1                                                               |
| BOCR5   | Q0R020   | 1  | 1  | 72494     | 71149     | 67433     | 56505     | 67286     | 67827     | 79521     | 217832    | 122031    | 47200       | 0.277175979 | 0.55724441  | 68699.4   | 106888    | Up               | 0.64774128661808                                                  | Isomorph of heterozygous 12 chromosomal region 1 protein homolog O5-Mus-musculus GN-Hs12cr1 Sv-2      |
| BN2     | D32029   | 5  | 5  | 13627.8   | 40504.75  | 119376.4  | 47851.75  | 489314.5  | 40975     | 55095.5   | 280226.25 | 41541.25  | 89325.25    | 0.277265089 | 0.556417168 | 41511.65  | 125665.65 | Down             | 0.344802653020926                                                 | Bridging integrator 2 O5-Mus-musculus GN-Bn2 Pe-1 Sv-1                                                |
| PSMD4   | Q35226-3 | 9  | 9  | 6802.38   | 73175.12  | 89657.75  | 39021.75  | 69211.5   | 57589.5   | 62661.5   | 105029    | 76974.62  | 138634      | 0.277765443 | 0.556121474 | 67853.9   | 88497.724 | Up               | 0.37994511837783                                                  | Isomorph Rpn10 of 26S proteasome non-ATPase regulatory subunit 4 O5-Mus-musculus GN-Psm4              |
| CHMP3   | Q0C10    | 1  | 1  | 67343     | 78594     | 109772    | 28774     | 66483     | 39297     | 57086     | 153020    | 99874     | 29106       | 0.277780031 | 0.556619888 | 13213     | 128476.6  | Up               | 0.871280544474292                                                 | Charged multivesicular body protein 3 O5-Mus-musculus GN-Chmp3 Pe-1 Sv-1                              |
| ABR1    | Q0B9W6   | 2  | 2  | 12429.5   | 12753.5   | 5516      | 20080     | 21295     | 19453     | 19615.1   | NA        | 17765     | NA          | 0.277812822 | 0.556474004 | 15278.8   | 18844.5   | Up               | 0.31025726702679                                                  | Beta-arrestin 1 O5-Mus-musculus GN-Abr1 Pe-1 Sv-1                                                     |
| ACAD8   | Q0D81    | 2  | 2  | 19287     | 21693.5   | 56505     | 5830.5    | 22780     | 19378     | 23310.5   | 66939.5   | 3393.5    | 55384       | 0.277888499 | 0.556129598 | 25173.7   | 39964     | Up               | 0.65216565545152                                                  | Putidaredoxin chain specific acyl-CoA dehydrogenase, mitochondrial O5-Mus-musculus GN-Acad8 Pe-1 Sv-1 |
| INPACT  | P05047   | 1  | 1  | 13693     | 13794     | 27096     | 27096     | 27096     | 27096     | 27096     | 27096     | 27096     | 27096       | 0.277908031 | 0.556129598 | 25173.7   | 39964     | Up               | 0.65216565545152                                                  | Protein inpact homolog O5-Mus-musculus GN-Inpact Pe-1 Sv-2                                            |
| ATF7    | Q0B9W3   | 2  | 2  | 7863.5    | 10099     | 1979      | 6171.5    | 9905.5    | 7044.5    | 10333.5   | NA        | 11332.5   | NA          | 0.278146362 | 0.555708779 | 7203.7    | 9566.833  | Up               | 0.4091033638117                                                   | Atf7phosphin O5-Mus-musculus GN-Atf7 Pe-1 Sv-1                                                        |
| PCCB    | Q099M9   | 3  | 3  | 32104     | 42527.67  | 15085.33  | 34036.33  | 38116.33  | 45418.33  | 41812     | 22447     | 40157.33  | 51207       | 0.278225224 | 0.555607714 | 32382.932 | 40028.332 | Up               | 0.432260783144977                                                 | Pogonin-CoA carboxylase beta chain, mitochondrial O5-Mus-musculus GN-Pccb Pe-1 Sv-2                   |
| ATP8B   | P13629   | 7  | 7  | 13653.29  | 113362.71 | 90719.29  | 142968.71 | 90719.29  | 142968.71 | 16849.29  | 28084.44  | 143622.71 | 236888.44   | 0.278289167 | 0.545408516 | 143622.71 | 236888.44 | Up               | 0.545408516                                                       | ATP synthase subunit 8, mitochondrial O5-Mus-musculus GN-Atp8b Pe-1 Sv-2                              |
| TRCA    | Q0D165   | 6  | 6  | 33126.67  | 39824     | 48870.16  | 30282.67  | 44714.5   | 48302.67  | 33272     | 87314.16  | 42754.17  | 45123.8     | 0.27838353  | 0.554402384 | 38663.602 | 49338.168 | Up               | 0.365166847471704                                                 | Tubulin-folding cofactor 8 O5-Mus-musculus GN-Trca Pe-1 Sv-2                                          |
| MRP11   | Q099M6   | 1  | 1  | 79154     | 99120     | 81953     | 45636     | 66015     | 64488     | 62843     | 137379    | 70172     | NA          | 0.27844223  | 0.54544223  | 7037.5    | 132358.5  | Up               | 0.83155063066828                                                  | ATP ribosomal protein L1, mitochondrial O5-Mus-musculus GN-Mrp11 Pe-1 Sv-2                            |
| PTMS    | Q0D018   | 2  | 2  | 71421     | 79826     | 59122     | 120266.5  | 62303     | 91280     | 66001     | 22645.5   | 82787     | 23860       | 0.279201026 | 0.554082929 | 78567.7   | 573417    | Down             | -0.455031120408774                                                | Parathymosin O5-Mus-musculus GN-Ptms Pe-1 Sv-2                                                        |
| NEFL    | P19446   | 1  | 1  | 53401     | 5008      | 2488      | 4008      | 4433      | 4138      | 9686      | 4744      | NA        | 0.279689621 | 0.553891951 | 3979.8      | 57475     | Up        | 0.52897353110453 | Nucleosome elongation factor C O5-Mus-musculus GN-Neffl Pe-1 Sv-2 |                                                                                                       |
| ATP10A  | Q0B9W6   | 6  | 6  | 70174.29  | 72802     | 26912.29  | 42098.67  | 29510     | 33433     | 39054.67  | 327973.67 | 30564.67  | 327973.67   | 0.279689621 | 0.553891951 | 3979.8    | 57475     | Up               | 0.52897353110453                                                  | ATP synthase subunit 10, mitochondrial O5-Mus-musculus GN-Atp10a Pe-1 Sv-2                            |
| STP1    | Q06084   | 26 | 26 | 1305.632  | 120155.31 | 119276.15 | 84324.62  | 120493.5  | 103332.92 | 110615.73 | 142797.38 | 145455.08 | 142824.77   | 0.28001714  | 0.552675821 | 14495.64  | 129905.38 | Up               | 0.16522263275877                                                  | Stress-induced-phosphoprotein 1 O5-Mus-musculus GN-Stp1 Pe-1 Sv-1                                     |
| HA1     | P07724   | 43 | 43 | 69916.44  | 71607     | 65729.07  | 80393.28  | 84800.98  | 74377.05  | 85314.77  | 41965.12  | 70943.65  | 42398.56    | 0.280094399 | 0.551766233 | 74494.494 | 43011.57  | Down             | -0.24065487110609                                                 | Serum albumin O5-Mus-musculus GN-Ha1 Pe-1 Sv-3                                                        |
| KHRP    | C10J01   | 8  | 8  | 45127.12  | 34114.38  | 41907.88  | 20285.88  | 40970.75  | 28857.25  | 30584.88  | 12711.62  | 42606.75  | 24843       | 0.28073571  | 0.551687393 | 36485.202 | 29550.7   | Down             | 0.30411013573558                                                  | Actin upstream element-binding protein 2 O5-Mus-musculus GN-Khrp Pe-1 Sv-2                            |
| PL2     | P12170   | 25 | 25 | 97790.28  | 94035     | 140575.2  | 77781.95  | 99299.78  | 75871.08  | 155029.68 | 155029.68 | 155029.68 | 155029.68   | 0.28073571  | 0.551687393 | 36485.202 | 29550.7   | Down             | 0.30411013573558                                                  | Actin upstream element-binding protein 2 O5-Mus-musculus GN-Khrp Pe-1 Sv-2                            |
| ALDA    | Q0C4E    | 3  | 3  | 202       | 10728     | NA        | 971       | 912       | 2124      | 785       | NA        | 1524      | NA          | 0.281925499 | 0.549856542 | 915.75    | 1477.667  | Up               | 0.690295160735549                                                 | Actin intermediate, desaralization-associated protein O5-Mus-musculus GN-Ala Pe-1 Sv-1                |
| NAPG    | Q0C2W7   | 54 | 54 | 54153.18  | 51071.92  | 54296.64  | 44950.28  | 53079.28  | 49711.36  | 51366.48  | 55823.02  | 58119.52  | 57909.38    | 0.282126516 | 0.549144276 | 51238.184 | 54225.912 | Up               | 0.0817641321888765                                                | Gamma-soluble NSF attachment protein O5-Mus-musculus GN-Napg Pe-1 Sv-2                                |
| VDAC1   | Q60911   | 15 | 15 | 91131.33  | 79805.87  | 142614.4  | 89958.67  | 82807.6   | 100791.73 | 90386.87  | 13602.33  | 39772.8   | 181629.73   | 0.282269031 | 0.549118502 | 9217.014  | 12128.137 | Up               | 0.318470598909032                                                 | Voltage-dependent anion-selective channel protein 1 O5-Mus-musculus GN-Vdac1 Pe-1 Sv-1                |
| NUC2D3  | P14333   | 13 | 13 | 8581.85   | 13450.85  | 76912.08  | 157994    | 89300.38  | 104985.72 | 103849.62 | 83238.08  | 83231.77  | 86445.77    | 0.282269031 | 0.549118502 | 9217.014  | 12128.137 | Up               | 0.318470598909032                                                 | Voltage-dependent anion-selective channel protein 1 O5-Mus-musculus GN-Vdac1 Pe-1 Sv-1                |
| RPL8    | P62918   | 20 | 20 | 10856.45  | 91993.45  | 159205.15 | 84631.45  | 104886.75 | 97885.8   | 120651.95 | 160206.7  | 145922.05 | 143703.6    | 0.283051391 | 0.548134706 | 115469.95 | 132524.04 | Up               | 0.228474196545941                                                 | 60S ribosomal protein L8 O5-Mus-musculus GN-Rpl8 Pe-2 Sv-2                                            |
| SPAL1   | Q0C0T5   | 22 | 22 | 39895.35  | 45951.73  | 46187.32  | 37876.77  |           |           |           |           |           |             |             |             |           |           |                  |                                                                   |                                                                                                       |

|             |             |    |    |           |           |           |           |           |           |            |           |           |             |             |             |           |           |                                                                           |                                                                                                     |
|-------------|-------------|----|----|-----------|-----------|-----------|-----------|-----------|-----------|------------|-----------|-----------|-------------|-------------|-------------|-----------|-----------|---------------------------------------------------------------------------|-----------------------------------------------------------------------------------------------------|
| HEAR        | P20060      | 3  | 3  | 106372    | 117990.67 | 215245    | 118586.67 | 81570     | 120249.33 | 1220077.67 | 139272.67 | 321513.67 | 0.30486991  | 0.515846981 | 120594.27   | 176936.67 | Up        | Beta-hexosaminidase subunit beta O5-Mus-musculus Gm-HexB Pe1-1 Sv-2       |                                                                                                     |
| MTOT1       | Q02832      | 1  | 1  | 1414      | 4081      | NA        | 6748      | 5062      | 6012      | 5119       | NA        | 6018      | NA          | 0.51495862  | 0.51495862  | 4326.25   | 5766.333  | Up                                                                        | Protein MTOT1 homolog, mitochondrial O5-Mus-musculus Gm-Mtot Pe-2 Sv-1                              |
| GPC5D       | Q02830      | 2  | 2  | 1778      | 6108      | 1112.5    | 8920      | 8493.5    | 12497     | 10439.5    | NA        | 3661.5    | NA          | 0.305673991 | 0.514715555 | 5094.4    | 8282.6667 | Up                                                                        | G protein-coupled receptor family G group 5 member 8 O5-Mus-musculus Gm-GprG5 Pe-2 Sv-1             |
| UBNVA       | Q08076      | 1  | 1  | 1138      | NA        | 3337      | 1644      | 2140      | 3070      | 3051       | 9817      | 10500     | NA          | 0.305883127 | 0.514500555 | 2112.5    | 4407      | Up                                                                        | UBX domain-containing protein 4 O5-Mus-musculus Gm-UBX Pe-1 Sv-1                                    |
| EFBH        | Q01926      | 1  | 1  | 49365     | 52108     | 87442     | 41656     | 34660     | 40658     | 44034      | 105651    | 59245     | 114978      | 0.306208584 | 0.514328007 | 53130.2   | 73995.4   | Up                                                                        | Eukaryotic translation initiation factor 3 subunit H O5-Mus-musculus Gm-eIF3H Pe-1 Sv-1             |
| BIN1        | Q08139-2    | 33 | 33 | 101709.55 | 112340.58 | 85312     | 146574.18 | 124593.88 | 117794.82 | 111664.42  | 79034.61  | 115653.79 | 50504.73    | 0.306231928 | 0.513949531 | 114106.04 | 95516.474 | Down                                                                      | Isomorph 2 of Myc box-dependent-interacting protein 1 O5-Mus-musculus Gm-Bin1                       |
| PTP7D       | Q01924      | 1  | 1  | 7319      | 10095.24  | 17181     | 37319     | 21180     | 21181     | 21180      | 181630    | 86362     | 191652      | 0.306236972 | 0.513949531 | 14284     | 92536.3   | Up                                                                        | Isomorph 2 of PTP7D-prolyl cis-trans isomerase 1 O5-Mus-musculus Gm-Ptp7D                           |
| ANXA6       | E14324      | 6  | 6  | 24478     | 30186     | 36332     | 32393.67  | 32703     | 38813.3   | 31861.5    | 11351.1   | 27023.67  | 14731.83    | 0.306319127 | 0.513722816 | 29134.334 | 23352.2   | Up                                                                        | Annexin A6 O5-Mus-musculus Gm-Annx6 Pe-1 Sv-1                                                       |
| NAMPT       | Q09524      | 1  | 1  | 761       | 1050      | 1312      | 2504      | 2015      | 2897      | 2471       | NA        | 9343      | 0.306348058 | 0.513588536 | 1888.4      | 4901.6667 | Up        | Nicotinamide phosphoribosyltransferase O5-Mus-musculus Gm-Nampt Pe-1 Sv-1 |                                                                                                     |
| HIST1H1A    | P08433      | 10 | 10 | 650763.11 | 187949.33 | 279286.22 | 51264.72  | 302791.44 | 149777.88 | 129613.78  | 243768.78 | 251426.78 | 146081.78   | 0.306337768 | 0.513516015 | 316210.46 | 200732.4  | Down                                                                      | Histone H3.1 O5-Mus-musculus Gm-Hist1H1A Pe-1 Sv-2                                                  |
| RBMX        | Q02900-2    | 4  | 4  | 64612     | 69007     | 26392     | 55881     | 41704.75  | 44605.5   | 3275.5     | 10270.5   | 44474.75  | NA          | 0.306381316 | 0.513173759 | 45157.2   | 13385.061 | Up                                                                        | RNA-binding motif protein, X chromosome O5-Mus-musculus Gm-RbmX Pe-1 Sv-1                           |
| AKS1        | P44664      | 4  | 4  | 74        | 64921.75  | 62008.75  | 46700.75  | 48710.25  | 52486.75  | 57909.5    | 91720     | 60531.25  | 4070.75     | 0.513074446 | 0.514901546 | 5454.98   | 44609.05  | Up                                                                        | Adenosuccinate synthetase isozyme 2 O5-Mus-musculus Gm-Aks1 Pe-1 Sv-1                               |
| NCX1        | BLA10.1-2   | 2  | 2  | 499       | NA        | NA        | 2604      | 1353      | 2778.5    | 10258      | NA        | 3513      | NA          | 0.312304411 | 0.513394111 | 1485.3333 | 2750      | Up                                                                        | Isomorph 3 of Transcriptional repressor NF-X1 O5-Mus-musculus Gm-Nfx1                               |
| GNAO1       | P18872-2    | 31 | 31 | 54825.39  | 95437.45  | 87938.74  | 158243.03 | 96891.35  | 132026    | 149764.16  | 99134.94  | 87017.48  | 138425.81   | 0.307485175 | 0.512175535 | 98667.192 | 112127.68 | Up                                                                        | Isomorph Alpha-2 of Guanine nucleotide-binding protein G0i subunit Alpha O5-Mus-musculus Gm-Gnao1   |
| EC2         | Q09WR2      | 6  | 6  | 13719     | 19643.17  | 29779.17  | 13947.33  | 23853.67  | 12929.13  | 21214.17   | 22074     | 24504.17  | 42091.33    | 0.510863021 | 0.510863021 | 20188.8   | 25829.034 | Up                                                                        | Enoyl-CoA dehydratase 2, mitochondrial O5-Mus-musculus Gm-Eno2 Pe-1 Sv-2                            |
| P20026402R1 | Q09WR5      | 2  | 2  | 23598.5   | 26502.5   | 15970     | 24481.5   | 30905.5   | 31613.5   | 25297      | NA        | 31890.5   | NA          | 0.309199104 | 0.509199104 | 25523.2   | 28666.667 | Up                                                                        | Phosphatidylinositol 3,4,5-trisubstrate 5-phosphatase 1 O5-Mus-musculus Gm-Pip3K1 Pe-1 Sv-1         |
| ALDH4A1     | Q08C70      | 5  | 5  | 34713.4   | 34237     | 29747.8   | 28530.4   | 28394     | 31552.2   | 31166      | 23693.2   | 33077.4   | 3187.2      | 0.309138025 | 0.509845753 | 31124.52  | 24535.3   | Down                                                                      | Delta-1-pyrroline-5-carboxylate dehydrogenase, mitochondrial O5-Mus-musculus Gm-Aldehyde1 Pe-1 Sv-1 |
| TAOK3       | Q08VC6      | 2  | 2  | 1219      | 14085     | 692       | 3597      | 3529.5    | 3632      | 2944       | 3084.5    | 1864      | NA          | 0.509842274 | 0.509842274 | 2089      | 2881.125  | Up                                                                        | Serine/threonine-protein kinase TAOK3 O5-Mus-musculus Gm-Taok3 Pe-1 Sv-2                            |
| CDX1        | Q78317      | 1  | 1  | 55378     | 48157     | 13122     | 58843     | 54781     | 50380     | 65565      | 28464     | 18843     | NA          | 0.309444436 | 0.509417322 | 57676.2   | 40813     | Up                                                                        | Chromobox protein HOM1 O5-Mus-musculus Gm-Cbx1 Pe-1 Sv-1                                            |
| P20026402R2 | Q08V15      | 4  | 4  | 26531     | 41870.67  | 20813.33  | 4307      | 44138     | 52265.67  | 67373.33   | 25915     | 43039.67  | NA          | 0.308856777 | 0.508856777 | 35276     | 46648.418 | Up                                                                        | Ubiquitin thioesterase OTUB1 O5-Mus-musculus Gm-Otub1 Pe-1 Sv-1                                     |
| OTUB1       | Q78317      | 4  | 4  | 26531     | 41870.67  | 20813.33  | 4307      | 44138     | 52265.67  | 67373.33   | 25915     | 43039.67  | NA          | 0.308856777 | 0.508856777 | 35276     | 46648.418 | Up                                                                        | Ubiquitin thioesterase OTUB1 O5-Mus-musculus Gm-Otub1 Pe-1 Sv-1                                     |
| MRPS11      | Q08C42      | 1  | 1  | 88886     | 105014    | 93565     | 114821    | 98041     | 104751    | 107614     | 172716    | 121992    | 87263       | 0.310325726 | 0.508308182 | 100065.4  | 118886.2  | Up                                                                        | 28S ribosomal protein S11, mitochondrial O5-Mus-musculus Gm-Mrps11 Pe-1 Sv-2                        |
| EN5A        | P06840-3    | 1  | 1  | 61006     | 51211     | 58735     | 52210     | 59031     | 76087     | 96100      | 17429     | 45477     | NA          | 0.310492912 | 0.507869563 | 62892.6   | 78712.25  | Up                                                                        | Isomorph 3 of Alpha-enolase O5-Mus-musculus Gm-En5a                                                 |
| ESD2        | P09071      | 1  | 1  | 94093     | 109028    | 155284    | 43021.8   | 86117.4   | 72478.8   | 76382.4    | 213039.8  | 93176     | 295478      | 0.310558236 | 0.507356543 | 80394.24  | 150191.92 | Up                                                                        | Superoxide dismutase [Mn], mitochondrial O5-Mus-musculus Gm-Esd2 Pe-1 Sv-3                          |
| AK2         | Q09V76      | 15 | 15 | 68971.27  | 72476.8   | 68946.87  | 51808.2   | 70227.67  | 65377.78  | 72052      | 77451.07  | 70919.47  | 65486.67    | 0.310710717 | 0.507464532 | 66486.162 | 71459.788 | Up                                                                        | Adenylyl kinase 2, mitochondrial O5-Mus-musculus Gm-Ak2 Pe-1 Sv-5                                   |
| EPN2        | Q08C43-2    | 5  | 5  | 26155     | 27773.2   | 36180.2   | 17834     | 25911.8   | 22990     | 24107.6    | 11642     | 39464.8   | NA          | 0.311809659 | 0.506110436 | 26787.24  | 32052.08  | Up                                                                        | Isomorph 2 of Epsin-2 O5-Mus-musculus Gm-Epn2                                                       |
| ITPA        | Q02082      | 9  | 9  | 80582.31  | 96852.22  | 158927.22 | 56168.78  | 101656.44 | 84281.11  | 97222.89   | 144180.22 | 172025.44 | 185014.11   | 0.311028572 | 0.505750272 | 98891.398 | 125586.75 | Up                                                                        | Isomorph 1 of Inosine triphosphatase O5-Mus-musculus Gm-Itppa Pe-1 Sv-2                             |
| CHMP2A      | Q08D34      | 8  | 8  | 29355     | 34375.38  | 31452.25  | 28874     | 25669.75  | 27104.5   | 25863.88   | 37355.25  | 27680.88  | NA          | 0.504052088 | 0.504052088 | 27546.876 | 35956.376 | Up                                                                        | Coiled-coil multivesicular body protein 2a O5-Mus-musculus Gm-Chmp2A Pe-1 Sv-1                      |
| PP2R2       | Q02018      | 1  | 1  | 54719.87  | 48480.33  | 73703.33  | 53270     | 53750.33  | 52486.75  | 76077      | 94263.83  | 52343.24  | 65045.864   | 0.503748916 | 0.503748916 | 42341.24  | 65045.864 | Up                                                                        | Protein phosphatase 2A O5-Mus-musculus Gm-Pp2r2 Pe-1 Sv-1                                           |
| QCRF51      | Q08C68      | 17 | 17 | 90934.38  | 98161.94  | 108445    | 71029.56  | 79316     | 84248.31  | 76762.56   | 135462.5  | 92070.56  | 148908.06   | 0.503754695 | 0.503754695 | 89583.788 | 107636.3  | Up                                                                        | Cytochrome b-c1 complex subunit Rieske, mitochondrial O5-Mus-musculus Gm-Qcrf51 Pe-1 Sv-1           |
| TCZAL1      | Q08D05      | 1  | 1  | 17961     | 20408     | 9782      | 27014     | 19216     | 19668     | 18797      | NA        | 26281     | 0.503662881 | 0.503662881 | 18884.4     | 33403.25  | Up        | Transcription elongation factor 1A, O5-Mus-musculus Gm-Tczal1 Pe-1 Sv-1   |                                                                                                     |
| EPD7D       | Q08C70-2    | 3  | 3  | 36509.67  | 49396     | 29730.33  | 36071.68  | 38361.29  | 32614.68  | 39626.33   | 62408     | 39626.33  | 62408       | 0.503662881 | 0.503662881 | 36686.066 | 43493.298 | Up                                                                        | Isomorph 1 of Centronexin protein 1 O5-Mus-musculus Gm-Epd7D                                        |
| LOMPL       | Q08C63      | 4  | 4  | 16270.55  | 14913.75  | 11488.25  | 16860.5   | 20436     | 17112     | 14890.74   | 9427.25   | 14609     | 5125        | 0.503452304 | 0.503452304 | 15987.8   | 12883.2   | Down                                                                      | Non protease homolog, mitochondrial O5-Mus-musculus Gm-Lompl Pe-1 Sv-1                              |
| TUBA1C      | P08373      | 83 | 83 | 182336.02 | 232106.54 | 231350.32 | 195958.54 | 234726.54 | 244782.54 | 222339.32  | 229347.32 | 228315.16 | 0.314538388 | 0.502326265 | 216700.56   | 231202.37 | Up        | Tubulin alpha-1C chain O5-Mus-musculus Gm-Tuba1c Pe-1 Sv-1                |                                                                                                     |
| CDKN1B      | P46414      | 2  | 2  | 13076     | 13324.5   | 18253     | 12894     | 14827.5   | 16880     | 16948.5    | 13093.5   | 17084.5   | NA          | 0.314703715 | 0.502098133 | 14493     | 16001.625 | Up                                                                        | Cyclin-dependent kinase inhibitor 1B O5-Mus-musculus Gm-Cdkn1b Pe-1 Sv-2                            |
| DOXA        | Q09K63      | 1  | 1  | 7295      | 99898     | 1788      | 2892      | 1780      | 5599      | 2192       | NA        | 6302      | NA          | 0.314724545 | 0.502009847 | 24488     | 3864.3333 | Up                                                                        | Docking protein 4 O5-Mus-musculus Gm-Doxa Pe-1 Sv-1                                                 |
| RC3H2       | P20026402R1 | 25 | 25 | 17389     | 30963.5   | 18912     | 49642     | 18480.49  | 38039.5   | 18226.5    | 16324.49  | 20784.49  | 11238.12    | 0.501951516 | 0.501951516 | 20099     | 20099.384 | Up                                                                        | Isomorph 1 of Ubiquitin-protein ligase complex O5-Mus-musculus Gm-Rc3h2 Pe-2 Sv-1                   |
| RG58        | Q08V71      | 1  | 1  | 11172     | 10349     | 3964      | 15537     | 12451     | 14912     | 12767      | NA        | 11478     | NA          | 0.316777754 | 0.499243525 | 10694.6   | 13502.333 | Up                                                                        | Regulator of G-protein signaling 8 O5-Mus-musculus Gm-Rg58 Pe-2 Sv-1                                |
| CACNA1C     | Q01815-3    | 2  | 2  | 1070      | 1062      | NA        | 3222      | 21080     | 3272      | 2387       | NA        | 2081      | NA          | 0.316807381 | 0.495210193 | 1831.5    | 2504      | Up                                                                        | Isomorph 3 of Voltage-dependent L-type calcium channel subunit alpha-1C O5-Mus-musculus Gm-Cacna1c  |
| MTF2        | Q01915      | 2  | 2  | 3797.1    | 2527.5    | NA        | 4331.5    | 2310.5    | 2787      | 2002.5     | NA        | 513       | NA          | 0.31698185  | 0.498950604 | 2841.75   | 1833.1    | Up                                                                        | Translation initiation factor IF-2, mitochondrial O5-Mus-musculus Gm-Mtf2 Pe-1 Sv-2                 |
| QCRF52      | Q08C68      | 1  | 1  | 24613     | 29232     | 34483     | 12125     | 30935     | 34095     | 34095      | 31622     | 34494     | 63264       | 0.501951516 | 0.501951516 | 20099     | 20099.384 | Up                                                                        | Protein phosphatase 2A O5-Mus-musculus Gm-Qcrf52 Pe-1 Sv-1                                          |
| PP2R1       | P20108      | 1  | 1  | 21327     | 30532.33  | 27709.33  | 60686.33  | 43446     | 40326.67  | 40051.33   | 24615     | 20926     | NA          | 0.317734555 | 0.497734555 | 40158.998 | 31709.75  | Down                                                                      | Threonine-dependent peroxide reductase, mitochondrial O5-Mus-musculus Gm-Pp2r1 Pe-1 Sv-1            |
| PRRT1       | Q35449      | 1  | 1  | 17450     | 21028     | 37630     | 8710      | 12624     | 10044     | 10707      | 73674     | 28618     | 47720       | 0.318014985 | 0.497515541 | 19000.4   | 34237.2   | Up                                                                        | Protein-rich transmembrane protein 1 O5-Mus-musculus Gm-Prtr1 Pe-1 Sv-1                             |
| OSTN        | Q09H95      | 18 | 18 | 167083.81 | 154154.89 | 172727.5  | 151044.78 | 140514.76 | 171921.72 | 174176.72  | 129882.83 | 167338.83 | 0.318078121 | 0.497481987 | 157931.13   | 140512.01 | Down      | Isomorph 1 of Osteonectin O5-Mus-musculus Gm-Ostn Pe-1 Sv-1               |                                                                                                     |
| PCP2D       | Q08D31      | 2  | 2  | 46781.29  | 48851.3   | 38421.3   | 68013.3   | 68013.3   | 47181.2   | 53469.31   | 4741.04   | 12765.83  | 42110.08    | 0.318125131 | 0.497211362 | 47110.08  | 38214.16  | Up                                                                        | Calcium ion subunit 8, type 1 O5-Mus-musculus Gm-Pcp2d Pe-1 Sv-1                                    |
| EF5A        | P63242      | 6  | 6  | 212007.67 | 190028    | 335677    | 185568.67 | 167044.33 | 176618.37 | 197472.5   | 400597    | 214455    | 500572.87   | 0.318120004 | 0.497408611 | 219111.13 | 297332.17 | Up                                                                        | Eukaryotic translation initiation factor 5A-1 O5-Mus-musculus Gm-Ef5a Pe-1 Sv-2                     |
| RP2ZL1      | Q06WY3      | 2  | 2  | 54545.15  | 48192     | 17618     | 57953     | 53730.5   | 50305     | 53631.5    | NA        | 88990.5   | NA          | 0.497388329 | 0.497388329 | 47389.4   | 64609     | Up                                                                        | 40S ribosomal protein S27-like O5-Mus-musculus Gm-Rp2z1 Pe-2 Sv-2                                   |
| SH2         | Q08834      | 1  | 1  | 1211      | 1008      | NA        | 2339      | 1963      | 4087      | 2300       | NA        | 1586      | NA          | 0.318477193 | 0.497371393 | 1880.25   | 2660      | Up                                                                        | SH2 domain-containing adapter protein D O5-Mus-musculus Gm-Sh2 Pe-1 Sv-1                            |
| EP17D9      | P20139      | 20 | 20 | 37179     | 54771.16  | 43205.16  | 87401.16  | 87401.16  | 54801.16  | 54801.16   | 54801.16  | 54801.16  | 54801.16    | 0.318498126 | 0.497371393 | 1880.25   | 2660      | Up                                                                        | Isomorph 1 of Epithelial protein receptor 1 O5-Mus-musculus Gm-Ep17D9 Pe-1 Sv-1                     |
| HEF3A       | P84424      | 17 | 17 | 398563.12 | 177111    | 177045.25 | 345688.12 | 184265.38 | 301268.69 | 114486.69  | 155366.88 | 149472.69 | 104188.08   | 0.318997408 | 0.492221014 | 19034.57  | 124860.8  | Up                                                                        | Histone H3.3 O5-Mus-musculus Gm-H3f3a Pe-1 Sv-2                                                     |
| DAGLA       | Q08WJ1      | 4  | 4  | 7192.5    | 14119     | 7362.5    | 21246.5   | 16618.25  | 25852.25  | 22204.5    | 15131.75  | 13851.5   | 10446.75    | 0.319159488 | 0.495992241 |           |           |                                                                           |                                                                                                     |

|              |          |    |    |           |           |           |           |           |           |           |           |           |             |             |             |             |                  |                                                                        |                                                                                                   |                                                                                                                   |                                                                                     |
|--------------|----------|----|----|-----------|-----------|-----------|-----------|-----------|-----------|-----------|-----------|-----------|-------------|-------------|-------------|-------------|------------------|------------------------------------------------------------------------|---------------------------------------------------------------------------------------------------|-------------------------------------------------------------------------------------------------------------------|-------------------------------------------------------------------------------------|
| DDX42        | QB10A7   | 2  | 2  | 2502      | 8727      | 16535     | 5677      | 26124     | 5         | 43685     | 4171      | NINA      | 2854        | N           | 0.330712424 | 0.480549502 | 2863.4           | 3778.5                                                                 | Up                                                                                                | 0.40008404236034                                                                                                  | ATP-dependent RNA helicase DDX42 OS-Mus musculus GN-Ddx42 PE-1 Sv=3                 |
| CCDC85A      | OSPMR5-3 | 2  | 2  | 16888     | 152305    | 3         | 20993     | 20249     | 21423.5   | 47223     | 21860     | N         | 21860       | N           | 0.33117933  | 0.479396777 | 18278.875        | 20588.67                                                               | Up                                                                                                | 0.145063020825859                                                                                                 | Isomorph 3 of Colicoid-cell domain-containing protein 85A OS-Mus musculus GN-Cdc85a |
| QVRI         | Q4UMV9   | 18 | 18 | 3632.9    | 32328.4   | 32328.4   | 4475.87   | 41231.53  | 42970.87  | 42106.07  | 37254.8   | 40015.22  | 3915.67     | 3           | 0.331123861 | 0.479162361 | 32711.18         | 40511.728                                                              | Up                                                                                                | 0.1035610395064                                                                                                   | Oxidation resistance protein 1 OS-Mus musculus GN-Qvri PE-2 Sv=3                    |
| ADPGAP       | OSVH5    | 4  | 4  | 72147.07  | 59951.07  | 115084.67 | 56127.33  | 66356     | 84222.33  | 160832.33 | 83224.33  | 30568     | 0.33319505  | 0.478925135 | 72913       | 93188.998   | Up               | 0.36495756941898                                                       | Adf-GAP with GTPase, ArpGAP and P21 domain-containing protein OS-Mus musculus GN-Adgap3 PE-1 Sv=1 |                                                                                                                   |                                                                                     |
| PARG         | OB8622   | 1  | 1  | 7402      | 8685      | 10811     | 11180     | 9111      | 10446     | 11277     | 8625      | 11569     | N           | 0.478889885 | 0.9427.8    | 10485.75    | Up               | 0.14391711668525                                                       | Poly(ADP-ribose) glycohydrolase OS-Mus musculus GN-Parg PE-1 Sv=2                                 |                                                                                                                   |                                                                                     |
| PP1R11B      | OB6029   | 17 | 17 | 21341.76  | 22227.06  | 17365.18  | 13398.06  | 23724.76  | 19555.35  | 15615.24  | 15010     | 23725.47  | 5639.41     | 0.332209497 | 0.478587857 | 19611.364   | 19008.29         | Down                                                                   | 0.30319107597713                                                                                  | Protein phosphatase 1 regulatory subunit 18 OS-Mus musculus GN-Ppp1r1b PE-2 Sv=2                                  |                                                                                     |
| HOMER1       | QZ127Y-3 | 5  | 5  | 13        | 34412.75  | 34005.75  | 17725.75  | 26015.75  | 34005.75  | 25595.75  | 23270     | 43768     | 0.479191928 | 0.92046     | 35.25       | 10574       | Down             | 0.8901932602054                                                        | Isomorph 3 of Homer protein homolog 1 OS-Mus musculus GN-Homer1                                   |                                                                                                                   |                                                                                     |
| QVRI         | Q20987   | 1  | 1  | 7136      | 107221    | 94390     | 7813      | 141134    | 98280     | 24239     | 100828    | 27081     | 0.33308209  | 0.47906135  | 92706.2     | 145033.9    | Up               | 0.58662729156137                                                       | Non-degrading enzyme OS-Mus musculus GN-Qvri PE-1 Sv=1                                            |                                                                                                                   |                                                                                     |
| PTN23        | Q6P8A4   | 1  | 1  | 22720     | 29593     | 43586     | 43391     | 36721.31  | 40015.67  | 41788.33  | 35999     | 32459.67  | 48907.67    | 0.333039858 | 0.477503787 | 35202.266   | 40192.268        | Up                                                                     | 0.19124968924856                                                                                  | Tyrosine-protein phosphatase non-receptor type 23 OS-Mus musculus GN-PTn23 PE-1 Sv=2                              |                                                                                     |
| CMC1         | OC8C78   | 1  | 1  | 70460     | 62174     | 13598     | 34817     | 50516     | 41221     | 48571     | 24376     | 73380     | 26472       | 0.33313901  | 0.477307241 | 54021       | 42835.8          | Down                                                                   | 0.33470313819092                                                                                  | COX assembly mitochondrial protein homolog OS-Mus musculus GN-Cmc1 PE-1 Sv=1                                      |                                                                                     |
| PM22         | Q6L171   | 15 | 15 | 53101.8   | 56183.4   | 63471.22  | 65780.87  | 54527.73  | 59545.33  | 53270.8   | 44621.47  | 54247.2   | 45532.47    | 0.333670087 | 0.476468208 | 58959.734   | 54274.814        | Down                                                                   | 0.107567998062076                                                                                 | Proteinase-2 OS-Mus musculus GN-PM22 PE-1 Sv=3                                                                    |                                                                                     |
| SNAP1        | QVH9V4   | 2  | 2  | 41975.1   | 4511      | 31579     | 429       | 4206      | 46685.5   | 57703.5   | 13440.5   | 11075.5   | N           | 0.47933162  | 0.9381.3    | 928.25      | Up               | 0.449213822319362                                                      | Isomorph 4 of Synaptobin OS-Mus musculus GN-Syb1                                                  |                                                                                                                   |                                                                                     |
| PP3PC        | P48455   | 2  | 2  | 43821.5   | 46413     | 79329     | 38704     | 38769.5   | 47157.5   | 52768     | 96210     | 58128     | N           | 0.334712118 | 0.474779464 | 49020.4     | 63607.375        | Up                                                                     | 0.364920465402148                                                                                 | Serine/threonine-protein phosphatase 28 catalytic subunit gamma isoform OS-Mus musculus GN-PP3pc PE-1 Sv=1        |                                                                                     |
| PSMA3        | OT0435   | 3  | 3  | 31763     | 35965.67  | 17840     | 28654.33  | 28315.33  | 35782.67  | 25953.67  | N         | 44554     | N           | 0.33495086  | 0.475018739 | 28490.066   | 35430.113        | Up                                                                     | 0.31455171652704                                                                                  | Proteasome subunit alpha type 3 OS-Mus musculus GN-PSma3 PE-1 Sv=3                                                |                                                                                     |
| PTN22M       | Q67C06   | 3  | 3  | 57555.33  | 62678     | 104243.67 | 39608     | 95352.33  | 62064.33  | 69033     | 123165.67 | 70781.67  | 30562       | 0.334966991 | 0.474999153 | 71887.466   | 142431.33        | Up                                                                     | 0.790261734043205                                                                                 | Membrane-associated glycoprotein/insulin transfer protein OS-Mus musculus GN-PTn22m PE-1 Sv=2                     |                                                                                     |
| UPH2         | Q23448   | 2  | 2  | 56120     | 43232.5   | 109229    | 39890     | 47221.5   | 47272.5   | 45405     | 84995.5   | 95457.5   | 0.335242068 | 0.474654557 | 52788.8     | 76851.4     | Up               | 0.417291566524016                                                      | UDP pyrophase OS-Mus musculus GN-Uph2 PE-1 Sv=1                                                   |                                                                                                                   |                                                                                     |
| KIF21A       | QK09L2-3 | 15 | 15 | 33117.29  | 37265.57  | 30165.36  | 31529.43  | 43228.79  | 45421.36  | 42489.71  | 31963.64  | 43844.5   | 31588.5     | 0.335381794 | 0.474460517 | 35101.28    | 39045.947        | Up                                                                     | 0.15364649036938                                                                                  | Isomorph 3 of kinesin-like protein KIF21A OS-Mus musculus GN-Kif21a                                               |                                                                                     |
| COX6A1       | P43024   | 16 | 16 | 67265.6   | 54328.13  | 79465.2   | 26675.93  | 54978.13  | 45502.53  | 47899.67  | 10796.67  | 4147      | 80990.4     | 0.47440892  | 0.9542.598  | 71875.068   | Up               | 0.34293810214762                                                       | Cytochrome c oxidase subunit 6A1, mitochondrial OS-Mus musculus GN-Cox6a1 PE-1 Sv=2               |                                                                                                                   |                                                                                     |
| NUDFA10      | Q9NLC3   | 17 | 17 | 70682.94  | 70589.82  | 110485.06 | 41148     | 62198.82  | 62082.82  | 63306.47  | 105833.82 | 76269.41  | 158138.73   | 0.335598904 | 0.474779464 | 71056.598   | 93126.446        | Up                                                                     | 0.39021560392414                                                                                  | NADH dehydrogenase (ubiquinone) 1 alpha subcomplex subunit 10, mitochondrial OS-Mus musculus GN-Nudfa10 PE-1 Sv=1 |                                                                                     |
| SNAP1        | QVH9V4   | 10 | 10 | 62261.1   | 76332.7   | 127544.8  | 43667.4   | 63301.8   | 56580.6   | 79197.3   | 136459.4  | 56821.4   | 127270.3    | 0.335695361 | 0.474834598 | 82641.76    | 108552.52        | Up                                                                     | 0.390738080280508                                                                                 | Stronal membrane-associated protein 1 OS-Mus musculus GN-Snap1 PE-1 Sv=1                                          |                                                                                     |
| NPY          | PS7774   | 2  | 2  | 20206.5   | 18574     | 30436.5   | 18150.5   | 20241.5   | 21523     | 30992.5   | 31479.5   | 23156     | 58473.5     | 0.33592107  | 0.473775955 | 21521.8     | 25786.1          | Up                                                                     | 0.364920465402148                                                                                 | Pro-neuropeptide Y OS-Mus musculus GN-Npy PE-1 Sv=2                                                               |                                                                                     |
| TRMT112      | Q9Q0C9   | 3  | 3  | 29328.67  | 28111.67  | 42087.67  | 15319.33  | 26414.33  | 22781.33  | 23994.67  | 48280.67  | 36822     | 43502.67    | 0.336036245 | 0.473613876 | 28252.334   | 35076.668        | Up                                                                     | 0.312141652618605                                                                                 | tRNA methyltransferase 112 homolog OS-Mus musculus GN-Trmt112 PE-2 Sv=1                                           |                                                                                     |
| TMN1L        | QK0126-2 | 2  | 2  | 864       | 4008.5    | 1394.5    | 4314.5    | 7082.5    | 7547      | 6800      | 3215      | 3218      | N           | 0.472545119 | 0.472545119 | 3532.8      | 5395             | Up                                                                     | 0.5563116710007847                                                                                | Isomorph 2 of formin-like protein OS-Mus musculus GN-Fmn1                                                         |                                                                                     |
| NAD          | OS242-3  | 5  | 5  | 54224.4   | 52776.96  | 49362.4   | 62075.4   | 44511.38  | 62141     | 52344.4   | 73517.6   | 49332     | 19785.4     | 0.336196238 | 0.472889898 | 52494.56    | 42423.048        | Down                                                                   | 0.247335793714334                                                                                 | Isomorph 1 of ATP-dependent [5'-NAD(P)+-hydrolytic dehydratase OS-Mus musculus GN-Car1                            |                                                                                     |
| SMCR8        | QJ3UM5   | 1  | 1  | 616       | 777       | N         | 2965      | 661       | 3128      | 1033      | N         | 2283      | N           | 0.336990971 | 0.473744002 | 1254.75     | 2147.6667        | Up                                                                     | 0.775370147940766                                                                                 | Smith-Magenis syndrome chromosomal region candidate gene 8 protein homolog OS-Mus musculus GN-Smcr8 PE-1 Sv=2     |                                                                                     |
| HGGFR3       | Q9IAG7   | 1  | 1  | 24400     | 14115     | 15582     | 6592      | 11015     | 10318     | 12574     | 28627     | 31124     | 0.336990971 | 0.471082149 | 15928.8     | 19587.8     | Up               | 0.312141652618605                                                      | Hepatoma-derived growth factor-related protein 3 OS-Mus musculus GN-HGfrp3 PE-1 Sv=2              |                                                                                                                   |                                                                                     |
| KOR7         | Q5G06A   | 1  | 1  | 4339      | 5694      | 10055     | 5111      | 7862      | 7423      | 8242      | 6340      | 6095      | 36728       | 0.338002778 | 0.473613876 | 16112       | 13085.4          | Up                                                                     | 0.98477780481457                                                                                  | Kc-related protein 7 OS-Mus musculus GN-Kor7 PE-2 Sv=1                                                            |                                                                                     |
| CTF3         | Q71333   | 1  | 1  | 32965     | 39344     | 25278     | 39644     | 37043     | 36893     | 3780      | N         | 40855     | N           | 0.33808466  | 0.468910199 | 37801.661   | 37801.661        | Up                                                                     | 0.11342497275719                                                                                  | CyGAP-like-like family member 6 OS-Mus musculus GN-CTf3 PE-2 Sv=1                                                 |                                                                                     |
| LC18         | OB8077   | 3  | 3  | 3566      | 4796      | 5760      | 8763      | 10767     | 7068      | 7390      | N         | 6055      | N           | 0.33808466  | 0.468910199 | 37801.661   | 37801.661        | Up                                                                     | 0.11342497275719                                                                                  | CyGAP-like-like family member 6 OS-Mus musculus GN-CTf3 PE-2 Sv=1                                                 |                                                                                     |
| SKR3         | Q6P656   | 3  | 3  | 14090.67  | 21069.33  | 11339.67  | 15513.33  | 18518.33  | 21038.67  | 19560.67  | 25561.67  | 34404     | 0.468006716 | 0.9426.584  | 28314.66    | Up          | 0.29362267260517 | Serine/threonine-protein kinase SKR3 OS-Mus musculus GN-Skr3 PE-1 Sv=3 |                                                                                                   |                                                                                                                   |                                                                                     |
| SNF33        | Q91W61   | 7  | 7  | 40301.57  | 75123.43  | 47512     | 104273    | 71092.43  | 93495.47  | 99572.29  | 94598.86  | 58718.43  | 65185.43    | 0.340040367 | 0.467881334 | 16905.438   | 28316.116        | Up                                                                     | 0.21231395157877                                                                                  | Sideroflexin-3 OS-Mus musculus GN-Snf33 PE-1 Sv=1                                                                 |                                                                                     |
| PCDH2        | Q9N031-3 | 1  | 1  | 43376     | 10806     | 333       | 23996     | 333       | 23996     | 333       | 23996     | 333       | 23996       | 0.468006716 | 0.9426.584  | 28314.66    | Up               | 0.29362267260517                                                       | Serine/threonine-protein kinase SKR3 OS-Mus musculus GN-Skr3 PE-1 Sv=3                            |                                                                                                                   |                                                                                     |
| GLYS468MBORR | Q9B04A   | 8  | 8  | 45345.45  | 44704.38  | 57890.12  | 5280      | 50890     | 50871.75  | 61592.25  | 55558.36  | 53809.88  | 103724.5    | 0.340107538 | 0.467140654 | 53506.2     | 65313.552        | Up                                                                     | 0.27230729118532                                                                                  | Isomorph 2 of proteinase-2 OS-Mus musculus GN-Gly468mborr PE-2 Sv=1                                               |                                                                                     |
| KALRN        | AC2649-7 | 1  | 1  | 1137      | 3635      | 2123      | 3564      | 3700      | 4085      | 3943      | 4977      | 1816      | N           | 0.341153546 | 0.467050111 | 2831.8      | 3705.25          | Up                                                                     | 0.387851510510334                                                                                 | Isomorph 2 of Kallirin OS-Mus musculus GN-Kalrn                                                                   |                                                                                     |
| CAR4         | Q64444   | 1  | 1  | 8547      | 14505     | 23967     | 6783      | 12086     | 8483      | 15805     | 37432     | 17339     | 13980       | 0.341007399 | 0.466472722 | 13353.6     | 15929.8          | Up                                                                     | 0.53335716638162                                                                                  | Carbonic anhydrase 4 OS-Mus musculus GN-Car4 PE-1 Sv=1                                                            |                                                                                     |
| PAF26        | Q74962   | 7  | 7  | 87296.71  | 12389.86  | 12005.74  | 90747.34  | 92744.71  | 91433.57  | 121246.33 | 113898.29 | 116874.33 | 100831      | 0.341729997 | 0.466481804 | 101246.8    | 109572.14        | Up                                                                     | 0.115228704048447                                                                                 | Isomorph 2 of formin-like protein OS-Mus musculus GN-Paf26                                                        |                                                                                     |
| NPW5         | Q91W61   | 3  | 3  | 3331.5    | 6015.5    | 9356      | 3061.5    | 3061.5    | 3061.5    | 3061.5    | 4251.5    | 4251.5    | N           | 0.465103918 | 0.465103918 | 4251.5      | 4251.5           | Up                                                                     | 0.428620019100191                                                                                 | Isomorph 2 of formin-like protein OS-Mus musculus GN-Npw5                                                         |                                                                                     |
| CP1LC        | OB8055   | 1  | 1  | 509       | 5613      | 1407      | 7634      | 4321      | 5449      | 6139      | N         | 4512      | N           | 0.342582912 | 0.465234304 | 3896.8      | 5366.667         | Up                                                                     | 0.461736394215                                                                                    | Carnitine O-palmitoyltransferase 1, brain isoform OS-Mus musculus GN-Cp1lc PE-1 Sv=1                              |                                                                                     |
| TCERG1       | OB8077-3 | 1  | 1  | 55153     | 52898     | N         | 34754     | 46848     | 57513     | 44370     | 44370     | 63816     | N           | 0.343136227 | 0.464533428 | 47411.25    | 55231            | Up                                                                     | 0.22024020256493                                                                                  | Isomorph 3 of Transcription elongation factor 1 OS-Mus musculus GN-Tcerg1                                         |                                                                                     |
| PHF24        | Q80174   | 18 | 18 | 20291.65  | 22335.06  | 23463.53  | 23950.18  | 23351.65  | 25001.18  | 23093.35  | 19635.18  | 24736.47  | 42529.82    | 0.343474978 | 0.464099576 | 22678.814   | 26999.6          | Up                                                                     | 0.251592838088847                                                                                 | Protein KIAA1045 OS-Mus musculus GN-Phf24 PE-2 Sv=2                                                               |                                                                                     |
| PHF24        | Q80174   | 18 | 18 | 20291.65  | 22335.06  | 23463.53  | 23950.18  | 23351.65  | 25001.18  | 23093.35  | 19635.18  | 24736.47  | 42529.82    | 0.343474978 | 0.464099576 | 22678.814   | 26999.6          | Up                                                                     | 0.251592838088847                                                                                 | Protein KIAA1045 OS-Mus musculus GN-Phf24 PE-2 Sv=2                                                               |                                                                                     |
| ZF598B       | OB8076-2 | 2  | 2  | 511.5     | 7215.5    | N         | 2228      | 558       | 1872      | 2228      | 558       | 1872      | 2228        | 0.343811894 | 0.464099576 | 22678.814   | 26999.6          | Up                                                                     | 0.251592838088847                                                                                 | Protein KIAA1045 OS-Mus musculus GN-Phf24 PE-2 Sv=2                                                               |                                                                                     |
| DNAL1        | Q05462   | 1  | 1  | 52470     | 45939     | 59393     | 31164     | 41586     | 46093     | 35065     | 21609     | 80710     | 129938      | 0.343949499 | 0.463511001 | 14104       | 66281            | Up                                                                     | 0.523546270156464                                                                                 | Isomorph 3 of Dyx19c1 light chain 1, axonemal OS-Mus musculus GN-Dnal1                                            |                                                                                     |
| SNR3         | Q70492   | 15 | 15 | 118997.07 | 110377.29 | 149158.57 | 60961.79  | 105778.79 | 88464.57  | 112709.64 | 140778.79 | 164795    | 164795      | 0.344000387 | 0.463511001 | 14104       | 66281            | Up                                                                     | 0.523546270156464                                                                                 | Isomorph 3 of Dyx19c1 light chain 1, axonemal OS-Mus musculus GN-Dnal1                                            |                                                                                     |
| TCUB48       | Q04029   | 40 | 40 | 28478.79  | 34062.36  | 402476.36 | 402476.36 | 402476.36 | 402476.36 | 402476.36 | 402476.36 | 402476.36 | 402476.36   | 0.344000387 | 0.463511001 | 14104       | 66281            | Up                                                                     | 0.523546270156464                                                                                 | Isomorph 3 of Dyx19c1 light chain 1, axonemal OS-Mus musculus GN-Dnal1                                            |                                                                                     |
| MT14         | Q92941   | 1  | 1  | 9783      | 12750     | N         | 10364     | 14391     | 11472     | 13831     | N         | 23223     | N           | 0.344758094 | 0.462485538 | 11772       | 16175.331        | Up                                                                     | 0.45843995484758                                                                                  | Myosin light chain 4 OS-Mus musculus GN-Mt14 PE-2 Sv=3                                                            |                                                                                     |
| CFI2         | P45591   | 15 | 15 | 88123.67  | 83855.93  | 108680.27 | 99870.33  | 73614.13  | 79924.93  | 92707.07  | 79539.8   | 92078.13  | 71166.67    | 0.344782488 | 0.462341455 | 90828.746   | 82827.32         | Down                                                                   | 0.125052091591717                                                                                 | Cofilin-2 OS-Mus musculus GN-Cfi2 PE-1 Sv=1                                                                       |                                                                                     |
| MAP2K1       | P31938   | 4  | 4  | 13579.5   | 17885     | 15245.25  | 37449     | 12622     | 27699     | 15377.5   | 8003.25   | 14526.25  | 9188.5      | 0.345189882 | 0.461930494 | 19314.25</  |                  |                                                                        |                                                                                                   |                                                                                                                   |                                                                                     |

|          |           |    |    |           |           |           |           |           |           |           |           |           |             |              |            |           |           |                                                                                                   |                                                                                                           |
|----------|-----------|----|----|-----------|-----------|-----------|-----------|-----------|-----------|-----------|-----------|-----------|-------------|--------------|------------|-----------|-----------|---------------------------------------------------------------------------------------------------|-----------------------------------------------------------------------------------------------------------|
| LOCRC1   | QCRC13    | 43 | 43 | 40483.24  | 36212.74  | 59349.07  | 44014.31  | 51549.62  | 47968.08  | 32999.02  | 37655.74  | 27798.9   | 0.3601995   | 0.44238238   | 45223.946  | 39500.032 | Down      | Cytochrome b-c1 complex subunit 1, mitochondrial OS-Musculus GN-Ugcrc1 Pe-1 Sv-2                  |                                                                                                           |
| PHF24    | OBFL4-2   | 13 | 13 | 24135     | 25999.23  | 30099.38  | 25949.69  | 27858.92  | 28105.15  | 24566.88  | 24580.77  | 24657.46  | 55615.92    | 0.44239178   | 26627.644  | 33689.276 | Up        | Isocytome b-2 protein KAA1045 OS-Musculus GN-Kaa1045                                              |                                                                                                           |
| ADPN     | OBDF3     | 4  | 4  | 12202     | 15216     | 12209     | 15735.33  | 16150     | 2017.33   | 13028     | 2870      | 11461     | 9384.33     | 0.36134829   | 14988.468  | 12366.132 | Down      | Apelin OS-Musculus GN-Adpfn Pe-1 Sv-2                                                             |                                                                                                           |
| MAPRE3   | OBDF3     | 6  | 6  | 94717.83  | 94833.1   | 12433.1   | 16889     | 90882.1   | 80655.1   | 90653.1   | 96833.1   | 96833.1   | 94361.80    | 0.44205897   | 94361.80   | 111795.9  | Up        | Microtubule-associated protein RP/E family member 3 OS-Musculus GN-Mapre3 Pe-1 Sv-1               |                                                                                                           |
| ELC4     | OBDR5     | 2  | 2  | 102198    | 109464    | 102707    | 140131    | 125220.1  | 120651    | 137030    | 92912.5   | 116137    | 75314       | 0.36136708   | 116144.1   | 104943.1  | Down      | Innermost light chain 4 OS-Musculus GN-Elc4 Pe-1 Sv-1                                             |                                                                                                           |
| ARHGAP39 | P59281    | 6  | 6  | 23435     | 27423.5   | 29288.5   | 25480.5   | 35641.5   | 35385     | 48534.67  | 31147.5   | 43080.17  | 14379       | 0.36140042   | 40420.1333 | 28255.6   | 34505.268 | Up                                                                                                | Rho GTPase-activating protein 39 OS-Musculus GN-Arhgap39 Pe-1 Sv-2                                        |
| ADP2     | OBK35     | 4  | 4  | 19477.25  | 25849.75  | 40952     | 88653     | 29995.25  | 49305     | 14330.75  | 23701.25  | 24775     | 41301.75    | 0.36140042   | 44545.15   | 3138      | Down      | Amyloid-like protein 2 OS-Musculus GN-Adp2 Pe-1 Sv-4                                              |                                                                                                           |
| SEPRN1   | OBK44     | 1  | 1  | NA          | 0.36131045   | 1690.6667  | 2721      | Up        | Neurexin OS-Musculus GN-Seprn1 Pe-1 Sv-1                                                          |                                                                                                           |
| SPIG     | OBK47     | 6  | 6  | 11631     | 12796     | 873.5     | 18677.17  | 17795.33  | 21587.67  | 21440.33  | 9713.83   | 17812.17  | 10981.33    | 0.3613506015 | 439373981  | 12378.6   | 16307.064 | Up                                                                                                | Striated muscle-specific serine/threonine-protein kinase OS-Musculus GN-Spig Pe-1 Sv-2                    |
| MEI1     | OBK47     | 1  | 1  | 14807     | 12780     | 9982      | 12664     | 18004     | 13602     | 12585     | NA        | 10647     | NA          | 0.3613743065 | 439204203  | 13603.4   | 15278     | Up                                                                                                | Male-enhanced antigen 1 OS-Musculus GN-Mei1 Pe-2 Sv-1                                                     |
| PKCII    | OBK47     | 1  | 1  | 5162      | 3578      | 2815      | 3179      | 4187      | 4092      | 4698      | NA        | 7000      | NA          | 0.361458945  | 438118495  | 4582      | 31363.1   | Up                                                                                                | cAMP-dependent protein kinase inhibitor gamma OS-Musculus GN-PkcII Pe-1 Sv-1                              |
| EFHD2    | OBK50     | 14 | 14 | 35415.46  | 23861     | 35978.15  | 23114.77  | 27764     | 29779.77  | 26748.13  | 11556.62  | 34838.69  | 39370.78    | 0.361478812  | 437959313  | 29226.676 | 24448.754 | Down                                                                                              | EF-hand domain-containing protein OS-Musculus GN-Efhd2 Pe-1 Sv-2                                          |
| CALU     | OBK587    | 5  | 5  | 32048.4   | 33310.6   | 52533.6   | 27073.6   | 21947.8   | 33920.2   | 26457.6   | 39391.6   | 41302.6   | 0.364939972 | 437714522    | 34211.56   | 41537.88  | Up        | Calumenin OS-Musculus GN-Calu Pe-1 Sv-1                                                           |                                                                                                           |
| SLC23    | P23017    | 1  | 1  | 25754     | 42285     | 42927     | 60836     | 45070     | 54417     | 52937     | 84887     | 35068     | 40073       | 0.361516826  | 437050542  | 43476.4   | 53468.6   | Up                                                                                                | Solute carrier family 2, facilitated glucose transporter member 3 OS-Musculus GN-Slc23 Pe-1 Sv-1          |
| EFNB1    | OBK612-2  | 1  | 1  | 45277     | 42428     | 68275     | 12349     | 38723     | 27198     | 65895     | 49812     | 61589     | 87720       | 0.364854987  | 437216374  | 43523.4   | 54842.4   | Up                                                                                                | Isocytome 2 of Protein LAR2 OS-Musculus GN-Efnb1                                                          |
| BIN1     | OBK639    | 39 | 39 | 97369.95  | 107203.4  | 81022.69  | 135243.54 | 115666.23 | 112369.08 | 107267.18 | 80959.77  | 112322.56 | 52189.41    | 0.365048405  | 436751022  | 107279.57 | 93003.6   | Down                                                                                              | Myo box-dependent-interacting protein 1 OS-Musculus GN-Bin1 Pe-1 Sv-1                                     |
| BAIAP2   | OBK639-X  | 40 | 40 | 85761.95  | 81317.7   | 121476.12 | 40945.45  | 78262.4   | 56626.6   | 75165.02  | 128734.45 | 93476.6   | 193253.38   | 0.365856699  | 436688898  | 81474.284 | 108421.41 | Up                                                                                                | Isocytome 4 of Brain-specific angiogenesis inhibitor 1-associated protein 2 OS-Musculus GN-Baiap2         |
| NMT2     | OBK639    | 1  | 1  | 19666     | 17740     | 30515     | 9012      | 18104     | 21180     | 8945      | NA        | 40874     | NA          | 0.366227504  | 436248298  | 15007.4   | 27156.333 | Up                                                                                                | Cyclopentide N-tetra-decanoyltransferase 2 OS-Musculus GN-Nmt2 Pe-2 Sv-1                                  |
| ARSGA2   | OBK639    | 6  | 6  | 28478.83  | 28559     | 21429.67  | 33048.67  | 25737.67  | 34651.67  | 42300.33  | 12905     | 46457.17  | NA          | 0.366302733  | 436315866  | 29777.98  | 35756.040 | Up                                                                                                | ADP-ribosylation factor GTPase-activating protein 2 OS-Musculus GN-Arsga2 Pe-1 Sv-1                       |
| SHAP2    | OBK639    | 14 | 14 | 73304     | 74960.21  | 75678.07  | 55896.57  | 75824.79  | 73139.86  | 59395     | 68371.14  | 103897.5  | 66216.29    | 0.364854919  | 435848519  | 71132.72  | 78924.258 | Up                                                                                                | Protein shisa-1 OS-Musculus GN-Shia7 Pe-1 Sv-3                                                            |
| COBPS1   | P56391    | 37 | 37 | 436232.69 | 374883    | 801486.03 | 135271.06 | 368048.47 | 248739.36 | 301241.69 | 883565.69 | 512395.19 | 1173059.7   | 0.366593927  | 435843842  | 42914.25  | 62390.362 | Up                                                                                                | Cytochrome c oxidase subunit 6B1 OS-Musculus GN-Cobps1 Pe-1 Sv-2                                          |
| COBPS2   | OBK639    | 1  | 1  | 52781     | 49624     | 72002     | 28164     | 42655     | 34222     | 11851     | 114314    | 36747     | 121976      | 0.366599927  | 435807744  | 48955.6   | 69892     | Up                                                                                                | COPII signalosome complex subunit 8 OS-Musculus GN-Cobps2 Pe-1 Sv-2                                       |
| NUFIP6   | OBK639    | 4  | 4  | 11138.5   | 18971     | 5921      | 17917     | 17931     | 7117.75   | 18800.75  | NA        | 13794.75  | NA          | 0.366723783  | 435466095  | 14377.5   | 17754.417 | Up                                                                                                | NADH dehydrogenase [ubiquinone] 1 beta subcomplex subunit 6 OS-Musculus GN-Nufip6 Pe-1 Sv-3               |
| MAPRE2   | OBK639    | 11 | 11 | 86123.33  | 88090.89  | 183339.78 | 90338.44  | 85919.56  | 99325.89  | 95623.11  | 108732    | 97206     | 180414.33   | 0.367097898  | 435122353  | 97762.4   | 116260.27 | Up                                                                                                | Microtubule-associated protein RP/E family member 2 OS-Musculus GN-Mapre2 Pe-1 Sv-1                       |
| PSD1     | OBK639    | 4  | 4  | 142849.5  | 89163.25  | 75103.5   | 44627.75  | 92195.75  | 67283.5   | 96259.5   | 11521     | 92811.25  | 37787       | 0.367441116  | 434812249  | 61817.95  | 69054.65  | Down                                                                                              | PC4 and SF851-interacting protein OS-Musculus GN-Psd1 Pe-1 Sv-1                                           |
| LIPP     | OBK639    | 3  | 3  | 11167     | 12115.33  | 13787.67  | 13410     | 10559.67  | 12378.67  | 12804     | 20099.33  | 11881.67  | 10509.67    | 0.368131474  | 4331780015 | 12029.934 | 1394.668  | Up                                                                                                | Phosphatidylinositol phosphatidyle inorganic pyrophosphatase OS-Musculus GN-Lipp Pe-2 Sv-2                |
| MTA1     | OBK639    | 1  | 1  | 7524      | 5118      | 7792      | 10960     | 8474      | 71116     | 78784     | NA        | 8556      | NA          | 0.36848952   | 433188842  | 8413.6    | 9483.333  | Up                                                                                                | Metastasis-associated protein MTA1 OS-Musculus GN-Mta1 Pe-1 Sv-1                                          |
| ZKSCAN2  | OBK639-2  | 1  | 1  | 7389      | 1088      | 5000      | 6000      | 7000      | 9000      | 6036      | 9636      | 15489     | 1218        | 0.36848952   | 433188842  | 73251.984 | 7710      | Down                                                                                              | RNA-binding domain-containing protein OS-Musculus GN-Zkscan2                                              |
| EFENAF1  | OBK639    | 1  | 1  | 3398      | 4344      | 5168      | 10408     | 5785      | 10343     | 6536      | 8323      | 4790      | NA          | 0.369292234  | 432628955  | 5833      | 7448      | Up                                                                                                | Eukaryotic translation initiation factor 4E transporter OS-Musculus GN-Efenaf1 Pe-1 Sv-2                  |
| ASAP2    | OBK639    | 1  | 1  | NA          | 0.369327259  | 432353724  | 2310      | 16183     | Down                                                                                              | Arg-GAP with SH3 domain, Arkin repeat and PI domain-containing protein 2 OS-Musculus GN-Asap2 Pe-1 Sv-3   |
| PRPF6    | OBK639    | 1  | 1  | 939       | NA        | NA        | 1933      | 2116      | 16994     | NA        | NA        | 2241      | NA          | 0.369280818  | 432666667  | 1662.6667 | 2086      | Up                                                                                                | Pre-mRNA-splicing factor 6 OS-Musculus GN-Prpf6 Pe-2 Sv-1                                                 |
| VASH1    | OBK639    | 1  | 1  | NA        | NA        | NA        | 5972      | 4516      | 7772      | 6174      | NA        | NA        | NA          | 0.369692013  | 433196013  | 5694      | 6973      | Up                                                                                                | Yeshoshin-1 OS-Musculus GN-Vash1 Pe-2 Sv-1                                                                |
| NAIP1    | P28656    | 16 | 16 | 44958.62  | 46615.62  | 39141.56  | 45719     | 42024     | 46189.19  | 48887     | 47728.81  | 60645.69  | 43899.873   | 0.361983675  | 45223.91   | 48994.938 | Up        | Nucleosome assembly protein 1-like 1 OS-Musculus GN-Naip1 Pe-1 Sv-2                               |                                                                                                           |
| CMC20    | P67871    | 6  | 6  | 30310.67  | 28223     | 34936.17  | 19915.67  | 30799.83  | 25874.5   | 26215.33  | 34861.67  | 38272.17  | 35986.67    | 0.370030997  | 43411446   | 28337.088 | 32242.068 | Up                                                                                                | Casem kinase I subunit beta OS-Musculus GN-Cmc20 Pe-1 Sv-2                                                |
| HCS1     | P49710    | 1  | 1  | 54872     | 47640     | 98798     | 25239     | 40445     | 48005     | 48043     | 33998     | 88345     | 120993      | 0.370566153  | 451380863  | 53584     | 69971.6   | Up                                                                                                | Hemoglobin I subunit beta OS-Musculus GN-Hcs1 Pe-1 Sv-1                                                   |
| SLC20A2  | P49710    | 82 | 82 | 55431.98  | 87796.38  | 87963.38  | 87567.38  | 78459.38  | 84359.38  | 78459.38  | 78459.38  | 71079.01  | 124894.61   | 0.370566153  | 451380863  | 73251.984 | 7710      | Down                                                                                              | Hemoglobin I subunit beta OS-Musculus GN-Hcs1 Pe-1 Sv-1                                                   |
| ETL4     | A2A2205-2 | 13 | 13 | 44222.08  | 44822.08  | 44536.23  | 39135.46  | 50310.23  | 4917.15   | 50270.46  | 46951     | 63899.31  | 36086.77    | 0.371356291  | 4340209214 | 44606.016 | 49276.938 | Up                                                                                                | Isocytome 6 of Sickle tail protein OS-Musculus GN-Etl4                                                    |
| TNR      | OBK639-2  | 20 | 20 | 15633.47  | 17711.07  | 18583.33  | 25891.07  | 18765     | 20575.33  | 20790.89  | 14578.07  | 26269.93  | 45138.47    | 0.371376938  | 434015069  | 19136.788 | 2477.16   | Up                                                                                                | Isocytome 2 of Tescin-9 OS-Musculus GN-Tnr                                                                |
| ATP5E    | P56391    | 9  | 9  | 123129.56 | 110927.62 | 121319    | 90140.22  | 109737.22 | 80318.62  | 94240.84  | 84955     | 137711.11 | 102942.22   | 0.371659573  | 4329812263 | 111370.73 | 101809.69 | Down                                                                                              | ATP synthase subunit epsilon, mitochondrial OS-Musculus GN-Atp5e Pe-1 Sv-2                                |
| SLC20A2  | P49710    | 82 | 82 | 55431.98  | 87796.38  | 87963.38  | 87567.38  | 78459.38  | 84359.38  | 78459.38  | 78459.38  | 71079.01  | 124894.61   | 0.371659573  | 4329812263 | 73251.984 | 7710      | Down                                                                                              | Hemoglobin I subunit beta OS-Musculus GN-Hcs1 Pe-1 Sv-1                                                   |
| BAIAP2   | OBK639-X  | 40 | 40 | 78610.62  | 74902.38  | 111859.87 | 73271.27  | 52777.24  | 65059.83  | 116002.53 | 86094.87  | 127499.18 | 137240.68   | 0.429084987  | 475243.428 | 89024.67  | Up        | Isocytome 3 of Brain-specific angiogenesis inhibitor 1-associated protein 2 OS-Musculus GN-Baiap2 |                                                                                                           |
| PDP1     | Q3U70     | 2  | 2  | 27575.5   | 53084.5   | 53084.5   | 53686.5   | 40312.5   | 57514.5   | 52517     | NA        | 37114.5   | NA          | 0.372572306  | 432849943  | 40984.9   | 49067.333 | Up                                                                                                | [Pyruvate dehydrogenase [acetyl-transferring]] phosphatase 1, mitochondrial OS-Musculus GN-Pdp1 Pe-2 Sv-1 |
| PI1893-2 | P56391    | 2  | 2  | 27575.5   | 20025.33  | 21980.5   | 25917.7   | 23414.83  | 25210     | 25314     | 30109.67  | 2219      | NA          | 0.428499483  | 432426.758 | 2567      | 2570.25   | Down                                                                                              | Isocytome 2 of c-complex protein 1 subunit alpha OS-Musculus GN-Top1                                      |
| CA125B   | P56391    | 5  | 5  | 23674.74  | 23674.74  | 16485.8   | 3271.2    | 2198      | 2198      | 2198      | 19329     | 19329     | 19329       | 0.428499483  | 432426.758 | 23674.74  | 2567      | Down                                                                                              | Isocytome 2 of c-complex protein 1 subunit alpha OS-Musculus GN-Top1                                      |
| MRP28    | OBK639    | 4  | 4  | 35084     | 33316.33  | 38745     | 24414.33  | 29545.67  | 28634.33  | 12308     | 40291.33  | 39323     | 37768       | 0.374521888  | 426754777  | 3221.466  | 35410.932 | Up                                                                                                | 3P5 ribosomal protein L28, mitochondrial OS-Musculus GN-Mrp28 Pe-2 Sv-1                                   |
| CACNG8   | QBWVW     | 5  | 5  | 30587.6   | 55905.4   | 99733.4   | 82748     | 55014.2   | 84562.4   | 317869    | 93946.6   | 101663    | 20876.2     | 0.37555574   | 425325574  | 6525.72   | 85843.72  | Up                                                                                                | Voltage-dependent calcium channel gamma-8 subunit OS-Musculus GN-Cacng8 Pe-1 Sv-1                         |
| SHRPA    | P97797    | 6  | 6  | 7697.67   | 10045     | 12871.33  | 35438.67  | 12296.83  | 29848.67  | 25695.33  | 18993.67  | 16693.33  | 14643.17    | 0.378543932  | 4245890432 | 15027.6   | 21472.034 | Up                                                                                                | Tyrosine-protein phosphatase non-receptor type substrate 1 OS-Musculus GN-Shrpa Pe-1 Sv-1                 |
| ATM7A4   | OBK639    | 4  | 4  | 29219     | 36992.75  | 59172.75  | 31267     | 28440.75  | 28405.5   | 45440     | 100236    | 40028     | 46855       | 0.378543932  | 4245890432 | 37093.95  | 51912.1   | Up                                                                                                | Complement C3a/tumor necrosis factor-related protein 4 OS-Musculus GN-Atm7a4 Pe-1 Sv-1                    |
| HOMEK1   | OBK639-2  | 2  | 2  | 48924.5   | 54117     | 37388.5   | 340310.5  | 31483     | 69328     | 32128     | NA        | 23950     | NA          | 0.378543932  | 4245890432 | 105870.57 | 41533.333 | Down                                                                                              | Isocytome 5 of Homer protein homolog 1 OS-Musculus GN-Homek1                                              |
| HMGBS3   | OBK639    | 1  | 1  | 7054      | 5694      | 1220      | 9131      | 5546      | 4013      | 3869      | NA        | 6365      | 12336       | 0.378543932  | 4245890432 | 4483.4    | 68970.75  | Up                                                                                                | High molecular weight protein 83 OS-Musculus GN-Hmgbs3 Pe-2 Sv-3                                          |
| PROX1    | P35700    | 11 | 11 | 76526.91  | 83558.91  | 92859     | 67339.91  | 76688.36  | 74116.64  | 85344.55  | 111751.45 | 80956.91  | 0.378636698 | 422121531    | 79349.418  | 86677.67  | Up        | Peroxiredoxin 1 OS-Musculus GN-Prox1 Pe-1 Sv-1                                                    |                                                                                                           |
| MDX1     | P35700    | 3  | 3  | 94580.33  | 95911.33  | 100184.33 | 20571.33  | 44072.67  | 39960.33  | 42097     | 150679.33 | 69007     | 175803.67   | 0.423827374  | 423827374  | 64886.798 | 86253.333 | Up                                                                                                | Metastasis-associated protein 2 OS-Musculus GN-Mdx1 Pe-1 Sv-1                                             |
| CCOMMD1  | OBK639    | 4  | 4  | 48456.25  | 46918     | 29553     | 45398.25  | 50476.25  | 54004.25  | 48443.25  | 53642.25  | 28980.25  |             |              |            |           |           |                                                                                                   |                                                                                                           |



|          |          |    |    |           |           |           |           |           |           |           |           |           |             |             |             |           |           |                   |                                                                               |                                                                                                    |
|----------|----------|----|----|-----------|-----------|-----------|-----------|-----------|-----------|-----------|-----------|-----------|-------------|-------------|-------------|-----------|-----------|-------------------|-------------------------------------------------------------------------------|----------------------------------------------------------------------------------------------------|
| MAPP     | Q31780   | 3  | 3  | 29260.5   | 26509     | 21469     | 13574     | 20998     | 12722.5   | 27020.5   | NA        | 42827.5   | 22458       | 0.41970017  | 0.377060909 | 22946.1   | 28532.375 | Up                | 0.3143508714605                                                               | Microtubule-associated protein 9 O5s-Mus musculus GN-Map9 Pe-2 Sv-2                                |
| MR10A    | P53036   | 20 | 9  | 53052.67  | 84106.44  | 76862.11  | 118320.22 | 80998.22  | 100251    | 122799.44 | 86620.67  | 93832.56  | 76260.44    | 0.41972606  | 0.37703319  | 84666.132 | 59992.82  | Up                | 0.18141549717822                                                              | 60S ribosomal protein L10a O5s-Mus musculus GN-Rpl10a Pe-1 Sv-3                                    |
| PRKCG    | P63818   | 20 | 20 | 86964.2   | 52511.1   | 41322     | 70036.16  | 45558.85  | 62475.5   | 66832.56  | 47275.45  | 51136.45  | 48509.15    | 0.41976493  | 0.37699437  | 48524.55  | 55542.47  | Up                | 0.16299772360523                                                              | Protein kinase C gamma type O5s-Mus musculus GN-PK-C Pe-1 Sv-3                                     |
| PHF1     | P77447   | 6  | 6  | 44685.8   | 42720     | 45365.83  | 50593.33  | 48003     | 47218.33  | 53191.67  | 10248.17  | 63945     | 6310.33     | 0.42012801  | 0.376752537 | 46195.932 | 35742.8   | Down              | 0.37011151074742                                                              | Case and a half UIM domain protein 1 O5s-Mus musculus GN-PH1 Pe-1 Sv-3                             |
| DCN2     | Q09808   | 6  | 6  | 55639.41  | 63893.31  | 46513.04  | 69887.1   | 52754.76  | 61670.07  | 60699.63  | 61833.5   | 59523.79  | 30672.86    | 0.42019951  | 0.37641046  | 56772.66  | 51195.448 | Down              | 0.17349799862397                                                              | Dynactin subunit 2 O5s-Mus musculus GN-Dctn2 Pe-1 Sv-3                                             |
| ATP12B   | P14231   | 6  | 6  | 9119.33   | 13077     | 8591.17   | 21831     | 11196     | 18296.83  | 16280.5   | 11668.17  | 14058.67  | NA          | 0.420701952 | 0.376025473 | 12762.9   | 15163.541 | Up                | 0.24850557568198                                                              | Sodium/potassium-translocating ATPase subunit beta 2 O5s-Mus musculus GN-ATP12b Pe-1 Sv-2          |
| PTPRD    | P27022   | 2  | 2  | 12301     | 17786     | 14407     | 20796     | 18675.5   | 20796     | 18675.5   | 20796     | 18675.5   | 20796       | 0.420701952 | 0.376025473 | 12762.9   | 15163.541 | Up                | 0.2477234345121                                                               | Prostaglandin synthase 2 O5s-Mus musculus GN-PTPRD Pe-1 Sv-2                                       |
| CDJ1A3   | Q10143   | 9  | 9  | 490228.95 | 612531.1  | 664621.89 | 56370.17  | 493218.78 | 533588.22 | 642068.08 | 65217.41  | 50497.78  | 719768.78   | 0.421234919 | 0.375466356 | 56310.67  | 10305.01  | Up                | 0.115515552023446                                                             | Thymidine alpha chitinase 1 O5s-Mus musculus GN-Thf1a3 Pe-2 Sv-2                                   |
| UQCRC    | Q05855   | 27 | 27 | 284055.85 | 243439.22 | 201593    | 236280.19 | 270187.04 | 264562.11 | 233555.81 | 167574.67 | 199271.41 | 106612.31   | 0.421260548 | 0.375454921 | 247114.92 | 214455.67 | Down              | 0.20449730748971                                                              | Cytochrome b-c1 complex subunit 1 O5s-Mus musculus GN-Uqcrcb Pe-1 Sv-3                             |
| ME1AP1   | Q88848   | 5  | 5  | 9140.25   | 9760.5    | 13718     | 19956     | 15822.75  | 16430.5   | 21370.75  | NA        | 2190.25   | NA          | 0.421266669 | 0.375442901 | 13679.5   | 17108.167 | Up                | 0.32266667860014                                                              | Methionine aminopeptidase 1 O5s-Mus musculus GN-Metap1 Pe-2 Sv-1                                   |
| HTD1A    | Q85287   | 6  | 6  | 39779.67  | 39590.5   | 30874.62  | 49317     | 38921     | 47659.33  | 38174.39  | 31285.87  | 58472.17  | 14875.67    | 0.421400902 | 0.375296173 | 39480.968 | 48092.014 | Up                | 0.28446582828203                                                              | Transcription factor BTF3 homolog 1 O5s-Mus musculus GN-HTF1a Pe-2 Sv-1                            |
| STX2     | Q00362   | 1  | 1  | 12732     | 34322     | 4592      | 82939     | 39535     | 70618     | 3689      | 3232      | 46517     | NA          | 0.421400902 | 0.375296173 | 39480.968 | 48092.014 | Up                | 0.44891184491344                                                              | Translocase O5s-Mus musculus GN-Stx2 Pe-1 Sv-2                                                     |
| NCKAP1   | P28660   | 4  | 4  | 55944.25  | 69744     | 45210.75  | 60551.25  | 80983.25  | 61830.5   | 93112.25  | 43581.75  | 101262    | 48289.25    | 0.42140083  | 0.37510083  | 62492.7   | 73775.15  | Up                | 0.23944725805737                                                              | Nck-associated protein 1 O5s-Mus musculus GN-Nckap1 Pe-1 Sv-2                                      |
| RANBP9   | P69566   | 2  | 1  | 9503      | 29918     | 23401     | 13493     | 15607     | 14092     | 28872     | 13141     | 82864     | 0.422709728 | 0.373957758 | 18811       | 30915.1   | Up        | 0.716737973746019 | isoform 2 of Ran-binding protein 9 O5s-Mus musculus GN-Ranbp9                 |                                                                                                    |
| MIR37L   | Q02157   | 1  | 1  | 31835     | 51619     | 23464     | 34834     | 24402     | 44610     | 41552     | 24530     | 48286     | NA          | 0.422709847 | 0.37381642  | 33202     | 33994.5   | Up                | 0.2454924892485                                                               | 39S ribosomal protein L37, mitochondrial O5s-Mus musculus GN-Mir37L Pe-2 Sv-1                      |
| MRP8     | P71324-3 | 2  | 2  | 3454      | 4365.5    | NA        | 12548     | 8066      | 10765.5   | 10204     | NA        | 8340.5    | NA          | 0.422709847 | 0.37381642  | 33202     | 33994.5   | Up                | 0.36491209945659                                                              | isoform 3 of Myosin phosphatase Rho-interacting protein O5s-Mus musculus GN-Mrp8                   |
| PDHB     | Q09051   | 48 | 48 | 74463.52  | 67593.74  | 88608.8   | 60988.43  | 63775.5   | 69195.28  | 72619.49  | 79313.76  | 77891.43  | 83322.48    | 0.424488881 | 0.372133886 | 71925.998 | 74668.276 | Up                | 0.08834404253759                                                              | Pyruvate dehydrogenase E1 component subunit beta, mitochondrial O5s-Mus musculus GN-Pdhb Pe-1 Sv-1 |
| SEPT4    | P28661-3 | 6  | 6  | 249142    | 226751.33 | 417176    | 163243.33 | 234664    | 208648.33 | 226246    | 780204.83 | 256568.17 | 573311.17   | 0.425595481 | 0.371002992 | 258195.33 | 331259.7  | Up                | 0.315726101779308                                                             | isoform 3 of Septin-4 O5s-Mus musculus GN-Sept4                                                    |
| AD2D     | Q01988-3 | 5  | 5  | 26828     | 33892     | 30304.4   | 44483.4   | 23624.4   | 34186.4   | 35943.4   | 23187     | 29117.8   | 18254.4     | 0.425713651 | 0.37088424  | 32186.44  | 28451.5   | Down              | 0.193531360390781                                                             | isoform 3 of beta-actinin O5s-Mus musculus GN-Ad2d                                                 |
| HTA2A    | Q01975   | 5  | 5  | 36705.6   | 18800.8   | 12658.4   | 14372     | 21139.2   | 15756.8   | 39779.6   | 8772.2    | 18726.2   | NA          | 0.425713651 | 0.37088424  | 32186.44  | 28451.5   | Down              | 0.36491209945659                                                              | Serine protease HTA2A, mitochondrial O5s-Mus musculus GN-Htra2 Pe-1 Sv-2                           |
| CLTB     | Q06105   | 22 | 22 | 30038.18  | 31488.36  | 24299.68  | 56051.5   | 32915.32  | 42617.72  | 33628.55  | 25142.32  | 30246.68  | NA          | 0.428491439 | 0.368057941 | 34958.08  | 28753.046 | Down              | 0.281932491638372                                                             | Clathrin light chain 8 O5s-Mus musculus GN-Cltb Pe-1 Sv-1                                          |
| HNPPNL   | Q02174   | 4  | 4  | 2452      | 25598.33  | 48244     | 9701      | 29006.33  | 17009     | 22599     | 20004.33  | 38008.67  | 118080      | 0.428491439 | 0.368057941 | 34958.08  | 28753.046 | Down              | 0.678760063162614                                                             | Heterogeneous nuclear ribonucleoprotein L-like O5s-Mus musculus GN-Hnppnl Pe-1 Sv-3                |
| FNBP1    | Q08707-4 | 3  | 3  | 43886.33  | 58599.67  | 47876.33  | 49546.67  | 44807.33  | 54903     | 10771     | 36526.67  | 51914     | 20483.67    | 0.429038696 | 0.36698396  | 48943.26  | 45980.868 | Down              | 0.187415757804882                                                             | isoform 4 of Formin-binding protein 1 O5s-Mus musculus GN-Fnbp1                                    |
| WDR13    | Q01909   | 8  | 8  | 30672     | 40562.88  | 34957     | 32182.88  | 31584.88  | 34891.5   | 35768.62  | 16170.12  | 45427.12  | NA          | 0.430005036 | 0.366456884 | 33991.828 | 27413.096 | Down              | 0.310322675190144                                                             | WD repeat-containing protein 13 O5s-Mus musculus GN-Wdr13 Pe-1 Sv-1                                |
| UZF1A    | Q07833   | 2  | 2  | 8852.15   | 92045.5   | 70512     | 78839.5   | 71085     | 67536     | 72740.5   | 20097     | 92092     | NA          | 0.430030216 | 0.36599636  | 71901.1   | 16468.873 | Up                | 0.29107492406469                                                              | Sedling factor UZF1 35 kDa subunit O5s-Mus musculus GN-Uzf1 Pe-1 Sv-4                              |
| DLG4     | Q81100-3 | 18 | 18 | 47703.46  | 47511.39  | 38529.84  | 54314.78  | 54807     | 52960     | 29285.67  | 51996.67  | 25303.61  | 0.43013716  | 0.36599636  | 71901.1     | 16468.873 | Up        | 0.185731355277545 | isoform 3 of Disk large homolog 4 O5s-Mus musculus GN-Dlg4                    |                                                                                                    |
| PEZ2     | Q06105   | 5  | 5  | 8480.12   | 26089     | 109216    | 62120     | 42843.5   | 39934.2   | 27197     | 88979     | 138674    | 61197       | 0.43013716  | 0.36599636  | 71901.1   | 16468.873 | Up                | 0.423688477700662                                                             | Y-box expression factor 2 O5s-Mus musculus GN-Pez2 Pe-1 Sv-1                                       |
| TBCA     | Q64818   | 5  | 5  | 70082.25  | 68899     | 51556.12  | 38899.75  | 61305.5   | 42848.88  | 53800.25  | 37317.12  | 79990.75  | 37844       | 0.431341744 | 0.36418051  | 58262.54  | 50112.4   | Down              | 0.21876558625012                                                              | Tubulin-specific chaperone A O5s-Mus musculus GN-Tbca Pe-2 Sv-3                                    |
| CLTB     | Q64818-2 | 12 | 12 | 3712      | 3712      | 42271.08  | 34078.75  | 42137.92  | 45100.08  | 34130.92  | 37377.42  | 44004.92  | 0.431341744 | 0.36418051  | 58262.54    | 50112.4   | Down      | 0.320704848419229 | isoform 2 of Clathrin light chain 8 O5s-Mus musculus GN-Cltb                  |                                                                                                    |
| MRP2     | Q06105   | 6  | 6  | 65494.67  | 75142.62  | 64909.67  | 50264     | 63907.62  | 59313.62  | 10576.67  | 47981.62  | 35691.62  | 59682       | 0.431341744 | 0.36418051  | 58262.54  | 50112.4   | Down              | 0.6298169235                                                                  | 39S ribosomal protein L2, mitochondrial O5s-Mus musculus GN-Mrp2 Pe-2 Sv-1                         |
| PFMD1    | Q08707-4 | 2  | 2  | 72401.5   | 91781     | 101024.5  | 154908.5  | 62064     | 124172.5  | 12095.5   | 92825.5   | 102414    | 0.431341744 | 0.36418051  | 58262.54    | 50112.4   | Down      | 0.254327378805    | myofibrin subunit 1 O5s-Mus musculus GN-Pfmd1 Pe-2 Sv-1                       |                                                                                                    |
| GPMB8    | P35803-8 | 2  | 2  | 637       | 3205.5    | 1300      | 5990.5    | 6437      | 5706.5    | 6670      | 2031.5    | 2640      | NA          | 0.432142108 | 0.364373414 | 3016      | 4262      | Up                | 0.498894164514039                                                             | isoform 8 of Neuronal membrane glycoprotein M5-b O5s-Mus musculus GN-Gpmb8                         |
| MRLP13   | Q01902   | 2  | 2  | 32619.5   | 35390     | 32435     | 59809     | 28627.5   | 12085     | 22340.5   | 71899.5   | 51903     | 0.432290594 | 0.364123842 | 27776.2     | 38012.7   | Up        | 0.452803039221064 | 39S ribosomal protein L13, mitochondrial O5s-Mus musculus GN-Mrlp13 Pe-2 Sv-1 |                                                                                                    |
| ADA2D    | Q02174   | 16 | 16 | 39103.67  | 39338.33  | 40005.67  | 34570.62  | 44640.8   | 45058.74  | 44333     | 40690.87  | 50981.47  | 61973.4     | 0.432290594 | 0.364123842 | 27776.2   | 38012.7   | Up                | 0.126598519824661                                                             | Scicle tail protein O5s-Mus musculus GN-Ada2d Pe-1 Sv-1                                            |
| ADAD2    | Q24025-4 | 15 | 15 | 3945.2    | 39338.33  | 40005.67  | 34570.62  | 44640.8   | 45058.74  | 44333     | 40690.87  | 50981.47  | 61973.4     | 0.432290594 | 0.364123842 | 27776.2   | 38012.7   | Up                | 0.42410012102618                                                              | isoform 4 of Seric tail protein O5s-Mus musculus GN-Adad2                                          |
| ARMCS    | Q88800   | 2  | 2  | 27679.5   | 26736     | 19086.5   | 40815.5   | 29206     | 42009.5   | 45932.5   | 22201     | 28175     | NA          | 0.432517389 | 0.363996428 | 28704.7   | 34075.3   | Up                | 0.24761719138677                                                              | Armadillo repeat-containing protein 6 O5s-Mus musculus GN-Armcd6 Pe-2 Sv-1                         |
| RP529    | P62274   | 2  | 2  | 16709.5   | 174668.5  | 264672.5  | 106205    | 146471.5  | 141719.5  | 396492.5  | 224009.5  | 162296.5  | 0.432517389 | 0.363996428 | 28704.7     | 34075.3   | Up        | 0.33682004160463  | 40S ribosomal protein S29 O5s-Mus musculus GN-Rp529 Pe-2 Sv-2                 |                                                                                                    |
| ANXA5    | Q61655   | 3  | 3  | 14870     | 18547.33  | 31965.67  | 19983.33  | 18414     | 17347.67  | 22930.67  | 22579.33  | 34688.67  | 0.431404871 | 0.363102093 | 27076.066   | 24217.802 | Up        | 0.21617807369113  | ATP-dependent RNA helicase HDX19A O5s-Mus musculus GN-Anxa5 Pe-2 Sv-2         |                                                                                                    |
| DNX1     | Q06105   | 12 | 12 | 50059.67  | 47505.33  | 36283     | 39900.33  | 42902     | 7429.33   | 42981.83  | 35630.83  | 42741     | NA          | 0.431404871 | 0.363102093 | 27076.066 | 24217.802 | Up                | 0.421361649516812                                                             | ATP-dependent RNA helicase HDX19A O5s-Mus musculus GN-Dnx1 Pe-2 Sv-2                               |
| ANXA9    | P48036   | 3  | 3  | 17064.33  | 19659     | 21057.67  | 30076     | 18167.67  | 20827.67  | 38469.33  | 2424.33   | 15264.33  | 0.431404871 | 0.363102093 | 27076.066   | 24217.802 | Up        | 0.2384900506087   | Annexin A5 O5s-Mus musculus GN-Anxa9 Pe-1 Sv-1                                |                                                                                                    |
| MAG      | P20917   | 2  | 2  | 42514     | 83122.5   | 58605     | 93062     | 83062     | 83525.5   | 71447.5   | 41321     | 34145     | NA          | 0.433971508 | 0.362518782 | 68401     | 57893.4   | Down              | 0.241447981239913                                                             | Myelin-associated glycoprotein O5s-Mus musculus GN-Mag Pe-1 Sv-2                                   |
| RASG1    | Q02768   | 10 | 10 | 28111.44  | 4751.67   | 36204.56  | 42710.67  | 54876     | 57354.22  | 71445.44  | 52475.15  | 52895.56  | 17981.78    | 0.434545319 | 0.362084551 | 42136.86  | 50707.212 | Up                | 0.26710815422467                                                              | RasGAP-activating protein 1 O5s-Mus musculus GN-Rasg1 Pe-2 Sv-2                                    |
| CAAC     | P21578   | 2  | 2  | 32087     | 17495.5   | 56623.5   | 18124     | 2359      | 5134      | 20931.5   | 3671.5    | 51479.5   | NA          | 0.434545319 | 0.362084551 | 42136.86  | 50707.212 | Up                | 0.2421012102618                                                               | isoform 1 of Seric tail protein O5s-Mus musculus GN-Caac                                           |
| CACNA2D  | Q09246-4 | 1  | 1  | NA        | 1914      | NA        | 5930      | 4018      | 7991      | 5957.5    | NA        | 2841      | NA          | 0.435308752 | 0.361302062 | 3947.3333 | 5596.1333 | Up                | 0.50360342991672                                                              | isoform 3 of Voltage-dependent L-type calcium channel subunit alpha-1D O5s-Mus musculus GN-Cacna2d |
| PURK     | Q88466   | 4  | 4  | 39938     | 40271.25  | 16313.5   | 79777.5   | 43412.75  | 50206.25  | 49315.75  | 43667.25  | 40548.75  | NA          | 0.435308752 | 0.361302062 | 3947.3333 | 5596.1333 | Up                | 0.39848496514054                                                              | Purkinje cell element-binding protein gamma O5s-Mus musculus GN-Purk Pe-2 Sv-1                     |
| PPP1R12A | Q08872-2 | 4  | 4  | 47944.25  | 50987.5   | 56443.75  | 50833.75  | 50833.75  | 44124.5   | 46047.25  | 29114.75  | 63152.25  | NA          | 0.436031051 | 0.360510515 | 47336.5   | 40336.73  | Down              | 0.22918102437992                                                              | isoform 2 of Protein phosphatase 1 regulatory subunit 12A O5s-Mus musculus GN-Ppp1r12a             |
| PRKRG12  | Q06105   | 41 | 41 | 10046.66  | 80527.67  | 95157.07  | 95157.07  | 95157.07  | 104367.67 | 14891.67  | 84        |           |             |             |             |           |           |                   |                                                                               |                                                                                                    |

|             |          |     |     |           |           |           |           |           |           |           |           |           |             |             |             |           |           |                   |                                                                            |                                                                                                             |
|-------------|----------|-----|-----|-----------|-----------|-----------|-----------|-----------|-----------|-----------|-----------|-----------|-------------|-------------|-------------|-----------|-----------|-------------------|----------------------------------------------------------------------------|-------------------------------------------------------------------------------------------------------------|
| CNST        | C0BC84   | 1   | 1   | 2752      | 6510      | NA        | 17969     | 6294      | 13861     | 9512      | NA        | NA        | 0.449313326 | 0.347450894 | 13668       | 75        | 11691     | Up                | 0.482314281791158                                                          | Consorin O5-Mus-musculus GN-Cnst P1-SV1                                                                     |
| HADHB       | O09Y0    | 13  | 13  | 76322     | 150669    | 80925.31  | 31649.54  | 63997.23  | 8586.38   | 64223.23  | 121021.23 | 65550.69  | 69653.62    | 0.347272801 | 0.347272801 | 64392.184 | 75783.83  | Up                | 0.2372466931626                                                            | Trifunctional enzyme subunit beta, mitochondrial O5-Mus-musculus GN-Hadhb P1-SV1                            |
| PLD4A1      | P03036   | 8   | 8   | 15925.29  | 32221.86  | 24662.71  | 35176.39  | 49955.14  | 37187.25  | 46551.93  | 33138.71  | 29300.14  | 25686.29    | 0.346911472 | 0.346911472 | 30065.858 | 34311.172 | Up                | 0.18126145778173                                                           | Phenyl-A1 O5-Mus-musculus GN-Plnd P1-SV1                                                                    |
| P70122      | 43808    | 1   | 1   | 43808     | 43797     | 23525     | 43429.5   | 23525     | 43429.5   | 23525     | 43429.5   | 23525     | 43429.5     | 0.345054295 | 0.345054295 | 38996     | 32683.3   | Down              | 0.25383316887952                                                           | Ribosome maturation protein S80S O5-Mus-musculus GN-S80s P1-SV4                                             |
| DMTN        | Q9WV69-4 | 16  | 16  | 66834.93  | 85922.07  | 46497.73  | 67986.8   | 71264.33  | 65620.67  | 64607.47  | 52860.4   | 66786.93  | 25528.6     | 0.450260685 | 0.346535827 | 62301.172 | 50580.814 | Down              | 0.177709423070498                                                          | Adaptor 4 of Derman O5-Mus-musculus GN-Dmtn                                                                 |
| UCHL4       | P58311   | 2   | 2   | 20511.5   | 26007.5   | 9163.5    | 21083     | 24038     | 30458.5   | 20075     | 21307     | 20166.5   | NA          | 0.450506826 | 0.346239399 | 19967.7   | 23001.75  | Up                | 0.2043676565281                                                            | Ubiquitin carboxyl-terminal hydrolase isozyme 14 O5-Mus-musculus GN-Uchl4 P1-SV1                            |
| TUBB2B      | Q0C4W2   | 126 | 126 | 67079.79  | 74660.87  | 61136.18  | 86219.74  | 75371.1   | 67331.42  | 64292     | 66391.69  | 64507.708 | 64292       | 0.450506826 | 0.346637071 | 65469.702 | 63442.184 | Down              | 0.1813666044458                                                            | Tubulin beta-3B chain O5-Mus-musculus GN-Tubb2b P1-SV1                                                      |
| RTNBP1      | P53111-1 | 1   | 1   | 49761     | 53140     | 69641     | 73134     | 104724    | 81724     | NA        | 54583     | NA        | NA          | 0.450506826 | 0.345693022 | 67124.6   | 72781.7   | Down              | 0.334289550585959                                                          | Phosphatidylethanol transfer protein beta isoform O5-Mus-musculus GN-Rtnbp1 P1-SV2                          |
| SEPT5       | Q0Z7C6   | 28  | 28  | 160991.21 | 154699.71 | 183907.25 | 154558.14 | 160106.86 | 150754.18 | 158301.93 | 137284.96 | 170264.25 | 204357.82   | 0.451056173 | 0.345769177 | 162823.61 | 171392.63 | Up                | 0.073915191688899                                                          | Septin-5 O5-Mus-musculus GN-Sept5 P1-SV1                                                                    |
| ACN1        | Q0108-3  | 1   | 1   | 22507     | 22967     | 19282     | 23451     | 23557     | 30883     | 26100     | 19610     | 21421     | NA          | 0.451144877 | 0.345114877 | 22270.8   | 24593.1   | Down              | 0.1378445100812                                                            | Isoform 3 of Apoptotic chromatin condensation inducer in the nucleus O5-Mus-musculus GN-Acn1                |
| NUIT2       | P51371   | 1   | 1   | 26885     | 26125     | NA        | 7820      | 19782     | 18852     | 21190     | NA        | 25492     | 48468       | 0.85111521  | 0.34517251  | 20151     | 27234.75  | Up                | 0.43446036172494                                                           | Nucleolar transport factor 2 O5-Mus-musculus GN-Nuit2 P1-SV1                                                |
| NEOT1       | Q0847    | 1   | 1   | NA        | NA        | NA        | 6770      | 1059      | 678       | NA        | 4900      | NA        | NA          | 0.345042106 | 0.345042106 | 3441      | 5334      | Up                | 0.15111180471705                                                           | Neurogranin and tolloid like protein 1 O5-Mus-musculus GN-Neot1 P1-SV1                                      |
| RUBML2      | Q9WMT5   | 2   | 2   | 16223     | 18464.5   | 1543      | 13363.5   | 13433     | 18782     | 18517     | 6238.5    | 21491     | NA          | 0.365177712 | 0.345177712 | 12658.8   | 16257.125 | Up                | 0.36093149551008                                                           | Rub-like factor 2 O5-Mus-musculus GN-Rubml2 P1-SV1                                                          |
| MRPS35      | O0B424   | 3   | 3   | 113512.67 | 141853    | 118822.33 | 77163     | 100535.33 | 101827    | 131573    | 80782     | 137357.67 | 174523.33   | 0.450206418 | 0.344799973 | 110377.27 | 125616.12 | Up                | 0.186538129816401                                                          | 28S ribosomal protein S35, mitochondrial O5-Mus-musculus GN-Mrps35 P1-SV2                                   |
| VPS4B       | O06647   | 1   | 1   | 39960     | 35125     | 42086     | 27784     | 39881     | 41026     | 45297     | 31824     | 27730     | NA          | 0.344607622 | 0.344607622 | 38993     | 33978.75  | Down              | 0.124083920513285                                                          | Vacuolar protein sorting-associated protein 48 O5-Mus-musculus GN-Vps4b P1-SV2                              |
| SNDP        | O0C235-3 | 49  | 49  | 54099.54  | 69490.88  | 58168.88  | 25339.06  | 51889.15  | 36461.85  | 34607.35  | 60512.4   | 60877.35  | NA          | 0.343084941 | 0.343084941 | 47951.302 | 5420.454  | Down              | 0.185125542092314                                                          | Isoform 2 of Synaptotagmin O5-Mus-musculus GN-Sndp                                                          |
| DZAP1       | Q0105    | 5   | 5   | 82040     | 67198.6   | 69184.2   | 45475.2   | 67645.8   | 50195.4   | 54411.4   | 66763.4   | 64588.4   | 68184.6     | 0.453194061 | 0.34371579  | 63608.76  | 60818.64  | Down              | 0.124685920466562                                                          | DAZ-associated protein 1 O5-Mus-musculus GN-Dzap1 P1-SV2                                                    |
| DLGAP4      | 81A2P2-2 | 23  | 23  | 36964.86  | 35174.1   | 22616.29  | 34440.52  | 38976.24  | 35912.14  | 35564     | 27648.71  | 32667.1   | 20566.95    | 0.453207668 | 0.343707446 | 63304.402 | 30389.78  | Down              | 0.146353177292407                                                          | Isoform 2 of Disks large-associated protein 4 O5-Mus-musculus GN-Dlgap4                                     |
| TPRNGL      | O08062   | 1   | 1   | 23599     | NA        | NA        | 3323      | 1843      | 3509      | 2621      | NA        | NA        | NA          | 0.453354723 | 0.343561855 | 2521.6667 | 3005      | Up                | 0.28150492195201                                                           | Tumor protein p53-regulated gene 1-like protein O5-Mus-musculus GN-Tprngl P1-SV1                            |
| UBN1        | Q02212   | 2   | 2   | 34748     | 45567     | 27022     | 46494.5   | 60040     | 50954     | 74521.5   | 16780.5   | 57822.5   | NA          | 0.453201744 | 0.343201744 | 42724.5   | 54021.875 | Up                | 0.33679272315796                                                           | Ubiquitin domain-containing protein 1 O5-Mus-musculus GN-Ubn1 P1-SV1                                        |
| NLGN1       | O09X10   | 1   | 1   | NA        | NA        | NA        | 19251     | 17403     | 20884     | 2164      | 16543     | NA        | NA          | 0.453770612 | 0.343770612 | 16977     | 19522.667 | Up                | 0.20156858567615                                                           | Neuregulin-1 O5-Mus-musculus GN-Nlgn1 P1-SV2                                                                |
| CSMK2A1     | Q06737-4 | 4   | 4   | 30183.25  | 31183     | 30766.75  | 38427.25  | 34955.25  | 45481     | 41663.25  | 5024.75   | 32388.5   | 3391.25     | 0.454026406 | 0.342093364 | 33103.3   | 25589.75  | Down              | 0.371408995023417                                                          | Casikin kinase II subunit alpha O5-Mus-musculus GN-Csmk2a1 P1-SV2                                           |
| RAGEF2      | O08C67   | 21  | 21  | 21807.81  | 29180.95  | 16920.33  | 36867.43  | 37207.81  | 40071.14  | 48624.95  | 20371.81  | 43621.95  | 21540.67    | 0.454026406 | 0.34241763  | 28795.866 | 34054.377 | Up                | 0.241578312898078                                                          | Rap guanine nucleotide exchange factor 2 O5-Mus-musculus GN-Ragef2 P1-SV2                                   |
| SUGT1       | O09VU5   | 20  | 20  | 173047.51 | 167360.75 | 172719.2  | 170708.45 | 149923.1  | 149619.77 | 143455.05 | 196173.95 | 168064.55 | 175167.1    | 0.342727007 | 0.342727007 | 166311.15 | 18571.79  | Up                | 0.159739734755485                                                          | Succinyl-CoA ligase (ADP-forming) subunit alpha, mitochondrial O5-Mus-musculus GN-Sugt1 P1-SV4              |
| RFXO3       | O0943-3  | 1   | 1   | 3279      | 1283      | 2047      | 2661      | 1718      | 2635      | NA        | 5906      | NA        | 0.455192861 | 0.341804557 | 2787.6      | 3721.3333 | Up        | 0.436431602008003 | Isoform 3 of RNA binding protein for 3 homologs 1 O5-Mus-musculus GN-Rfxo3 |                                                                                                             |
| KPR1        | O0Z0U0   | 1   | 1   | 649       | 1033      | NA        | 4521      | 1649      | 3719      | 3592      | NA        | NA        | NA          | 0.341760633 | 0.341760633 | 2010.75   | 2929.667  | Up                | 0.5430028061406                                                            | Xenotropic and polytropic retrovirus receptor 1 O5-Mus-musculus GN-Kpr1 P1-SV1                              |
| P72821      | B0E181   | 13  | 13  | 48392     | 60646     | 90379.77  | 34988.54  | 40987.08  | 47281.08  | 53922.38  | 74596     | 68929.15  | 8523.08     | 0.455188508 | 0.341620474 | 56871.57  | 60992.338 | Up                | 0.21650899903412                                                           | Receptor-type tyrosine protein phosphatase zeta O5-Mus-musculus GN-P72821 P1-SV1                            |
| APFS        | P08684   | 1   | 1   | 20743.5   | 20505.5   | 14137.5   | 25484     | 26098     | 25624     | 30718.5   | 24506     | 29183.5   | NA          | 0.455675837 | 0.340887842 | 23166.7   | 27171.75  | Down              | 0.340887842                                                                | APC-lysozymal factor 5 O5-Mus-musculus GN-Apfs P1-SV2                                                       |
| TPI1        | P09449   | 17  | 17  | 22563.62  | 24838.08  | 18286.46  | 25983.25  | 26883.25  | 25082.25  | 26032.8   | 11459.31  | 25064.8   | 28668.08    | 0.455675837 | 0.340887842 | 22564.8   | 22564.8   | Down              | 0.274974211551315                                                          | Triosephosphate isomerase O5-Mus-musculus GN-Tpi1 P1-SV1                                                    |
| PP2CB       | P62715   | 4   | 4   | 10682.75  | 15219.5   | 19733.25  | 26178.75  | 20686.25  | 17882.5   | 32675     | 9401      | 14091     | 4541.75     | 0.456670306 | 0.340039862 | 18042.1   | 14526.25  | Down              | 0.317209555505438                                                          | Serin/threonine protein phosphatase 2A catalytic subunit beta isoform O5-Mus-musculus GN-Pp2cb P1-SV1       |
| AFG3L2      | O08102   | 2   | 2   | 16832.1   | 23436.7   | 22743.5   | 28449.8   | 26891.5   | 37089.5   | 62014.6   | 32914.7   | 18100.4   | 0.456670306 | 0.340130856 | 25736.64    | 79545.86  | Down      | 0.19913275032053  | AFG3-like protein 2 O5-Mus-musculus GN-Afg3l2 P1-SV1                       |                                                                                                             |
| UMAI        | O08469   | 2   | 2   | 30949     | 44716.6   | 23094.5   | 32094.5   | 26047.5   | 34997.5   | 31996.7   | NA        | NA        | NA          | 0.456670306 | 0.340130856 | 25736.64  | 79545.86  | Down              | 0.340130856                                                                | UM domain and actin-binding protein 1 O5-Mus-musculus GN-Umai P1-SV3                                        |
| KLC2        | O08448   | 16  | 16  | 40166.85  | 45562.15  | 41091     | 41149.54  | 42945     | 46213.54  | 48484.9   | 70064.15  | 51790.08  | NA          | 0.339942422 | 0.339942422 | 43425.708 | 33138     | Down              | 0.20463457555152                                                           | Green-light chain 2 O5-Mus-musculus GN-Klc2 P1-SV1                                                          |
| SLC3A3R1    | P70441-2 | 1   | 1   | 32922     | 25479     | 56880     | 20916     | 22221     | 29484     | 19226     | 60920     | 29723     | 73305       | 0.457290411 | 0.338987905 | 38178     | 42755.35  | Up                | 0.418827650342771                                                          | Isoform 2 of Na+/H+O exchange regulatory co-locator NHE-RF1 O5-Mus-musculus GN-Slc3a3r1                     |
| TMIMB2A     | O4F267   | 1   | 1   | 11793.91  | 79298     | 147385    | 42959     | 72973     | 60741     | 106396    | 159850    | 115568    | 94989.5     | 0.457450426 | 0.339652526 | 91038.8   | 105918.8  | Up                | 0.265595407988213                                                          | Putative mitochondrial import inner membrane translocase subunit Timb A-B O5-Mus-musculus GN-Timmb2a P1-SV1 |
| OGDH        | O06097-9 | 21  | 21  | 82547.86  | 108488.33 | 69687.05  | 110266.05 | 122609    | 126631.81 | 143682    | 82089.43  | 15859.9   | NA          | 0.457450426 | 0.339652526 | 98797.638 | 130815.53 | Up                | 0.16584857762465                                                           | Isoform 2 of 2-oxoglutarate dehydrogenase, mitochondrial O5-Mus-musculus GN-Ogdh                            |
| TCR2        | O07113   | 2   | 2   | 1474      | 4843.5    | 1213      | 1474      | 4843.5    | 1213      | 1474      | 4843.5    | 1213      | NA          | 0.457450426 | 0.339652526 | 98797.638 | 130815.53 | Up                | 0.16584857762465                                                           | Isoform 2 of 2-oxoglutarate dehydrogenase, mitochondrial O5-Mus-musculus GN-Ogdh                            |
| PKRSH       | O08795   | 17  | 17  | 40984.5   | 50310.07  | 32150.64  | 65448.5   | 46224.43  | 50849.07  | 50965.21  | 41975.21  | 43130.29  | 16615.5     | 0.458921245 | 0.338518367 | 47023.628 | 40507.058 | Down              | 0.21521615466379                                                           | Glucosidase 2 subunit beta O5-Mus-musculus GN-Pkrsh P1-SV1                                                  |
| RASBP2      | O0B0Y8   | 1   | 1   | NA        | NA        | NA        | 5027      | 3355      | 3355      | 4884      | NA        | NA        | NA          | 0.458921245 | 0.338518367 | 47023.628 | 40507.058 | Down              | 0.21521615466379                                                           | G-protein coupled receptor-associated sorting protein 2 O5-Mus-musculus GN-Rasbp2 P1-SV2                    |
| ITIR        | O0C0W4   | 22  | 22  | 78381.45  | 81092.68  | 59902.55  | 71505.32  | 80544.23  | 77555.23  | 78298.18  | 63821     | 78823     | 16822.95    | 0.459282127 | 0.337819425 | 74205.246 | 67064.072 | Down              | 0.145081099518746                                                          | Election transfer flavonolignolase subunit alpha O5-Mus-musculus GN-Itir P1-SV1                             |
| AMPH        | Q17077   | 46  | 46  | 102651    | 127271.51 | 100963.04 | 168825.02 | 120720.89 | 128256.93 | 127624.04 | 109330.16 | 119302.98 | NA          | 0.459282127 | 0.337819425 | 74205.246 | 67064.072 | Down              | 0.145081099518746                                                          | Election transfer flavonolignolase subunit alpha O5-Mus-musculus GN-Itir P1-SV1                             |
| DACT3       | O0PHV7   | 7   | 7   | 6210.8    | 9367.8    | 4126.6    | 6977.4    | 7236      | 8789      | 8471.4    | 9495.4    | 14494.8   | 1549.2      | 0.460124144 | 0.337039997 | 6781.72   | 8559.96   | Up                | 0.335527431606066                                                          | Dagger homolog 3 O5-Mus-musculus GN-Dact3 P1-SV1                                                            |
| PIPR1       | O64455   | 1   | 1   | NA        | NA        | NA        | 9625      | 959       | 6005      | 7422      | NA        | NA        | NA          | 0.460124144 | 0.337039997 | 6781.72   | 8559.96   | Up                | 0.335527431606066                                                          | Receptor-type tyrosine protein phosphatase eta O5-Mus-musculus GN-Pipr1 P1-SV2                              |
| GRK7        | O08474   | 4   | 4   | 24525.85  | 27491.75  | 19340     | 17338.25  | 2771      | 2839      | 3219      | 10520.25  | 27651     | 17096.5     | 0.460124144 | 0.337039997 | 6781.72   | 8559.96   | Up                | 0.335527431606066                                                          | Adaptor protein tyrosine kinase-associated protein 178 O5-Mus-musculus GN-Grk7 P1-SV2                       |
| GRK2        | O09M81   | 2   | 2   | 1171      | 3284      | NA        | 7606      | 1647      | 5332      | 4118      | NA        | NA        | NA          | 0.461375282 | 0.335945686 | 3427      | 4775      | Down              | 0.46138714746623                                                           | Beta-adrenergic receptor kinase 1 O5-Mus-musculus GN-Grk2 P1-SV2                                            |
| DMTN        | Q9WV69-3 | 18  | 18  | 55079.46  | 50618.61  | 39943.72  | 57786.67  | 60901.28  | 56261.56  | 55372.22  | 49180.98  | 52761.11  | 38761.11    | 0.455188508 | 0.335945686 | 3427      | 4775      | Down              | 0.175907278994648                                                          | Adaptor 4 of Derman O5-Mus-musculus GN-Dmtn                                                                 |
| FAM127A     | O08863   | 4   | 4   | 9368.5    | 11603.5   | 1721.5    | 16724.5   | 11318     | 13455.5   | 11816.5   | NA        | 11240.5   | NA          | 0.461375282 | 0.335945686 | 3427      | 4775      | Down              | 0.175907278994648                                                          | Protein FAM127A O5-Mus-musculus GN-Fam127a P1-SV2                                                           |
| ZORNOXO2RHK | O08863   | 4   | 4   | 9368.5    | 11603.5   | 1721.5    | 16724.5   | 11318     | 13455.5   | 11816.5   | NA        | 11240.5   | NA          | 0.46137528  |             |           |           |                   |                                                                            |                                                                                                             |

|              |           |    |          |           |           |           |           |           |           |           |           |             |             |             |             |           |                   |                                                                                                    |                                                                                                        |                                                                                             |
|--------------|-----------|----|----------|-----------|-----------|-----------|-----------|-----------|-----------|-----------|-----------|-------------|-------------|-------------|-------------|-----------|-------------------|----------------------------------------------------------------------------------------------------|--------------------------------------------------------------------------------------------------------|---------------------------------------------------------------------------------------------|
| 940220K01K1R | Q5D7N6    | 4  | 4        | 7722.75   | 12224.75  | 12222.75  | 7019.75   | 132272    | 4563.75   | 11454.75  | 12152     | 0.48292494  | 0.31611832  | 9019.5      | 10353.05    | Up        | 0.189936482744312 | Functional protein associated with coronary artery disease in OS-Mus-musculus GN-ncad Pe1 Sv-2     |                                                                                                        |                                                                                             |
| VARS         | 02K10L    | 3  | 3        | 3286      | 25508.5   | 45699     | 18309     | 33033.5   | 41091.5   | NA        | 19949     | NA          | 0.48278948  | 0.31607268  | 23200.625   | 31.35     | Up                | 0.43466877270484                                                                                   | Junctin-1 RNA ligase OS-Mus-musculus GN-Pe2 Sv-1                                                       |                                                                                             |
| PRAR2B       | P31124    | 26 | 26       | 31626.92  | 32947.58  | 27862.42  | 35136.87  | 31399.29  | 35097.75  | 33672.54  | 25070.24  | 0.483172126 | 0.31580969  | 31793.75    | 29391.42    | Down      | 0.12346612165367  | CAAMP-dependent protein kinase type II beta regulatory subunit OS-Mus-musculus GN-Ptar2b Pe-1 Sv-3 |                                                                                                        |                                                                                             |
| ATAD3A       | Q29J1-2   | 8  | 8        | 46937.8   | 52493.5   | 41258.38  | 50556.25  | 54588.02  | 60777.08  | 51563.25  | 34335.88  | 47185.88    | 29981       | 0.315455815 | 49213.9     | 45523.73  | Down              | 0.1443229388603                                                                                    | Isomorph AAL domain-containing protein 3 OS-Mus-musculus GN-Atad3                                      |                                                                                             |
| NUF1S1       | Q91V09    | 41 | 41       | 93126.92  | 98117.82  | 80398.85  | 79411.7   | 87098.72  | 100122.08 | 86077.85  | 68500.95  | 85597.13    | 68497.13    | 0.48373918  | 87655.282   | 82324.04  | Down              | -0.0921051808367128                                                                                | NADH-ubiquinone oxidoreductase 7 kDa subunit, mitochondrial OS-Mus-musculus GN-Nuf1S1 Pe-1 Sv-2        |                                                                                             |
| RLP13        | PE2900    | 9  | 9        | 10920.94  | 116825.44 | 95541.89  | 117184.76 | 98533.22  | 105407.22 | 113872.44 | 79162.22  | 128295.89   | 44948       | 0.48446496  | 100011.13   | 94337.154 | Down              | 0.16831784182444                                                                                   | 60S ribosomal protein L31 OS-Mus-musculus GN-Rlp13 Pe-1 Sv-1                                           |                                                                                             |
| RLP17        | 6         | 6  | 20130.95 | 309999.81 | 262725.5  | 258181.3  | 315511.2  | 300213.3  | 307145.3  | 301491.69 | 407431.67 | 404919.4    | NA          | 0.47724531  | 31476.93    | 31762.47  | Down              | 0.1131011301276742                                                                                 | 60S ribosomal protein L13 OS-Mus-musculus GN-Rlp17 Pe-1 Sv-2                                           |                                                                                             |
| NUF5R        | Q8H101    | 36 | 36       | 49255.38  | 49302.15  | 42008.11  | 53205.25  | 51222.72  | 46025.14  | 40090.25  | 42834.22  | 43135.5     | 0.483465519 | 0.31478422  | 48111.378   | 46338.47  | Down              | 0.052427230971838                                                                                  | NADH dehydrogenase [ubiquinol]-iron-sulfur protein 8, mitochondrial OS-Mus-musculus GN-Nuf5R Pe-1 Sv-1 |                                                                                             |
| PEX1         | Q8C437    | 3  | 6        | 12540.81  | 15128.67  | 10845     | 17362.67  | 17183.67  | 12074.12  | 14645.5   | 18701.17  | 19275.5     | 10292.8     | 0.48479887  | 0.314438655 | 14672.168 | 16124.968         | Down                                                                                               | 0.13621423415044                                                                                       | PEX5-related protein OS-Mus-musculus GN-Pex1 Pe-1 Sv-2                                      |
| BCKDHA       | P50136    | 3  | 3        | 31415     | 14540.67  | 6510.33   | 12404     | 12755     | 14134     | 11297     | 13128     | 13011.67    | 6423.33     | 0.48512784  | 11425       | 5998.8    | Down              | 0.251268202489019                                                                                  | 2-oxoisovalerate dehydrogenase subunit alpha, mitochondrial OS-Mus-musculus GN-Bckdha Pe-1 Sv-1        |                                                                                             |
| NCL          | P04965    | 12 | 12       | 20620.25  | 20775.92  | 16737.88  | 22260.25  | 20278.75  | 17178.75  | 21683.38  | 16518.25  | 21509.58    | 11562.44    | 0.48602498  | 20420.25    | 18602.86  | Down              | 0.121518094191721                                                                                  | Nucleolin OS-Mus-musculus GN-Ncl Pe-1 Sv-2                                                             |                                                                                             |
| SLP          | Q0877-2   | 5  | 5        | 82968.4   | 8789.8    | 74511     | 91965.4   | 85507.8   | 93521.6   | 79554     | 91483.6   | 105504.2    | 76644.2     | 0.486162113 | 0.311311951 | 89341.52  | Down              | 0.074165811510064                                                                                  | Isomorph 2 of SRA stem-loop-interacting RNA binding protein OS-Mus-musculus GN-Slp                     |                                                                                             |
| MUT          | P14632    | 5  | 5        | 7608.2    | 10064.4   | 9777.2    | 13014     | 11647     | 14732.8   | 13213.2   | 12543.4   | 4957        | 0.48625794  | 0.31310984  | 10260.25    | 11957.76  | Down              | 0.19216304025573                                                                                   | Methylmalonyl-CoA mutase, mitochondrial OS-Mus-musculus GN-Mut Pe-1 Sv-2                               |                                                                                             |
| GRN1         | P35438-2  | 3  | 3        | 17895.67  | 18758.33  | 48586.33  | 17750.67  | 35322.67  | 26305     | 32209.67  | 60158.67  | 33847.33    | 19545.33    | 0.48627003  | 0.312803776 | 27663.534 | 34653.1           | Down                                                                                               | 0.31652514420383                                                                                       | Isomorph 2 of glutamate receptor ionotropic, NMDA 1 OS-Mus-musculus GN-Grin1                |
| EIF5         | P59325    | 10 | 10       | 24354.4   | 33382.2   | 32891.3   | 55420.08  | 36159     | 39666.2   | 34759.4   | 25375.2   | 31501.2     | 21145.8     | 0.486860071 | 0.312559842 | 36441.58  | 11831.02          | Down                                                                                               | 0.1951521321778129                                                                                     | Eukaryotic translation initiation factor 5 OS-Mus-musculus GN-Eif5 Pe-1 Sv-1                |
| PLA1A        | P23449    | 4  | 4        | 88804.5   | 76745.75  | 124312.25 | 66383     | 82330.25  | 72788.5   | 64525.5   | 103856.25 | 63803.5     | 83986.25    | 0.312488992 | 87674.95    | 47884.7   | Down              | 0.15820332453522                                                                                   | Parvalbumin alpha OS-Mus-musculus GN-Pla1a Pe-1 Sv-3                                                   |                                                                                             |
| MCT52        | Q9CQ21    | 1  | 1        | 33931     | 28182     | 28201     | 106064    | 43081     | 49628     | 31759     | NA        | 18072       | NA          | 0.31198823  | 46411.8     | 31353     | Down              | 0.48535225914152                                                                                   | Malignant T-cell-amplified sequence 2 OS-Mus-musculus GN-Mct52 Pe-2 Sv-1                               |                                                                                             |
| PNN          | Q35691    | 1  | 1        | 92511     | 44879     | 48075     | 30441     | 63976     | 53092     | 47024     | 9074      | 66817       | 0.311953603 | 55976.4     | 44001.75    | Down      | 0.34725780358607  | Pinin OS-Mus-musculus GN-Pnn Pe-1 Sv-4                                                             |                                                                                                        |                                                                                             |
| MLH8         | Q8C43     | 4  | 4        | 27971     | 34640.5   | 45815     | 19023.75  | 30285.5   | 25289.75  | 31621     | 43242.5   | 37876.5     | 39492.25    | 0.48764174  | 0.311899121 | 31547.75  | 35500.8           | Down                                                                                               | 0.17031402488716                                                                                       | Myosin light chain 88 OS-Mus-musculus GN-Myh8 Pe-1 Sv-1                                     |
| FMH1         | P55322-11 | 4  | 4        | 21230.25  | 20891.75  | 20963.5   | 24199.75  | 22405     | 21339     | 22253     | 19976.75  | 27696.25    | 3885.75     | 0.487002002 | 0.311658886 | 22562.05  | 19420.15          | Down                                                                                               | 0.215051192124065                                                                                      | Isomorph 5011 of Fragile X mental retardation protein 1 homolog OS-Mus-musculus GN-Fmr1     |
| FMH1         | P55322-5  | 5  | 5        | 22320.25  | 22891.75  | 20963.5   | 24199.75  | 22405     | 21339     | 22253     | 19976.75  | 27696.25    | 3885.75     | 0.487002002 | 0.311658886 | 22562.05  | 19420.15          | Down                                                                                               | 0.215051192124065                                                                                      | Isomorph 503 of Fragile X mental retardation protein 1 homolog OS-Mus-musculus GN-Fmr1      |
| SEMA4A       | Q62178    | 2  | 2        | NA        | 6193      | NA          | 0.48855804  | 0.31084954  | 7450.3333   | 7899      | Down              | 0.269410470721968                                                                                  | Semaphorin-4A OS-Mus-musculus GN-Sema4a Pe-1 Sv-2                                                      |                                                                                             |
| HNRNP43      | Q8H605    | 26 | 26       | 120504.77 | 71885.12  | 80328.15  | 61751.81  | 84704.88  | 73789.88  | 106931.31 | 84177.88  | 70809.19    | 77704.77    | 0.489310125 | 0.310423076 | 85544.96  | 76649             | Down                                                                                               | 0.15841652823825                                                                                       | Heterogeneous nuclear ribonucleoprotein A3 OS-Mus-musculus GN-Hnnp43 Pe-1 Sv-1              |
| MAP2         | P1087-3   | 47 | 47       | 11923.89  | 11868.87  | 11522.72  | 113880.67 | 111867.04 | 107405.15 | 117104.67 | 131319.22 | 15832.09    | 109363.52   | 0.489722371 | 0.31004961  | 117458.04 | 12495.73          | Up                                                                                                 | 0.080216618991259                                                                                      | Isomorph 1a of Microtubule-associated protein tau OS-Mus-musculus GN-Map2                   |
| FCMD2        | Q31Q2N-3  | 1  | 1        | 8420      | 11686     | 6779      | 6589      | 9702      | 8890      | 9913      | NA        | 7136        | NA          | 0.490199397 | 0.309627227 | 7871.2    | 8646.1333         | Up                                                                                                 | 0.135504588189927                                                                                      | Isomorph 3 of FCH domain only protein 2 OS-Mus-musculus GN-Fcmd2                            |
| PMO1         | Q37K57    | 2  | 2        | 604       | 1526      | 684       | 7755      | 5160      | 5478      | 5044      | NA        | NA          | 0.490614662 | 0.309614662 | 7755.4      | 4061.6627 | Up                | 0.549376132709169                                                                                  | 26S proteasome non-ATPase regulatory subunit 1 OS-Mus-musculus GN-Pmo1 Pe-1 Sv-1                       |                                                                                             |
| LHDH         | Q27NG8    | 2  | 2        | 32106     | 36202.5   | 44769.5   | 27419.5   | 31387     | 23563.5   | 33734.5   | 39260.5   | 68466       | NA          | 0.490408616 | 0.30944866  | 33412.9   | 21576.127         | Up                                                                                                 | 0.304203118124419                                                                                      | Pyruvate D-lactate dehydrogenase, mitochondrial OS-Mus-musculus GN-Lhdh Pe-1 Sv-1           |
| RTT1         | Q81765    | 1  | 1        | 25219     | 18871     | 21558     | 21558     | 79241     | 11030     | 11127     | 10810     | NA          | 0.490304001 | 0.30895891  | 26484.2     | 31404     | Down              | 0.23606837050531                                                                                   | Keratin type I, keratin 8 OS-Mus-musculus GN-Rtt1 Pe-2 Sv-3                                            |                                                                                             |
| PMH1         | Q31Q2N-3  | 1  | 1        | 36019     | 31863.5   | 32420     | 45795.2   | 38857.8   | 33832.5   | 33832.5   | 40187.25  | 40187.25    | NA          | 0.490722371 | 0.3091451   | 43525.133 | Down              | 0.20210888788149                                                                                   | Isomorph 3 of FCH domain only protein 2 OS-Mus-musculus GN-Pmh1 Pe-1 Sv-1                              |                                                                                             |
| MMP33        | Q020R8    | 1  | 1        | 37201     | 64007     | 27664     | 52531     | 47014     | 38254     | 76289     | 27831     | 48912543    | NA          | 0.490657244 | 0.308657244 | 46101.2   | 55820.8           | Down                                                                                               | 0.275989469595016                                                                                      | BCL2 ribosomal protein 533, mitochondrial OS-Mus-musculus GN-Mmp33 Pe-1 Sv-1                |
| ACPY2        | P56375    | 3  | 3        | 45001     | 46081.67  | 35520     | 75141     | 45001     | 50594.67  | 45361.67  | 46240     | 47805.33    | 18637.67    | 0.49127543  | 0.308485906 | 48708.934 | 43710.88          | Down                                                                                               | 0.207393693182529                                                                                      | Acylphosphatase 2 OS-Mus-musculus GN-Acpy2 Pe-2 Sv-2                                        |
| CSX          | Q49369.36 | 35 | 35       | 43693.36  | 43508.94  | 48612.88  | 200925.42 | 340149.86 | 508788.45 | 340149.86 | 508788.45 | 37078.21    | 37078.21    | 0.49127543  | 0.308485906 | 48708.934 | 43710.88          | Down                                                                                               | 0.207393693182529                                                                                      | Cytochrome c oxidase 6b, mitochondrial OS-Mus-musculus GN-CSX Pe-1 Sv-2                     |
| RLP21        | Q05167    | 1  | 1        | 28313.98  | 33013.7   | 31233     | 22931.8   | 28253.4   | 23909.1   | 30111.8   | 29885.4   | 28193.8     | 90058.3     | 0.49185568  | 0.3083125   | 84008.94  | 31052.12          | Up                                                                                                 | 0.128771733955887                                                                                      | 60S ribosomal protein L21 OS-Mus-musculus GN-Rlp21 Pe-2 Sv-3                                |
| DP2B         | Q3UW69-2  | 1  | 1        | 407       | 1258      | 384       | 3683      | 1487      | 2635      | 3209      | 2995      | 874         | NA          | 0.49284726  | 0.308294726 | 7148.75   | 2415.75           | Down                                                                                               | 0.46647104051855                                                                                       | Isomorph 2 of Disc-interacting protein 2 homolog 8 OS-Mus-musculus GN-Dp2b                  |
| UBC          | P0C500    | 9  | 9        | 78331.89  | 128544    | 64160.22  | 63749.44  | 107032.89 | 83988.11  | 140445.33 | 105119.44 | 180339.22   | 34066       | 0.492946678 | 0.30793696  | 88633.688 | 108771.62         | Up                                                                                                 | 0.300041894716535                                                                                      | Polyubiquitin-C OS-Mus-musculus GN-Ubc Pe-1 Sv-2                                            |
| TAB9         | Q61744    | 1  | 1        | 6192      | 8272      | 6550      | 8079      | 7539      | 6028      | 3339      | NA        | 9756        | NA          | 0.492607247 | 0.307754747 | 7248.4    | 8089.68           | Down                                                                                               | 0.159353072822681                                                                                      | beta-actin-activated kinase 1 and MAPK7-binding protein 3 OS-Mus-musculus GN-Tab9 Pe-1 Sv-2 |
| CD241B       | P55517-2  | 7  | 7        | 27327.6   | 42687.86  | 38333.8   | 47891.47  | 41878.4   | 52746.13  | 49751.43  | 49331.43  | 40931.43    | 30960       | 0.49178509  | 0.30759109  | 48995.76  | 48995.76          | Down                                                                                               | 0.491785091355195                                                                                      | Isomorph 1 of type calcium channel subunit alpha-1B OS-Mus-musculus GN-CD241B Pe-1 Sv-1     |
| BBM4B        | Q8V192    | 1  | 1        | 4719      | NA        | NA        | 4754      | 5356      | 4979      | 2431      | NA        | 5194        | NA          | 0.493810135 | 0.306440001 | 4943      | 4201.3333         | Down                                                                                               | 0.2345396528439                                                                                        | RNA-binding protein 48 OS-Mus-musculus GN-Bbm4b Pe-1 Sv-1                                   |
| CDH11        | P55288    | 3  | 3        | 4029.33   | 5098      | 133       | 12585.67  | 5638.33   | 9400.33   | 65207.67  | NA        | 5978.67     | NA          | 0.493965221 | 0.306303628 | 5730.866  | 7299.89           | Down                                                                                               | 0.349121561260226                                                                                      | Cadherin-11 OS-Mus-musculus GN-Cdh11 Pe-1 Sv-1                                              |
| IMPA1        | Q50523    | 4  | 4        | 68449.25  | 81267     | 83009.25  | 90091.25  | 81347.25  | 94461.25  | 78792.25  | 67488.25  | 81863.75    | 61609.25    | 0.494109256 | 0.306148109 | 82008.8   | 77024.95          | Down                                                                                               | 0.090845454582629                                                                                      | Isomorph monophosphatase 1 OS-Mus-musculus GN-Impa1 Pe-1 Sv-1                               |
| PCD6         | Q20164    | 1  | 1        | 4116      | 4421      | 4421      | 4421      | 4421      | 4421      | 4421      | 4421      | 4421        | NA          | 0.4940126   | 0.3059126   | 4421      | 4421              | Down                                                                                               | 0.2961911145441                                                                                        | Isomorph 1 of FHL-1 OS-Mus-musculus GN-Pcd6 Pe-1 Sv-2                                       |
| BANBP9       | P69566    | 2  | 2        | 12700.5   | 19244.5   | 10170     | 18513.5   | 12077     | 15303.5   | 14731.5   | 14436     | 12615.5     | 41432       | 0.4942456   | 0.306057189 | 143407    | 18797.1           | Down                                                                                               | 0.3898913988756                                                                                        | Ran-binding protein 9 OS-Mus-musculus GN-Banbp9 Pe-1 Sv-1                                   |
| HNRNP40      | Q8Q0E1    | 19 | 19       | 126117.16 | 82616.63  | 111116.21 | 39655.58  | 86931.1   | 88988.53  | 10020     | 74441.32  | 85149       | 8857.26     | 0.49536939  | 0.305082233 | 89287.738 | 77467.623         | Down                                                                                               | 0.204868607400264                                                                                      | Heterogeneous nuclear ribonucleoprotein M OS-Mus-musculus GN-Hnnp40 Pe-1 Sv-3               |
| PCK2         | T21661    | 4  | 4        | 32085     | 36814.25  | 28457     | 30063.75  | 30467.5   | 33988.75  | 35964     | 24712     | 37488.75    | 10941.25    | 0.49566955  | 0.30407493  | 31575.73  | 27882.35          | Down                                                                                               | 0.17954479649321                                                                                       | Nucleoside diphosphate kinase 2 OS-Mus-musculus GN-Pck2 Pe-1 Sv-1                           |
| PCP1         | T21661    | 4  | 4        | 32153     | 36814.25  | 28457     | 30063.75  | 30467.5   | 33988.75  | 35964     | 24712     | 37488.75    | 10941.25    | 0.49566955  | 0.30407493  | 31575.73  | 27882.35          | Down                                                                                               | 0.17954479649321                                                                                       | Isomorph 1 of FHL-1 OS-Mus-musculus GN-Pcp1 Pe-1 Sv-1                                       |
| PDAP1        | Q31Q2H    | 6  | 6        | 14288.5   | 16104.17  | 12595.67  | 31159.5   | 16072     | 20569.83  | 17660.5   | 8317      | 22288.5     | 3972.33     | 0.49644378  | 0.304329919 | 18050.568 | 14557.633         | Down                                                                                               | 0.301268534995809                                                                                      | 28 kDa heat- and acid-stable phosphoprotein OS-Mus-musculus GN-Pdap1 Pe-1 Sv-1              |
| NMRAL1       | Q8K71     | 1  | 1        | 65334     | 66931     | 204620    | 36490     | 94001     | 98127     | 73795     | 255370    | 108789      | 36555.2     | 0.497277333 | 0.30403336  | 93655.2   | 63062             | Down                                                                                               | 0.41727016787368                                                                                       | NmrA-like family domain-containing protein 1 OS-Mus-musculus GN-NmrA1 Pe-1 Sv-1             |
| ERH          | P84089    | 4  | 4        | 6234.25   | 43108.25  | 16740.75  | 45066.75  | 50598.25  | 42835.75  | 43392.5   | 27089     | 32901.5     | NA          | 0.497173487 | 0.30302659  | 46389.65  | 3                 |                                                                                                    |                                                                                                        |                                                                                             |

|          |          |    |    |           |           |           |           |           |           |           |           |           |               |             |             |            |            |                    |                                                                                                 |                                                                                                    |
|----------|----------|----|----|-----------|-----------|-----------|-----------|-----------|-----------|-----------|-----------|-----------|---------------|-------------|-------------|------------|------------|--------------------|-------------------------------------------------------------------------------------------------|----------------------------------------------------------------------------------------------------|
| MAT2B    | Q99146   | 1  | 1  | 104066    | 104518    | 136943    | 61817     | 89761     | 73544     | 97846     | 406814    | 138968    | 136619        | 0.513800256 | 98947       | 107584.2   | Up         | 0.162685641278905  | Methionine adenosyltransferase 2 subunit beta OS-Mus musculus GN-Mat2B Pe-2 Sv-1                |                                                                                                    |
| PRPH     | P15313-3 | 1  | 1  | 49205     | 66688     | 38901     | 67926     | 50544     | 64480     | 59511     | 45960     | 72709     | NA            | 0.514372413 | 0.288720812 | 54572.8    | 59915      | Up                 | 0.134735166827768                                                                               | Inform 5b of Peripherin OS-Mus musculus GN-Prph                                                    |
| PRPF3    | Q99196   | 1  | 1  | 4         | 8733      | 9094      | NA        | NA        | 24453     | 92138     | 27201     | 22548     | NA            | 0.514408965 | 0.268917274 | 15702      | 18993.667  | Down               | 0.132783444302484                                                                               | Pra-mRNA processing factor 13 OS-Mus musculus GN-Prpf3 Pe-1 Sv-1                                   |
| SRF1     | Q8U008   | 4  | 4  | 14557.75  | 14719     | 4665.25   | 17862     | 18453.75  | 20952     | 16991.14  | 10953.25  | 15648.75  | NA            | 0.514505977 | 0.288487482 | 140515     | 16231.331  | Down               | 0.20805517323232                                                                                | NAD-dependent protein deacetylase subunit 2 OS-Mus musculus GN-Srf2 Pe-1 Sv-1                      |
| ANKFY1   | Q8U086   | 1  | 1  | 2         | 2879      | 2927      | NA        | 3716      | 1968      | 3361      | 3494      | 2708      | NA            | 0.288429153 | 0.28725     | 3172.667   | Up         | 0.14318906005086   | Ankyrin repeat and FYVE domain-containing protein 1 OS-Mus musculus GN-Ankfy1 Pe-2 Sv-2         |                                                                                                    |
| MPD2     | Q9W34    | 7  | 7  | 57695.57  | 66997.57  | 26864.71  | 67061.43  | 60389.29  | 65550.29  | 61144.43  | 16367.71  | 55764.71  | 0.514913644   | 0.2882856   | 55801.714   | 47855.514  | Down       | 0.22162427160593   | MAGUK p55 subfamily member 2 OS-Mus musculus GN-Mpd2 Pe-1 Sv-1                                  |                                                                                                    |
| GN-41C19 | Q9W34    | 1  | 1  | 33895.6   | 31027.1   | 25471     | 33927.1   | 32509     | 27820.4   | 31243     | 107244    | 29488.1   | 0.514913644   | 0.2882856   | 55801.714   | 47855.514  | Down       | 0.156617134354241  | Mitochondrial cytochrome b subunit 19 OS-Mus musculus GN-41C19                                  |                                                                                                    |
| FAM81A   | P12024   | 1  | 1  | 24220     | 29053     | 42408     | 24013     | 24013     | 24013     | 24013     | 24013     | 24013     | NA            | 0.515103033 | 0.287718025 | 2704.6     | 127.261    | Down               | 0.196213554579474                                                                               | Protein FAM81A OS-Mus musculus GN-Fam81a Pe-2 Sv-2                                                 |
| GRN      | P28778   | 1  | 1  | 9714      | 7252      | 24974     | 4608      | 5857      | 5219      | 8234      | 12673     | 24722     | 0.515103033   | 0.287608143 | 10481       | 13956.1    | Up         | 0.416187911891196  | Granulins OS-Mus musculus GN-Grn Pe-1 Sv-2                                                      |                                                                                                    |
| FBXO2    | Q8U0W2   | 2  | 2  | 66115.5   | 70745     | 89520     | 54591.5   | 64083     | 48115     | 71019.5   | 512678.5  | 63331     | 89000.5       | 0.515178263 | 0.287333478 | 69011      | 78628.9    | Up                 | 0.18823333139592                                                                                | F-box only protein 2 OS-Mus musculus GN-Fbxo2 Pe-1 Sv-1                                            |
| HCN2C7   | Q8U0W2   | 6  | 6  | 8912.31   | 11598.67  | 9717.69   | 26790.12  | 12146.5   | 71089.9   | 20024.89  | 18311     | 12454.5   | 8105.5        | 0.516142740 | 0.287446449 | 12663.98   | 19204.76   | Down               | 0.301803121564281                                                                               | Functional glutamate/glycine-1RNA ligase OS-Mus musculus GN-Hcn2c7                                 |
| GP43     | Q64433   | 28 | 28 | 158939.71 | 13501.25  | 146360.61 | 154616.71 | 130449.07 | 127847.07 | 52785.14  | 127807.11 | 140553.36 | 0.51621354    | 0.287521193 | 144210.9    | 13604.84   | Down       | 0.1940709235434396 | 10.5kDa heat shock protein, mitochondrial OS-Mus musculus GN-Gp43 Pe-1 Sv-2                     |                                                                                                    |
| EPISL1   | Q60002-3 | 7  | 7  | 17715.57  | 22029.14  | 23295     | 20872.43  | 20092.57  | 157947.57 | 188928    | 20512.14  | 20569.29  | 20752.29      | 0.516813719 | 0.287598398 | 20800.842  | 12014.718  | Down               | 0.049114807609011                                                                               | Isomorph 3 of Epidermal growth factor receptor substrate 15-like 1 OS-Mus musculus GN-Episl1       |
| UBB      | P00C49   | 7  | 7  | 76027.86  | 11117.14  | 58365.43  | 67378.57  | 103083.71 | 86209.14  | 136091.71 | 9737.29   | 14783.71  | 21999.43      | 0.516873618 | 0.285154814 | 85285.342  | 140031.166 | Up                 | 0.286403241061411                                                                               | Polysubiquitin B OS-Mus musculus GN-Ubb Pe-2 Sv-1                                                  |
| VP51     | Q3U3L4   | 2  | 2  | 8495      | 13290     | 3715.5    | 21905     | 14570.5   | 20021     | 16494     | NA        | 9576.5    | NA            | 0.51804591  | 0.24899524  | 12127.2    | 15363.831  | Up                 | 0.31208677441905                                                                                | Vacuolar protein sorting-associated protein 51 homolog OS-Mus musculus GN-Vp51 Pe-2 Sv-2           |
| NG2F     | Q8U0W2   | 3  | 3  | NA        | 9338      | NA        | 16384     | 4772.5    | 6793      | 3451      | NA        | NA        | 0.518331272   | 0.248555525 | 8238.1667   | 5123       | Down       | 0.701293188793184  | Ephrin 2 OS-Mus musculus GN-Ng2f Pe-1 Sv-1                                                      |                                                                                                    |
| BAC1     | P63001   | 7  | 7  | 36394.57  | 52266.86  | 53484.57  | 152707.43 | 43815     | 81994.86  | 77508.86  | 117233.14 | 51928.43  | 91843.57      | 0.51890097  | 0.284155385 | 67733.68   | 84121.777  | Up                 | 0.312605723403102                                                                               | Ras-related C1 botulinum toxin subunit 1 OS-Mus musculus GN-Bac1 Pe-1 Sv-1                         |
| MCEE     | Q9D155   | 1  | 1  | 50009     | 52340     | 77688     | 6806      | 35499     | 21848     | 44201     | 26979     | 50423     | 202984        | 0.518931373 | 0.284137513 | 44470.4    | 619169     | Down               | 0.637280217610384                                                                               | Methylmalonyl-CoA epimerase, mitochondrial OS-Mus musculus GN-Mcee Pe-1 Sv-1                       |
| AK3      | Q9W177   | 18 | 18 | 58501.61  | 59084.06  | 75691.28  | 36717.67  | 56439.61  | 51764.67  | 52394.61  | 71793.72  | 50620.17  | 12841.83      | 0.51894566  | 0.284125577 | 57286.846  | 63143      | Up                 | 0.1404189958026                                                                                 | GTP-AMP phosphatidyltransferase AK3, mitochondrial OS-Mus musculus GN-Ak3 Pe-1 Sv-1                |
| TRAF1    | P12024   | 1  | 1  | 1419      | 2009      | NA        | 5792      | 3437      | 6935      | 4724      | NA        | 2536      | NA            | 0.520073274 | 0.283722875 | 3214.25    | 651.6667   | Up                 | 0.337587097009834                                                                               | Probable phospholipid transporting ATPase 1A OS-Mus musculus GN-Traf1a Pe-1 Sv-1                   |
| TMEM87A  | Q8U0W9   | 1  | 1  | 3462      | 20445     | 7210      | 54258     | 15574     | 31131     | 33460     | NA        | 17209     | NA            | 0.52061442  | 0.283727806 | 20189.8    | 27266.667  | Up                 | 0.433511723031425                                                                               | Transmembrane protein 87A OS-Mus musculus GN-Tmem87a Pe-1 Sv-1                                     |
| QDPR     | Q8UW4    | 10 | 10 | 12748.3   | 116361.2  | 169223.9  | 68176.5   | 108184.8  | 100359.2  | 110242.3  | 168170.3  | 127224.6  | 0.520103992   | 0.28314662  | 116870.94   | 130099.512 | Up         | 0.1570262386419    | Dihydropteridine reductase OS-Mus musculus GN-Qdpr Pe-1 Sv-2                                    |                                                                                                    |
| CYCT     | Q00015   | 1  | 1  | 42391     | 36729     | 41923     | 28225     | 43850     | 29952     | 38398     | 40566     | 42174     | 50890         | 0.522472089 | 0.281743312 | 38623.6    | 41824      | Up                 | 0.114848406032766                                                                               | Cytochrome c, testis-specific OS-Mus musculus GN-Cyct Pe-1 Sv-3                                    |
| ICMB2    | A8U0H5   | 4  | 4  | 4375.5    | 7439      | 4882      | 7820      | 8915.5    | 10292.5   | 12823     | 3011.5    | 10233     | 7733.5        | 0.522519238 | 0.281897474 | 6687.2     | 8276.7     | Up                 | 0.307053400039806                                                                               | Potassium voltage gated channel subfamily B member 2 OS-Mus musculus GN-Icmb2 Pe-2 Sv-2            |
| CDCA2    | P06706   | 4  | 4  | 17427     | 24956.25  | 15309     | 58432     | 18964.5   | 30706     | 30157.5   | 12857     | 19083.75  | 11638.5       | 0.522521932 | 0.281895484 | 26977.75   | 20888.55   | Down               | 0.36905767827817                                                                                | Cell division control protein 42 homolog OS-Mus musculus GN-Cdc42 Pe-1 Sv-2                        |
| HPCAL1   | P62748   | 1  | 1  | 61294     | 69876     | 41292     | 86677     | 100967    | 97189     | 9748      | 60258     | 85155     | NA            | 0.522642445 | 0.28179523  | 71979.2    | 80637.5    | Up                 | 0.163870843961117                                                                               | Hippocalin-like protein 1 OS-Mus musculus GN-Hpcal1 Pe-2 Sv-2                                      |
| PRKCO    | Q02111   | 1  | 1  | 1854      | 4482      | 4619      | 9183      | 5691      | 9403      | 5501      | 9475      | 7034      | NA            | 0.523848905 | 0.28079416  | 5365.8     | 6740.75    | Up                 | 0.329115873727872                                                                               | Protein kinase C, theta type OS-Mus musculus GN-Prkco Pe-1 Sv-1                                    |
| ACADL    | Q8U071   | 16 | 16 | 16321.81  | 17291.89  | 14755.14  | 27815.94  | 36224.38  | 29185.94  | 16253.81  | 32027.12  | 23931.12  | 0.52403427    | 0.280513101 | 25315.18    | 28893.78   | Down       | 0.190514860788867  | Lipinophilin-3 OS-Mus musculus GN-Acadl Pe-1 Sv-2                                               |                                                                                                    |
| PCPD2    | Q8U0P9-3 | 15 | 15 | 93        | 62360.64  | 67257.07  | 62575.12  | 67515.12  | 68045.12  | 74149.12  | 67515.12  | 68045.12  | 0.52403427    | 0.280513101 | 25315.18    | 28893.78   | Down       | 0.3171858282799    | Protein 15 of Rab13 OS-Mus musculus GN-Pcpd2                                                    |                                                                                                    |
| BLOC1S1  | Q55102   | 1  | 1  | 7917      | 10951     | 17440     | 2193      | 7801      | 5063      | 5058      | 27705     | 7846      | 10600         | 0.524263138 | 0.280451629 | 9116.6     | 12514.4    | Up                 | 0.05525290081568                                                                                | Biogenesis of lysosome-related organelles complex 1 subunit 1 OS-Mus musculus GN-Bloc1s1 Pe-1 Sv-2 |
| GMBF     | Q8U0C3   | 16 | 16 | 103164.67 | 122994.4  | 127847.13 | 78234.33  | 94617.93  | 83147     | 100128    | 124076.27 | 112943.67 | 115579        | 0.524592463 | 0.280317953 | 100005.69  | 100714.91  | Up                 | 0.0998850628670071                                                                              | Glia maturation factor beta OS-Mus musculus GN-Gmbf Pe-1 Sv-1                                      |
| GOFC     | Q9W34    | 4  | 4  | 12600.75  | 16095.25  | 10622     | 19679.75  | 10542.75  | 16844     | 7446.5    | 11515.25  | NA        | 0.524966968   | 0.278967968 | 15109.65    | 134349.254 | Up         | 0.3341523434343434 | Coat-associated R2D2 associated coat motif-containing protein OS-Mus musculus GN-Gofc Pe-1 Sv-1 |                                                                                                    |
| FDPR     | P61578   | 1  | 1  | 21660     | 19849     | 7545      | 4997      | 19799     | 15729     | 14215     | NA        | 16889     | NA            | 0.52508916  | 0.275789916 | 19338.6    | 17001      | Down               | 0.185117536448304                                                                               | Nucleoside diphosphate kinase 1, mitochondrial OS-Mus musculus GN-Fdpr Pe-2 Sv-1                   |
| OLUO7A   | Q8U554   | 2  | 2  | 5362.5    | 6347.5    | 6358      | 8524      | 6973      | 8102.5    | 6932.5    | 5142.5    | 9700      | NA            | 0.525119115 | 0.279241213 | 7143       | 7464.873   | Up                 | 0.15316046090846                                                                                | OTU domain-containing protein 7A OS-Mus musculus GN-Oluo7a Pe-2 Sv-1                               |
| HNINP2A1 | Q8U559-2 | 34 | 34 | 115025.09 | 69241.03  | 78853.78  | 43073.47  | 81595.12  | 67920.66  | 66828.28  | 85219.12  | 69274.84  | 56096.44      | 0.525122233 | 0.279739519 | 77557.698  | 69067.868  | Down               | 0.167255292309547                                                                               | Isomorph 2 of heterogeneous nuclear ribonucleoproteins A2/B1 OS-Mus musculus GN-Hninp2a1           |
| GATB     | Q9U011   | 1  | 1  | 32427.67  | 3782      | 2426.67   | 12583     | 8964      | 13789.33  | 10150.67  | 7970.33   | 62549642  | 0.525400222   | 0.279430022 | 8033.808    | 9466.668   | Down       | 0.239235482743812  | Glutaryl-tRNA(Glu) amidotransferase subunit 8, mitochondrial OS-Mus musculus GN-Gatb Pe-1 Sv-1  |                                                                                                    |
| Q8U04F   | Q8U04F   | 22 | 22 | 2021353   | 270058    | 180714    | 180714    | 180714    | 412923    | 152533.61 | 254968    | 180714    | 0.525400222   | 0.279430022 | 8033.808    | 9466.668   | Down       | 0.3171858282799    | Protein 15 of Rab13 OS-Mus musculus GN-Q8U04F                                                   |                                                                                                    |
| BCAN     | Q61361   | 14 | 14 | 42303.92  | 39575.31  | 50073.38  | 26578.77  | 38034.77  | 36175     | 35652.08  | 48739.31  | 41106.85  | 51533.62      | 0.52546013  | 0.278634513 | 33949.23   | 42561.377  | Up                 | 0.115918453196291                                                                               | Brevian core protein OS-Mus musculus GN-Bcan Pe-1 Sv-2                                             |
| EPB41    | P48193   | 1  | 1  | 62355     | 82770     | 73667.5   | 311813    | 76441     | 145845.5  | 364715.5  | 69483     | NA        | 0.526479524   | 0.278618515 | 125483.3    | 87297.875  | Down       | 0.52347693385653   | Protein 4.1 OS-Mus musculus GN-Epb41 Pe-1 Sv-2                                                  |                                                                                                    |
| GLV1     | Q9U029   | 2  | 2  | 9896      | 8502      | 10920     | 6060      | 8440      | 7446.5    | 6221.5    | 11326.5   | 5239      | 6673          | 0.52649167  | 0.278608493 | 8273.5     | 7099.7     | Up                 | 0.22279720811249                                                                                | Nucleoside diphosphate kinase 1, mitochondrial OS-Mus musculus GN-Glv1 Pe-1 Sv-1                   |
| LSM5B1   | Q9W34    | 1  | 1  | 77840     | 74211.3   | 57273.67  | 31208.33  | 31208.33  | 67981.33  | 67981.33  | 67981.33  | 67981.33  | 0.52649167    | 0.278608493 | 8273.5      | 7099.7     | Up         | 0.18195478740313   | Protein RBD-1 OS-Mus musculus GN-Lsm5b1 Pe-1 Sv-1                                               |                                                                                                    |
| SPD19    | Q8U076   | 1  | 1  | 3799      | 6880      | NA        | 9411      | 5338      | 2523      | 7367      | NA        | 8997      | NA            | 0.526782973 | 0.278270973 | 6327       | 7372.3333  | Up                 | 0.220597607621331                                                                               | Signal recognition particle 19 kDa protein OS-Mus musculus GN-Spd19 Pe-2 Sv-1                      |
| USP8     | Q8U0U7   | 1  | 1  | 21272     | 23034     | 24244     | 31646     | 24173     | 31417     | 24251     | 19642     | 34779     | NA            | 0.52706426  | 0.278167595 | 24886.6    | 27527.25   | Up                 | 0.1452292749118                                                                                 | Ubiquitin carboxyl-terminal hydrolase 8 OS-Mus musculus GN-Usp8 Pe-1 Sv-2                          |
| SH3GL1   | Q64241   | 2  | 2  | 68276     | 76634     | 74592     | 102365    | 68237.5   | 98865.5   | 79306     | 69115     | 91636     | 80417         | 0.527212722 | 0.278104499 | 78407.8    | 83887.6    | Up                 | 0.0974601911651033                                                                              | Endophilin A3 OS-Mus musculus GN-Sh3gl1 Pe-2 Sv-1                                                  |
| CDK17    | Q8U075   | 1  | 1  | 40720     | 5047      | 73265     | 50648     | 50648     | 50648     | 50648     | 50648     | 50648     | 0.527212722   | 0.278104499 | 78407.8     | 83887.6    | Up         | 0.13017451381741   | Isomorph 2 of A kinase anchor protein 8 OS-Mus musculus GN-Cdk17 Pe-2 Sv-1                      |                                                                                                    |
| EPH8E    | Q8U084   | 3  | 3  | 322.33    | 890.33    | NA        | 4228.33   | 1608      | 3845.67   | 3495.67   | NA        | 662.67    | NA            | 0.528915525 | 0.276613907 | 1762.245   | 2668.0033  | Up                 | 0.59813491024341                                                                                | Ephrin type B receptor 6 OS-Mus musculus GN-Eph8e Pe-2 Sv-4                                        |
| SMC1A    | Q8U062   | 1  | 1  | 2236      | 1222      | NA        | 4027      | 3868      | 4167      | 2846      | NA        | NA        | NA            | 0.528956924 | 0.276580121 | 2838.25    | 3506.5     | Up                 | 0.30503006908725                                                                                | Structural maintenance of chromosomes protein 1A OS-Mus musculus GN-Smc1a Pe-1 Sv-4                |
| TPM2     | P58774   | 14 | 14 | 26907.25  | 27827.58  | 16592.92  | 27402.75  | 26851.67  | 35369.17  | 33052.25  | 22726.42  | 12457.58  | 0.529249957   | 0.27633916  | 25116.434   | 29020.918  | Up         | 0.20846150924411   | Tropomyosin beta chain OS-Mus musculus GN-Tpm2 Pe-1 Sv-1                                        |                                                                                                    |
| TPM2     | Q8U071   | 13 | 13 | 114536.36 | 115386.31 | 81792.38  | 115386.31 | 81792.38  | 115386.31 | 81792.38  | 115386.31 | 81792.38  | 0.529249957</ |             |             |            |            |                    |                                                                                                 |                                                                                                    |

|          |          |    |          |           |           |           |           |           |           |           |             |             |              |             |             |                   |                                                                               |                   |                                                                                    |                                                                                                              |
|----------|----------|----|----------|-----------|-----------|-----------|-----------|-----------|-----------|-----------|-------------|-------------|--------------|-------------|-------------|-------------------|-------------------------------------------------------------------------------|-------------------|------------------------------------------------------------------------------------|--------------------------------------------------------------------------------------------------------------|
| PLXNA3   | P70202   | 2  | 2        | 12483     | 17943.5   | 9604      | 19630.5   | 15359     | 20442.5   | 23665.5   | 12717.5     | 13234.5     | NA           | 0.546276983 | 0.26287106  | 15364             | 17510                                                                         | Up                | 0.188625214789855                                                                  | Plxin-A3 OS-Musculus mGlu-PlxnA3 PE-1 SV-2                                                                   |
| STN3     | O9E026   | 6  | 6        | 14588.17  | 13911     | 8431.17   | 20794.33  | 14151.83  | 18364.33  | 12649.33  | 4336        | 12087.5     | NA           | 0.546485898 | 0.26242104  | 13949.3           | 17510                                                                         | Down              | 0.2528471836308                                                                    | Striatin-3 OS-Musculus mGlu-Striatin3 PE-1 SV-1                                                              |
| COX2C    | P17465   | 1  | 1        | 5443.33   | 61257     | 960275    | 33989     | 48932     | 493670    | 31470     | 82939       | 384342      | 166822       | 0.547156628 | 0.26155928  | 52433.2           | 70272.7                                                                       | Up                | 0.36260524329647                                                                   | Cytochrome c oxidase subunit 2C, mitochondrial OS-Musculus mGlu-Co2C7c PE-1 SV-1                             |
| PSMD12   | O260565  | 1  | 1        | 76175.5   | 13961     | 36018.5   | 13560     | 17162     | 17712.5   | 13961     | 1515        | 69235       | 0.5473430035 | 0.26126664  | 20833.4     | 27952.2           | Up                                                                            | 0.4345240486018   | SIS, proteasome non-ATPase regulatory subunit 12 OS-Musculus mGlu-PsmD12 PE-1 SV-1 |                                                                                                              |
| RP27A    | PE2693   | 8  | 8        | 1422.88   | 91507.75  | 58899.25  | 67975.25  | 86911.5   | 17661.12  | 10988.62  | 64799.12    | 146625.75   | 41948.75     | 0.547587697 | 0.26146318  | 75883.326         | 88312.67                                                                      | Up                | 0.21883755116897                                                                   | Ubiquitin-40 ribosomal protein 527A OS-Musculus mGlu-Rp27A PE-1 SV-2                                         |
| GRCC10   | O33127   | 5  | 5        | 34579.6   | 35917.2   | 347370.2  | 37797.349 | 38205.8   | 35190.8   | 44943.4   | 43657.8     | 29666.6     | 0.547780242  | 0.261375719 | 36420.56    | 38332.88          | Up                                                                            | 0.078289285339643 | Protein C10 OS-Musculus mGlu-Grcc10 PE-2 SV-1                                      |                                                                                                              |
| AP4H1    | 6        | 6  | 30942.33 | 42277.67  | 47884.67  | 47790     | 57433.33  | 65178.67  | 51433.33  | 57433.33  | 51433.33    | 57433.33    | 0.548024964  | 0.261375719 | 48011.66    | 54137.33          | Up                                                                            | 0.17981335166104  | Protein C10 OS-Musculus mGlu-Grcc10 PE-2 SV-1                                      |                                                                                                              |
| ALDH4    | P47378   | 5  | 5        | 20354.6   | 24712.8   | 10057.6   | 50294.2   | 25313.8   | 27884.6   | 25313.8   | 21441.4     | NA          | 0.549088308  | 0.260375719 | 20932.36    | 24712.73          | Down                                                                          | 0.364241728413723 | Aldehyde dehydrogenase, mitochondrial OS-Musculus mGlu-Alh4 PE-1 SV-1              |                                                                                                              |
| CACNA2D1 | O08332-5 | 27 | 27       | 24886.77  | 53324.92  | 19456.73  | 72819.09  | 31551.04  | 52223.73  | 54232.46  | 44186.73    | 35871.15    | 30703        | 0.549289521 | 0.260198865 | 36799.81          | 43443.41                                                                      | Up                | 0.239438380121099                                                                  | isoform 2L of Voltage-dependent calcium channel subunit alpha-2/delta-1 OS-Musculus mGlu-Cacna2d1            |
| PTDSS2   | O28132   | 2  | 2        | NA          | NA          | NA           | 0.549393176 | 0.259939176 | 2845              | 32003.1333                                                                    | Up                | 0.1751227746012                                                                    | Phosphatidylesterase 2 OS-Musculus mGlu-Ptdss2 PE-2 SV-2                                                     |
| SH3BPX2  | A2A475   | 1  | 1        | 1         | 1319      | NA        | 2666      | 1751      | 7380      | 20061     | NA          | NA          | NA           | 0.549497131 | 0.2598779   | 1319              | 1319                                                                          | Down              | 0.20715470470861                                                                   | SH3 and Pxx domain-containing protein 2B OS-Musculus mGlu-Sh3bpX2 PE-1 SV-1                                  |
| RMS1     | O0995-2  | 4  | 4        | 67819.25  | 71024.75  | 54266     | 89053.75  | 91522.75  | 80719.75  | 90463.25  | 57314       | 101949.25   | NA           | 0.55009845  | 0.259959579 | 7598.13           | 63121.688                                                                     | Up                | 0.13785384147707                                                                   | isoform 2 of Regulating synaptic membrane exocytosis protein 1 OS-Musculus mGlu-Rms1                         |
| O99B2    | 3        | 3  | 43409.67 | 62593.3   | 55568.67  | 37766.33  | 55631.67  | 30180.33  | 58739.33  | 59380     | 0.550083142 | 0.259316455 | 50599.34     | 55943.73    | Down        | 0.144858103083857 | Hydroxypyruvate reductase SDR family class 4 OS-Musculus mGlu-O99B2 PE-1 SV-1 |                   |                                                                                    |                                                                                                              |
| PTGES2   | O8BWM40  | 1  | 1        | 3008      | 8663      | NA        | 4897      | 3888      | 7338      | 2276      | NA          | 12060       | NA           | 0.550092118 | 0.258904273 | 5139              | 7224.6667                                                                     | Up                | 0.491443373609545                                                                  | Prostaglandin E synthase 2 OS-Musculus mGlu-Ptges2 PE-1 SV-3                                                 |
| PABPN1   | O8C56    | 1  | 1        | 34523     | 31455     | 18650     | 23554     | 2841      | 36619     | 17330     | 11383       | NA          | 0.55150935   | 0.258447121 | 27230.5     | 21777.333         | Down                                                                          | 0.32716186292249  | polyadenylation-binding protein 2 OS-Musculus mGlu-Pabpn1 PE-2 SV-3                |                                                                                                              |
| RLP22    | PE2301   | 15 | 15       | 30509.92  | 32320     | 42787.08  | 25802.63  | 33923.23  | 29805.38  | 36203.84  | 33619.62    | 34594.66    | 36881        | 0.552418027 | 0.257373161 | 34027.52          | 36212.3                                                                       | Up                | 0.094025420885153                                                                  | 60S ribosomal protein L23 OS-Musculus mGlu-Rlp22 PE-1 SV-2                                                   |
| HSPAL1   | P16627   | 23 | 23       | 59620.48  | 59957.65  | 66313.43  | 82872.48  | 54991.3   | 64788.09  | 60723.13  | 61395.35    | 58111.91    | 62792.2      | 0.552539564 | 0.257558027 | 64752.668         | 61543.48                                                                      | Down              | 0.307358087797757                                                                  | Heat shock 70 kDa protein 1-like OS-Musculus mGlu-Hspal1 PE-2 SV-4                                           |
| FAM175B  | O37C10   | 1  | 1        | 17523     | 22921     | 21804     | 25834     | 21085     | 21922     | 20061     | NA          | 24383       | NA           | 0.552688939 | 0.25711369  | 23833.4           | 22122                                                                         | Down              | 0.107502954409306                                                                  | BRIS1 complex subunit Abro1 OS-Musculus mGlu-Fam175b PE-2 SV-1                                               |
| NKIRAS2  | O8C56    | 1  | 1        | 33801     | 33446     | 38758     | 17049     | 31255     | 24693     | 27362     | 46964       | 33170       | 38947        | 0.553530315 | 0.256780215 | 38082.8           | 34227.7                                                                       | Up                | 0.14932106678233                                                                   | NF-kappa-B inhibitor-interacting Ras-like protein 2 OS-Musculus mGlu-Nkiras2 PE-2 SV-1                       |
| TACC1    | O03465-2 | 6  | 6        | 14414.33  | 17653.5   | 6966.5    | 1548.17   | 17792.83  | 17120     | 17228.5   | 10561       | 15683.67    | 3856.17      | 0.553693939 | 0.256773013 | 15221.066         | 13069.88                                                                      | Up                | 0.212848302171025                                                                  | isoform 2 of Transforming acidic coiled-coil-containing protein 1 OS-Musculus mGlu-Tacc1                     |
| TACC2    | O5P783   | 3  | 3        | 14113.67  | 18959     | 15691.33  | 27068.67  | 14274.67  | 21805     | 17363.33  | 25768.33    | 19307       | NA           | 0.553705478 | 0.256771164 | 18021.468         | 20186.415                                                                     | Up                | 0.163686818275508                                                                  | 527P-binding protein D-Rac2 OS-Musculus mGlu-Tacc2 PE-2 SV-1                                                 |
| PNKP     | O8IUV6   | 1  | 1        | 5065      | 3592      | NA        | 3486      | 3636      | 4662      | 5276      | 5826        | 2250        | NA           | 0.554500916 | 0.256097854 | 5139              | 4593.5                                                                        | Up                | 0.191112789640155                                                                  | Bifunctional polynucleotide phosphatase/kinase OS-Musculus mGlu-Pnkp PE-1 SV-2                               |
| NEBL     | O8D007   | 12 | 12       | 51257     | 37222.9   | 33527.6   | 69932.5   | 57216.8   | 52777.8   | 53632.5   | 37397.3     | 57513.3     | 16904.5      | 0.555092921 | 0.255660678 | 49831.36          | 43645.18                                                                      | Down              | 0.19123161165152483                                                                | LM zinc-binding domain containing Nebulette OS-Musculus mGlu-Nebl PE-1 SV-3                                  |
| PACT1    | O8C212   | 6  | 6        | 46121.83  | 49955.17  | 40419.33  | 92070.83  | 62024     | 77666.33  | 70290.17  | 25662.17    | 48178.83    | 23484        | 0.555123074 | 0.255603127 | 58000.432         | 49057.6                                                                       | Up                | 0.241611425126551                                                                  | Phosphorin acidic cluster protein 1 OS-Musculus mGlu-Pact1 PE-2 SV-2                                         |
| ARMDC    | O8BNU0-2 | 1  | 1        | 26816     | 21351     | 12757     | 56586     | 34629     | 47739     | 11287     | NA          | 21242       | NA           | 0.555427731 | 0.255172441 | 30427.8           | 37422.667                                                                     | Up                | 0.29852338442993                                                                   | isoform 2 of Armadillo repeat-containing protein 6 OS-Musculus mGlu-Armdc                                    |
| CYTH1    | O8QXK1   | 1  | 1        | 74461     | 136958    | 77373     | 24913     | 88407     | 94152     | 102728    | 95556       | 155927.03   | 76904.4      | 0.555907176 | 0.256097854 | 93089.75          | 11884.83                                                                      | Up                | 0.224143971251082                                                                  | Cytohesin-1 OS-Musculus mGlu-Cyth1 PE-1 SV-2                                                                 |
| MINK1    | O8IUS2   | 1  | 1        | 17832.2   | 48110     | 45985.18  | 38881.36  | 51287.91  | 51582.73  | 59965.55  | 14941.18    | 54948.36    | 6635.27      | 0.555630607 | 0.25518789  | 44676.14          | 7434.618                                                                      | Down              | 0.255138097462556                                                                  | Mushroom-like kinase 1 OS-Musculus mGlu-Mink1 PE-1 SV-3                                                      |
| RP1      | P71659   | 20 | 20       | 36387.56  | 181932.12 | 176341.25 | 17631.25  | 174185.85 | 16800.1   | 149801.5  | 167913.45   | 155106.8    | 148414.1     | 0.555725708 | 0.255115073 | 16991.104         | 18293.13                                                                      | Up                | 0.44343123279878                                                                   | 60S ribosomal protein L3 OS-Musculus mGlu-Rp1 PE-1 SV-3                                                      |
| RMS2     | P52480   | 1  | 1        | 58651.67  | 92011.35  | 48487.65  | 49579     | 74347.5   | 71388.5   | 43916.5   | NA          | 52465.1     | NA           | 0.555781428 | 0.2546511   | 63403.5           | 63403.5                                                                       | Up                | 0.1554784284740308                                                                 | 60S ribosomal acidic membrane exocyst protein 2 OS-Musculus mGlu-Rms2 PE-1 SV-1                              |
| PKM      | P52480   | 79 | 79       | 133625.19 | 138601.78 | 118379.19 | 162049.08 | 152749.19 | 162769.21 | 165338.44 | 141673.03   | 131762.37   | 144353.53    | 0.556238041 | 0.254742623 | 143826.15         | 149179.702                                                                    | Up                | 0.360373808055244                                                                  | Pyruvate kinase PKM OS-Musculus mGlu-Pkm PE-1 SV-1                                                           |
| SPCKC1   | O5XV10   | 1  | 1        | 27986.22  | 26722.67  | 27656.33  | 27597.67  | 30523.89  | 32787.67  | 28661.67  | 18083.78    | 34163.33    | 0.556322443  | 0.254671869 | 30180.424   | 30180.424         | Up                                                                            | 0.103168427741661 | Cytosin-B OS-Musculus mGlu-Spckc1 PE-1 SV-2                                        |                                                                                                              |
| CHDH96   | GLV104   | 1  | 1        | 91827.27  | 94145.5   | 62495.82  | 62495.82  | 62495.82  | 62495.82  | 62495.82  | 62495.82    | 62495.82    | 62495.82     | 0.556322443 | 0.254671869 | 30180.424         | 30180.424                                                                     | Up                | 0.103168427741661                                                                  | CHDH96 OS-Musculus mGlu-Chdh96 PE-1 SV-1                                                                     |
| SDHAF2   | O8I667   | 3  | 3        | 29008     | 6597.67   | 17422.08  | 9467.5    | 7366.17   | 10012.67  | 12103.33  | 1879        | 5787.33     | 4509         | 0.556322443 | 0.254671869 | 30180.424         | 30180.424                                                                     | Up                | 0.103168427741661                                                                  | SDHAF2 OS-Musculus mGlu-Sdhaf2 PE-1 SV-1                                                                     |
| NUA17    | O09111   | 3  | 3        | 41823.33  | 90600.33  | 32054.67  | 189389.67 | 102052.33 | 143954    | 143402    | 77954       | 8222.33     | NA           | 0.556750748 | 0.255178823 | 91185.26          | 11884.83                                                                      | Up                | 0.295141893608951                                                                  | NADH dehydrogenase (ubiquinone) 1 beta subcomplex subunit 11, mitochondrial OS-Musculus mGlu-Nua17 PE-1 SV-2 |
| TUBA3A   | P05214   | 66 | 66       | 214203.24 | 25995.03  | 295953.61 | 298720.45 | 227547.71 | 275769.12 | 278849.03 | 249207.7    | 263880.94   | 240672.82    | 0.558053325 | 0.253322245 | 251244.01         | 261565.12                                                                     | Up                | 0.0580699590128852                                                                 | Tubulin alpha 3 chain OS-Musculus mGlu-Tuba3a PE-1 SV-1                                                      |
| TRIO     | O0Q002-2 | 6  | 6        | 34.96     | 1919.8    | 509.6     | 6878.8    | 5456.8    | 5068      | 7294      | 2594        | 2984.4      | 0.558200995  | 0.253260204 | 2484        | 3445              | Up                                                                            | 0.42988958464739  | Tubulin 2 of Triple functional domain protein OS-Musculus mGlu-Trio                |                                                                                                              |
| TRAF1    | P4428    | 1  | 1        | 3428      | 44670     | NA        | 41897     | 57693     | 46493     | 52991     | NA          | 52991       | NA           | 0.558200995 | 0.253260204 | 2484              | 3445                                                                          | Up                | 0.42988958464739                                                                   | TRAF1 OS-Musculus mGlu-Traf1 PE-1 SV-1                                                                       |
| RLP1A    | P19253   | 1  | 1        | 37698.33  | 91794     | 90784     | 95127.33  | 75799.33  | 83084     | 86140     | 81271.33    | 101706      | 48548.67     | 0.558983438 | 0.252601059 | 86094.598         | 80150                                                                         | Down              | 0.103202198274756                                                                  | 60S ribosomal protein L13a OS-Musculus mGlu-Rlp1a PE-1 SV-4                                                  |
| TPD52L1  | O54818   | 1  | 1        | 5791      | 22536     | NA        | 10267     | 13812     | 13078     | 9515      | NA          | NA          | NA           | 0.559385361 | 0.252585561 | 13101.5           | 16116.5                                                                       | Up                | 0.29880674322252                                                                   | Tumor protein D53 OS-Musculus mGlu-Tpd52l1 PE-2 SV-1                                                         |
| AQR4     | P50888-3 | 2  | 2        | 6165      | 74838     | 11645     | 33032.5   | 6511.5    | 24000.5   | 12733.5   | NA          | 7706        | NA           | 0.559385361 | 0.252585561 | 13101.5           | 16116.5                                                                       | Up                | 0.29880674322252                                                                   | AQR4 OS-Musculus mGlu-Aqr4                                                                                   |
| PCAT2    | O54818   | 12 | 12       | 47        | 10521.33  | 13532.63  | 75103.35  | 72535.23  | 15660.53  | 24960.53  | 31627.59    | 21901.27    | NA           | 0.559385361 | 0.252585561 | 13101.5           | 16116.5                                                                       | Up                | 0.29880674322252                                                                   | PCAT2 OS-Musculus mGlu-Pcat2 PE-1 SV-1                                                                       |
| UBIN6    | O09916   | 6  | 6        | 49064.86  | 49771.29  | 30238.43  | 46393.14  | 58502.71  | 53247.71  | 57978.86  | 1561        | 59123.43    | 18702        | 0.559385361 | 0.252585561 | 13101.5           | 16116.5                                                                       | Up                | 0.29880674322252                                                                   | UBIN6 OS-Musculus mGlu-Ubin6 PE-1 SV-1                                                                       |
| CTT7     | P80313   | 16 | 16       | 46782.13  | 61103.19  | 56647.8   | 54128.73  | 55388.93  | 51908.47  | 55124.27  | 49774.27    | 52431.8     | 51126.73     | 0.560033024 | 0.251785665 | 53266.304         | 52071.508                                                                     | Down              | 0.0316271580751121                                                                 | T-complex protein 1 subunit eta OS-Musculus mGlu-Ctt7 PE-1 SV-1                                              |
| STC2     | O9PH08   | 2  | 2        | 61794     | 61602     | 106590    | 61384     | 60924.5   | 74211     | 62699     | 96524       | 62994       | 74866        | 0.560125608 | 0.251714574 | 73809.9           | 78208.8                                                                       | Up                | 0.12172247518153                                                                   | Serine/threonine protein kinase 24 OS-Musculus mGlu-Stc2 PE-1 SV-1                                           |
| CTC1     | P29027   | 27 | 27       | 29627     | 27767     | 13967     | 309       | 35260     | 7625      | 4141      | 38781       | NA          | NA           | 0.560125608 | 0.251714574 | 73809.9           | 78208.8                                                                       | Up                | 0.12172247518153                                                                   | CTC1 OS-Musculus mGlu-Ctc1 PE-1 SV-1                                                                         |
| ETFA     | O9C9C5   | 28 | 28       | 80500.61  | 84553.82  | 71880.61  | 63527.39  | 85450.39  | 72101.64  | 84084.39  | 73775       | 78200.36    | 60348.04     | 0.560584613 | 0.251358827 | 7182.564          | 7370.486                                                                      | Down              | 0.0606812638044556                                                                 | Electron transfer flavoprotein subunit alpha, mitochondrial OS-Musculus mGlu-Etfa PE-1 SV-2                  |
| OLAI     | O8C730   | 3  | 3        | 42570.33  | 65415.33  | 67893.33  | 50011.67  | 62756     | 65343     | 60322     | 58310       | NA          | NA           | 0.560742162 | 0.251232828 | 60322.56          | 61260.25                                                                      | Up                | 0.12683117765423                                                                   | Obg-like ATPase 1 OS-Musculus mGlu-Olai PE-1 SV-1                                                            |
| PUM1     | O8U078-4 | 5  | 5        | 14477.2   | 17835.8   | 6400.2    | 14700.4   | 16845.2   | 18024.4   | 22321.8   | 1200        | 18613.8     | 24475        | 0.          |             |                   |                                                                               |                   |                                                                                    |                                                                                                              |

|          |           |    |    |           |           |           |           |           |           |           |           |           |            |             |             |           |      |                     |                                                                                                               |
|----------|-----------|----|----|-----------|-----------|-----------|-----------|-----------|-----------|-----------|-----------|-----------|------------|-------------|-------------|-----------|------|---------------------|---------------------------------------------------------------------------------------------------------------|
| MFF      | Q6P7P5-3  | 9  | 4  | 14765.25  | 18180.5   | 6940      | 42499.12  | 26972.25  | 36109     | 27144     | 1771.88   | 16535.12  | 4103       | 0.57693236  | 0.238874737 | 22621.24  | Down | 0.410692180975248   | Isomorph 3 of Mitochondrial fusion factor OS-Mus musculus GN-Hmff                                             |
| HP156    | P17156    | 44 | 44 | 66666.14  | 66359.45  | 90189.8   | 66665.55  | 72857.98  | 77140     | 6666.66   | 77835.11  | 63246.59  | 55170.93   | 0.576938842 | 0.238870222 | 7162.72   | Down | 0.40739228789652578 | Heart shock-related 70 kDa protein 2 OS-Mus musculus GN-Hsmpa2 Pe1 SV-2                                       |
| SNRPD3   | Q61230    | 2  | 2  | 15875.5   | 16049.5   | 10129.5   | 12676     | 13837     | 14262     | 15333.5   | 2881.5    | 10025     | NA         | 0.577105028 | 0.238745134 | 1253.35   | Down | 0.231482359593922   | Small nuclear ribonucleoprotein Sn D3 OS-Mus musculus GN-Snrdp3 Pe1 SV-1                                      |
| ORF505   | Q61230    | 4  | 4  | 8525.25   | 8963      | 2445.25   | 21174.25  | 9466.25   | 14477.25  | 6276.25   | 3341      | 3681.25   | NA         | 0.577322461 | 0.238729451 | 97349     | Down | 0.387281023246545   | Protein SET OS-Mus musculus GN-Set Pe1 SV-1                                                                   |
| UMCH1    | Q3UH69-3  | 2  | 2  | 4212      | 5262      | 2559      | 5446      | 5322      | 5297      | 7673      | 5332      | 3061      | NA         | 0.577798604 | 0.228232132 | 4422      | Down | 0.191026859549346   | Isomorph 3 of LIM and calponin homology domains-containing protein 1 OS-Mus musculus GN-Limch1                |
| NDUFA12  | Q7MTM3    | 8  | 8  | 115513.88 | 119111    | 112357.75 | 84183.62  | 111120.62 | 100105.88 | 101092.75 | 122642.88 | 123126.75 | 134523     | 0.577839376 | 0.238192559 | 110697.37 | Down | 0.0714267815765449  | NADH dehydrogenase (ubiquinone) L1 alpha subcomplex subunit 12 OS-Mus musculus GN-Ndufa12 Pe1 SV-2            |
| FNHAB    | Q6C2V8    | 25 | 25 | 19865.54  | 19874.67  | 18174.66  | 16183.62  | 29607.62  | 141422.67 | 166428.38 | 257407.42 | 75449.67  | 314508.67  | 0.578086127 | 0.237450861 | 314508.67 | Down | 0.214440214611121   | L1-3 3 protein beta-actin OS-Mus musculus GN-Fnhab Pe1 SV-3                                                   |
| ARHGA94  | Q5Y8M1    | 3  | 3  | 125436.33 | 114995.67 | 132863.33 | 131243    | 112120.33 | 140945.67 | 169053.67 | 495613.67 | 151238    | 88403.33   | 0.578453721 | 0.237453172 | 133737.53 | Down | 0.1513810329749078  | Protein GTPase-activating protein 44 OS-Mus musculus GN-Arnga94 Pe1 SV-1                                      |
| BP12     | P35729    | 10 | 10 | 114766.2  | 115383.4  | 1137905.2 | 162215.9  | 106796    | 130083.6  | 149203.1  | 111770.2  | 150534.9  | 58432.4    | 0.579046525 | 0.237286541 | 131413.4  | Down | 0.111325792487006   | 60S ribosomal protein L12 OS-Mus musculus GN-Bp12 Pe1 SV-2                                                    |
| USP37C   | Q88105    | 7  | 7  | 8266.17   | 10140     | 7126.33   | 9709.67   | 10556.33  | 15841.67  | 7889.5    | 8872.17   | NA        | NA         | 0.579149403 | 0.237059416 | 9159.7    | Down | 0.178614734049219   | Vacuolar protein sorting-associated protein 37C OS-Mus musculus GN-Vus37c Pe1 SV-2                            |
| PRKCD    | P28867    | 2  | 2  | 1165.5    | 7164.5    | 8628      | 29122.5   | 17995.5   | 74818     | 19512     | 20658     | 4440      | NA         | 0.579664598 | 0.236812723 | 13215.2   | Down | 0.351149547147471   | Protein kinase C-delta type OS-Mus musculus GN-Prkcd Pe1 SV-1                                                 |
| CLP1     | Q22212    | 23 | 23 | 45960.86  | 13887.57  | 60324.24  | 36751.95  | 5382.15   | 48510.29  | 5431.24   | 4473.19   | 67852.57  | 55189.62   | 0.579803105 | 0.236609105 | 50078.48  | Down | 0.080743597572032   | Cap-Gly domain-containing linker protein 1 OS-Mus musculus GN-Clp1 Pe1 SV-1                                   |
| TMD02    | Q9WIK7-2  | 3  | 3  | 335642.67 | 40229.67  | 2624      | 53447     | 30058     | 40044.33  | 40880.67  | 31502.67  | 26838.67  | 33657.67   | 0.580024814 | 0.236550731 | 53404.68  | Down | 0.111420259466073   | Isomorph 2 of Tropomodulin 2 OS-Mus musculus GN-Tmd02                                                         |
| CD26DIP  | Q9WU78    | 8  | 8  | 8374.75   | 11260.88  | 7931.25   | 18120.38  | 16718.25  | 13896.12  | 5679.62   | 10553     | 6652.75   | 0.58000555 | 0.236512927 | 12659.552   | 10699.948 | Down | 0.242625567566274   | Pro-gammasubunit cell death 6-interacting protein OS-Mus musculus GN-Pd6ip Pe1 SV-3                           |
| MATR3    | Q88130    | 28 | 28 | 95637.25  | 51854.54  | 58066.46  | 38560.11  | 79521.57  | 48251.43  | 55625.57  | 51584.54  | 53063.14  | 33225.36   | 0.580174409 | 0.236414332 | 52655.986 | Down | 0.161246728082264   | Matrin-3 OS-Mus musculus GN-Matr3 Pe1 SV-1                                                                    |
| ADP1     | Q92192    | 7  | 7  | 17005.1   | 21507.47  | 15382     | 21451.33  | 20971     | 19778     | 24019.67  | 8055.5    | 16603.83  | NA         | 0.580320205 | 0.236142087 | 19402.8   | Down | 0.150142434137161   | ATP-citrate synthase OS-Mus musculus GN-Adp1 Pe1 SV-1                                                         |
| COX6C    | Q9C9C1    | 7  | 7  | 254670.29 | 246805.71 | 430663.62 | 183178.48 | 233182.29 | 234827.43 | 242710.71 | 405745.74 | 260543.43 | 375193.71  | 0.580405145 | 0.236089208 | 269504    | Down | 0.16330054546321    | Cytochrome c oxidase subunit 6C OS-Mus musculus GN-Cox6c Pe1 SV-3                                             |
| EPB41L1  | Q8Z2H5    | 28 | 28 | 63755.07  | 71283     | 45736.36  | 20024     | 19933     | 20025.46  | 92024.89  | 41967.25  | 91515.25  | 52962.43   | 0.580545431 | 0.236545431 | 65209.422 | Down | 0.14253683541022    | Band 4.1-like protein 3 OS-Mus musculus GN-Epb41l1 Pe1 SV-2                                                   |
| SHB1     | Q912M2-3  | 2  | 2  | 15551     | 18761     | NA        | 328115    | 21378     | 26649     | 26909     | 13605.5   | 6224      | NA         | 0.581262824 | 0.235612659 | 22075.375 | Down | 0.26582772424233    | Isomorph 3 of SH2 adapter protein 1 OS-Mus musculus GN-Shb1                                                   |
| SPAG7    | Q7T1K3    | 1  | 1  | 20893     | 27936     | 20634     | 20459     | 25556     | 24129     | 23000     | 30052     | 27575     | NA         | 0.581700176 | 0.235299473 | 23171.5   | Down | 0.0930487087382422  | Sperm-associated antigen 7 OS-Mus musculus GN-Spag7 Pe1 SV-1                                                  |
| MRLP38   | Q8KCM0    | 1  | 1  | 16334     | 6324      | 16178     | 22046     | 18984     | 19069     | 19613     | NA        | 10512     | NA         | 0.581728752 | 0.235279471 | 15955.2   | Down | 0.306461557561646   | 39S ribosomal protein L38, mitochondrial OS-Mus musculus GN-Mrlp38 Pe1 SV-2                                   |
| NDUUB10  | Q9DC9C    | 29 | 29 | 103203.54 | 107504.96 | 88216.07  | 81444.24  | 93598.96  | 96951.64  | 88199.32  | 70063.14  | 100872.14 | 80480.32   | 0.581738234 | 0.235273222 | 94793.548 | Down | 0.0528107121924661  | NADH dehydrogenase (ubiquinone) L1 beta subcomplex subunit 10 OS-Mus musculus GN-Nduub10 Pe1 SV-3             |
| ITSD1    | Q9D085    | 1  | 1  | 200413    | 180508    | 79039     | 155356    | 201217    | 126139    | 822600    | 132903    | 120245    | 158186937  | 0.581869537 | 0.235175125 | 163466.6  | Down | 0.2514672412447138  | Thiosulfate sulfurtransferase/hydrosulfide-like domain-containing protein 3 OS-Mus musculus GN-Itsd1 Pe1 SV-1 |
| KALRN    | A2C249-8  | 2  | 2  | 28168     | 43785.5   | 56781     | 33112.5   | 40443     | 31310     | 60225     | 55790.5   | 34325     | 40395.5    | 0.581922744 | 0.235114668 | 40579.8   | Down | 0.150480481780204   | Isomorph 8 of Kalirin OS-Mus musculus GN-Kalrn                                                                |
| HNRNPL   | Q80181    | 14 | 14 | 144202.64 | 69205.64  | 84442.14  | 60806.07  | 101397.29 | 71260.86  | 69941.43  | 93793.43  | 71556.07  | 91068.86   | 0.582037457 | 0.235049066 | 86049.756 | Down | 0.11377847752087    | Heterogeneous nuclear ribonucleoprotein 1 OS-Mus musculus GN-Hnrnpl Pe1 SV-2                                  |
| HARS     | Q6B035    | 2  | 2  | 4552.5    | 10554     | 4224.5    | 10117     | 11617.5   | 14908.5   | 18167     | 11807     | 18067     | 14501      | 0.582491953 | 0.234710361 | 11806.7   | Down | 0.296745573524033   | Histidine-tRNA ligase OS-Mus musculus GN-Hars Pe1 SV-2                                                        |
| TAMM41   | Q3TJH1    | 1  | 1  | NA        | NA        | NA        | 5343      | 1823      | 2532      | 1877      | NA        | 7499      | NA         | 0.583026702 | 0.233812485 | 3581      | Down | 0.6802478536746     | Mitochondrial translocase assembly and maintenance protein 44 homolog OS-Mus musculus GN-Tamm41 Pe1 SV-2      |
| ACAA1A   | Q2L1H8    | 24 | 24 | 36791.5   | 82718.62  | 99393.92  | 47195.88  | 72312.36  | 70558.88  | 102766.5  | 97408.12  | 81584.12  | 97888.434  | 0.583385115 | 0.23137072  | 79888.434 | Down | 0.107367590299297   | 1-Isomorph-GokA, peroxisomal OS-Mus musculus GN-Acaa1a Pe1 SV-1                                               |
| NRG1     | Q80124    | 31 | 31 | 41159.33  | 103860.03 | 94313.66  | 116160.03 | 94313.66  | 116160.03 | 94313.66  | 94313.66  | 94313.66  | 94313.66   | 0.583457821 | 0.230447599 | 85955.728 | Down | 0.111822601589555   | Isomorph 1 of growth factor receptor-like domain-containing protein 1 OS-Mus musculus GN-Nrg1 Pe1 SV-1        |
| PDPK     | P60487    | 7  | 7  | 28106     | 28675     | 37414.71  | 24472.43  | 33115.86  | 28051.54  | 28880     | 25914.43  | 30872.86  | 54514.14   | 0.584160058 | 0.234614813 | 30325     | Down | 0.150149812803204   | Pyridoxal phosphate phosphatase OS-Mus musculus GN-Pdpk Pe1 SV-1                                              |
| HK1      | P17710-2  | 37 | 37 | 61774.59  | 92009.62  | 75346.16  | 104073.51 | 97215.95  | 127694.57 | 140381.32 | 69874.83  | 80778.59  | 96135.95   | 0.584200583 | 0.233432667 | 93383.966 | Down | 0.15634448529636    | Isomorph HK1-18 of Hexokinase-1 OS-Mus musculus GN-Hk1                                                        |
| GLI1     | Q81W47    | 4  | 4  | 22343.64  | 21730.1   | 30454.5   | 24480     | 22279     | 17585.75  | 221       | 21062.25  | 3623      | 6233       | 0.584291173 | 0.232968113 | 24998.3   | Down | 0.1604013973254173  | Isomorph 1 of Gli-1 OS-Mus musculus GN-Gli1 Pe1 SV-1                                                          |
| OS16P1   | Q81W47    | 1  | 1  | 15175     | 4852      | NA        | 8602      | 10925     | 10453     | 8667      | NA        | 15924     | NA         | 0.584404013 | 0.232968113 | 9883.5    | Down | 0.24111102345386    | Isomorph 1 of Stimulatory factor 1 OS-Mus musculus GN-Ofp1 Pe1 SV-1                                           |
| PDIM1    | Q7O400    | 1  | 1  | 10752     | 15612     | 10458     | 1699      | 11291     | 3115      | 4806      | 10087     | NA        | NA         | 0.584862789 | 0.232856911 | 7874.4    | Down | 0.535309742729505   | PDZ and LIM domain protein 1 OS-Mus musculus GN-Pdim1 Pe1 SV-1                                                |
| HMG2     | P09802    | 2  | 2  | 17463.67  | 76681.5   | 112461    | 41637.5   | 68438.5   | 50036.5   | 62575.5   | 63836.5   | 72545.5   | 144581.5   | 0.585422195 | 0.232530826 | 74723.3   | Down | 0.271495311199318   | Non-histone chromosomal protein HMG-17 OS-Mus musculus GN-Hmg2 Pe1 SV-2                                       |
| GNHRNS-2 | Q9        | 30 | 30 | 134701    | 133326.32 | 130865.75 | 107420.68 | 114879.71 | 125614.29 | 120013.44 | 99004.44  | 127706.93 | 99893.84   | 0.585498662 | 0.232477802 | 135064.53 | Down | 0.060045861762028   | Isomorph 2 of Elongation factor 17, mitochondrial OS-Mus musculus GN-Hnrs-2                                   |
| LEF1     | Q91513    | 5  | 5  | 513.8     | 1385.5    | 2795.1    | 22793.2   | 16106.2   | 23253.67  | 42895.2   | 45758.21  | 64586.79  | 100053.75  | 0.585621916 | 0.2314918   | 29343.8   | Down | 0.111822601589555   | 1-Isomorph-GokA, peroxisomal OS-Mus musculus GN-Left1 Pe1 SV-1                                                |
| SH3BP1   | Q8H550-8  | 1  | 1  | 97562     | 102181    | 28557     | 46266     | 106191    | 66718     | 8231      | NA        | 117720    | NA         | 0.58583236  | 0.232275955 | 76151.4   | Down | 0.22357789670895    | Isomorph 8 of SH3 domain-containing kinase-binding protein 1 OS-Mus musculus GN-Sh3bp1                        |
| AGAP2    | Q3UH09    | 18 | 18 | 36794.06  | 50671.33  | 35786.5   | 62990.78  | 54063.56  | 62762.17  | 67670.42  | 47603.83  | 58917.89  | 28295.39   | 0.585871431 | 0.232186032 | 48062.46  | Down | 0.142711681212527   | Arf-GAP with GTPase, ANK repeat and PH domain-containing protein 2 OS-Mus musculus GN-Agap2 Pe1 SV-1          |
| NDOM2    | Q65029    | 1  | 1  | 1431      | 5113      | NA        | 12975     | 3216      | 3642      | 7966      | 3941      | 6872      | NA         | 0.58609711  | 0.232002721 | 5431.75   | Down | 0.386937124143928   | Nodal modulator 1 OS-Mus musculus GN-Ndom2 Pe1 SV-1                                                           |
| FGF4     | Q91513    | 14 | 14 | 41391.71  | 6133.96   | 54554.52  | 10691.43  | 69397.97  | 69613.67  | 79081.27  | 73827.21  | 68888.21  | 85545.64   | 0.586137212 | 0.231981632 | 61988.9   | Down | 0.1397732104143928  | Isomorph 1 of FGF4 homolog 4 OS-Mus musculus GN-Fgf4                                                          |
| FADD     | Q61160    | 1  | 1  | NA        | NA        | NA        | 1370      | 204       | 585       | 420       | NA        | 16537     | NA         | 0.586454931 | 0.231765357 | 1037      | Down | 0.12317386398296    | FAS-associated death domain protein OS-Mus musculus GN-Fadd Pe1 SV-1                                          |
| UBA5     | P62884    | 6  | 6  | 19900.58  | 91587     | 39945.67  | 62521.33  | 81591.33  | 78450.17  | 110484    | 61041.17  | 139174.67 | 17031      | 0.586881887 | 0.2314918   | 68051.7   | Down | 0.15486893045487    | Ubiquitin-protein transferase 1 OS-Mus musculus GN-Uba5 Pe1 SV-1                                              |
| ATF12F1  | Q91402    | 6  | 6  | 57877.17  | 172571.67 | 241208.33 | 154176.33 | 158785    | 151435.67 | 157417.17 | 189325    | 23133.33  | 274989.17  | 0.58715109  | 0.231102207 | 181546.7  | Down | 0.225201721783651   | V-type protein ATPase subunit 1 OS-Mus musculus GN-Atf12f1 Pe1 SV-2                                           |
| CTD1     | Q91513    | 4  | 4  | 14605.33  | 1385.5    | 16972.25  | 34963.6   | 28285.33  | 28885.33  | 24205.33  | 1784      | 28202.33  | 14086      | 0.587261174 | 0.230716174 | 28202.33  | Down | 0.16862117114086    | Isomorph 1 of CTD1 homolog 4 OS-Mus musculus GN-Ctd1 Pe1 SV-2                                                 |
| VSNL1    | P62761    | 1  | 1  | 4328      | 5888      | NA        | 19374     | 6181      | 7933      | 6941      | NA        | 5526      | NA         | 0.58729498  | 0.230774557 | 8942.75   | Down | 0.395181298836137   | Vesicle-like protein 1 OS-Mus musculus GN-Vsnl1 Pe1 SV-2                                                      |
| BAP1GAP  | A2AL55-4  | 3  | 3  | 13454.5   | 15340.5   | 7577      | 22797     | 18472     | 16392.5   | 13915     | 18455     | 15893     | NA         | 0.587378943 | 0.230715789 | 15528.2   | Down | 0.14448484570379    | Isomorph 4 of Rap1 GTPase-activating protein 1 OS-Mus musculus GN-Bap1gap                                     |
| ADAM2    | Q8R1V6-18 | 4  | 4  | 12754     | 23481     | 941.33    | 57798.67  | 26711     | 44438     | 49062     | 18709.33  | 14272     | NA         | 0.587822632 | 0.230709153 | 24217.2   | Down | 0.38352694070298    | Isomorph 18 of Disintegrin and metalloproteinase domain-containing protein 2 OS-Mus musculus GN-Adam2         |
| FNAC     | Q2S214    | 6  | 6  | 6232.14   | 61002.4   | 38127.6   | 101897.4  | 67316     | 88184     | 14572     | 14164     | 69392.14  | 83208.14   | 0.587911476 | 0.230716174 | 83208.14  | Down | 0.                  |                                                                                                               |

|          |           |     |     |           |           |           |           |           |           |           |           |             |             |               |             |           |                 |                                                      |                                                                                        |                                                                                                            |
|----------|-----------|-----|-----|-----------|-----------|-----------|-----------|-----------|-----------|-----------|-----------|-------------|-------------|---------------|-------------|-----------|-----------------|------------------------------------------------------|----------------------------------------------------------------------------------------|------------------------------------------------------------------------------------------------------------|
| MAPK1    | PC63085   | 6   | 6   | 29613.17  | 45605.1   | 15058.5   | 87121.67  | 45558.33  | 62338     | 64598.83  | 12106.17  | 32023.17    | 59825.1     | 0.604862585   | 0.218325855 | 44591.34  | 35328.73        | Down                                                 | 0.335883708393238                                                                      | Myosin-activated protein kinase 1 OS=Mus musculus GN=Mapk1 PE=1 Sv=3                                       |
| PMK1     | ORC8P5    | 3   | 3   | 33796     | 41491.67  | 17492     | 38254     | 40072.67  | 44405     | 39735.33  | 16253     | 58200.67    | NA          | 0.604902783   | 0.218287905 | 34221.468 | 39648.5         | Up                                                   | 0.2123666375471                                                                        | Partner of V14 and mako OS=Mus musculus GN=V14b PE=2 Sv=2                                                  |
| PTD29    | PTD29     | 1   | 1   | 11573.7   | 114348    | 72572     | 70947     | 98751     | 91491     | 104244    | 67039     | 492302      | 0.605054955 | 0.218205178   | 34608.8     | 34602.2   | Up              | 0.15556351908336                                     | Ena/VASP-like protein OS=Mus musculus GN=Ena PE=1 Sv=2                                 |                                                                                                            |
| ACAA1P   | ORC9V6    | 11  | 11  | 111728.18 | 112366.27 | 140821.09 | 54937.91  | 99503.36  | 86312.73  | 93852.62  | 147852.55 | 117121.1    | 121389.64   | 0.605103065   | 0.218195574 | 103781.05 | 113335.02       | Up                                                   | 0.126583033066497                                                                      | 3-beta-actin OS=Mus musculus GN=Acta3 PE=1 Sv=1                                                            |
| SIAMP    | Q3U0R3    | 1   | 1   | 2639      | 47971     | 18688     | 12344     | 16085     | 17388     | NA        | 4508      | NA          | 0.605198369 | 0.217535711   | 9617        | 12600.33  | Up              | 0.396556565874138                                    | Membrane of Sarcolemmal membrane-associated protein OS=Mus musculus GN=Siamp PE=3 Sv=3 |                                                                                                            |
| PTM3     | OR8R85    | 35  | 35  | 12728.3   | 131133.11 | 108642.39 | 108775.35 | 114172.03 | 127204.33 | 123784.33 | 101644.3  | 123259.09   | 919234      | 0.60611493    | 0.217450451 | 118102.33 | 114149.81       | Down                                                 | 0.049108993489052                                                                      | Elongation factor 1b, mitochondrial OS=Mus musculus GN=Ef1b PE=1 Sv=1                                      |
| CY2B2    | PTM3      | 1   | 1   | 27983     | 29871     | NA        | 24544     | 400       | 19968     | NA        | NA        | 19968       | NA          | 0.606170479   | 0.21742777  | 36068.25  | 27134           | Down                                                 | 0.47132                                                                                | Factor 1 of Cytochrome-2 OS=Mus musculus GN=Cy2b2 PE=1 Sv=1                                                |
| HNBPNA1  | P93122-2  | 10  | 10  | 92788.75  | 87253.5   | 57531.8   | 74287.8   | 70961.3   | 34245.6   | 76881.1   | 87217.1   | 50757.3     | 51757.3     | 0.60623363868 | 0.2173753   | 78256.38  | NA              | Up                                                   | 0.09625236336868                                                                       | Membrane Short of heterotrimeric nuclear ribonucleoprotein A1 OS=Mus musculus GN=Hnbpna1 PE=1 Sv=1         |
| SDC2     | Q6V555    | 2   | 2   | 6203      | 84315.1   | 13112.5   | 18997.5   | 15761.5   | 28687.5   | 20310     | NA        | 0.606570109 | 0.21718952  | 12513.2       | 16847.667   | Up        | 0.4293980208921 | Protein selectin-2 OS=Mus musculus GN=Scd2 PE=2 Sv=1 |                                                                                        |                                                                                                            |
| TMD02    | Q0W8K7-1  | 14  | 14  | 147096.55 | 157949.27 | 140778.82 | 120412    | 136250.27 | 193777.91 | 138779.91 | 156408.55 | 164686.64   | 137491.82   | 144624.18     | 0.616857885 | 140497.38 | 144813.02       | Up                                                   | 0.0431480717756166                                                                     | Isomorph 1 of Tropomodulin-2 OS=Mus musculus GN=Tmd02 PE=1 Sv=1                                            |
| SLC25A6  | Q6G204    | 1   | 1   | 31528     | 31506     | 5032      | 135585    | 34691     | 91006     | 52560     | 27437     | NA          | 0.607134129 | 0.216715251   | 48808       | 63341     | Up              | 0.420424915316781                                    | Solute carrier family 25 member 6 OS=Mus musculus GN=Slc25a6 PE=1 Sv=1                 |                                                                                                            |
| TACD1    | ORC077    | 4   | 4   | 15772.15  | 17385.5   | 11131.5   | 12685     | 14661.25  | 14919.25  | 14904.5   | 20374.75  | 17134       | 12304       | 0.607410297   | 0.216515907 | 15474.75  | 15593.1         | Up                                                   | 0.0895271774031799                                                                     | Translational activator of cytochrome c oxidase 1 OS=Mus musculus GN=Tacd1 PE=1 Sv=1                       |
| OCAD1    | Q9C0C0-1  | 3   | 3   | 10979.33  | 13428     | 10224     | 17090     | 12916.67  | 14848.33  | 12563     | 3160.67   | 14581.3     | NA          | 0.612677778   | 0.216774518 | 13089.6   | 13089.6         | Down                                                 | 0.200874041966982                                                                      | Isomorph 3 of OCA domain-containing protein 1 OS=Mus musculus GN=Ocad1 PE=1 Sv=1                           |
| ILK      | OS5222    | 1   | 1   | 4822      | 7353      | NA        | 10490     | 3464      | 10800     | 7238      | NA        | 5251        | NA          | 0.608074493   | 0.216069671 | 6532.25   | 7763            | Up                                                   | 0.249034281728204                                                                      | Integrin-linked protein kinase OS=Mus musculus GN=Ilk PE=1 Sv=2                                            |
| HSB      | OR8340    | 1   | 1   | 8301      | 10114     | 7158      | 13393     | 9059      | 13001     | 9762      | 7058      | 6768        | 7175        | 0.608123209   | 0.216084621 | 8605      | 8781            | Down                                                 | 0.13404100832893                                                                       | Iron-sulfur cluster co-chaperone protein Hsb, mitochondrial OS=Mus musculus GN=Hsb PE=2 Sv=2               |
| ITCB     | OR9144    | 30  | 30  | 51465.8   | 56929.59  | 66705.09  | 3702.93   | 30221.5   | 65846.23  | 56392.27  | 57427.4   | 80029.63    | 86572.93    | 0.608442723   | 0.215994486 | 54321.258 | 59272.803       | Up                                                   | 0.103810251227291                                                                      | Cytoslin-binding protein OS=Mus musculus GN=Iccb PE=1 Sv=1                                                 |
| APPL2    | ORC3G9    | 1   | 1   | 1903      | 4861      | 3513      | 1505      | 2810      | 942       | 4027      | 7197      | 2711        | NA          | 0.608795818   | 0.215682566 | 24318     | 3719.25         | Up                                                   | 0.345834091455247                                                                      | DCC-interacting protein 13-beta OS=Mus musculus GN=Appl2 PE=2 Sv=1                                         |
| COP5     | OR8544    | 2   | 2   | 3071      | 3327      | 1258      | 2253.5    | 2536      | 3303.5    | 3058.5    | NA        | 1990        | NA          | 0.609533205   | 0.214774604 | 2489.1    | 2784            | Up                                                   | 0.161535019193918                                                                      | COP5 signalosome complex subunit 4 OS=Mus musculus GN=Cop4 PE=1 Sv=1                                       |
| IPG5     | OR88C5    | 1   | 1   | 2097      | 1326      | 3228      | 1533      | 3997      | 2126      | 3083      | 3158      | 2018        | NA          | 0.610074246   | 0.214650309 | 2316.2    | 2596.25         | Up                                                   | 0.164669478507804                                                                      | Importin-5 OS=Mus musculus GN=Ipg5 PE=1 Sv=3                                                               |
| PMF18    | OR8619    | 3   | 3   | 51099     | 3650      | 16219     | 4437.5    | 38724     | 31140     | 6528      | 2354      | 42003       | NA          | 0.610492325   | 0.214458405 | 37070     | 32426.25        | Down                                                 | 0.157060493685323                                                                      | Splicing factor U2AF 2-kDa subunit 4 OS=Mus musculus GN=U2af14 PE=1 Sv=1                                   |
| MLM18    | P95993-3  | 4   | 4   | 20683.75  | 26406     | 26168     | 31990.75  | 25104     | 32588.5   | 37864.75  | 19562.75  | 35247.75    | 15679.5     | 0.610544056   | 0.214282672 | 26070.5   | 2875.25         | Up                                                   | 0.141276675527897                                                                      | Isomorph beta-2 of Protein phosphatase 18 OS=Mus musculus GN=Ppm1b PE=1 Sv=1                               |
| LN7A     | OR8250    | 15  | 15  | 69083.47  | 73218.8   | 65308.6   | 61326.87  | 76813.93  | 75460.93  | 71119.27  | 71894.87  | 79217       | 14041.47    | 0.611752106   | 0.214342464 | 69150.334 | 62346.708       | Down                                                 | 0.149424384093832                                                                      | Protein lin-7 homolog A OS=Mus musculus GN=Lin7a PE=1 Sv=2                                                 |
| SGP1     | ORC037-8  | 18  | 18  | 15726.18  | 15747.18  | 60529.88  | 46461.12  | 57100.41  | 48844.18  | 53013.17  | 52508.12  | 61675.71    | 54210.88    | 0.61218079    | 0.21318079  | 5578.954  | 45050.12        | Down                                                 | 0.044388100828335                                                                      | Isomorph 7 of S13-containing Gb2-like protein 3-interacting protein 1 OS=Mus musculus GN=Sgp1 PE=1 Sv=1    |
| CACYP    | OS0C19    | 4   | 4   | 71691.5   | 77314.25  | 54433.5   | 83368     | 80020.25  | 84711     | 88134.5   | 71448     | 63711.5     | 87065.1     | 0.612399397   | 0.212951013 | 74707.9   | 69093.8         | Up                                                   | 0.117108759795946                                                                      | Cytoslin-binding protein OS=Mus musculus GN=Cacyp PE=1 Sv=1                                                |
| DLGAP1   | ORC0415-3 | 14  | 14  | 17144.67  | 20757.42  | 12101.08  | 22997.42  | 25311.17  | 20668.5   | 21084.83  | 13573.75  | 27706.75    | 2153.17     | 0.6127697729  | 0.212753739 | 19662.352 | 17037.4         | Up                                                   | 0.206703771164817                                                                      | Isomorph 3 of Disks large-associated protein 1 OS=Mus musculus GN=Dlgap1 PE=1 Sv=1                         |
| ATP12A   | OR21W8    | 11  | 11  | 111125.27 | 274652.64 | 143047.36 | 278180.82 | 270789.78 | 279025.1  | 418557.17 | 177623.27 | 171042.36   | 190700.09   | 0.61276401    | 0.212708385 | 215959.16 | 247469.73       | Up                                                   | 0.196176907625251                                                                      | Potassium-transporting ATPase alpha chain 2 OS=Mus musculus GN=Atp12a PE=1 Sv=3                            |
| PM2B     | P70195    | 6   | 6   | 54993.67  | 60799.67  | 53574.17  | 65132.67  | 52081     | 55900.17  | 61662.17  | 54146.83  | 61979.17    | 60895.17    | 0.613222027   | 0.212674407 | 57436.236 | 58956.702       | Up                                                   | 0.0370496150149714                                                                     | Proteasome subunit beta type 1 OS=Mus musculus GN=Pmb2 PE=1 Sv=1                                           |
| BP5A1    | P97151    | 37  | 37  | 84738.47  | 103551.95 | 81491.38  | 124119.86 | 83361.41  | 92556.76  | 99066.73  | 89282.54  | 97275.35    | 90066.73    | 0.613280673   | 0.212380673 | 54912.6   | 89934.78        | Down                                                 | 0.202703992311288                                                                      | 49S ribosomal protein S3a OS=Mus musculus GN=Bp5a1 PE=1 Sv=1                                               |
| PH9A5    | P94945    | 1   | 1   | 24985     | 24985     | NA        | 24985     | 24985     | 24985     | 24985     | 24985     | 24985       | 24985       | 0.613280673   | 0.212380673 | 54912.6   | 89934.78        | Down                                                 | 0.202703992311288                                                                      | 49S ribosomal protein S3a OS=Mus musculus GN=Bp5a1 PE=1 Sv=1                                               |
| CACNB2   | ORC7C2-1  | 3   | 3   | 55522.67  | 61184.67  | 46242.67  | 26521.33  | 59306.33  | 50562.67  | 53856.67  | 29282.67  | 58679.33    | 33820.67    | 0.613494239   | 0.212189511 | 49755.354 | 45240.402       | Down                                                 | 0.13724527463202                                                                       | Isomorph 2 of Voltage-dependent L-type calcium channel subunit beta-2 OS=Mus musculus GN=Cacnb2 PE=1 Sv=1  |
| MRPL12   | ORC815    | 2   | 2   | 25303.5   | 39178     | 26739.5   | 31982     | 28727.5   | 30778     | 27925.5   | 32291     | 27927.5     | 29273.5     | 0.61400575    | 0.21140338  | 30606.5   | 32124.5         | Up                                                   | 0.069741653840778                                                                      | 39S ribosomal protein L12, mitochondrial OS=Mus musculus GN=Mrpl12 PE=1 Sv=2                               |
| TUBB     | P98904    | 101 | 101 | 61008.56  | 74927     | 60865.13  | 77975.35  | 55379.7   | 60126.33  | 81006.63  | 50724.67  | 66379.68    | 65662.68    | 0.614051126   | 0.21140338  | 65662.68  | 69001.26        | Up                                                   | 0.069741653840778                                                                      | Tubulin beta-4 chain OS=Mus musculus GN=Tubb5 PE=1 Sv=1                                                    |
| ANKK18   | ORC813-1  | 3   | 3   | 5121.67   | 7492      | 3894.33   | 18091.75  | 8683.33   | 14313.33  | 10921.67  | 16483.67  | 35284.67    | 6153520.24  | 0.210734813   | 0.210734813 | 889.81    | 10911.83        | Up                                                   | 0.275584854518964                                                                      | Head-Gab1-related and sterile alpha helix domain-containing protein 18 OS=Mus musculus GN=Ankk18 PE=1 Sv=1 |
| GM1389   | Q3U0L5    | 1   | 1   | 31434     | 35826     | 12126     | 29699     | 26560     | 30441     | 23527     | 33293     | 22227       | 33293       | 0.614221264   | 0.208128    | 33293     | 22227           | Up                                                   | 0.15387058572749                                                                       | Uncharacterized protein C11orf96 homolog OS=Mus musculus GN=Ank2 PE=1 Sv=2                                 |
| RA708A   | P47708    | 45  | 45  | 59641.14  | 57117.79  | 39483.3   | 54167.07  | 69482.51  | 63939.12  | 65223.23  | 25102.02  | 73222.7     | 20184.74    | 0.617189432   | 0.209581519 | 59599.362 | 49540.362       | Down                                                 | 0.17603289176692                                                                       | Regulatorin-3A OS=Mus musculus GN=Ra708a PE=1 Sv=2                                                         |
| RG20A    | Q6G20A    | 1   | 1   | 7420      | 9554      | NA        | 7947      | 4094      | 5677      | 5677      | NA        | 4898        | NA          | 0.617293231   | 0.209552748 | 4781.26   | 5463.6687       | Up                                                   | 0.03609345446466                                                                       | Subunit of G-protein signaling 20 OS=Mus musculus GN=Ra20 PE=1 Sv=1                                        |
| CENPL    | ORC802    | 2   | 2   | 6350      | 9450      | 6781.5    | 6399.5    | 6399.5    | 6354.5    | 6354.5    | NA        | 5959.5      | NA          | 0.617336481   | 0.2091401   | 6477      | 6370.38         | Up                                                   | 0.14567040195918                                                                       | Genitofemoral nerve and member 9, mitochondrial OS=Mus musculus GN=Cenpl PE=1 Sv=2                         |
| UHRF1BP1 | A2R54     | 3   | 3   | 3092.67   | 6035.33   | 1247.67   | 13119.67  | 7239.33   | 9500.33   | 8027.67   | NA        | 4803.67     | NA          | 0.617822824   | 0.209136602 | 6146.94   | 7345.83         | Up                                                   | 0.27618974182539                                                                       | UHRF1-binding protein 1-like OS=Mus musculus GN=Uhrf1bp1 PE=1 Sv=2                                         |
| ORC8TV2  | CPHF7     | 2   | 2   | 6902      | 2777      | 2988.5    | 6253      | 5674.5    | 6065.5    | 8587      | 2790.5    | 5526.5      | NA          | 0.617866405   | 0.209105418 | 4919      | 5692.375        | Up                                                   | 0.21066551219827                                                                       | Cleavage and polyadenylation specificity factor subunit 7 OS=Mus musculus GN=Cpf7 PE=1 Sv=2                |
| PURR     | OS1295    | 28  | 28  | 50562.67  | 64080.59  | 42391.67  | 68881.67  | 58941.07  | 60391.56  | 62507.7   | 52499.7   | 69878.56    | 15768.26    | 0.61805407    | 0.208972929 | 57771.94  | 52227.156       | Up                                                   | 0.14556879033344                                                                       | Transcriptional activator protein Pur-beta OS=Mus musculus GN=Purr PE=1 Sv=3                               |
| OS0210   | CPD102    | 3   | 3   | 20522.67  | 79026     | 42194.2   | 13299.2   | 13299.2   | 42181.2   | 43726.2   | 15729.67  | 50010.9     | NA          | 0.618276938   | 0.209270216 | 24095.734 | 28741.148       | Up                                                   | 0.00092737740318                                                                       | Cytoslin-binding protein OS=Mus musculus GN=Os0210 PE=1 Sv=1                                               |
| OSTF1    | Q64222    | 1   | 1   | 12504     | 14565     | 10075     | 18777     | 18391     | 15565.5   | 2591      | 12213.5   | NA          | 0.61841823  | 0.2087137     | 14213.1     | 12210     | Down            | 0.219481283100055                                    | Osteocalcin-stimulating factor 1 OS=Mus musculus GN=Ostf1 PE=1 Sv=2                    |                                                                                                            |
| LD02     | B5TVM2    | 10  | 10  | 21731.38  | 41848     | 14941.88  | 66867     | 54628.5   | 62918.38  | 71510.88  | 20929.88  | 83016.12    | 29923       | 0.618732122   | 0.20875849  | 40403.352 | 47339.652       | Up                                                   | 0.234656353647893                                                                      | Immunoglobulin-like domain-containing receptor 2 OS=Mus musculus GN=Ld02 PE=2 Sv=2                         |
| SNRB     | P47758    | 1   | 1   | 11162     | 10782     | 13772     | 23298     | 26560     | 30638     | 16451     | 23092     | NA          | 0.618476807 | 0.208676582   | 21276       | 24185.25  | Up              | 0.184009345446466                                    | Signal recognition particle receptor subunit beta OS=Mus musculus GN=Snrb PE=1 Sv=1    |                                                                                                            |
| ORC8H1   | PTD13     | 2   | 2   | 2145.5    | 36450.5   | 2362.5    | 16124     | 2362.5    | 24718.5   | NA        | 30474     | NA          | 0.618476807 | 0.208676582   | 21276       | 24185.25  | Up              | 0.184009345446466                                    | Signal recognition particle receptor subunit beta OS=Mus musculus GN=Snrb PE=1 Sv=1    |                                                                                                            |
| SLC9A3B1 | P70441    | 25  | 25  | 61432.96  | 55985.08  | 47409.56  | 48447.68  | 60355     | 59360.04  | 54130.24  | 31485.68  | 75931.36    | 72427.78    | 0.618604241   | 0.20887107  | 54702.056 | 49662.92        | Down                                                 | 0.139424968058684                                                                      | Na+/H+ exchange regulatory cofactor NHE-8F1 OS=Mus musculus GN=Slc9a3b1 PE=1 Sv=1                          |
| MRPL15   | ORC9P5-2  | 1   | 1   | 4065      | 4136      | 1306      | 8740      | 3880      | 6256      | 5842      | NA        | 4530        | NA          | 0.618916516   | 0.208387658 | 4422.4    | 5122.667        | Down                                                 | 0.210265497443475                                                                      | Isomorph 2 of 39S ribosomal protein L5, mitochondrial OS=Mus musculus GN=Mrpl15 PE=1 Sv=1                  |
| SUGP2    | ORC809    | 2   | 2   | 19313.5   | 15490     | 97        |           |           |           |           |           |             |             |               |             |           |                 |                                                      |                                                                                        |                                                                                                            |

|         |          |    |    |           |           |           |           |           |           |           |           |           |             |             |             |           |           |                   |                                                                      |                                                                                                                         |
|---------|----------|----|----|-----------|-----------|-----------|-----------|-----------|-----------|-----------|-----------|-----------|-------------|-------------|-------------|-----------|-----------|-------------------|----------------------------------------------------------------------|-------------------------------------------------------------------------------------------------------------------------|
| TTCCB   | Q9D6E4   | 4  | 1  | 34175.75  | 36731.75  | 35347.25  | 25814.5   | 34439.25  | 35586.25  | 34859     | 55708.25  | 42704     | 12900       | 0.6365737   | 0.19642693  | 32701.7   | 36351.1   | Down              | 0.152649260143762                                                    | Tetratricopeptide repeat protein 9b O5-Mus-musculus GN-TtU9b Pe2 SV-1                                                   |
| APBA1   | B2BUU5-2 | 1  | 1  | 4249      | 5937      | N/A       | 11427     | 4128      | 7440      | 5871      | N/A       | 2658      | N/A         | 0.63773478  | 0.195623795 | 6435.25   | 5232      | Down              | 0.2735662685245                                                      | Form of Amyloid beta A4 precursor protein-binding family A member 1 O5-Mus-musculus GN-Apba1                            |
| GN64    | Q9D153   | 4  | 4  | 25278.25  | 38953.5   | 34259.25  | 59791.75  | 39396.25  | 47499.25  | 52131.25  | 41433     | 46652     | 27056       | 0.63812065  | 0.19503086  | 39475.8   | 42953.3   | Down              | 0.12140471020204                                                     | Guanine nucleotide-binding protein G12G13G12D subunit gamma 4 O5-Mus-musculus GN-Gn64 Pe2 SV-1                          |
| ACOX1   | Q9D900   | 5  | 5  | 19777.2   | 24266     | 18008.6   | 18008.4   | 32407     | 26368.8   | 25356.1   | 10205.4   | 34895.4   | N/A         | 0.194853088 | 0.194853088 | 2103.84   | 24183.45  | Down              | 0.201454050884001                                                    | Peroxisomal acyl-coenzyme A oxidase 1 O5-Mus-musculus GN-Acox1 Pe1 SV-5                                                 |
| SBF1    | Q6Z672   | 6  | 6  | 10274.67  | 18089.83  | 19441.83  | 32360.31  | 21234     | 27645.83  | 28712.17  | 9893.17   | 16774     | 3513.83     | 0.63876768  | 0.194717522 | 20278.03  | 13708.4   | Down              | 0.228445771192471                                                    | Myotubularin-related protein 3 O5-Mus-musculus GN-SBF1 Pe1 SV-2                                                         |
| RPS3    | P62908   | 12 | 12 | 54201.58  | 72371     | 63180.08  | 59791.33  | 68716.08  | 67876.17  | 74726.75  | 54173.42  | 76083.75  | 18433.92    | 0.63895805  | 0.194570455 | 63858.214 | 58258.80  | Down              | 0.133396188284881                                                    | 40S ribosomal protein S3 O5-Mus-musculus GN-Rps3 Pe1 SV-1                                                               |
| CRP2    | P41739   | 2  | 2  | 27174.5   | 71160     | 67562     | 39535     | 61861.5   | 72728     | 79378     | 94202     | 81220     | 51866       | 0.63912459  | 0.193725912 | 6247.4    | 67079.17  | Down              | 0.10095014767833                                                     | Osmoregulatory protein 2 O5-Mus-musculus GN-Crp2 Pe1 SV-1                                                               |
| DTNML2  | Q2D0M5   | 2  | 2  | 801.1     | 1917      | N/A       | 2055      | 805       | 1213      | 2055      | 805       | 1213      | 2055        | 0.193122596 | 0.193122596 | 4551      | 1257      | Down              | 0.272606617314312                                                    | Osmoreg. NaCl chan. 2, cytoplasmic O5-Mus-musculus GN-Dtnml2 Pe1 SV-1                                                   |
| UBIZO2  | Q6Z713   | 11 | 11 | 16281.1   | 25904.4   | 19824.6   | 34644.4   | 26523.1   | 34372.4   | 37329.4   | 25102     | 23693.9   | 15104.7     | 0.641233059 | 0.192983179 | 24635.52  | 27093.44  | Down              | 0.117203657285056                                                    | Ubiquitin-conjugating enzyme E2 O O5-Mus-musculus GN-Ubzo2 Pe1 SV-3                                                     |
| ABT1    | Q8BCW5-5 | 16 | 16 | 97448.06  | 93933.69  | 68092     | 107209.44 | 96453.44  | 103362.81 | 98336.69  | 77335.44  | 106555.12 | 58683.81    | 0.641233059 | 0.192983179 | 92747.326 | 87370.774 | Down              | 0.0861549168940099                                                   | isoform 5 of Abl interactor 1 O5-Mus-musculus GN-Abt1                                                                   |
| TTBR1   | Q6W9Z3   | 3  | 3  | 10982.31  | 11808     | N/A       | 11058.67  | 10441.31  | 11217     | 12093.14  | N/A       | 7608.67   | N/A         | 0.642520963 | 0.192451398 | 11059.581 | 10308.331 | Down              | 0.101489430283059                                                    | Tubulin kinase 1 O5-Mus-musculus GN-TTBR1 Pe2 SV-3                                                                      |
| GNL1    | P31616   | 1  | 1  | 16735     | 28085     | 13246     | 30248.3   | 9710.75   | 134009.25 | 101246    | 22125.5   | 64609.75  | N/A         | 0.193184461 | 0.193184461 | 24462.16  | 57316.333 | Down              | 0.36105342074148                                                     | Guanine nucleotide-binding protein-like 1 O5-Mus-musculus GN-Gnl1 Pe2 SV-4                                              |
| CPK3    | Q05520   | 11 | 11 | 41371.3   | 46130.9   | 40241.7   | 53321.4   | 56734.2   | 44501.6   | 46305.7   | 50086.6   | 36500.2   | 0.192108524 | 0.192108524 | 45203.7     | 47146.96  | Down      | 0.060733885490008 | Pyruvate carboxylase, mitochondrial O5-Mus-musculus GN-Cpk3 Pe1 SV-1 |                                                                                                                         |
| HCC5    | P53702   | 3  | 3  | 18081     | 15570     | 19897.33  | 23144.67  | 12818.33  | 17559     | 19219     | 5872.67   | 17935.33  | 21117.33    | 0.64276591  | 0.191947164 | 17002.26  | 16340.66  | Down              | 0.131675424284969                                                    | Cytochrome c-type heme lyase O5-Mus-musculus GN-Hcc5 Pe1 SV-2                                                           |
| PMR1    | P13182   | 7  | 7  | 14318     | 25803.52  | 6392.71   | 69240.71  | 29001.29  | 43978.29  | 42478.71  | 5011.71   | 18393.57  | 3734.52     | 0.642831737 | 0.191901363 | 28931.256 | 22283.57  | Down              | 0.37800809127914                                                     | 6-phosphogluconate lyase O5-Mus-musculus GN-PMR1 Pe1 SV-4                                                               |
| GNP2    | Q61875   | 4  | 4  | 48397.5   | 85675.28  | 45204.5   | 30248.3   | 59710.75  | 134009.25 | 101246    | 22125.5   | 64609.75  | N/A         | 0.642912303 | 0.193184461 | 24462.16  | 57316.333 | Down              | 0.36105342074148                                                     | Guanine nucleotide-binding protein-like 1 O5-Mus-musculus GN-Gnp2 Pe2 SV-2                                              |
| TBCD    | Q8BVW0   | 3  | 3  | 1871      | 2516.33   | 971.33    | 11807.33  | 5779.67   | 8847.33   | 8094      | 1876.67   | 4496      | N/A         | 0.643053066 | 0.191752822 | 4589.132  | 5028.5    | Down              | 0.344903340368374                                                    | Tubulin-specific chaperone D O5-Mus-musculus GN-Tbcd Pe2 SV-1                                                           |
| SGP1    | Q8V037-4 | 16 | 16 | 60884.2   | 60763.93  | 69944.73  | 46920.67  | 59939.67  | 50746.6   | 52528.93  | 55645.47  | 62780.87  | 61439       | 0.64320067  | 0.191693083 | 50909.64  | 57174.174 | Down              | 0.04760060551149                                                     | isoform 4 of SH3-containing GRB2-like protein 3-interacting protein 1 O5-Mus-musculus GN-Sgp1                           |
| SHTN1   | Q8C2Q9   | 3  | 3  | 3764.57   | 5415      | 4483.67   | 9537.67   | 4666.67   | 9535.33   | 6325      | 1365.33   | 9351      | N/A         | 0.643213663 | 0.191436626 | 5574.396  | 6644.165  | Down              | 0.253287936083229                                                    | Shoonin 1 O5-Mus-musculus GN-Shtn1SVB Pe1 SV-1                                                                          |
| PP2R2B  | Q5CWR4-5 | 1  | 1  | 18385     | 21927     | 7519      | 75236     | 18506     | 24422     | 19982     | N/A       | 11445     | N/A         | 0.644200067 | 0.192078703 | 28314.6   | 21616.333 | Down              | 0.381424222097107                                                    | isoform 3 of Serine/threonine-protein phosphatase 2A 55 kDa regulatory subunit 1 beta isoform O5-Mus-musculus GN-Pp2r2b |
| GRNPR   | Q91253   | 4  | 4  | 30553     | 48601     | 20350.5   | 58924     | 46567     | 46547.5   | 45724     | N/A       | 40821.5   | N/A         | 0.644373726 | 0.190662176 | 40867.1   | 44364.333 | Down              | 0.118460214892204                                                    | Glyoxylate reductase/hydroxypropanoyl reductase O5-Mus-musculus GN-Grnp1 Pe1 SV-3                                       |
| MICU1   | Q8BCV5-3 | 3  | 3  | 8570.67   | 10822     | 5388.67   | 16150.67  | 13766     | 15789.33  | 13357.67  | N/A       | 8069      | N/A         | 0.644380067 | 0.190857902 | 10939.602 | 12709.667 | Down              | 0.180624732211397                                                    | isoform 3 of Calcium uptake protein 1, mitochondrial O5-Mus-musculus GN-Micu1                                           |
| STAU2   | Q8C67-3  | 2  | 2  | 13972.5   | 19365.5   | 4575      | 20705     | 5040      | 22369.5   | 18750.5   | 3819      | 15453.5   | N/A         | 0.645021857 | 0.190762315 | 12711.6   | 10599.125 | Down              | 0.2455529566527                                                      | isoform 3 of Double-stranded RNA-binding protein Staufen homolog 2 O5-Mus-musculus GN-Stau2                             |
| SHALB2  | Q8BVZ5   | 17 | 17 | 57792.47  | 95550.24  | 57020.71  | 76207.35  | 66230.82  | 78796.94  | 68420     | 62316.47  | 59023.29  | 12147.18    | 0.645026102 | 0.190797023 | 63760.318 | 97717.79  | Down              | 0.094251990638899                                                    | isoform 2 of Calcium uptake protein 1, mitochondrial O5-Mus-musculus GN-Shalb2                                          |
| RPMX2   | Q8W67-3  | 2  | 2  | 11974     | 10742     | 13863.5   | 20025     | 16585.5   | 18911     | 10207     | 5381.5    | 17089     | N/A         | 0.645735903 | 0.189945613 | 14637.6   | 18977.125 | Down              | 0.1826952790805                                                      | isoform 3 of RNA binding protein fox-1 homolog 3 O5-Mus-musculus GN-Rpmx2                                               |
| PFKFB3  | P46571   | 13 | 13 | 18567.92  | 20337.69  | 16236     | 25486.85  | 21294.77  | 22847.31  | 22064.08  | 15457.31  | 24643.46  | 8857.15     | 0.645739303 | 0.189906059 | 16274.66  | 18773.867 | Down              | 0.117907910045158                                                    | 26S protease regulatory subunit 7 O5-Mus-musculus GN-Pfkfb3 Pe1 SV-5                                                    |
| WASF1   | Q8BVH6   | 25 | 25 | 36294.91  | 41472     | 10127.39  | 40976.52  | 42013.22  | 41324.1   | 43441.91  | 30967.17  | 46806.81  | 13124.52    | 0.646022248 | 0.189617897 | 38102.08  | 35332.927 | Down              | 0.124662609510086                                                    | Wiskott-Aldrich syndrome protein family member 1 O5-Mus-musculus GN-Wasf1 Pe1 SV-2                                      |
| CTD1287 | Q8C187   | 1  | 1  | 752       | 1458      | N/A       | 7645      | N/A       | 5322      | 6059      | N/A       | 1235      | N/A         | 0.189717579 | 0.189717579 | 3435.75   | 4897.333  | Down              | 0.388447545740706                                                    | Knottin-related, DVI1 domain-containing protein 2 O5-Mus-musculus GN-CTD1287 Pe1 SV-1                                   |
| CPN50   | P31792   | 1  | 1  | 17372     | 3443      | 17071     | 18019     | 17922     | 17444     | 13065     | 17472     | 14962     | N/A         | 0.189219614 | 0.189219614 | 14962     | 16445.15  | Down              | 0.138671195320043                                                    | Golgi-raft domain-containing protein 5 O5-Mus-musculus GN-Cpn50 Pe1 SV-1                                                |
| ABU1    | Q8BCW3-3 | 17 | 17 | 91788.12  | 88408.18  | 64086.59  | 101822.35 | 91024.76  | 97671.94  | 92850.06  | 73068.65  | 95048.94  | 35318.86    | 0.647515706 | 0.188749693 | 87426     | 82044.894 | Down              | 0.085052280640424                                                    | isoform 2 of Abl interactor 1 O5-Mus-musculus GN-Abu1                                                                   |
| NDUFS6  | P52303   | 18 | 18 | 179476.67 | 156173.06 | 170818.89 | 88085.83  | 167199.44 | 135960.72 | 130954.11 | 165569.89 | 165495.17 | 77932.48    | 0.647580829 | 0.188720718 | 153590.78 | 134148.62 | Down              | 0.087008308457971                                                    | NADH dehydrogenase (ubiquinone) iron-sulfur protein 6, mitochondrial O5-Mus-musculus GN-Ndufs6 Pe1 SV-2                 |
| PCPB1   | P63131   | 29 | 29 | 97177.5   | 55347.46  | 58053.02  | 94777.46  | 58053.02  | 94777.46  | 58053.02  | 94777.46  | 58053.02  | 94777.46    | 0.647580829 | 0.188720718 | 153590.78 | 134148.62 | Down              | 0.087008308457971                                                    | Polyl(C)-binding protein 1 O5-Mus-musculus GN-Pcpb1 Pe1 SV-1                                                            |
| APP     | P12033-3 | 14 | 14 | 69653.36  | 76203.71  | 34532.36  | 59677.64  | 62827.57  | 62724.14  | 76363.2   | 37394.21  | 71931     | 16694.36    | 0.647833039 | 0.188523328 | 58958.526 | 52593.758 | Down              | 0.16236754095506                                                     | isoform 1 of Amyloid beta A4 precursor protein O5-Mus-musculus GN-Ap                                                    |
| FNBP1   | Q8BV70-5 | 3  | 3  | 47468.67  | 64565.33  | 57909.33  | 58191.33  | 50334.67  | 65031.33  | 64505.67  | 64101     | 20483.67  | 0.648089395 | 0.188366684 | 59589.866   | 51490.468 | Down      | 0.115180421636188 | isoform 5 of Formin-binding protein 1 O5-Mus-musculus GN-Fnbp1       |                                                                                                                         |
| NAV1    | Q8BCV7-2 | 11 | 11 | 76333.5   | 177204.4  | 12565.7   | 19977.7   | 19977.7   | 22508.4   | 19376     | 22508.4   | 48770.9   | 3153        | 0.648734534 | 0.18793238  | 17210.16  | 145950.96 | Down              | 0.20302382720074                                                     | isoform 2 of Neuron navigator 1 O5-Mus-musculus GN-Nav1                                                                 |
| CRP2    | Q8C17C   | 25 | 25 | 7937.68   | 64876.7   | 67403.8   | 58974.72  | 76885.84  | 65753.6   | 75138     | 63585.12  | 83479.8   | N/A         | 0.649022147 | 0.187540971 | 69944.68  | 72352.52  | Down              | 0.05740482846077                                                     | Cytosine-rich kinase 2 O5-Mus-musculus GN-Crp2 Pe1 SV-1                                                                 |
| RAI1    | Q6D874   | 2  | 2  | 17414     | 14516     | 71957     | 90        | 71957     | 90        | 71957     | 90        | 71957     | N/A         | 0.649286332 | 0.187438164 | 71957     | 10984.4   | Down              | 0.2743701986434                                                      | isoform 2 of Neuron navigator 1 O5-Mus-musculus GN-Rai1 Pe2 SV-1                                                        |
| MMP151  | Q9CQE3   | 1  | 1  | 75033     | 59452     | 79443     | 28590     | 60705     | 47984     | 54989     | 89122     | 76262     | N/A         | 0.649732955 | 0.187655105 | 60845.6   | 66865.75  | Down              | 0.140090809464123                                                    | 28S ribosomal protein S17, mitochondrial O5-Mus-musculus GN-Mmp151 Pe2 SV-1                                             |
| KCNAB2  | P62482   | 3  | 3  | 17923.67  | 13009     | 30949.67  | 23369.67  | 28874.33  | 29773     | 25738.67  | 17199.67  | 24106     | 24878.67    | 0.650047865 | 0.186457395 | 22624.26  | 24699.202 | Down              | 0.113821631739063                                                    | Voltage-gated potassium channel subunit beta-2 O5-Mus-musculus GN-Kcnab2 Pe2 SV-1                                       |
| AUH1    | Q8V213-2 | 2  | 2  | 162394.5  | 13117.5   | 70981.5   | 169848    | 153625.5  | 174495    | 15273.5   | 95181.5   | 151176    | 63177       | 0.651184261 | 0.186296105 | 137025    | 124253.4  | Down              | 0.147247561177448                                                    | isoform 3 of Methylglutathione CoA hydratase, mitochondrial O5-Mus-musculus GN-Auh1                                     |
| SNCA    | Q55042-2 | 39 | 39 | 120569.82 | 106685.21 | 100311.23 | 165937.93 | 104895.23 | 133340.49 | 116473.14 | 113352.62 | 132351.41 | 52177       | 0.65120075  | 0.186044604 | 119629.85 | 113397.27 | Down              | 0.127248913204931                                                    | isoform 2 of Alpha-synuclein O5-Mus-musculus GN-Snca                                                                    |
| VAMP1   | Q62442   | 1  | 1  | 11886     | 15905     | N/A       | 50372     | 29426     | 40253     | 36165     | N/A       | 19276     | N/A         | 0.651490958 | 0.185955488 | 26897.25  | 32097.333 | Down              | 0.254994764482302                                                    | Vesicle-associated membrane protein 1 O5-Mus-musculus GN-Vamp1 Pe1 SV-1                                                 |
| OMG     | Q63912   | 4  | 4  | 62599.75  | 77120     | 39192.5   | 136644.25 | 78608.75  | 108477.25 | 116751.5  | 76862.75  | 87395.25  | 60224.25    | 0.651697619 | 0.185120564 | 79321.05  | 88196.4   | Down              | 0.152799618280909                                                    | Glycylglycyl-L-methylglycine synthase O5-Mus-musculus GN-Omg Pe1 SV-1                                                   |
| RAI2    | Q6D872   | 1  | 1  | 20024.24  | 1337.36   | 108423    | 6001      | 15605     | 15605     | 15605     | 58120     | 131101    | 191769      | 0.651697619 | 0.185120564 | 79321.05  | 88196.4   | Down              | 0.152799618280909                                                    | RAI2-binding protein RAI2 O5-Mus-musculus GN-Rai2 Pe1 SV-1                                                              |
| PRKR4   | Q9W7K2   | 1  | 1  | 16781     | 22214     | 11248     | 44000     | 13871     | 25946     | 32390     | N/A       | 17024     | N/A         | 0.652397038 | 0.185487893 | 21622.8   | 25120     | Down              | 0.212683110233904                                                    | interferon-inducible double-stranded RNA-dependent protein kinase activator A O5-Mus-musculus GN-Prkr4 Pe1 SV-1         |
| PSAT1   | Q9N985   | 3  | 3  | 126839.33 | 143779    | 140983    | 138614.67 | 156623.33 | 183787.67 | 143278.67 | 135699.33 | 184596.33 | 130167.87   | 0.652397038 | 0.185487893 | 21622.8   | 25120     | Down              | 0.0653476804635                                                      | Phosphoserine aminotransferase O5-Mus-musculus GN-Psat1 Pe1 SV-1                                                        |
| ARHGFR6 | Q8K43    | 1  | 1  | 66607     | 91160     | 42121     | 226707    | 94487     | 134623    | 64350     | 41790     | 75750     | N/A         | 0.653446634 |             |           |           |                   |                                                                      |                                                                                                                         |

|          |          |     |     |           |           |           |           |           |           |           |           |           |             |             |             |             |           |        |                                                                                                 |                                                                                                       |
|----------|----------|-----|-----|-----------|-----------|-----------|-----------|-----------|-----------|-----------|-----------|-----------|-------------|-------------|-------------|-------------|-----------|--------|-------------------------------------------------------------------------------------------------|-------------------------------------------------------------------------------------------------------|
| TM6B4X   | P20065   | 1   | 1   | 95211     | 96294     | 155594    | 57064     | 74947     | 50887     | 61275     | 120655    | 77916     | 115383      | 67001915    | 0.173912759 | 950821.4    | 86643.1   | Down   | Thymosin beta-4 O5-Mus-musculus GN-Tmbb4 Pe1 Sv-1                                               |                                                                                                       |
| KY1A73   | Q71819   | 2   | 1   | 2         | 992       | NA        | 5160      | 17471     | 3693      | 2639      | NA        | NA        | NA          | 0.670240012 | 0.173799649 | 2474.3333   | 8163.1    | Down   | Hydroxy-methylglutaryl-CoA lyase O5-Mus-musculus GN-Cml2 Pe1 Sv-1                               |                                                                                                       |
| MYD11    | Q24391   | 1   | 1   | 9456      | 13933     | 9537      | 3296      | 21447     | 22286     | 2454      | 22386     | NA        | NA          | 0.670240012 | 0.173799649 | 2474.3333   | 8163.1    | Down   | Hydroxy-methylglutaryl-CoA lyase O5-Mus-musculus GN-Cml2 Pe1 Sv-1                               |                                                                                                       |
| PTPC2    | Q19105   | 7   | 7   | 17096     | 29258.14  | 6513.86   | 43688.57  | 32732.43  | 39358.63  | 52499.24  | 4043      | 32360.71  | NA          | 0.173799649 | 0.173799649 | 2474.3333   | 8163.1    | Down   | Hydroxy-methylglutaryl-CoA lyase O5-Mus-musculus GN-Cml2 Pe1 Sv-1                               |                                                                                                       |
| CPME6    | Q92140   | 20  | 20  | 14159.45  | 17937.8   | 13314.8   | 18895.95  | 22103.8   | 22825.9   | 26915.6   | 21242.9   | 16395.1   | 0.671246471 | 0.173799649 | 0.173799649 | 2474.3333   | 8163.1    | Down   | Gonin-6 O5-Mus-musculus GN-Cem6 Pe2 Sv-1                                                        |                                                                                                       |
| GFR      | P56213   | 4   | 4   | 33489.75  | 36313.25  | 39398.25  | 45764.5   | 53121.5   | 58272.75  | 40112.5   | NA        | 44245.75  | NA          | 0.671246471 | 0.173799649 | 0.173799649 | 2474.3333 | 8163.1 | Down                                                                                            | FAD-linked sulfhydryl oxidase ALR O5-Mus-musculus GN-Gfr Pe1 Sv-1                                     |
| SEPHN22  | Q07235   | 1   | 1   | 45793     | 6161      | 40239     | 65647     | 41247.5   | 45793     | 45793     | 45793     | 45793     | 45793       | 0.173799649 | 0.173799649 | 0.173799649 | 2474.3333 | 8163.1 | Down                                                                                            | Glycine-derived amino acid O5-Mus-musculus GN-Grh2 Pe2 Sv-1                                           |
| ARHAPG17 | Q33453   | 1   | 1   | 851       | 3617      | NA        | 804       | 2489      | NA        | NA        | 11118     | NA        | NA          | 0.671246471 | 0.173799649 | 0.173799649 | 2474.3333 | 8163.1 | Down                                                                                            | Hydroxy-methylglutaryl-CoA lyase O5-Mus-musculus GN-Arhap17                                           |
| CRIC1    | Q68107   | 6   | 6   | 67171.67  | 65201.5   | 56109.5   | 50864.83  | 64875.83  | 66371.67  | 65327.33  | 58571.33  | 92391.83  | 41326.33    | 0.671246471 | 0.173799649 | 0.173799649 | 2474.3333 | 8163.1 | Down                                                                                            | CREB-regulated transcription coactivator 1 O5-Mus-musculus GN-Cric1 Pe2 Sv-1                          |
| POIR2F   | P61219   | 1   | 1   | 4425      | 1093      | 3595      | 884       | 2377      | 2322      | 1018      | NA        | 2320      | 7201        | 0.671246471 | 0.173799649 | 0.173799649 | 2474.3333 | 8163.1 | Down                                                                                            | DNA-directed RNA polymerase I, $\beta$ and II subunit RPARC2 O5-Mus-musculus GN-Polr2f Pe2 Sv-1       |
| G64E47-3 | P64847-3 | 2   | 2   | 5105.5    | 7205      | 1173.5    | 15974     | 10999     | 11988.5   | 11369     | 58183     | 7588.3    | NA          | 0.671246471 | 0.173799649 | 0.173799649 | 2474.3333 | 8163.1 | Down                                                                                            | Form of Receptor-type tyrosine-protein phosphatase beta O5-Mus-musculus GN-Ptpn2                      |
| GNV95    | Q40639   | 6   | 6   | 19300.5   | 21133.67  | 9801.17   | 19976.37  | 21597.17  | 22231.83  | 2258      | 14399.37  | 18213     | 18414       | 0.173799649 | 0.173799649 | 0.173799649 | 2474.3333 | 8163.1 | Down                                                                                            | Protein phosphatase PTC2 homolog O5-Mus-musculus GN-Ptpc2 Pe1 Sv-1                                    |
| GATC     | Q8C870   | 2   | 2   | 58772     | 62794     | 57707.5   | 51309     | 58299     | 47198.5   | 53303.5   | 55475.5   | 62322     | 0.173799649 | 0.173799649 | 0.173799649 | 2474.3333   | 8163.1    | Down   | Glutamyl-tRNA(Gln) amidotransferase subunit C, mitochondrial O5-Mus-musculus GN-Gnat3c Pe2 Sv-1 |                                                                                                       |
| RAB21    | P35282   | 1   | 1   | 9998      | 31678.4   | NA        | 51815     | 29562     | 28106     | 34991     | NA        | 15368     | NA          | 0.671246471 | 0.173799649 | 0.173799649 | 2474.3333 | 8163.1 | Down                                                                                            | Ras-related protein Rab-21 O5-Mus-musculus GN-Rab21 Pe1 Sv-1                                          |
| PM2A2    | FA9722   | 5   | 5   | 66028.8   | 62678.4   | 70521.8   | 99014.4   | 46047.2   | 73885.8   | 59876.6   | 89564.4   | 44548.4   | 27136       | 0.671246471 | 0.173799649 | 0.173799649 | 2474.3333 | 8163.1 | Down                                                                                            | Proteasome subunit alpha type 2 O5-Mus-musculus GN-Pma2 Pe1 Sv-1                                      |
| ACTH1    | Q27294   | 34  | 34  | 11692.83  | 14923.2   | 11634.77  | 40915     | 19951.87  | 36469.07  | 28015.5   | 9661.27   | 18933.53  | 8646.47     | 0.173799649 | 0.173799649 | 0.173799649 | 2474.3333 | 8163.1 | Down                                                                                            | Alpha-actinin-1 O5-Mus-musculus GN-Acth1 Pe1 Sv-1                                                     |
| OLM1     | Q80988   | 6   | 6   | 25999     | 23659.83  | 19027.67  | 23505     | 21858.5   | 24497.67  | 21963.5   | 26207.5   | 25155.17  | 9007.83     | 0.671246471 | 0.173799649 | 0.173799649 | 2474.3333 | 8163.1 | Down                                                                                            | Noelin O5-Mus-musculus GN-Olm1 Pe1 Sv-1                                                               |
| RIMBP2   | Q8U040   | 11  | 11  | 12890.6   | 13438.2   | 11747.4   | 13994.9   | 13732.8   | 15464.1   | 15134.5   | 4542.9    | 19038.1   | 5067.8      | 0.671246471 | 0.173799649 | 0.173799649 | 2474.3333 | 8163.1 | Down                                                                                            | RIMS-binding protein 2 O5-Mus-musculus GN-Rimb2 Pe1 Sv-1                                              |
| FIN      | P36868   | 2   | 2   | 21877.5   | 39429     | 38976.5   | 25225     | 31742     | 29723     | 33857     | 34099     | 36355.5   | 43004       | 0.671246471 | 0.173799649 | 0.173799649 | 2474.3333 | 8163.1 | Down                                                                                            | Form of Receptor-type tyrosine-protein phosphatase beta O5-Mus-musculus GN-Ptpn2                      |
| HNRNP40  | Q5C066   | 4   | 4   | 50555.25  | 32429.5   | 50186     | 16684.25  | 32197     | 20082.25  | 32012.25  | 35472.75  | 40933     | 75447.25    | 0.671246471 | 0.173799649 | 0.173799649 | 2474.3333 | 8163.1 | Down                                                                                            | Heterogeneous nuclear ribonucleoprotein A0 O5-Mus-musculus GN-Hnnp40 Pe1 Sv-1                         |
| BRK1     | Q5R105   | 9   | 9   | 39675.89  | 51888.89  | 48406.22  | 41454.33  | 50071.89  | 53989.11  | 63076     | 23218.56  | 70701.67  | 40120.56    | 0.671246471 | 0.173799649 | 0.173799649 | 2474.3333 | 8163.1 | Down                                                                                            | Serine/threonine-protein kinase BRK1 O5-Mus-musculus GN-Brk1 Pe1 Sv-1                                 |
| SHG1     | Q62419   | 17  | 17  | 105959.5  | 115504.94 | 128723.81 | 77694.25  | 122718.75 | 98431.06  | 101321.69 | 102192.25 | 128103.25 | 675892.84   | 0.173799649 | 0.173799649 | 0.173799649 | 2474.3333 | 8163.1 | Down                                                                                            | Endophilin-A2 O5-Mus-musculus GN-Shg1 Pe1 Sv-1                                                        |
| RTH3     | Q5E97-4  | 1   | 1   | 11600     | 15827     | 7234      | 32320     | 12079     | 23217     | 10218     | NA        | 17018     | NA          | 0.671246471 | 0.173799649 | 0.173799649 | 2474.3333 | 8163.1 | Down                                                                                            | Form of Receptor-type tyrosine-protein phosphatase beta O5-Mus-musculus GN-Ptpn2                      |
| IP16     | P41711   | 14  | 14  | 131609.21 | 156740.86 | 187644.64 | 13952.64  | 131111.93 | 145841.64 | 157366.14 | 184846.14 | 191688.79 | 110741.79   | 0.173799649 | 0.173799649 | 0.173799649 | 2474.3333 | 8163.1 | Down                                                                                            | 60S ribosomal protein L6 O5-Mus-musculus GN-Ip16 Pe1 Sv-1                                             |
| DNM1L    | Q8C1M6-4 | 14  | 14  | 18551.77  | 24580.77  | 23215.54  | 44008.23  | 26319.92  | 31342.92  | 32036.46  | 20203     | 22475.37  | 37615       | 0.671246471 | 0.173799649 | 0.173799649 | 2474.3333 | 8163.1 | Down                                                                                            | Form of Dynamin-1-like protein O5-Mus-musculus GN-Dnm1l                                               |
| NRCAM    | Q8U04-3  | 27  | 27  | 15125.19  | 18959.11  | 53515.59  | 57358.78  | 57451.33  | 67988.33  | 60919.04  | 62816.78  | 26344.19  | 0.671246471 | 0.173799649 | 0.173799649 | 2474.3333   | 8163.1    | Down   | Form of Neuronal cell adhesion molecule O5-Mus-musculus GN-Nrcam                                |                                                                                                       |
| MIRP16   | Q5C7C7   | 1   | 1   | 49366     | 47899     | 55609     | 26162     | 41787     | 31393     | 40083     | 51297     | 37153     | 81320       | 0.671246471 | 0.173799649 | 0.173799649 | 2474.3333 | 8163.1 | Down                                                                                            | 28S ribosomal protein S16, mitochondrial O5-Mus-musculus GN-Mrsp16 Pe2 Sv-1                           |
| STAR     | Q80883   | 3   | 3   | 7179      | 8750      | 1503.5    | 5494      | 3460.5    | 4805.5    | 15665.5   | 2186.5    | 54        | 292.8       | 0.671246471 | 0.173799649 | 0.173799649 | 2474.3333 | 8163.1 | Down                                                                                            | Synrinin O5-Mus-musculus GN-Star Pe1 Sv-1                                                             |
| OLM3     | Q8C12-2  | 5   | 5   | 8012.25   | 8959.25   | 7420.17   | 11195.27  | 7325.14   | 10183.5   | 18682.89  | 19675.39  | 8699      | 1585.95     | 0.671246471 | 0.173799649 | 0.173799649 | 2474.3333 | 8163.1 | Down                                                                                            | Form of small ubiquitin-related modifier 3 O5-Mus-musculus GN-Sum3                                    |
| ADAP18P  | Q8K473   | 4   | 4   | 20955.75  | 25065     | 46891.25  | 13391     | 18953.75  | 24518.5   | 24223     | 42728.75  | 28985     | 16687.75    | 0.671246471 | 0.173799649 | 0.173799649 | 2474.3333 | 8163.1 | Down                                                                                            | NAD(P)+-hydride epimerase O5-Mus-musculus GN-Adap18p Pe1 Sv-1                                         |
| ANK2     | Q8C883   | 129 | 129 | 27813.39  | 38022.64  | 30864.71  | 61120.19  | 44767.01  | 51330.42  | 60105.98  | 27367.89  | 46946.4   | 36278.3     | 0.671246471 | 0.173799649 | 0.173799649 | 2474.3333 | 8163.1 | Down                                                                                            | Ankyrin-2 O5-Mus-musculus GN-Ank2 Pe1 Sv-1                                                            |
| FMF110B  | Q8C739   | 1   | 1   | 4205      | 1008      | 986       | 5375      | 2600      | 5255      | 703       | NA        | 7932      | NA          | 0.671246471 | 0.173799649 | 0.173799649 | 2474.3333 | 8163.1 | Down                                                                                            | Protein FMF110B O5-Mus-musculus GN-Fmf110b Pe1 Sv-1                                                   |
| CALM2    | Q80818-4 | 4   | 4   | 51867.5   | 7333.25   | 47309.5   | 26403     | 52375     | 50176.25  | 54597.25  | 37648.5   | 57924     | 47837.5     | 0.671246471 | 0.173799649 | 0.173799649 | 2474.3333 | 8163.1 | Down                                                                                            | Form of Voltage-dependent L-type calcium channel subunit beta-1 O5-Mus-musculus GN-Calm2              |
| CLIC1    | Q92105   | 1   | 1   | NA        | NA        | 57318     | 3399      | 744       | 1228      | 997       | NA        | 1370      | NA          | 0.671246471 | 0.173799649 | 0.173799649 | 2474.3333 | 8163.1 | Down                                                                                            | Chloride intracellular channel protein 1 O5-Mus-musculus GN-Clc1 Pe1 Sv-1                             |
| TMOMM22  | Q8C9D3   | 2   | 2   | NA        | NA        | NA        | 2479      | 407       | 744       | 978       | NA        | NA        | NA          | 0.671246471 | 0.173799649 | 0.173799649 | 2474.3333 | 8163.1 | Down                                                                                            | Electron transport receptor subunit TMOM22 homolog O5-Mus-musculus GN-Tmom22 Pe2 Sv-1                 |
| ETOH2    | Q2167-4  | 4   | 4   | 11310.25  | 15319.5   | 2878      | 25008     | 13899.5   | 23160     | 14073     | 8238      | 17272     | NA          | 0.671246471 | 0.173799649 | 0.173799649 | 2474.3333 | 8163.1 | Down                                                                                            | Alcohol transfer flavonoid-ubiquitin endoribonuclease, mitochondrial O5-Mus-musculus GN-Eth2 Pe1 Sv-1 |
| GNM48-P3 | Q2167-3  | 19  | 19  | 131609.21 | 156740.86 | 187644.64 | 13952.64  | 131111.93 | 145841.64 | 157366.14 | 184846.14 | 191688.79 | 110741.79   | 0.173799649 | 0.173799649 | 0.173799649 | 2474.3333 | 8163.1 | Down                                                                                            | 60S ribosomal protein L6 O5-Mus-musculus GN-Ip16 Pe1 Sv-1                                             |
| HDOC2    | Q35033   | 1   | 1   | 53592     | 87529     | 47793     | 72578     | 69652     | 76894     | 61186     | 61186     | 68032     | NA          | 0.671246471 | 0.173799649 | 0.173799649 | 2474.3333 | 8163.1 | Down                                                                                            | HD domain-containing protein 2 O5-Mus-musculus GN-Hdoc2 Pe2 Sv-1                                      |
| ITPKA    | Q80871   | 16  | 16  | 8112.38   | 7119.46   | 4999.38   | 7878.46   | 7962.92   | 9070.69   | 9505.15   | 2760.69   | 10086.31  | 8518.62     | 0.671246471 | 0.173799649 | 0.173799649 | 2474.3333 | 8163.1 | Down                                                                                            | Inositol-trisphosphate 3-kinase A O5-Mus-musculus GN-Itpka Pe2 Sv-1                                   |
| MARK4    | Q919P0   | 1   | 1   | NA        | NA        | 5256      | NA        | 2373      | 2475      | 2016      | NA        | 2058      | NA          | 0.671246471 | 0.173799649 | 0.173799649 | 2474.3333 | 8163.1 | Down                                                                                            | Form of Receptor-type tyrosine-protein phosphatase beta O5-Mus-musculus GN-Ptpn2                      |
| DLD      | P21671   | 24  | 24  | 61055     | 58248.3   | 61636.38  | 63022.44  | 56973.25  | 56973.25  | 67266.42  | 67266.42  | 67266.42  | 67266.42    | 0.671246471 | 0.173799649 | 0.173799649 | 2474.3333 | 8163.1 | Down                                                                                            | Dihydrodipicolinate decarboxylase, mitochondrial O5-Mus-musculus GN-Dld Pe1 Sv-1                      |
| OLM2     | Q8U04-2  | 42  | 42  | 15004.71  | 150664.66 | 181062.39 | 147211.02 | 147211.02 | 147211.02 | 147211.02 | 147211.02 | 147211.02 | 147211.02   | 0.671246471 | 0.173799649 | 0.173799649 | 2474.3333 | 8163.1 | Down                                                                                            | Dihydrodipicolinate decarboxylase, mitochondrial O5-Mus-musculus GN-Dld Pe1 Sv-1                      |
| OLM14-3  | Q8U04-3  | 5   | 5   | 42512.4   | 47980.8   | 53157.6   | 58330.2   | 38116.6   | 61641.6   | 50966.4   | 65700.8   | 59088.2   | 21425.8     | 0.671246471 | 0.173799649 | 0.173799649 | 2474.3333 | 8163.1 | Down                                                                                            | Form of 3-Thiouridine reductase 2, mitochondrial O5-Mus-musculus GN-Tnmr2                             |
| TMN605   | Q4V4E3   | 1   | 1   | 8638      | 25071     | NA        | 59628     | 20345     | 44904     | 44209     | NA        | 12475     | NA          | 0.671246471 | 0.173799649 | 0.173799649 | 2474.3333 | 8163.1 | Down                                                                                            | Transmembrane protein 65 O5-Mus-musculus GN-Tmn605 Pe1 Sv-1                                           |
| ETC      | Q8U04-3  | 8   | 8   | 131609.21 | 156740.86 | 187644.64 | 13952.64  | 131111.93 | 145841.64 | 157366.14 | 184846.14 | 191688.79 | 110741.79   | 0.173799649 | 0.173799649 | 0.173799649 | 2474.3333 | 8163.1 | Down                                                                                            | Form of 3-Thiouridine reductase 2, mitochondrial O5-Mus-musculus GN-Tnmr2                             |
| NKX2     | Q8U04-3  | 8   | 8   | 12400     | 10805.14  | 7784.71   | 13394.57  | 13513.29  | 13526     | 11503.86  | 6967.43   | 16110.71  | 4951.57     | 0.671246471 | 0.173799649 | 0.173799649 | 2474.3333 | 8163.1 | Down                                                                                            | Form of 3-Thiouridine reductase 2, mitochondrial O5-Mus-musculus GN-Tnmr2                             |
| FARSA    | Q8C0C7   | 5   | 5   | 9317.8    | 11297.6   | 4045.2    | 24263.8   | 8670.8    | 15650     | 10740     | 3460      | 8968.2    | 11483.04    | 0.671246471 | 0.173799649 | 0.173799649 | 2474.3333 | 8163.1 | Down                                                                                            | Phenylalanine-tRNA ligase alpha subunit O5-Mus-musculus GN-Farsa Pe2 Sv-1                             |
| VAT1L    | Q80878   | 3   | 3   | 25207.33  | 35357.67  | 13846     | 108839    | 45366.67  | 66547     | 62775.67  | 7132      | 30978.67  | 5954.33     | 0.671246471 | 0.173799649 | 0.173799649 | 2474.3333 | 8163.1 | Down                                                                                            | Synaptic vesicle membrane protein VAT1L homolog O5-Mus-musculus GN-Vat1l Pe2 Sv-1                     |
| MRP42    | Q40642   | 19  | 19  | 45845.1   | 42949.75  | 52486.25  | 42949.75  | 42949.7   |           |           |           |           |             |             |             |             |           |        |                                                                                                 |                                                                                                       |

|         |          |    |    |           |           |           |           |           |           |           |           |           |             |             |             |             |           |                   |                                                                  |                                                                                                                |                                                                 |
|---------|----------|----|----|-----------|-----------|-----------|-----------|-----------|-----------|-----------|-----------|-----------|-------------|-------------|-------------|-------------|-----------|-------------------|------------------------------------------------------------------|----------------------------------------------------------------------------------------------------------------|-----------------------------------------------------------------|
| CACNB3  | P54285   | 8  | 3  | 25028     | 27654.12  | 13748.88  | 20203.88  | 25180.5   | 22731.5   | 26120.62  | 27373.5   | 21123.5   | 5250.25     | 0.709188925 | 0.149238055 | 22363.076   | 2057.874  | Down              | 0.122831794616484                                                | Voltage-dependent L-type calcium channel subunit beta-3 OS-Mus musculus GN-Cacnb3 PE-2 SV-2                    |                                                                 |
| KBTBD11 | Q84W99   | 3  | 3  | 15407     | 26522     | 22705     | 17907     | 14497     | 16964     | 16180.5   | 27387     | 2251.5    | 19407.6     | 0.709235978 | 0.14919882  | 27064.76    | 20780.75  | Down              | 0.092736842003164                                                | Fields repeat and BTB domain-containing protein 11 OS-Mus musculus GN-Kbtbd11 PE-1 SV-3                        |                                                                 |
| GLI3    | Q8H345   | 6  | 16 | 14590.05  | 23993.56  | 16995.18  | 59892.55  | 23399.02  | 41530.31  | 39313.25  | 26935.56  | 20651.19  | 21116.15    | 0.170105718 | 0.148425228 | 27004.136   | 3109.286  | Down              | 0.172456147458177                                                | Gli3, apparatus protein OS-Mus musculus GN-Gli3 PE-1 SV-3                                                      |                                                                 |
| GNP157  | Q8C0J8   | 1  | 2  | 2916      | 6106      | 14072     | 14063.5   | 11195     | 11877.5   | NA        | NA        | 11688     | 14880       | 0.148802186 | 0.148802186 | 4058.7      | 8397.333  | Down              | 0.332653067060003                                                | Galectin-6-induced differentiation-associated protein 1 OS-Mus musculus GN-Gnp157 PE-1 SV-1                    |                                                                 |
| RG52    | Q8CEG9   | 4  | 9  | 19323.75  | 25718.38  | 22067.12  | 21355.12  | 28181.82  | 29688.5   | 25830.62  | 18160.5   | 26595.5   | 21283.38    | 0.710611799 | 0.146857592 | 23312.898   | 24313.5   | Down              | 0.060629231155925                                                | Regulator of G-protein signaling 12 OS-Mus musculus GN-Rg52 PE-1 SV-2                                          |                                                                 |
| FAM88B  | Q8BV01   | 4  | 4  | 13607     | 18331.75  | 22117     | 31107.5   | 20537.25  | 34555.5   | 23634.75  | 3382.5    | 35887.25  | NA          | 0.711340547 | 0.147922436 | 21440.24    | 24340     | Down              | 0.20314696667314                                                 | Protein FAM88B OS-Mus musculus GN-Fam88b PE-2 SV-1                                                             |                                                                 |
| GNH48B  | Q8B9V8   | 1  | 1  | 50496.8   | 12870     | 7794      | 7699      | 7794      | 7794      | 7794      | 7794      | 7794      | 7794        | 0.147406786 | 0.147406786 | 12870       | 7699      | Down              | 0.153093537020001                                                | WD repeat-containing protein 44 OS-Mus musculus GN-Gnh48b PE-1 SV-1                                            |                                                                 |
| FAM138B | Q7U160   | 12 | 12 | 11508.64  | 12030.09  | 9011.82   | 16013.36  | 13777.5   | 14572.72  | 17595.2   | 10632.36  | 16359.5   | 8617.55     | 0.722029098 | 0.147463163 | 12162.29    | 13703.4   | Down              | 0.082723024461094                                                | Protein FAM138B OS-Mus musculus GN-Fam131b PE-1 SV-1                                                           |                                                                 |
| C10C    | Q02105   | 1  | 1  | NA        | 8895      | NA        | 4289      | 1531      | 4949      | 2231      | NA        | NA        | NA          | 0.712007055 | 0.14746081  | 2906.133    | 3591.5    | Down              | 0.30538637450643                                                 | Complement C1a subcomponent subunit C OS-Mus musculus GN-C1ac PE-2 SV-2                                        |                                                                 |
| UCP11   | Q8CEG3   | 2  | 2  | 5165      | 5805.5    | 4143      | 7823      | 7083.5    | 6970      | 7102      | 4051.5    | NA        | 0.712321291 | 0.147129623 | 6004        | 6401        | Down      | 0.092713731645886 | Deubiquitinase protein VCP135 OS-Mus musculus GN-Ucp11 PE-1 SV-2 |                                                                                                                |                                                                 |
| ADNRH2  | Q8H072   | 2  | 2  | 1045.5    | 8239      | 5459.5    | 12984     | 7210      | 9011.5    | 6811      | 1489      | 8472      | NA          | 0.712355051 | 0.147439782 | 7548.6      | 6698.73   | Down              | 0.127807124892444                                                | Protein ADNRH2 OS-Mus musculus GN-Adnrh2 PE-1 SV-3                                                             |                                                                 |
| GNP157  | Q8C0J8   | 1  | 1  | 1121.88   | 9692.9    | 9693.9    | 13461     | 9989.1    | 12417.3   | 11049     | 3792      | 13075     | NA          | 0.712456004 | 0.147118208 | 9918.75     | 1001      | Down              | 0.1240615606781                                                  | Ribosomal protein G3, mitochondrial OS-Mus musculus GN-Gnp157 PE-2 SV-1                                        |                                                                 |
| NDUFB5  | Q9C9C3   | 2  | 2  | 43997     | 34884.5   | 65265.5   | 78851.5   | 49363.5   | 75012     | 60398     | 54202     | 39693.5   | NA          | 0.712700043 | 0.147700043 | 54464.5     | 48935.5   | Down              | 0.154007913684497                                                | NADH dehydrogenase (ubiquinone) 1 beta subcomplex subunit 5, mitochondrial OS-Mus musculus GN-Ndufb5 PE-1 SV-1 |                                                                 |
| NBEA    | Q8EFN1-4 | 3  | 3  | 2572.67   | 10511.67  | 5999.67   | 1027.67   | 5028.67   | 6904.33   | 6627.33   | 3141.67   | 6670.67   | 8291.33     | 0.713171511 | 0.146806014 | 5724.07     | 6327.066  | Down              | 0.14449532046854                                                 | Isomorph 4 of Neurobechin OS-Mus musculus GN-Nbea                                                              |                                                                 |
| SPTR    | P15308   | 5  | 5  | NA        | 2619.5    | 237.75    | 13104.5   | 5865.5    | 8876.5    | 5330.75   | 1079      | 1336.75   | NA          | 0.713477251 | 0.14661387  | 5456.8125   | 4150.75   | Down              | 0.39294960470888                                                 | Spectrin beta chain, erythrocytic OS-Mus musculus GN-Sptr PE-1 SV-4                                            |                                                                 |
| GNP157  | Q8C0J8   | 1  | 1  | 8782      | 8692.47   | 52385     | 8924      | 9364      | 8872.33   | 10303.67  | 11465.67  | 1302.67   | NA          | 0.146936504 | 0.146936504 | 9592.934    | 10551.89  | Down              | 0.081701129126787                                                | Major histocompatibility complex translocator, mitochondrial OS-Mus musculus GN-Mcat PE-1 SV-3                 |                                                                 |
| UCJA    | Q8D92A   | 8  | 8  | 22266.12  | 21595     | 23846.62  | 23011.75  | 23478.5   | 26887.5   | 23297.5   | 18570.25  | 29447.12  | 19895.25    | 0.714120328 | 0.146176367 | 22839.598   | 25937.524 | Down              | 0.0507618308659364                                               | Iron-sulfur cluster assembly 1 homolog, mitochondrial OS-Mus musculus GN-Ucja PE-2 SV-1                        |                                                                 |
| DUGAP3  | Q9D415-6 | 7  | 7  | 12304     | 13655.29  | 9762.71   | 12450.86  | 16877.57  | 12896.43  | 14607.64  | 5661.14   | 21561.57  | 3691.14     | 0.714320027 | 0.146099769 | 13100.086   | 11683.484 | Down              | 0.15515950478429                                                 | Isomorph 6 of Disks large-associated protein 1 OS-Mus musculus GN-Dlga1                                        |                                                                 |
| MAPA    | P27546-4 | 23 | 23 | 56031.26  | 52752.22  | 61254.87  | 67046.04  | 47744.17  | 59759.52  | 55018.04  | 66294.83  | 70887.57  | 45159       | 0.714522157 | 0.1459843   | 56565.712   | 59095.792 | Down              | 0.0523615910996259                                               | Isomorph 4 of Microtubule-associated protein 4 OS-Mus musculus GN-Mapa                                         |                                                                 |
| ARISA2  | Q02053   | 1  | 1  | 25658     | 27722     | 10942     | 40058     | 34700     | 27559     | 55279     | 20793     | 27126     | NA          | 0.145873733 | 0.145873733 | 27828       | 30214.25  | Down              | 0.11869190502478                                                 | ADP-ribosylation factor GTPase-activating protein 3 OS-Mus musculus GN-Arifa2 PE-1 SV-2                        |                                                                 |
| GRIN2A  | P93546   | 4  | 6  | 7064      | 10627.2   | 4211.4    | 23182.4   | 17273.8   | 21999.4   | 24668.4   | 6397.6    | 20342     | NA          | 0.145782914 | 0.145782914 | 12461.76    | 14577.44  | Down              | 0.22622954714004                                                 | Glutamate receptor ionotropic, NMDA 2A OS-Mus musculus GN-Grin2a PE-1 SV-2                                     |                                                                 |
| ETHE1   | Q8QCM0   | 8  | 8  | 30722.38  | 35775.12  | 19969.75  | 36025.75  | 31805.62  | 36804.5   | 31882.12  | 24511.25  | 34185.5   | 19151.88    | 0.715002061 | 0.145683191 | 30859.724   | 29028.25  | Down              | 0.0793492366494658                                               | Persulfide dioxygenase ETHE1 OS-Mus musculus GN-Ethe1 PE-1 SV-2                                                |                                                                 |
| SEPRIN1 | P19324   | 1  | 1  | 10779     | 15057     | 22024     | 13353     | 15109     | 18988     | 14471     | 11939     | 18413     | NA          | 0.145673388 | 0.145673388 | 12564.4     | 16207.75  | Down              | 0.086067818272551                                                | Serpin H1 OS-Mus musculus GN-Septin1 PE-1 SV-1                                                                 |                                                                 |
| GABR1   | Q8C710   | 1  | 1  | 2817      | 9057      | NA        | 3525      | 2674      | 9515      | 3233      | NA        | 2398      | NA          | 0.715641126 | 0.14513071  | 3018.25     | 3212      | Down              | 0.097597584398482                                                | Rib-binding protein 3 OS-Mus musculus GN-Gabr1 PE-1 SV-2                                                       |                                                                 |
| SYNGAP1 | P63E14   | 71 | 71 | 26180.17  | 33018.13  | 28855     | 44114.91  | 41720.39  | 51170.98  | 49642.51  | 28846.51  | 43310.06  | 20969.01    | 0.715207797 | 0.14519144  | 34777.72    | 37189.036 | Down              | 0.096713997652665                                                | Ras/Rap GTPase-activating protein SynGAP OS-Mus musculus GN-Syngap1 PE-1 SV-2                                  |                                                                 |
| CSMP1   | 1368826  | 38 | 38 | 168826.38 | 128526.62 | 123513.08 | 87365     | 157318.38 | 96084.85  | 127294.54 | 107847.92 | 11628.62  | NA          | 0.145107163 | 0.145107163 | 13103.89    | 20573.87  | Down              | 0.0816743234411327                                               | Cysteine and glycine-rich protein 1 OS-Mus musculus GN-Csmpl PE-1 SV-2                                         |                                                                 |
| APBB1   | Q8QJ01   | 2  | 2  | 5270.5    | 45003     | 3327.5    | 10850.5   | 8569      | 10729     | 6510.5    | NA        | 4863      | NA          | 0.712078268 | 0.144446883 | 6503.6      | 7166.167  | Down              | 0.179675511292905                                                | Amyloid beta A4 precursor protein-binding family B member 1 OS-Mus musculus GN-Apbb1 PE-1 SV-3                 |                                                                 |
| PSD     | Q02072   | 2  | 2  | 11487     | 18838     | NA        | 34397.5   | 14424     | 24472.5   | 25017.5   | NA        | 5545.5    | NA          | 0.71272681  | 0.144446883 | 19631.622   | 21863.1   | Down              | 0.16179899466143                                                 | Pin wnt SLC7 domain-containing protein 1 OS-Mus musculus GN-Psd PE-1 SV-2                                      |                                                                 |
| PGM3    | Q8C966   | 1  | 1  | 4331      | 8945      | NA        | 18751     | 6879      | 12317     | 13697     | 18751     | 18751     | NA          | 0.143758513 | 0.143758513 | 7272        | 11805.687 | Down              | 0.17863613407799                                                 | Phosphoglucomutase 3 OS-Mus musculus GN-Pgm3 PE-1 SV-1                                                         |                                                                 |
| OSBP1   | Q8H899   | 4  | 4  | 17100.25  | 23791.75  | 19773.75  | 22625     | 26598.5   | 28169     | 28613.75  | 13790.75  | 23182.75  | NA          | 0.719623156 | 0.142898471 | 21977.85    | 24349.061 | Down              | 0.0928646065162625                                               | Cytoskeletal-binding protein-related protein 6 OS-Mus musculus GN-Obp1 PE-2 SV-1                               |                                                                 |
| GRM2    | P23819-1 | 7  | 7  | 23721.14  | 35461.86  | 30046.14  | 51866.43  | 28270.71  | 44646.29  | 42617.21  | 32263.29  | 29549.43  | 34127.57    | 0.719378462 | 0.142755555 | 34647.256   | 37117.458 | Down              | 0.099356821406818                                                | Isomorph 3 of Glutamate receptor 2 OS-Mus musculus GN-Grm2                                                     |                                                                 |
| NDUFA5  | P18H05   | 8  | 8  | 29138.28  | 26386.12  | 26999.12  | 40917     | 33818.68  | 30335.88  | 29474.73  | 32286.88  | 32286.88  | 228         | 0.719619346 | 0.142755555 | 32286.88    | 32286.88  | Down              | 0.0917580104000000                                               | Nucleotide diphosphate kinase 1, mitochondrial OS-Mus musculus GN-Ndufa5 PE-1 SV-1                             |                                                                 |
| PCU1    | Q02087   | 20 | 20 | 92355.05  | 94625.05  | 74220.4   | 56611.24  | 77174.45  | 76065.55  | 83256.55  | 109200.05 | 62020.45  | NA          | 0.14236165  | 0.14236165  | 75080.84    | 69363.81  | Down              | 0.1142203408957597                                               | Protein-ubiquitin carboxyl-terminal isomerase Nucleosome-interacting 1 OS-Mus musculus GN-Pcu1 PE-1 SV-1       |                                                                 |
| UCU     | Q0D796   | 3  | 3  | 84313.67  | 83773     | 104720.67 | 59200     | 73804     | 82565     | 129506    | 88085     | 36081     | 73191.088   | 0.7191088   | 0.145116425 | 81166.402   | 83632     | Down              | 0.089513992056193                                                | Isomorph 4 of cytoskeleton-associated enzyme GUC1, mitochondrial OS-Mus musculus GN-Ucu PE-1 SV-1              |                                                                 |
| BABAM1  | Q3U413   | 2  | 2  | 23065     | 31057.5   | 37897.5   | 19892     | 33870.5   | 33261     | 30672     | 26458.5   | 31177.5   | 18045.5     | 0.722080212 | 0.141413474 | 29166.5     | 27358.7   | Down              | 0.081804423444039                                                | BRIC and BRCA1-A complex member 1 OS-Mus musculus GN-Babam1 PE-1 SV-2                                          |                                                                 |
| CTCF8   | Q8H399   | 2  | 2  | 22668     | 28854.5   | 4274      | 89253.5   | 20599     | 32219.5   | 22652.5   | 7960.5    | 17942     | NA          | 0.722102592 | 0.141400828 | 23044.4     | 20914.125 | Down              | 0.138651534736903                                                | Polysaccharide transferase 1 OS-Mus musculus GN-Ctcf8 PE-1 SV-2                                                |                                                                 |
| GNP157  | Q8C0J8   | 1  | 1  | 33417.95  | 33778.35  | 33778.35  | 33778.35  | 33778.35  | 33778.35  | 33778.35  | 33778.35  | 33778.35  | 33778.35    | 0.722102592 | 0.141400828 | 33778.35    | 33778.35  | Down              | 0.138651534736903                                                | Polysaccharide transferase 1 OS-Mus musculus GN-Gnp157 PE-1 SV-2                                               |                                                                 |
| UCAM1   | P29533   | 12 | 12 | 27707     | 34868.08  | 32211.17  | 35013.75  | 41591.5   | 47287.83  | 46712.25  | 22324.08  | 46130.25  | 21240       | 0.722735712 | 0.141024085 | 34273.8     | 36726.887 | Down              | 0.0995405858740771                                               | Vascular cell adhesion protein 1 OS-Mus musculus GN-Ucam1 PE-1 SV-1                                            |                                                                 |
| HINT2   | Q8D009   | 13 | 13 | 56426.92  | 52014.23  | 70870.62  | 41432.15  | 49180.15  | 43798.65  | 44520.62  | 74612.23  | 61388     | 59990.85    | 0.723245716 | 0.140715493 | 53984.814   | 56776.078 | Down              | 0.0727295611452314                                               | Histidine triad nucleotide-binding protein 2, mitochondrial OS-Mus musculus GN-Hint2 PE-1 SV-1                 |                                                                 |
| CRK1    | P47941   | 6  | 6  | 28282.67  | 28912.67  | 18894.83  | 29100.5   | 30989.67  | 38213.83  | 34258.67  | 22504.5   | 35358.67  | 12424.5     | 0.723417376 | 0.140613227 | 2727.488    | 29154.014 | Down              | 0.0982018915310941                                               | Crk-like protein OS-Mus musculus GN-Crk1 PE-1 SV-2                                                             |                                                                 |
| GNP157  | Q8C0J8   | 1  | 1  | 88025.67  | 105108.67 | 96002.67  | 100121.67 | 100121.67 | 100121.67 | 100121.67 | 100121.67 | 100121.67 | 100121.67   | 0.723417376 | 0.140613227 | 100121.67   | 100121.67 | Down              | 0.0982018915310941                                               | Crk-like protein OS-Mus musculus GN-Gnp157 PE-1 SV-2                                                           |                                                                 |
| CZD12   | Q8D800   | 28 | 28 | 11444.4   | 21514.74  | 13350.93  | 37477.76  | 24630.11  | 37207.44  | 331.23    | 16203.63  | 24480.37  | 8467.04     | 0.724298076 | 0.140613227 | 21514.74    | 24630.11  | Down              | 0.164349570897272                                                | C2 domain-containing protein 2-like OS-Mus musculus GN-Czd12 PE-1 SV-3                                         |                                                                 |
| FKBP4   | P30416   | 4  | 4  | 56831.5   | 79674.75  | 64660.75  | 66327.75  | 66327.75  | 66327.75  | 66327.75  | 66327.75  | 71828     | 86220.75    | 0.724524565 | 0.139913477 | 74111.95    | 71572.78  | Down              | 0.0503316970108294                                               | Protein type-A trans isomerase FKBP4 OS-Mus musculus GN-Fkbp4 PE-1 SV-2                                        |                                                                 |
| SNAP47  | Q8H570-2 | 1  | 1  | 5465      | 10071.71  | 6786      | 17156     | 8442      | 14761     | 10071.71  | 33027     | 3713      | 526         | NA          | 0.724524565 | 0.139913477 | 9662.2    | 9500              | Down                                                             | 0.186514862183809                                                                                              | Protein type-A trans isomerase SNAP47 OS-Mus musculus GN-Snap47 |
| PCU1    | Q0D796   | 3  | 3  | 28741.92  | 31227.88  | 23288.33  | 35456.42  | 36922.88  | 36922.88  | 36922.88  | 20391.17  | 5376.5    | 11238.83    | 0.725678931 | 0.139254586 | 3078.148    | 3314.41   | Down              | 0.10847627744541                                                 | Rib-binding protein 3 OS-Mus musculus GN-Pcu1 PE-1 SV-2                                                        |                                                                 |
| RAB10   | P61027   | 1  | 1  | 2122      | 13774     | NA        | 37783     | 14777     | 23889     | 16558     | NA        | 10395     | NA          | 0.725678931 | 0.139254586 | 17136.5     | 20773.5   | Down              | 0.24252659535577                                                 | Ras-related protein Rab-10 OS-Mus musculus GN-Rab10 PE-1 SV-1                                                  |                                                                 |
| GAB1    | Q8QV01   | 1  | 1  | 8368      | 10759     | 58337     | 8004      | 4829      | 7847      | NA        | 10395     | NA        | 0.727365719 | 0.139180775 | 84312       | 7723.667    | Down      | 0.126794266825412 | GAB                                                              |                                                                                                                |                                                                 |

|               |           |    |    |           |           |           |           |           |           |           |           |           |             |             |             |             |            |                  |                                                               |                                                                                                            |                                                                        |
|---------------|-----------|----|----|-----------|-----------|-----------|-----------|-----------|-----------|-----------|-----------|-----------|-------------|-------------|-------------|-------------|------------|------------------|---------------------------------------------------------------|------------------------------------------------------------------------------------------------------------|------------------------------------------------------------------------|
| RP1L5         | Q0C2M2    | 5  | 5  | 103890.8  | 139961    | 135253.4  | 160505.4  | 120020.4  | 147812.4  | 134030.8  | 167640.2  | 120398.4  | 57470.7     | 147103.64   | 0.129951248 | 123826.12   | 124542.4   | Down             | 0.0825074181338383                                            | 60S ribosomal protein L15 OS-Mus musculus GN-RpL15 PE-2 Sv-4                                               |                                                                        |
| EMCR          | Q07878    | 4  | 4  | 38823.75  | 45729.25  | 4238.75   | 76999.75  | 46984.5   | 55613.5   | 38299.5   | 34488     | 53355.75  | 0.741039642 | 17992.47    | 0.741039642 | 49962.5     | 46941.45   | Down             | 0.075843132535545                                             | ER membrane protein complex subunit 8 OS-Mus musculus GN-EmCR PE-1 Sv-1                                    |                                                                        |
| GLD3          | Q0CQMS    | 2  | 2  | 189632    | 206698    | 10477     | 202427    | 251794    | 233657    | 252847    | 100408    | 183434    | 188939      | 0.741021079 | 0.741021079 | 202435.8    | 191897     | Down             | 0.077123299230294                                             | Glu-taraldehyde 3 OS-Mus musculus GN-Gld3 PE-1 Sv-1                                                        |                                                                        |
| GRB5          | Q0P81     | 4  | 4  | 137651    | 16919     | 10475     | 25330.75  | 14150.75  | 23861.25  | 17476.25  | 105008    | 17476.25  | 0.12506889  | 0.12506889  | 0.12506889  | 16115.3     | 17890.875  | Down             | 0.108989746715563                                             | Guanine nucleotide-binding domain subunit beta-5 OS-Mus musculus GN-Grb5 PE-1 Sv-1                         |                                                                        |
| PRMT2         | EPRLU5    | 5  | 5  | 2781.3    | 5063.6    | 2734      | 54031.6   | 9231      | 24691     | 21695.8   | 3260.8    | 3655      | 5900.2      | 0.742032816 | 0.742032816 | 15567.08    | 15846.56   | Down             | 0.394761040881734                                             | Proline-rich transmembrane protein 2 OS-Mus musculus GN-Prmt2 PE-1 Sv-1                                    |                                                                        |
| GNAL          | Q0CQCT    | 1  | 1  | 246457    | 333187    | 230628    | 564481    | 351506    | 486117    | 595600    | 361891    | 309723    | 140600      | 0.742176168 | 0.742176168 | 342591.8    | 378896.1   | Down             | 0.13324471241405                                              | Guanine nucleotide-binding protein (Gq) subunit alpha OS-Mus musculus GN-Gnal PE-1 Sv-1                    |                                                                        |
| RAI1          | Q0CQ79    | 1  | 1  | 126573    | 139573    | 34228     | 76076     | 48890.5   | 105104.5  | 118311    | 48208.5   | 11275.5   | 1           | 0.74257173  | 0.74257173  | 14357.75    | 13257      | Down             | 0.052847979266602                                             | MAP-1 export factor OS-Mus musculus GN-Rai1 PE-1 Sv-1                                                      |                                                                        |
| CPN5          | Q0D1W4    | 2  | 2  | 23101     | 24478.5   | 25696.5   | 34228     | 76076     | 26605.5   | 30449.5   | 29743     | 27285.5   | 1           | 0.742551142 | 0.742551142 | 23341.4     | 23551.5    | Down             | 0.104649130727235                                             | Copine-5 OS-Mus musculus GN-Cpn5 PE-1 Sv-1                                                                 |                                                                        |
| UMD2          | Q0C8G5    | 1  | 1  | 22469     | 21761     | 6186      | 12663     | 19032     | 18890     | 17706     | NA        | 30861     | NA          | 0.74262615  | 0.74262615  | 22427.2     | 22485.667  | Down             | 0.13867368191218                                              | UIM domain-containing protein 2 OS-Mus musculus GN-Umd2 PE-2 Sv-1                                          |                                                                        |
| SLC25A5       | PS1881    | 17 | 17 | 110053.47 | 184777.76 | 102013.94 | 311737.41 | 159929.82 | 231578.82 | 172448.88 | 95800.18  | 136450.41 | 99778.41    | 0.743189212 | 0.743189212 | 17071.68    | 15741.94   | Down             | 0.142066731303844                                             | ADP/ATP translocase 2 OS-Mus musculus GN-Slc25a5 PE-1 Sv-1                                                 |                                                                        |
| MRP19         | Q131H4    | 6  | 6  | 191731.3  | 315927.17 | 198474.5  | 211812.5  | 24226.31  | 231163.5  | 24552.5   | 11699.31  | 28021.3   | 10041       | 0.744162155 | 0.744162155 | 21010.766   | 19688.566  | Down             | 0.091817281325021                                             | Protein PRR42 OS-Mus musculus GN-Prpr42 PE-1 Sv-1                                                          |                                                                        |
| MRPS15        | Q0CQ73    | 3  | 3  | 18958.33  | 21578.67  | 18989     | 21394.67  | 23939.33  | 24400     | 55925     | 15575.67  | 10244.67  | 0.744313189 | 0.744313189 | 0.744313189 | 19981.1     | 10071.338  | Down             | 0.11341419907868                                              | 45 kDa calcium-binding protein OS-Mus musculus GN-Mrps15 PE-2 Sv-1                                         |                                                                        |
| ANKC1         | Q02357-3  | 5  | 5  | 7191.4    | 11284.8   | 2027.4    | 33372     | 28650.2   | 24146.6   | 21726     | 51651     | 11509.4   | 1           | 0.745211214 | 0.745211214 | 13548.76    | 15884.55   | Down             | 0.0229463399615668                                            | Enzyme E3 of Ankyrin-1 OS-Mus musculus GN-Ank1                                                             |                                                                        |
| MAOB          | Q0B8W5    | 1  | 1  | 31222     | 34118     | 70801     | 64781     | 35915     | 61221     | 42855     | NA        | 25306     | NA          | 0.744522326 | 0.744522326 | 47833.4     | 43127.333  | Down             | 0.1491141884316                                               | Amine oxidase (flavin-containing) B OS-Mus musculus GN-MaoB PE-1 Sv-4                                      |                                                                        |
| MIRP9         | Q099N4    | 1  | 1  | 31252     | 27598     | 55914     | 31662     | 26345     | 25996     | 25078     | 42345     | 35091     | 57254       | 0.744530291 | 0.744530291 | 34410       | 37452.8    | Down             | 0.110404305091443                                             | 29S ribosomal protein 19, mitochondrial OS-Mus musculus GN-Mirp9 PE-2 Sv-2                                 |                                                                        |
| PGC           | Q0CQ73    | 3  | 3  | 18958.33  | 21578.67  | 18989     | 21394.67  | 23939.33  | 24400     | 55925     | 15575.67  | 10244.67  | 0.744530291 | 0.744530291 | 0.744530291 | 19981.1     | 10071.338  | Down             | 0.11341419907868                                              | 45 kDa calcium-binding protein OS-Mus musculus GN-Mrps15 PE-2 Sv-1                                         |                                                                        |
| PARAH1B1      | PE3005-3  | 2  | 2  | 12002.5   | 16115.5   | 9746.5    | 11780     | 13121     | 13845     | 13884     | 2570.5    | 77221.5   | NA          | 0.744557864 | 0.744557864 | 12554.5     | 14380.25   | Down             | 0.195884184718003                                             | Isomform 2 of Platelet-activating factor acetylcholinesterase IB subunit alpha OS-Mus musculus GN-Parah1b1 |                                                                        |
| ARHGAP12      | Q0C0D4    | 1  | 1  | NA        | NA        | NA        | NA        | 3672      | 1395      | 2909      | 1032      | NA        | 1967        | NA          | 0.744588664 | 0.744588664 | 2483.5     | 1969.3333        | Down                                                          | 0.334667421339605                                                                                          | Rho GTPase-activating protein 12 OS-Mus musculus GN-Arhgap12 PE-1 Sv-2 |
| PHMPH         | Q0K8D0    | 3  | 3  | 13362.33  | 17259.33  | 5903.33   | 25328.67  | 18021.67  | 23202.33  | 16169     | 627       | 16260.33  | 5138.67     | 0.747476149 | 0.747476149 | 15975.066   | 14335.666  | Down             | 0.150212961369751                                             | Phytanoyl-CoA hydroxylase-interacting protein OS-Mus musculus GN-PhmpH PE-1 Sv-1                           |                                                                        |
| CP2B          | Q3U1W0    | 10 | 10 | 12502.22  | 12480.67  | 12663.67  | 15604.22  | 12946.89  | 17406.11  | 18636.22  | 5277.89   | 17085.67  | 1927.78     | 0.744767636 | 0.744767636 | 12339.54    | 12005.734  | Down             | 0.141128734551229                                             | Disso-interacting protein 2 homolog B OS-Mus musculus GN-Cp2b PE-1 Sv-1                                    |                                                                        |
| KIF1B         | Q05075-3  | 2  | 2  | 13973.5   | 10518.5   | NA        | 20136     | 12809.5   | 16372.5   | 17072.5   | NA        | 5976      | NA          | 0.745480489 | 0.745480489 | 13795.375   | 13140.333  | Down             | 0.221018414211526                                             | Isomform 3 of kinesin-type protein KIF1B OS-Mus musculus GN-Kif1b                                          |                                                                        |
| PLPFR2        | Q0VYF2    | 1  | 1  | 28992     | 48206     | 40963     | 85401     | 44830     | 60789     | 70855     | 51640     | 32347     | NA          | 0.745628631 | 0.745628631 | 49678.4     | 53907.75   | Down             | 0.117873986462899                                             | Isomform 2 of lipid phosphate phosphatase-related protein type 2 OS-Mus musculus GN-Plpfr2                 |                                                                        |
| DNM3          | Q0B8Z8    | 18 | 18 | 50563.67  | 67742.28  | 45000.83  | 94540.5   | 61457.28  | 74897.78  | 79370     | 57338.38  | 49441.38  | 38413.1     | 0.745654982 | 0.745654982 | 63790.912   | 59935.812  | Down             | 0.089932620384719                                             | Dynamin-3 OS-Mus musculus GN-Dnm3 PE-1 Sv-1                                                                |                                                                        |
| MARK1         | Q0V8V5    | 6  | 6  | 10748.33  | 12126.33  | 10954.17  | 15092.83  | 14445.83  | 16225.17  | 13460.33  | 15309     | 14431     | 6391.83     | 0.74605051  | 0.74605051  | 12491.498   | 13161.466  | Down             | 0.07592590382018                                              | Serine/threonine protein kinase MARK1 OS-Mus musculus GN-Mark1 PE-1 Sv-2                                   |                                                                        |
| ARMC1         | Q0D748    | 2  | 2  | 65998     | 73403.5   | 98832.5   | 44941     | 69374.5   | 71499.5   | 47044     | 81169     | 77265     | 67682       | 0.747092119 | 0.747092119 | 112664.585  | 70509.9    | Down             | 0.0614466661745811                                            | Armadillo repeat-containing protein 1 OS-Mus musculus GN-Armc1 PE-1 Sv-1                                   |                                                                        |
| PDMA6         | Q0Z2R8    | 6  | 6  | 40881.17  | 51238.33  | 49175.5   | 85669.17  | 38671.83  | 59530     | 47024.5   | 71633.67  | 45689.17  | 57674.83    | 0.747528084 | 0.747528084 | 53127.2     | 56386.434  | Down             | 0.0858974272343396                                            | Protein disulfide-isomerase A6 OS-Mus musculus GN-Pdma6 PE-1 Sv-1                                          |                                                                        |
| KCNQ2         | Q0Z151-13 | 2  | 2  | 2923      | 4401      | 3940.5    | 4141.5    | 5555.5    | 4460      | 5464.5    | 2166.5    | 7130      | NA          | 0.747632077 | 0.747632077 | 4392.7      | 4800.25    | Down             | 0.12800517048835                                              | Isomform 13 of potassium voltage-gated channel subfamily KQT member 2 OS-Mus musculus GN-Kcnq2             |                                                                        |
| AUN           | Q0Z151-13 | 5  | 5  | 166261.51 | 193897.27 | 153460.4  | 138551.2  | 147109.73 | 159952.51 | 162577.51 | 162452.51 | 135514.51 | 17810.33    | 0.748000077 | 0.748000077 | 147534.03   | 149988.157 | Down             | 0.071327506450588                                             | Methylenetetrahydrofolate synthase, mitochondrial OS-Mus musculus GN-Aun PE-1 Sv-1                         |                                                                        |
| GNR1          | Q0CQ73-5  | 2  | 2  | 18958.33  | 21578.67  | 18989     | 21394.67  | 23939.33  | 24400     | 55925     | 15575.67  | 10244.67  | 0.748052186 | 0.748052186 | 0.748052186 | 19981.1     | 10071.338  | Down             | 0.11341419907868                                              | 45 kDa calcium-binding protein OS-Mus musculus GN-Mrps15 PE-2 Sv-1                                         |                                                                        |
| ATK           | Q0CQW9    | 8  | 8  | 9811.12   | 10141.62  | 3839.62   | 19924.5   | 10665.5   | 14387.25  | 13341.5   | 4082.25   | 10589.88  | 6581.12     | 0.74800513  | 0.74800513  | 10876.672   | 9796.8     | Down             | 0.1508470801157                                               | Bifunctional nuclear biosynthesis protein PUIH OS-Mus musculus GN-Atk PE-1 Sv-2                            |                                                                        |
| LRP1B         | Q081H4    | 4  | 4  | 13325     | 20165     | 1793      | 6077      | 26795     | 42998.25  | 30324.5   | NA        | 1887      | NA          | 0.74846771  | 0.74846771  | 2697.05     | 3072.1667  | Down             | 0.10878471532701                                              | Low-density lipoprotein receptor-related protein 1B OS-Mus musculus GN-Lrp1b PE-1 Sv-1                     |                                                                        |
| 6 HNT4        | Q0CQ73    | 6  | 6  | 17227.45  | 16446.85  | 17696.78  | 16446.85  | 17696.78  | 16780.05  | 17197.33  | 17132.33  | 18788.5   | 67515.17    | 0.748678133 | 0.748678133 | 158183.27   | 158964.31  | Down             | 0.071327506450588                                             | High-density lipoprotein receptor-related protein 1 OS-Mus musculus GN-Hnt4 PE-1 Sv-3                      |                                                                        |
| UNEP          | Q0C128    | 2  | 2  | NA        | NA        | 8247      | 3270      | 22679     | 11907.5   | 8405.5    | NA        | 9530      | NA          | 0.751214727 | 0.751214727 | 10763.25    | 12796.5    | Down             | 0.192133968380712                                             | Insulin-catalytic aminopeptidase OS-Mus musculus GN-Unep PE-1 Sv-1                                         |                                                                        |
| CDND1         | P09099-3  | 20 | 20 | 16057.99  | 17405.18  | 11347.94  | 25285.76  | 19911.24  | 24358.41  | 19868.41  | 9488.82   | 15166.49  | 11607.74    | 0.748746411 | 0.748746411 | 14904.588   | 15047      | Down             | 0.097900523530357                                             | Isomform 3 of Catein-2 homolog OS-Mus musculus GN-Cnd1                                                     |                                                                        |
| GRASP         | Q081A9    | 1  | 1  | 33215     | 28882     | 23543     | 9493      | 36149     | 21845     | 23472     | 23339     | 46473     | NA          | 0.749049022 | 0.749049022 | 26256.4     | 28782.25   | Down             | 0.13210253847712                                              | General receptor for phosphoinositides 1-associated scaffold protein OS-Mus musculus GN-Grasp PE-1 Sv-2    |                                                                        |
| PLA5          | Q081A9    | 1  | 1  | 33215     | 28882     | 23543     | 9493      | 36149     | 21845     | 23472     | 23339     | 46473     | NA          | 0.749049022 | 0.749049022 | 26256.4     | 28782.25   | Down             | 0.13210253847712                                              | General receptor for phosphoinositides 1-associated scaffold protein OS-Mus musculus GN-Grasp PE-1 Sv-2    |                                                                        |
| WDR1          | Q0D819    | 12 | 12 | 70880     | 28497.5   | 11445.17  | 32919     | 36168     | 32079.25  | 61020.75  | 40193.5   | 7214.5    | 19688       | 0.749171486 | 0.749171486 | 7331.6      | 8075.5     | Down             | 0.10054103668353                                              | Perin-4 alpha-carbonyl dehydratase OS-Mus musculus GN-Wdr1 PE-1 Sv-2                                       |                                                                        |
| ATP2A3        | Q04518-3  | 3  | 3  | 14886.25  | 29917.88  | 5278.25   | 95098.62  | 21082.62  | 54028.25  | 44778.12  | 7433.12   | 19438.5   | 9602.12     | 0.749416005 | 0.749416005 | 33244.724   | 27056.027  | Down             | 0.297175662417083                                             | Isomform SERCASC of Sarcoplasmic/endoplasmic reticulum calcium ATPase 3 OS-Mus musculus GN-Atp2a3          |                                                                        |
| NSMF          | Q099N2-3  | 8  | 8  | 15064.67  | 15017     | 12753.33  | 15124.33  | 22067     | 19559     | 20055     | 8427      | 20729.33  | NA          | 0.749556075 | 0.749556075 | 16005.266   | 17147      | Down             | 0.099405346847956                                             | Isomform 3 of NMDA receptor synaptotagmin signaling and neuronal regulation factor OS-Mus musculus GN-Nsmf |                                                                        |
| CDV2          | Q4VAA2    | 7  | 7  | 78884.43  | 65597.57  | 65728.88  | 49945.29  | 63628.71  | 61556.29  | 61695.71  | 63955.71  | 98839     | 14844.29    | 0.749864731 | 0.749864731 | 64595.372   | 60180      | Down             | 0.11018049439042                                              | Protein CDV2 OS-Mus musculus GN-Cdv2 PE-1 Sv-2                                                             |                                                                        |
| THY1          | P01811    | 16 | 16 | 28614.44  | 47827.38  | 39694.11  | 71656.12  | 34729.88  | 64481.19  | 74112.12  | 34729.88  | 48324.5   | 0.750076143 | 0.750076143 | 47355.5     | 51370.65    | Down       | 0.10184076034341 | Thy-1 membrane glycoprotein OS-Mus musculus GN-Thy1 PE-1 Sv-1 |                                                                                                            |                                                                        |
| CNDP2         | Q0C1A2    | 7  | 7  | 15367.29  | 19957.57  | 19034     | 23709.14  | 19305     | 23330.71  | 21874.57  | 24174.14  | 23856.29  | 9900        | 0.750064892 | 0.750064892 | 149158.743  | 149158.743 | Down             | 0.100849990203931                                             | Cytosolic non-specific dipeptidase OS-Mus musculus GN-Cndp2 PE-1 Sv-1                                      |                                                                        |
| ADAR50SP20R1K | Q0C1A2    | 7  | 7  | 15367.29  | 19957.57  | 19034     | 23709.14  | 19305     | 23330.71  | 21874.57  | 24174.14  | 23856.29  | 9900        | 0.750064892 | 0.750064892 | 149158.743  | 149158.743 | Down             | 0.100849990203931                                             | Cytosolic non-specific dipeptidase OS-Mus musculus GN-Cndp2 PE-1 Sv-1                                      |                                                                        |
| 6 HNT4        | Q0CQ73    | 6  | 6  | 17227.45  | 16446.85  | 17696.78  | 16446.85  | 17696.78  | 16780.05  | 17197.33  | 17132.33  | 18788.5   | 67515.17    | 0.748678133 | 0.748678133 | 158183.27   | 158964.31  | Down             | 0.071327506450588                                             | High-density lipoprotein receptor-related protein 1 OS-Mus musculus GN-Hnt4 PE-1 Sv-3                      |                                                                        |
| NECAB2        | Q012P2-2  | 2  | 2  | 14573     | 13036     | 1934      | 20396     | 11675.5   | 22666     | 12775.5   | 6080.5    | 22341.5   | 5356.5      | 0.752128346 | 0.752128346 | 12274.9     | 13844.4    | Down             | 0.17362100196866                                              | Isomform 2 of N-terminal EF-hand calcium-binding protein 2 OS-Mus musculus GN-Necab2                       |                                                                        |
| PP1R1A        | Q0E8T9    | 5  | 5  | 117750    | 104250.33 | 125806    | 81710.33  | 97618     | 98139     | 103310    | 158710.33 | 121712.33 | 2024.3      | 0.753182878 | 0.753182878 | 105440.53   | 96417.198  | Down             | 0.12906714552928                                              | Protein phosphatase 1 regulatory subunit 1A OS-Mus musculus GN-Pp1r1a PE-1 Sv-1                            |                                                                        |
| IR52          | PI8122    | 1  | 1  | 18798     | 19566     | 33124     | 22318     | 26920     | 217       |           |           |           |             |             |             |             |            |                  |                                                               |                                                                                                            |                                                                        |

|               |          |     |     |             |           |           |           |           |           |           |           |          |                     |                                                              |             |           |           |                      |                                                              |                                                              |                                                              |
|---------------|----------|-----|-----|-------------|-----------|-----------|-----------|-----------|-----------|-----------|-----------|----------|---------------------|--------------------------------------------------------------|-------------|-----------|-----------|----------------------|--------------------------------------------------------------|--------------------------------------------------------------|--------------------------------------------------------------|
| BCAF1         | P99029   | 49  | 49  | 159162.69   | 173250.61 | 154277.12 | 189368.05 | 194143.78 | 143748.12 | 143748.12 | 176436.61 | Down     | -0.0404952727495749 | Perovirexin-5, mitochondrial OSMs-musculus GN-Prdx5 PE1 Sv-2 |             |           |           |                      |                                                              |                                                              |                                                              |
| BCRPI1        | OR019-3  | 3   | 3   | 49524.34    | 35090.33  | 38417.67  | 43624     | 45863     | 45246.33  | 45474.67  | 17329.67  | 51466    | NA                  | 0.114711903                                                  | 2           | 2         | 4282.666  | 39931.66             | Down                                                         | -0.0893498986241626                                          | Perovirexin-5, mitochondrial OSMs-musculus GN-Prdx5 PE1 Sv-2 |
| CDZ11         | OR019-6  | 2   | 2   | 4859.5      | 4961.15   | 39718.5   | 2417      | 42945     | 38484     | 49477.5   | 48660.5   | 73310    | 0.767827705         | 0.114654215                                                  | 38989.2     | 41065.5   | Down      | -0.05872304418621292 | Perovirexin-5, mitochondrial OSMs-musculus GN-Prdx5 PE1 Sv-2 |                                                              |                                                              |
| GNR96         | AA298-2  | 14  | 14  | 22808       | 26062.14  | 187454.93 | 25922.14  | 25138.43  | 30081.36  | 31454     | 23519.78  | 29817.21 | 13601.71            | 0.105306882                                                  | 24537.2     | 25608.63  | Up        | 0.066505758508461    | Perovirexin-5, mitochondrial OSMs-musculus GN-Prdx5 PE1 Sv-2 |                                                              |                                                              |
| MARCKS1       | P28667   | 25  | 25  | 17020       | 11888.23  | 18821.59  | 36466.05  | 15995.41  | 38811.32  | 22282.86  | 24716.09  | 29728.27 | 16283.23            | 0.768846651                                                  | 0.114616418 | 22038.256 | 23364.954 | Up                   | 0.0842990851590143                                           | Perovirexin-5, mitochondrial OSMs-musculus GN-Prdx5 PE1 Sv-2 |                                                              |
| TMEM81        | QRV242   | 5   | 5   | 57975.8     | 44108     | 54851.2   | 30493.8   | 42823.6   | 36035     | 50308     | 63301.8   | 50359.8  | 39014               | 0.769113416                                                  | 0.114096913 | 46050.48  | 48303.2   | Up                   | 0.0629166741259                                              | Perovirexin-5, mitochondrial OSMs-musculus GN-Prdx5 PE1 Sv-2 |                                                              |
| TMEM81        | QRV242   | 1   | 1   | 14789       | 14047     | 15924     | 1994      | 16079     | 15722     | 15722     | 15722     | 15722    | 15722               | 0.769113416                                                  | 0.114096913 | 46050.48  | 48303.2   | Up                   | 0.0629166741259                                              | Perovirexin-5, mitochondrial OSMs-musculus GN-Prdx5 PE1 Sv-2 |                                                              |
| NUTL2         | Q241-3   | 2   | 2   | 69393.81    | 49521     | 64813.15  | 17985.5   | 41303     | 28072.15  | 27619.5   | 32065.15  | 38116.15 | 0.769113416         | 0.114096913                                                  | 46050.48    | 48303.2   | Up        | 0.0629166741259      | Perovirexin-5, mitochondrial OSMs-musculus GN-Prdx5 PE1 Sv-2 |                                                              |                                                              |
| CCDC177       | Q13U88   | 10  | 10  | 36025       | 35666.8   | 27244.9   | 37315.7   | 40714.9   | 41586.3   | 40014.1   | 19172.7   | 33417.8  | 11108.4             | 0.76956105                                                   | 0.113755653 | 35572.46  | 33059.78  | Down                 | -0.105725051517786                                           | Perovirexin-5, mitochondrial OSMs-musculus GN-Prdx5 PE1 Sv-2 |                                                              |
| DDX17         | Q50116   | 11  | 11  | 52751.82    | 38897.64  | 40479.64  | 25963.73  | 42821     | 35488.55  | 35896.55  | 48783.91  | 42081    | 48308.27            | 0.770050037                                                  | 0.113177725 | 40842.766 | 42231.655 | Up                   | 0.0482442467689882                                           | Perovirexin-5, mitochondrial OSMs-musculus GN-Prdx5 PE1 Sv-2 |                                                              |
| DBNL          | Q40556   | 44  | 44  | 46017.45    | 41897.45  | 46830.19  | 39928.19  | 41289.38  | 37026.94  | 46308.52  | 41065.05  | 47474.07 | 43502.83            | 0.770050037                                                  | 0.113177725 | 40842.766 | 42231.655 | Up                   | 0.0482442467689882                                           | Perovirexin-5, mitochondrial OSMs-musculus GN-Prdx5 PE1 Sv-2 |                                                              |
| HUWE1         | Q17MY8-3 | 2   | 2   | 1           | 61887.5   | 4595.5    | 1813.5    | 15791     | 5985.5    | 12252.5   | 10042     | 3600     | 1279                | NA                                                           | 0.113071951 | 5469.8    | 6658.375  | Up                   | 0.24722242110288                                             | Perovirexin-5, mitochondrial OSMs-musculus GN-Prdx5 PE1 Sv-2 |                                                              |
| PRPF40A       | QRIC17   | 2   | 2   | 14897       | 11898     | 7457      | 5740      | 11310     | 7570      | 11310     | 7570      | 11310    | 7570                | 0.770050037                                                  | 0.113071951 | 5469.8    | 6658.375  | Up                   | 0.24722242110288                                             | Perovirexin-5, mitochondrial OSMs-musculus GN-Prdx5 PE1 Sv-2 |                                                              |
| AB13          | OR017-1  | 1   | 1   | 26438       | 21028     | 34164     | 13952     | 27823     | 21333     | 27250     | NA        | 29457    | NA                  | 0.771081281                                                  | 0.11289994  | 24699     | 25980     | Up                   | 0.0729487886643445                                           | Perovirexin-5, mitochondrial OSMs-musculus GN-Prdx5 PE1 Sv-2 |                                                              |
| GPIN2         | OR08W5   | 5   | 5   | 19541.8     | 23315.6   | 11108     | 17054.8   | 20399.2   | 19699     | 21815.4   | 60664     | 20388.2  | 0.77151037          | 0.112658138                                                  | 18283.88    | 18283.88  | Down      | -0.10569535258779    | Perovirexin-5, mitochondrial OSMs-musculus GN-Prdx5 PE1 Sv-2 |                                                              |                                                              |
| OSG2          | Q2C24-3  | 10  | 10  | 3209.3      | 758.9     | 2561.3    | 16049.5   | 8869.8    | 13504.1   | 11466.5   | 2110.2    | 13931.4  | NA                  | 0.772682103                                                  | 0.112558578 | 21372.08  | 20735.05  | Up                   | 0.158737369932633                                            | Perovirexin-5, mitochondrial OSMs-musculus GN-Prdx5 PE1 Sv-2 |                                                              |
| BAB1A         | P6281    | 6   | 6   | 17006.33    | 23576     | 16521.83  | 27119.87  | 21574     | 26103     | 32040     | 13941.67  | 18043.67 | 9462                | 0.771695193                                                  | 0.112554205 | 19858.988 | 19858.988 | Down                 | -0.0975511489443514                                          | Perovirexin-5, mitochondrial OSMs-musculus GN-Prdx5 PE1 Sv-2 |                                                              |
| SPFN1         | P16546   | 267 | 267 | 47768.42    | 61510.32  | 35172.62  | 96241.76  | 64435.39  | 73197.13  | 74873.73  | 41325.97  | 62145.2  | 33715.42            | 0.771800149                                                  | 0.112595142 | 61025.702 | 75055.49  | Down                 | -0.0970512735643918                                          | Perovirexin-5, mitochondrial OSMs-musculus GN-Prdx5 PE1 Sv-2 |                                                              |
| 1700221F05R1K | OR0C74   | 4   | 4   | 103797.75   | 80655.5   | 90095     | 43730.25  | 79910.5   | 72603.25  | 73099.75  | 101028.25 | 96567.75 | 60065.75            | 0.771841458                                                  | 0.112487237 | 84567.8   | 80677.75  | Down                 | -0.068203453478277                                           | Perovirexin-5, mitochondrial OSMs-musculus GN-Prdx5 PE1 Sv-2 |                                                              |
| GRM5          | Q13U55   | 5   | 5   | 14040.75    | 15490.75  | 4156.5    | 31139.25  | 16920.75  | 23245.25  | 21471.75  | 12636.5   | 14146.5  | NA                  | 0.772254839                                                  | 0.116314    | 17880     | 17880     | Up                   | 0.128932521566147                                            | Perovirexin-5, mitochondrial OSMs-musculus GN-Prdx5 PE1 Sv-2 |                                                              |
| NAV1          | OR0C74   | 4   | 4   | 18132.25    | 18688.25  | 11657.75  | 19050.5   | 22113.25  | 18920     | 26095.25  | 3551.5    | 27584    | 4586.25             | 0.772273533                                                  | 0.112732353 | 17298.4   | 16243.05  | Down                 | -0.1414475049101                                             | Perovirexin-5, mitochondrial OSMs-musculus GN-Prdx5 PE1 Sv-2 |                                                              |
| LSM7          | QR0C08   | 1   | 1   | 6964        | 4790      | 6181      | 5696      | 8338      | 8691      | 6340      | 3092      | 7355     | 8240                | 0.773136785                                                  | 0.111743663 | 6393.8    | 6743.6    | Up                   | 0.076845374748664                                            | Perovirexin-5, mitochondrial OSMs-musculus GN-Prdx5 PE1 Sv-2 |                                                              |
| AB115         | OR08G6   | 2   | 2   | 21291       | 28459.5   | 22238.5   | 14851.5   | 32147.5   | 26994.5   | 30364     | 2758      | 39394.5  | 22281.5             | 0.773204554                                                  | 0.111672917 | 28198     | 29143.5   | Up                   | 0.0560216095542159                                           | Perovirexin-5, mitochondrial OSMs-musculus GN-Prdx5 PE1 Sv-2 |                                                              |
| CDC42BP       | Q20496   | 12  | 11  | 38538.92    | 34889.92  | 41759.08  | 23845.75  | 34348     | 33933     | 35369.98  | 23940.08  | 47323    | 19134.42            | 0.774071212                                                  | 0.111492929 | 34676.334 | 33940.816 | Up                   | 0.0524747373892155                                           | Perovirexin-5, mitochondrial OSMs-musculus GN-Prdx5 PE1 Sv-2 |                                                              |
| CPBA          | Q17V88-3 | 1   | 1   | 20576       | 26558     | 10168     | 13322     | 13707     | 20241     | 28879     | NA        | 17077    | NA                  | 0.774171212                                                  | 0.11162982  | 20464.2   | 22049     | Up                   | 0.1074696677999                                              | Perovirexin-5, mitochondrial OSMs-musculus GN-Prdx5 PE1 Sv-2 |                                                              |
| DBN1          | QR0X56-3 | 41  | 41  | 42636.87    | 46440.9   | 50432.51  | 42101.92  | 43659.51  | 38914.31  | 48886.1   | 50129.31  | 46849.21 | 0.774350757         | 0.110961312                                                  | 45054.342   | 45801.366 | Up        | 0.0237244776523181   | Perovirexin-5, mitochondrial OSMs-musculus GN-Prdx5 PE1 Sv-2 |                                                              |                                                              |
| EEF1D         | P57776   | 16  | 16  | 57836.54    | 50095.4   | 78812.31  | 33411.31  | 47964.67  | 44472     | 48594.6   | 61943.8   | 6065.39  | 61722               | 0.774856454                                                  | 0.110778735 | 53368.026 | 56055.32  | Up                   | 0.0645791670565221                                           | Perovirexin-5, mitochondrial OSMs-musculus GN-Prdx5 PE1 Sv-2 |                                                              |
| CRP1B         | Q18018   | 23  | 23  | 52536.52    | 73614.17  | 59664.17  | 95005.22  | 73331.43  | 82159.61  | 76555.76  | 78555.09  | 6265.96  | 71047               | 0.775156175                                                  | 0.110551201 | 72150.502 | 73310.742 | Up                   | 0.103512071                                                  | Perovirexin-5, mitochondrial OSMs-musculus GN-Prdx5 PE1 Sv-2 |                                                              |
| SNRP          | P615-3   | 6   | 6   | 61885.23    | 7129      | 7729      | 7514      | 47093     | 7514      | 47093     | 7514      | 47093    | 7514                | 0.775040584                                                  | 0.110551201 | 72150.502 | 73310.742 | Up                   | 0.103512071                                                  | Perovirexin-5, mitochondrial OSMs-musculus GN-Prdx5 PE1 Sv-2 |                                                              |
| ANP28         | QR05T5   | 1   | 1   | 5164        | 17654     | NA        | 17961     | 18642     | 17561     | 18642     | 17561     | 18642    | 17561               | 0.776453217                                                  | 0.109896273 | 17758.25  | 19364     | Up                   | 0.1488758207806781                                           | Perovirexin-5, mitochondrial OSMs-musculus GN-Prdx5 PE1 Sv-2 |                                                              |
| ADAM23        | QRV147   | 9   | 9   | 32795.22    | 40980.99  | 25596.89  | 42421.22  | 39648.67  | 44405     | 44232.56  | 34736.11  | 38147    | 11518.78            | 0.776532112                                                  | 0.109896273 | 17758.25  | 19364     | Up                   | 0.1488758207806781                                           | Perovirexin-5, mitochondrial OSMs-musculus GN-Prdx5 PE1 Sv-2 |                                                              |
| CD34          | Q20496-2 | 9   | 9   | 13097.48293 | 12179.33  | 18514.33  | 24699.33  | 18269.33  | 24699.33  | 18269.33  | 24699.33  | 18269.33 | 24699.33            | 0.776532112                                                  | 0.109896273 | 17758.25  | 19364     | Up                   | 0.1488758207806781                                           | Perovirexin-5, mitochondrial OSMs-musculus GN-Prdx5 PE1 Sv-2 |                                                              |
| ACAD          | P52139   | 15  | 15  | 26982.4     | 32689.2   | 26982.4   | 51021.82  | 41027.27  | 43735.4   | 47140.43  | 71862.43  | 86954.43 | 0.776532112         | 0.109896273                                                  | 17758.25    | 19364     | Up        | 0.1488758207806781   | Perovirexin-5, mitochondrial OSMs-musculus GN-Prdx5 PE1 Sv-2 |                                                              |                                                              |
| TMEM          | Q13U74   | 7   | 7   | 61256.71    | 58014.71  | 71326.43  | 95887.71  | 60532.86  | 73086.71  | 59796.43  | 71862.43  | 86954.43 | 0.776532112         | 0.109896273                                                  | 17758.25    | 19364     | Up        | 0.1488758207806781   | Perovirexin-5, mitochondrial OSMs-musculus GN-Prdx5 PE1 Sv-2 |                                                              |                                                              |
| HCN4          | Q20496   | 1   | 1   | 2878        | 4416      | NA        | 14184     | 8396      | 9508      | 12300     | NA        | 3716     | NA                  | 0.777351507                                                  | 0.109402633 | 7441      | 8509      | Up                   | 0.19349307344123                                             | Perovirexin-5, mitochondrial OSMs-musculus GN-Prdx5 PE1 Sv-2 |                                                              |
| MBP           | P24689   | 1   | 1   | 1277        | 6059      | NA        | 25771     | 8658      | 11294     | 10089     | NA        | 8380     | NA                  | 0.777702043                                                  | 0.109402633 | 7441      | 8509      | Up                   | 0.19349307344123                                             | Perovirexin-5, mitochondrial OSMs-musculus GN-Prdx5 PE1 Sv-2 |                                                              |
| CD44          | Q20496   | 1   | 1   | 4927        | 9150      | NA        | 21129     | 16596     | 21129     | 16596     | 21129     | 16596    | 21129               | 0.777702043                                                  | 0.109402633 | 7441      | 8509      | Up                   | 0.19349307344123                                             | Perovirexin-5, mitochondrial OSMs-musculus GN-Prdx5 PE1 Sv-2 |                                                              |
| CCR8          | P42932   | 15  | 15  | 16991.2     | 30384.87  | 22381.53  | 47872.53  | 29715.53  | 40523.67  | 37773.33  | 20242.47  | 33364    | 2685.13             | 0.777867918                                                  | 0.109094414 | 29469.392 | 26971.72  | Down                 | -0.130687516389473                                           | Perovirexin-5, mitochondrial OSMs-musculus GN-Prdx5 PE1 Sv-2 |                                                              |
| LYPLA2        | QRW17L   | 1   | 1   | 12546       | 27341     | NA        | 30949     | 23788     | 21971     | 28454     | NA        | NA       | NA                  | 0.77811291                                                   | 0.108711291 | 23656     | 25212.15  | Up                   | 0.091933030267362                                            | Perovirexin-5, mitochondrial OSMs-musculus GN-Prdx5 PE1 Sv-2 |                                                              |
| ADGRB2        | OR0G1-3  | 8   | 8   | 27758.88    | 31521.12  | 21078.5   | 67824.5   | 60313.62  | 67710.25  | 59055     | 194848.62 | 69366.5  | 3977.75             | 0.778834868                                                  | 0.108554613 | 44682.924 | 50251.624 | Up                   | 0.169464627390324                                            | Perovirexin-5, mitochondrial OSMs-musculus GN-Prdx5 PE1 Sv-2 |                                                              |
| SPFN1         | P16546-2 | 254 | 254 | 43448.19    | 57595.32  | 35164.06  | 91068.76  | 90304.9   | 69774.8   | 69318.24  | 42046.87  | 57004.21 | 32548.69            | 0.778834868                                                  | 0.108554613 | 44682.924 | 50251.624 | Up                   | 0.169464627390324                                            | Perovirexin-5, mitochondrial OSMs-musculus GN-Prdx5 PE1 Sv-2 |                                                              |
| SPFN1         | Q62261-2 | 143 | 143 | 17325.91    | 40774.52  | 16300.7   | 133141.85 | 41360.74  | 72301.18  | 70719.39  | 19475.89  | 32905.21 | 17377.98            | 0.779107531                                                  | 0.10862528  | 41974.784 | 42760.84  | Down                 | -0.2262542173760862                                          | Perovirexin-5, mitochondrial OSMs-musculus GN-Prdx5 PE1 Sv-2 |                                                              |
| MTF3          | QR0C75   | 3   | 3   | 18165       | 20247.67  | 10775.67  | 22298.67  | 18032.67  | 24754     | 17581     | 35928.67  | NA       | 0.779107531         | 0.10862528                                                   | 41974.784   | 42760.84  | Down      | -0.2262542173760862  | Perovirexin-5, mitochondrial OSMs-musculus GN-Prdx5 PE1 Sv-2 |                                                              |                                                              |
| CD34          | Q20496   | 1   | 1   | 4926        | 9150      | NA        | 21129     | 16596     | 21129     | 16596     | 21129     | 16596    | 21129               | 0.779107531                                                  | 0.10862528  | 41974.784 | 42760.84  | Down                 | -0.2262542173760862                                          | Perovirexin-5, mitochondrial OSMs-musculus GN-Prdx5 PE1 Sv-2 |                                                              |
| CCDC136       | QR17A9   | 11  | 11  | 2627.18     | 6628.73   | 1206.73   | 20118     | 7752.82   | 13206.64  | 12064.09  | 5383.64   | 4676.36  | NA                  | 0.780054053                                                  | 0.107877239 | 7666.892  | 8832.623  | Up                   | 0.204209758482773                                            | Perovirexin-5, mitochondrial OSMs-musculus GN-Prdx5 PE1 Sv-2 |                                                              |
| ABR010A02OR1K | Q307B0   | 14  | 14  | 24628.69    | 21427.77  | 19270     | 25080.77  | 25210.38  | 18554.92  | 16457.77  | 33499.92  | 15415.94 | 0.780054053         | 0.107877239                                                  | 7666.892    | 8832.623  | Up        | 0.204209758482773    | Perovirexin-5, mitochondrial OSMs-musculus GN-Prdx5 PE1 Sv-2 |                                                              |                                                              |
| ACAA2         | OR0W17   | 25  | 25  | 62555.6     | 62218.16  | 58072.08  | 56006.1   | 67890.44  | 67104.84  | 61623.84  | 78937.72  | 66865.8  | 44156.32            | 0.780136939                                                  | 0.107481642 | 61567.62  | 63117.704 | Up                   | 0.038492480747351                                            | Perovirexin-5, mitochondrial OSMs-musculus GN-Prdx5 PE1 Sv-2 |                                                              |
| CD34          | Q20496-2 | 9   | 9   | 13097.48293 | 12179.33  | 18514.33  | 24699.33  | 18269.33  | 24699.33  | 18269.33  | 24699.33  | 18269.33 | 24699.33            | 0                                                            |             |           |           |                      |                                                              |                                                              |                                                              |

|         |           |           |           |           |           |           |           |           |           |           |           |            |             |             |             |           |                                                                             |                                                                                                    |                                                                                       |
|---------|-----------|-----------|-----------|-----------|-----------|-----------|-----------|-----------|-----------|-----------|-----------|------------|-------------|-------------|-------------|-----------|-----------------------------------------------------------------------------|----------------------------------------------------------------------------------------------------|---------------------------------------------------------------------------------------|
| HSPD1   | PE3638    | 152       | 152       | 144774.9  | 118026.36 | 104922.28 | 85958.86  | 105294.36 | 101551.58 | 114326.22 | 102323.15 | 102552.29  | 124158.23   | 0.79621614  | 0.098896937 | 10590.35  | 10674.21                                                                    | Down                                                                                               | 60 kDa heat shock protein, mitochondrial O5-Mus-musculus GN-Hsp60-1 PE-1 Sv-1         |
| SH2D5   | OR18W5    | 1         | 1         | NA        | 4557      | NA        | 41125     | 4096      | 15158     | 14126     | NA        | NA         | NA          | 0.088725636 | 16082.667   | 13312     | Down                                                                        | SH2 domain-containing protein 5 O5-Mus-musculus GN-SH2d5 PE-2 Sv-2                                 |                                                                                       |
| HSPD1A  | PE3638    | 6         | 77        | 131935.62 | 122598.72 | 83477.88  | 117591.28 | 102499.48 | 115526.78 | 111728.76 | 99511.32  | 118424.85  | 0.08974887  | 15544.86    | 119552.03   | Down      | 60 kDa heat shock protein, mitochondrial O5-Mus-musculus GN-Hsp60-1         |                                                                                                    |                                                                                       |
| THNDC12 | OR18W5    | 5         | 5         | 162678.6  | 9955      | 97073.8   | 117275.8  | 119383.8  | 123585.8  | 147372.8  | NA        | 0.08920595 | 148681.25   | 113065802   | 142871.7    | Down      | Thiodienon domain-containing protein-12 O5-Mus-musculus GN-Thn12 PE-2 Sv-1  |                                                                                                    |                                                                                       |
| VAPA    | QRWV55    | 7         | 7         | 13117.7   | 2862.29   | 28758.43  | 81862.49  | 24242.43  | 46424.43  | 38856.44  | 23006     | 33227.57   | 9946.86     | 0.79856074  | 34808.23    | 31192.2   | Down                                                                        | Vesicle-associated membrane protein-associated protein A O5-Mus-musculus GN-Vapa PE-1 Sv-2         |                                                                                       |
| GNAS    | Q6R8H7    | 7         | 7         | 42840.57  | 63204.43  | 45680.57  | 100992    | 64444.57  | 89439.86  | 104343.14 | 59585.29  | 57290.57   | 27957       | 0.79803697  | 63752.428   | 67723.177 | Down                                                                        | Guanine nucleotide-binding protein G12 subunit alpha isoforms Xa O5-Mus-musculus GN-Gnas PE-2 Sv-1 |                                                                                       |
| ARCNG10 | OR18W5    | 1         | 1         | 5541      | 5522      | 5479      | 5672      | 5635      | 5574      | 5574      | 5574      | 5574       | 5574        | 0.08974887  | 15544.86    | 119552.03 | Down                                                                        | Armadillo repeat-containing protein 10 O5-Mus-musculus GN-Arcng10 PE-1 Sv-1                        |                                                                                       |
| DNM1    | P29053-3  | 51        | 51        | 83953.45  | 14163.89  | 38018.12  | 72349.3   | 52289.86  | 63786.6   | 62803.12  | 45610.4   | 42873.86   | NA          | 0.09725642  | 52134.916   | 49844.098 | Down                                                                        | Formin 5 of Dynamin-1 O5-Mus-musculus GN-Dnm1                                                      |                                                                                       |
| GRN28   | Q10097    | 24        | 24        | 11621.52  | 21943.61  | 9753.65   | 47226.87  | 28124.57  | 39037.83  | 39901.87  | 15343.05  | 22725      | 13773.96    | 0.79927219  | 23734.04    | 26056.662 | Down                                                                        | Glutamate receptor ionotropic, NMDA 28 O5-Mus-musculus GN-Grn28 PE-1 Sv-3                          |                                                                                       |
| GCCH    | Q60759    | 1         | 1         | 2297      | 9878      | 9676      | 6932      | 7320      | 7985      | NA        | NA        | NA         | 0.097293674 | 7161        | 7652.61     | Down      | Glutaryl-CoA dehydrogenase, mitochondrial O5-Mus-musculus GN-Gcch PE-1 Sv-2 |                                                                                                    |                                                                                       |
| ABUM1   | GRK450-4  | 12        | 12        | 19892.81  | 25707.87  | 13777.67  | 23102.47  | 26124.44  | 24870.58  | 26773.89  | 18012.25  | 30248.33   | 6781.75     | 0.79918843  | 22532.852   | 21439.548 | Down                                                                        | Ubiquitin-protein ligase 1 O5-Mus-musculus GN-Abum1                                                |                                                                                       |
| UBQLY1  | QD2372    | 16        | 16        | 38840.29  | 71323.29  | 23668.29  | 21235.43  | 33163.29  | 30528.14  | 33968.23  | 36481.86  | 36730.29   | 26938.21    | 0.09316409  | 33508.246   | 32549.541 | Down                                                                        | Ubiquitin-protein ligase 1 O5-Mus-musculus GN-Ubqly1 PE-1 Sv-2                                     |                                                                                       |
| DNM1L   | QK18M6-15 | 15        | 15        | 19123.43  | 25795.64  | 21557.29  | 44020.36  | 26217.21  | 33773.93  | 33543.14  | 18759.93  | 24682.57   | NA          | 0.096130835 | 27342.786   | 28737.956 | Down                                                                        | Formin 1 of Dynamin-1 O5-Mus-musculus GN-Dnm1L                                                     |                                                                                       |
| SLC6A11 | P31365    | 9         | 9         | 19511.44  | 38894.22  | 10026.11  | 115959.64 | 35772.33  | 62674.43  | 62320     | 13749.44  | 33566.11   | 19486.33    | 0.801132557 | 48454.78    | 38539.241 | Down                                                                        | Sodium- and chloride-dependent GABA transporter 3 O5-Mus-musculus GN-Slc6a11 PE-1 Sv-2             |                                                                                       |
| ARHGGE7 | OR18W5-4  | 6         | 6         | 34788.6   | 48255.8   | 38870     | 709310.6  | 50201.8   | 55214     | 52143.8   | 27871.6   | 51128.8    | 45504.2     | 0.09605245  | 44354.76    | 4617.708  | Down                                                                        | Formin 6 of rho guanine nucleotide exchange factor 7 O5-Mus-musculus GN-Arhg7                      |                                                                                       |
| UBQLY1  | QD2372    | 16        | 16        | 38840.29  | 71323.29  | 23668.29  | 21235.43  | 33163.29  | 30528.14  | 33968.23  | 36481.86  | 36730.29   | 26938.21    | 0.09316409  | 33508.246   | 32549.541 | Down                                                                        | Ubiquitin-protein ligase 1 O5-Mus-musculus GN-Ubqly1 PE-1 Sv-2                                     |                                                                                       |
| BMND3   | Q318U5    | 2         | 2         | 11331     | 19795     | 15464.5   | 20908     | 16500     | 22072     | 27300     | 13003.5   | 9385       | NA          | 0.081929891 | 0.09586355  | 16282.1   | 15440.125                                                                   | Down                                                                                               | Regulator of microtubule dynamics protein 3 O5-Mus-musculus GN-Bmnd3 PE-1 Sv-3        |
| CWKS9   | QB8M4A    | 2         | 2         | 13497     | 18282     | 5765      | 30540.5   | 17869     | 26636.5   | 27371     | 9988      | 21673.5    | 7765        | 0.802064022 | 0.09579064  | 17190.7   | 18686.8                                                                     | Down                                                                                               | Connector enhancer of kinase suppressor of ras 3 O5-Mus-musculus GN-Cwks9 PE-1 Sv-1   |
| RP510   | PE3125    | 11        | 11        | 98946.36  | 97405.91  | 136986.36 | 73999.73  | 79042.18  | 75500     | 98388.18  | 90138.09  | 131880.36  | 70874.09    | 0.80214654  | 92776.108   | 93382.144 | Down                                                                        | 40S ribosomal protein S10 O5-Mus-musculus GN-Rp510 PE-1 Sv-1                                       |                                                                                       |
| PP1Y12B | Q61415    | 1         | 1         | 1563      | 12096     | NA        | 7708      | 2170      | 9024      | 1807      | NA        | NA         | NA          | 0.095453258 | 34029.25    | 20025     | Down                                                                        | Apoptosis-stimulating of p53 protein 1 O5-Mus-musculus GN-Pp1y12b PE-2 Sv-2                        |                                                                                       |
| ARGAP44 | Q553M3-4  | 1         | 1         | 62797     | 94452     | 92265     | 103705    | 71959     | 93105     | 88935     | 53060     | 88935      | NA          | 0.803105306 | 0.095227905 | 85041.6   | 81842                                                                       | Down                                                                                               | Formin 4 of rho GTPase-activating protein 44 O5-Mus-musculus GN-Argap44               |
| TPPP    | Q710D2    | 37        | 37        | 176898.38 | 131164.97 | 139489.19 | 121166.22 | 158336.22 | 129791.89 | 136274.25 | 146583.22 | 149532.25  | 150771      | 0.803427227 | 0.095170525 | 145411.04 | 142590.76                                                                   | Down                                                                                               | Tubulin polymerization-promoting protein O5-Mus-musculus GN-Tppp PE-1 Sv-1            |
| MT19P   | QRV005    | 33        | 33        | 4316.07   | 10496.93  | 4227.1    | 34094.83  | 14846.5   | 20287.12  | 20595.23  | 3698.27   | 11837.43   | 2893.53     | 0.803727759 | 3396.28     | 1184.326  | Down                                                                        | Myosin 9 O5-Mus-musculus GN-Mt19p PE-1 Sv-4                                                        |                                                                                       |
| MMP23   | QRV222    | 11        | 11        | 27948.18  | 21104.27  | 26083     | 20976.83  | 22295.18  | 22439.64  | 23857.27  | 14510.18  | 26964.73   | 80114.63    | 0.09501386  | 22674.49    | 23395.854 | Up                                                                          | 28S ribosomal protein S23, mitochondrial O5-Mus-musculus GN-Mmp23 PE-1 Sv-1                        |                                                                                       |
| NSFL1C  | QRCC4     | 4         | 4         | 9990.78   | 8223.67   | 2845.89   | 17765.22  | 10313.44  | 14212.56  | 11976.56  | 2344.67   | 14312      | NA          | 0.803494941 | 0.095016853 | 9747.81   | 10711.448                                                                   | Up                                                                                                 | NSFL1 cofactor p47 O5-Mus-musculus GN-Nsfl1c PE-1 Sv-1                                |
| MMP26   | QR0523    | 5         | 5         | 18277.8   | 18536     | 4926      | 24876.6   | 16071.8   | 20472     | 19576.66  | 6990.2    | 24308.6    | NA          | 0.80371851  | 0.09489608  | 16538.04  | 17842.851                                                                   | Up                                                                                                 | 28S ribosomal protein S26, mitochondrial O5-Mus-musculus GN-Mmp26 PE-1 Sv-1           |
| AFON    | QD501L    | 12        | 12        | 10620.58  | 16548     | 7784.77   | 23805.75  | 28920.78  | 27937.12  | 25957.42  | 7971.33   | 23232.58   | 4107.42     | 0.80373212  | 0.095170525 | 154511.04 | 142590.76                                                                   | Down                                                                                               | Adafon O5-Mus-musculus GN-Afon PE-1 Sv-3                                              |
| TUBB1   | QR1807    | 67        | 67        | 51904.86  | 60994.74  | 57284.15  | 63477.65  | 47547.28  | 56555.15  | 57676.11  | 57392.62  | 57392.62   | NA          | 0.803737773 | 0.09488535  | 55486.716 | 55117.077                                                                   | Down                                                                                               | Tubulin beta 1 chain O5-Mus-musculus GN-Tubb1 PE-1 Sv-1                               |
| TRIP1   | QK002-4   | 8         | 8         | 3636.53   | 4045.8    | 3636.53   | 4045.8    | 3636.53   | 4045.8    | 3636.53   | 4045.8    | 3636.53    | 4045.8      | 0.094827193 | 14293.524   | 1381.134  | Up                                                                          | Formin 4 of rho GTPase-activating protein 1 O5-Mus-musculus GN-Trip1                               |                                                                                       |
| ADAM23  | QR18V1-3  | 8         | 8         | 34575.88  | 43171.32  | 27637.75  | 43171.32  | 40411.12  | 46782.62  | 45065.75  | 35832.25  | 38609.5    | 12958.62    | 0.803877117 | 0.094810313 | 37595.398 | 35846.748                                                                   | Down                                                                                               | Ubiquitin-protein ligase 1 O5-Mus-musculus GN-Adam23                                  |
| IGSR    | QR1866    | 17        | 17        | 21179.59  | 38624.29  | 20918.41  | 88980.18  | 55782.35  | 68462.17  | 61224.76  | 49623.41  | NA         | 0.803882972 | 0.094807171 | 44534.764   | 49863.082 | Down                                                                        | Immunoglobulin superfamily member 8 O5-Mus-musculus GN-Igsr PE-1 Sv-2                              |                                                                                       |
| CDNA    | Q186W     | 7         | 7         | 39498.78  | 16428.57  | 12736.14  | 23646.86  | 12736.14  | 23646.86  | 23646.86  | 23646.86  | 23646.86   | 23646.86    | 0.094807171 | 44534.764   | 49863.082 | Down                                                                        | Immunoglobulin superfamily member 8 O5-Mus-musculus GN-Igsr PE-1 Sv-2                              |                                                                                       |
| PTP     | Q186W     | 7         | 7         | 39498.78  | 16428.57  | 12736.14  | 23646.86  | 12736.14  | 23646.86  | 23646.86  | 23646.86  | 23646.86   | 23646.86    | 0.094807171 | 44534.764   | 49863.082 | Down                                                                        | Immunoglobulin superfamily member 8 O5-Mus-musculus GN-Igsr PE-1 Sv-2                              |                                                                                       |
| EDT1    | QR0925-4  | 4         | 4         | 83245.45  | 70965.6   | 80369.25  | 40318     | 64012     | 61408.75  | 61408.75  | 61408.75  | 61408.75   | 61408.75    | 0.094807171 | 44534.764   | 49863.082 | Down                                                                        | Immunoglobulin superfamily member 8 O5-Mus-musculus GN-Igsr PE-1 Sv-2                              |                                                                                       |
| OPR1    | QR0925-4  | 14        | 14        | 20524.71  | 26266.14  | 18664     | 27399.29  | 31930.14  | 32071.93  | 31411.29  | 28365.64  | 34025.64   | 6011.14     | 0.80534263  | 0.093997842 | 50625.96  | 26377.128                                                                   | Up                                                                                                 | Formin 4 of rho GTPase-activating protein 44 O5-Mus-musculus GN-Op1                   |
| CLTN3   | QR0947    | 3         | 3         | 6115.67   | 9007      | 8659      | 9090.33   | 8985      | 12479.33  | 10243.67  | 4877.33   | 11884.67   | 4690.67     | 0.805284294 | 0.093759751 | 8371.4    | 8835.134                                                                    | Up                                                                                                 | Calsenectin-3 O5-Mus-musculus GN-Cltn3 PE-1 Sv-1                                      |
| HCW12   | QR068     | 1         | 1         | 1333      | 3340      | 3359      | 8086      | 2954      | 3830      | 3693      | 2767      | NA         | 0.805888989 | 0.09372386  | 28082.2     | 30825.25  | Down                                                                        | U3 ubiquitin-protein ligase HCW12 O5-Mus-musculus GN-Hcw12 PE-2 Sv-3                               |                                                                                       |
| CDNA    | Q186W     | 7         | 7         | 39498.78  | 16428.57  | 12736.14  | 23646.86  | 12736.14  | 23646.86  | 23646.86  | 23646.86  | 23646.86   | 23646.86    | 0.094807171 | 44534.764   | 49863.082 | Down                                                                        | Immunoglobulin superfamily member 8 O5-Mus-musculus GN-Igsr PE-1 Sv-2                              |                                                                                       |
| SLTM    | QR0825    | 1         | 1         | 27592     | 12774     | 11832     | 13238     | 17505     | 19665     | 14749     | 25510     | 10832      | NA          | 0.80612567  | 0.09395148  | 16588.2   | 17689                                                                       | Up                                                                                                 | SARF-like transcription modulator O5-Mus-musculus GN-Sltm PE-1 Sv-1                   |
| ACTG1   | PE3260    | 108       | 108       | 200380.32 | 248570.59 | 240161.78 | 265468.94 | 211556.72 | 246669.51 | 294660.77 | 218881.22 | 24036.61   | NA          | 0.80617669  | 0.093754515 | 233272.74 | 238519.57                                                                   | Up                                                                                                 | Actin, cytoplasmic 2 O5-Mus-musculus GN-Actg1 PE-1 Sv-1                               |
| MCU     | Q31UM5    | 1         | 1         | 1591      | 5556      | NA        | 25581     | 4613      | 11038     | 9200      | 7884      | NA         | 0.806268967 | 0.093136954 | 9318.75     | 7825.25   | Down                                                                        | Calcium uniporter protein, mitochondrial O5-Mus-musculus GN-Mcu PE-1 Sv-2                          |                                                                                       |
| ABP2    | QR0925-4  | 7         | 7         | 17023.2   | 125560.48 | 103335.71 | 62130.2   | 117540.57 | 103113.82 | 116565.48 | 111085.57 | 8880.29    | NA          | 0.806268967 | 0.093136954 | 9318.75   | 7825.25                                                                     | Down                                                                                               | Actin-binding protein 2 O5-Mus-musculus GN-Abp2 PE-1 Sv-1                             |
| BUPY3   | QR0304-3  | 2         | 2         | 14771     | 7388.5    | NA        | 44300.5   | 25744     | 25744     | 25744     | 25744     | 25744      | 25744       | 0.093007323 | 1938.875    | 16871.667 | Down                                                                        | Formin 3 of protein BUPY3 O5-Mus-musculus GN-Bupy3                                                 |                                                                                       |
| TOHML12 | Q550X1-4  | 12        | 12        | 25970     | 38040.67  | 23215.56  | 37758     | 30780.67  | 34777.11  | 34238     | 18268.67  | 41329.44   | 11725.78    | 0.807260661 | 0.092986208 | 29623.78  | 28068.1                                                                     | Down                                                                                               | Formin 4 of rho GTPase-activating protein 44 O5-Mus-musculus GN-Tohml12               |
| CEP170  | Q6A065-3  | 6         | 6         | 19120.33  | 19875.75  | 19482.5   | 18340.5   | 20211.33  | 18369.67  | 20419.83  | 5357.33   | 33363.17   | 42046.17    | 0.80734411  | 0.092317578 | 19456.32  | 18240.814                                                                   | Down                                                                                               | Formin 3 of centron protein of 170 kDa O5-Mus-musculus GN-Cep170                      |
| CEP170  | Q6A065-3  | 6         | 6         | 19120.33  | 19875.75  | 19482.5   | 18340.5   | 20211.33  | 18369.67  | 20419.83  | 5357.33   | 33363.17   | 42046.17    | 0.80734411  | 0.092317578 | 19456.32  | 18240.814                                                                   | Down                                                                                               | Formin 3 of centron protein of 170 kDa O5-Mus-musculus GN-Cep170                      |
| NUDT3   | QR1846    | 3         | 3         | 70859.67  | 61377.33  | 67566.67  | 49705.33  | 56119     | 56652     | 59504.67  | 44557     | 80641.67   | 73930.33    | 0.807673906 | 0.092763948 | 61165.6   | 63057.134                                                                   | Up                                                                                                 | Diphosphoinositol polyphosphate phosphohydrolase 1 O5-Mus-musculus GN-Nudt3 PE-1 Sv-1 |
| MDH2    | 126814.08 | 120847.51 | 101399.15 | 126208.78 | 125415.82 | 121884.91 | 101245.61 | 125370.29 | 135710.29 | 100434.78 | 118260.77 | 118260.77  | 118260.77   | 0.09262452  | 102317.87   | 118260.77 | Down                                                                        | Malate dehydrogenase, mitochondrial O5-Mus-musculus GN-Mdh2 PE-1 Sv-3                              |                                                                                       |
| ARHGGE7 | OR18W5-4  | 6         | 6         | 34788.6   | 48255.8   | 38870     | 709310.6  | 50201.8   | 55214     | 52143.8   | 27871.6   | 51128.8    | 45504.2     | 0.09605245  | 44354.76    | 4617.708  | Down                                                                        | Formin 6 of rho guanine nucleotide exchange factor 7 O5-Mus-musculus GN-Arhg7                      |                                                                                       |
| CDNA    | Q186W     | 7         | 7         | 39498.78  | 16428.57  | 12736.14  | 23646.86  | 12736.14  | 23646.86  | 23646.86  | 23646.86  | 23646.86   | 23646.86    | 0.094807171 | 44534.764   | 49863.082 | Down                                                                        | Immunoglobulin superfamily member 8 O5-Mus-musculus GN-Igsr PE-1 Sv-2                              |                                                                                       |
| MMP7    | QR0805    | 3         | 3         | 17533.33  | 15785.33  | 10190     | 24282.67  | 18167.33  | 22233.67  | 13747.46  | 35480.25  | 23110.33   | NA          | 0.80814576  | 0.092241573 | 5774.732  | 15941.085                                                                   | Down                                                                                               | 28S ribosomal protein S7, mitochondrial O5-Mus-musculus GN-Mmp7 PE-2 Sv-1             |
| MMP18A  | QR0985    | 2         | 2         | 52813.5   | 60802     |           |           |           |           |           |           |            |             |             |             |           |                                                                             |                                                                                                    |                                                                                       |

|          |          |    |    |           |           |           |           |           |           |           |           |           |             |             |             |           |           |                                                                                       |                                                                                                              |
|----------|----------|----|----|-----------|-----------|-----------|-----------|-----------|-----------|-----------|-----------|-----------|-------------|-------------|-------------|-----------|-----------|---------------------------------------------------------------------------------------|--------------------------------------------------------------------------------------------------------------|
| ATP6V1A1 | P05018   | 57 | 67 | 147469.72 | 127338.09 | 107769.61 | 99905.51  | 137764.91 | 114657.89 | 43180.77  | 106699.23 | 157756.96 | 91092.6     | 0.82071008  | 0.085089089 | 124048.17 | 120663.29 | Down                                                                                  | V-type protein ATPase subunit E 1 OS=Mus musculus GN=Atp6v1a1 PE=1 SV=2                                      |
| MRPS5    | Q09887   | 1  | 3  | 58650     | 72814.33  | 71384.67  | 56690     | 66173     | 69300     | 63042     | 53074     | 93568.33  | 27220       | 0.82130803  | 0.085493469 | 65022.74  | 62300.86  | Down                                                                                  | Z85 ribosomal protein S5, mitochondrial OS=Mus musculus GN=Mrps5 PE=2 SV=1                                   |
| OLGA2    | Q8H42    | 20 | 21 | 29584.67  | 34058.67  | 28013.74  | 27151.05  | 38922.05  | 32152.67  | 35214.35  | 25616.16  | 41360     | 2731.25     | 0.82133392  | 0.085380066 | 35053.63  | 32341.53  | Down                                                                                  | Disk large-associated protein 2 OS=Mus musculus GN=Olga2 PE=1 SV=2                                           |
| PHACTR1  | Q20238-3 | 10 | 10 | 31444     | 34184     | 4396.33   | 27587.87  | 37654.22  | 30678.33  | 26589.78  | 50119.44  | 22781.27  | 0.82135502  | 0.08504433  | 34043.02    | 33355.86  | Up        | OS=2 of Phosphatase and activator regulator 1 OS=Mus musculus GN=Phactr1 PE=1 SV=1    |                                                                                                              |
| EGUN1    | Q09175   | 1  | 1  | NA        | NA        | NA        | 1622      | 1553      | 1577      | 1070      | NA        | 1919      | NA          | 0.82188575  | 0.085188759 | 1587.5    | 1524.6653 | Down                                                                                  | Egl nine homolog 1 OS=Mus musculus GN=Egun1 PE=2 SV=2                                                        |
| MRP15    | Q09171   | 3  | 3  | 135949    | 127344    | 109076.33 | 186253    | 132633.33 | 106159.33 | 110638    | 133380    | 166283.33 | 31474       | 0.822150948 | 0.085048438 | 118683.53 | 111586.93 | Down                                                                                  | Z95 ribosomal protein L51, mitochondrial OS=Mus musculus GN=Mrp15 PE=2 SV=2                                  |
| PLP1     | Q19127   | 27 | 27 | 14460.79  | 120734    | 24555.56  | 22701.96  | 24031.96  | 19871.81  | 27017.59  | 4486.67   | 14881.186 | 20077.33    | 0.822150948 | 0.085048438 | 118683.53 | 111586.93 | Down                                                                                  | Protein-ubiquitin ligase receptor-related protein 1 OS=Mus musculus GN=Plp1 PE=1 SV=1                        |
| PCMT1    | Q23068-2 | 17 | 17 | 118054.18 | 95984.26  | 101103.27 | 109940.18 | 112263.18 | 127068.29 | 127378.29 | 123756.18 | 818841.27 | 818841.27   | 0.084543196 | 0.084543196 | 818841.27 | 110403.43 | Up                                                                                    | Inform 2 of Protein-Lysine-activated-5-subunit O-methyltransferase OS=Mus musculus GN=Pcmt1 PE=1 SV=1        |
| UBILA    | P21126   | 2  | 2  | 15975.5   | 22505.5   | 6547      | 45408.5   | 21119.5   | 30785     | 24308     | 9454      | 18320.5   | NA          | 0.823146414 | 0.084539688 | 22311.1   | 20991.875 | Up                                                                                    | Ubiquitin-like protein 4A OS=Mus musculus GN=Ubla PE=2 SV=1                                                  |
| CSNG5    | Q21M36   | 11 | 11 | 11225.89  | 21201.44  | 10506.67  | 61243     | 24561.33  | 37161.13  | 19615.44  | 12072.67  | 23421.78  | 4478        | 0.823146414 | 0.084539688 | 22311.1   | 20991.875 | Up                                                                                    | Chondroitin sulfate proteoglycan OS=Mus musculus GN=Csng5 PE=1 SV=2                                          |
| ZNR      | Q8H312   | 2  | 2  | 42724     | 47430     | 58731.5   | 2280      | 64747.3   | 54366     | 16574     | 26864.5   | 68860     | NA          | 0.823889923 | 0.084110861 | 49198.6   | 15660.625 | Up                                                                                    | Zinc finger RING-type domain OS=Mus musculus GN=Znr PE=1 SV=2                                                |
| SLC27A4  | Q31510   | 1  | 1  | 26931     | 10777     | NA        | 131654    | 43190     | 115125    | 109291    | NA        | 30060     | NA          | 0.824252109 | 0.083951441 | 51415.75  | 83802.167 | Up                                                                                    | Tubul and kn domain-containing protein kinase type 1 subunit alpha OS=Mus musculus GN=Slc27a4 PE=1 SV=1      |
| UBNL2    | Q8H65-2  | 20 | 20 | 26456.74  | 25501.21  | 14438.63  | 23755.58  | 30286     | 26327.79  | 31495.21  | 36222.1   | 37587     | 3258.21     | 0.82438975  | 0.084376555 | 24815.632 | 23288.748 | Down                                                                                  | Inform 2 of Actin-binding Ubl protein OS=Mus musculus GN=Ubnl2 PE=1 SV=1                                     |
| EHOD     | Q8E0P2   | 1  | 1  | NA        | NA        | NA        | 1860      | 616       | 922       | 1962      | NA        | NA        | NA          | 0.825478509 | 0.083295559 | 1238      | 1444      | Up                                                                                    | EH domain-containing protein 4 OS=Mus musculus GN=Ehod PE=1 SV=1                                             |
| PIGO1    | Q8D0P5   | 1  | 1  | 67944     | 105478    | 80964     | 97979     | 75749     | 105168    | 86574     | 47890     | 89954     | NA          | 0.825383094 | 0.083127027 | 85022.8   | 82346.5   | Down                                                                                  | Pagogen homolog 1 OS=Mus musculus GN=Pygo1 PE=1 SV=1                                                         |
| WARS1    | Q21029   | 8  | 8  | 7386.83   | 6361.38   | 7534.67   | 6993.5    | 7906      | 5992.17   | 5341.5    | 5679.67   | 6027.5    | 13720.33    | 0.823285202 | 0.083132804 | 7103.869  | 7483.874  | Up                                                                                    | Neural Wiskott-Aldrich syndrome protein OS=Mus musculus GN=Wars1 PE=1 SV=1                                   |
| PLXNA4   | Q8H0G2   | 7  | 7  | 10841.43  | 28168.57  | 14320.57  | 55519.86  | 23017.71  | 44178.29  | 45515     | 51337.57  | 18953.57  | 20938.86    | 0.083966643 | 0.083909075 | 26193.628 | 28564.658 | Up                                                                                    | PlxinA4 OS=Mus musculus GN=Plxn4 PE=1 SV=3                                                                   |
| GNB3     | Q61011   | 1  | 1  | 169776    | 210268    | 110412    | 293058    | 124731    | 248318    | 160781    | 93733     | 181919    | NA          | 0.825973661 | 0.083038031 | 181649    | 175713    | Down                                                                                  | Guanine nucleotide-binding protein G(I)/G(S)/G(T) subunit beta-3 OS=Mus musculus GN=Gnb3 PE=1 SV=2           |
| SODL1    | Q8E0P1   | 4  | 4  | 75511.5   | 71381     | 72742.75  | 46900.75  | 69785     | 62633     | 66910.5   | 69124.5   | 78732.25  | 48988       | 0.826130705 | 0.082951236 | 66884.2   | 65277.65  | Up                                                                                    | Stricalc domain-derived factor 2-like protein 1 OS=Mus musculus GN=Sodl1 PE=2 SV=2                           |
| TOMH     | Q8D0L1   | 2  | 2  | 21025.5   | 32034.5   | 15327     | 28845     | 55849.5   | 28345.5   | 23368     | 35384.5   | 15382     | NA          | 0.826200858 | 0.082910358 | 24616.5   | 2577.75   | Up                                                                                    | Tubul and kn domain-containing protein kinase type 1 subunit beta OS=Mus musculus GN=Tomh PE=1 SV=1          |
| GEPOX    | Q00061   | 1  | 1  | 48028     | 49260     | 66697     | 30770     | 51343     | 35142     | 48552     | 79496     | 48605     | NA          | 0.826308708 | 0.082603088 | 49179.5   | 51768.75  | Up                                                                                    | Glucone-6-phosphate 1-dehydrogenase X OS=Mus musculus GN=Geplx PE=1 SV=3                                     |
| VTI18    | Q8H384   | 4  | 4  | 5313.33   | 9238.67   | 1398      | 32679.33  | 14877.33  | 24301.33  | 22837.33  | 27709     | 7925.33   | NA          | 0.827209109 | 0.082479157 | 12701.332 | 14444.248 | Up                                                                                    | Vesicle transport through interaction with 1-SNAREs homolog 18 OS=Mus musculus GN=Vti18 PE=1 SV=1            |
| CSO1     | Q14013   | 1  | 1  | 71614     | 51918     | 23100     | 52981     | 81029     | 63341     | 52285     | 51622     | 75669     | 43435       | 0.827117339 | 0.082437727 | 56110.4   | 53270.4   | Down                                                                                  | CGO81 iron-sulfur domain-containing protein 3, mitochondrial OS=Mus musculus GN=Csol1 PE=1 SV=1              |
| PGM2     | Q21029   | 1  | 1  | 28467     | 36863     | 9136      | 118508    | 44460     | 64705     | 96668     | 28994     | 54118     | NA          | 0.827272316 | 0.082175018 | 47522.8   | 5216.25   | Up                                                                                    | Phosphoglucomutase 2 OS=Mus musculus GN=Pgm2 PE=1 SV=4                                                       |
| PRKB     | P68044   | 7  | 7  | 53972.14  | 77596.86  | 56266.86  | 118565.14 | 78510.57  | 105425.15 | 97652.43  | 62887.71  | 75600.86  | 22222.86    | 0.827764449 | 0.08209323  | 76082.314 | 72757.914 | Down                                                                                  | Protein kinase C beta type OS=Mus musculus GN=Prkb PE=1 SV=4                                                 |
| GSPT2    | P44625   | 3  | 3  | 58546     | 66937.33  | 93899.67  | 42490     | 48408.67  | 51435     | 48167.67  | 56874     | 70359     | 75092       | 0.828561528 | 0.081675209 | 57047.134 | 60375.334 | Up                                                                                    | Glutathione S-transferase P 2 OS=Mus musculus GN=Gsp2 PE=2 SV=2                                              |
| CBK      | Q64010-2 | 5  | 5  | 60751     | 80709.6   | 67246     | 55372.6   | 65666.6   | 73045.2   | 68627     | 60106     | 54896.6   | 0.828927367 | 0.081485481 | 61222.74    | 64474.7   | Up        | Inform 1 of Adaptor molecule crk OS=Mus musculus GN=CBK PE=1 SV=1                     |                                                                                                              |
| APB1     | P56112   | 8  | 8  | 281773.88 | 241864.25 | 24750.88  | 25512.88  | 24910.15  | 161084.12 | 101318    | 232762.33 | 349782.67 | 349782.67   | 0.828927367 | 0.081485481 | 61222.74  | 19898.117 | Down                                                                                  | cAMP-regulated phosphatase 13 OS=Mus musculus GN=Apb1 PE=1 SV=2                                              |
| SLC12A2  | Q31006-3 | 2  | 2  | 8488      | 8447.38   | 15247.67  | 42782.4   | 95310.25  | 95310.25  | 30934.62  | 30448.5   | 63825     | 2581.33     | 0.828927367 | 0.081485481 | 61222.74  | 19898.117 | Down                                                                                  | Inform 1 of Excitatory amino acid transporter 2 OS=Mus musculus GN=Slc12a2 PE=1 SV=1                         |
| CROCC    | Q8H400   | 12 | 12 | 29036.33  | 34612.17  | 19374.83  | 31952.33  | 33078.83  | 38874.42  | 32263.67  | 9285.33   | 36621.92  | 24256.33    | 0.828927367 | 0.081061171 | 29610.898 | 28260.334 | Up                                                                                    | Roosterin OS=Mus musculus GN=Crocc PE=1 SV=2                                                                 |
| DNAK11   | Q5U458   | 1  | 1  | 4202      | 7240      | 12990     | 4248      | 11506     | 8788      | NA        | 2966      | NA        | 0.830114959 | 0.080861676 | 8745        | 7753.33   | Down      | DnaK homolog subfamily c member 11 OS=Mus musculus GN=Dnak11 PE=2 SV=2                |                                                                                                              |
| ABRM2    | Q21029   | 5  | 18 | 27456.41  | 134208.82 | 33663.88  | 33663.88  | 33663.88  | 33663.88  | 33663.88  | 33663.88  | 33663.88  | 985.12      | 0.830268182 | 0.080861676 | 8745      | 7753.33   | Down                                                                                  | Inform 1 of Actin-binding Ubl protein OS=Mus musculus GN=Abm2 PE=1 SV=1                                      |
| LZHG08   | Q21029   | 2  | 2  | 38465     | 30488.5   | 34356     | 61015.5   | 53625     | 51681.5   | 47266     | NA        | NA        | 0.831402868 | 0.080837808 | 45508.8     | 49017.35  | Up        | 2-hydroxyglutaryl dehydrogenase, mitochondrial OS=Mus musculus GN=Lzhg08 PE=1 SV=1    |                                                                                                              |
| CSO2B8A  | Q5020D-3 | 12 | 12 | 12459.92  | 13981.25  | 12338.75  | 27272.33  | 19460.92  | 23615.25  | 23840.18  | 13831     | 22109.83  | 4464.75     | 0.832056621 | 0.080771119 | 16392.634 | 17368.982 | Up                                                                                    | Inform 3 of Girdin OS=Mus musculus GN=Cso2b8a PE=1 SV=1                                                      |
| ERC1     | Q099M1   | 23 | 23 | 28966.22  | 27465.57  | 22222.68  | 30945.17  | 29856.78  | 34720.4   | 33042.51  | 23811.04  | 38587.74  | 17077.57    | 0.832213322 | 0.079802352 | 27892.914 | 28737.46  | Up                                                                                    | ELKS/Rab6-interacting/CASK family member 1 OS=Mus musculus GN=Erc1 PE=1 SV=1                                 |
| FAM1134C | Q8C024   | 4  | 4  | NA        | 13307.33  | NA        | 4049.73   | 826.67    | 9648      | 1065      | NA        | 862.67    | NA          | 0.832444486 | 0.079844773 | 2200.7267 | 1735.2233 | Down                                                                                  | Protein FAM1134C OS=Mus musculus GN=Fam1134c PE=3 SV=1                                                       |
| PRKRA    | Q54114   | 54 | 54 | 64473.04  | 85728.66  | 75103.68  | 16009.83  | 16009.83  | 113300.88 | 97524.81  | 83147.19  | 71554.4   | 0.832444486 | 0.079844773 | 2200.7267   | 1735.2233 | Down      | Gastrin beta chain, non-erythropoietic 1 OS=Mus musculus GN=Prkra PE=1 SV=2           |                                                                                                              |
| BAP2B    | P61226   | 1  | 1  | 4712      | NA        | NA        | 14738     | 8853      | 12809     | 13541     | NA        | 4702      | NA          | 0.832502413 | 0.079614499 | 9434.333  | 10350.667 | Up                                                                                    | Ras-related protein Rap-2b OS=Mus musculus GN=Bap2b PE=1 SV=1                                                |
| APL1     | Q03157   | 5  | 5  | 10114.4   | 12096.6   | 6706      | 14680.2   | 11593.4   | 12463     | 12218     | 8260      | 14194.8   | 5859.8      | 0.832740475 | 0.079490326 | 11038.12  | 10058.104 | Down                                                                                  | Amyloid-like protein 1 OS=Mus musculus GN=Ap1 PE=1 SV=1                                                      |
| SHANK1   | Q37011   | 36 | 36 | 31628.9   | 37380.42  | 34751.44  | 28503.56  | 37343.97  | 30991.28  | 36860.61  | 28407.42  | 41626.78  | 2384.48     | 0.832786074 | 0.079461331 | 32901.666 | 32110.074 | Down                                                                                  | SH3 and family member repeat domains protein 1 OS=Mus musculus GN=Shank1 PE=1 SV=1                           |
| RAF12    | P44625   | 3  | 3  | 20071.6   | 30172.6   | 47867.4   | 72167.33  | 28912.4   | 42523.7   | 3887.4    | 39905.4   | 14808.8   | NA          | 0.832844512 | 0.079461331 | 32901.666 | 32110.074 | Down                                                                                  | Inform 1 of Excitatory amino acid transporter 2 OS=Mus musculus GN=RAF12 PE=1 SV=1                           |
| FAM171A2 | A2A609   | 12 | 12 | 30009.8   | 22249.1   | 19132.2   | 31610.6   | 37271.6   | 37271.6   | 19870.9   | 11646.8   | 9516.1    | 0.833339951 | 0.079273579 | 25971.21    | 27429.78  | Up        | Protein FAM171A2 OS=Mus musculus GN=Fam171a2 PE=1 SV=1                                |                                                                                                              |
| PPP2R1B  | Q21029   | 2  | 2  | 16117     | 13948     | 15747.5   | 31410.5   | 19806     | 22264     | 17394.5   | 4578      | 36741     | 22605       | 0.834823942 | 0.078405104 | 19404     | 20775.1   | Up                                                                                    | Serine/threonine protein phosphatase 2A 65 kDa regulatory subunit alpha OS=Mus musculus GN=Ppp2r1b PE=1 SV=2 |
| CAND1    | Q6Z038   | 6  | 6  | 11140.81  | 93843.8   | 8681.33   | 114115    | 18247.17  | 13121     | 30533.5   | 42175.3   | 20099     | NA          | 0.834952129 | 0.078116811 | 24009.132 | 21519.5   | Down                                                                                  | Cullin-associated NECD08-dissociated protein 1 OS=Mus musculus GN=Cand1 PE=2 SV=2                            |
| SLT16    | Q6414    | 1  | 1  | 644.4     | 1097.5    | 4140.2    | 11807.4   | 1342.4    | 1466.8    | 1158      | 1021.2    | NA        | 0.835114139 | 0.078116811 | 24009.132   | 21519.5   | Down      | Cellular alpha-actinin-4 OS=Mus musculus GN=Sl16 PE=1 SV=1                            |                                                                                                              |
| ATPS2    | Q8D0B2   | 25 | 25 | 181504.88 | 181792.36 | 198851.4  | 211480.08 | 189320.4  | 185068.08 | 176674.52 | 174540.32 | 185762.36 | 264193.92   | 0.835261033 | 0.078134901 | 192676.42 | 196660.64 | Up                                                                                    | ATP synthase subunit o, mitochondrial OS=Mus musculus GN=Atps2 PE=1 SV=1                                     |
| AC2F2    | Q8VWC8   | 6  | 6  | 16960.33  | 15460.83  | 17188.33  | 21919.33  | 17534.67  | 17375.67  | 17883.83  | 22045     | 19841.33  | 0.835303516 | 0.078073871 | 19252.698   | 19833.4   | Up        | Acyl-CoA synthetase family member 2, mitochondrial OS=Mus musculus GN=Ac2f2 PE=1 SV=1 |                                                                                                              |
| ACTG2    | P63288   | 59 | 59 | 307024.63 | 384727.36 | 366732.1  | 414800.12 | 329982.76 | 384205.26 | 466620.72 | 294266.51 | 338922.92 | 361029.61   | 0.835633693 | 0.077842674 | 361403.39 | 368845.23 | Up                                                                                    | Actin, gamma-enteric smooth muscle OS=Mus musculus GN=Actg2 PE=1 SV=1                                        |
| PRK12    | P61226   | 61 | 61 | 29947.75  | 35540.67  | 40726.33  | 414800.12 | 329982.76 | 384205.26 | 466620.72 | 294266.51 | 338922.92 | 361029.61   | 0.835633693 | 0.077842674 | 361403.39 | 368845.23 | Up                                                                                    | Actin, gamma-enteric smooth muscle OS=Mus musculus GN=Prk12 PE=1 SV=1                                        |
| EFHD1    | Q09175   | 1  | 1  | 7585      | 6625      | 6573      | 19407     | 5879      | 12071     | 7175      | NA        | 10025     | NA          | 0.835745692 | 0.077365699 | 9141.8    | 9757      | Up                                                                                    | EF-hand domain-containing protein D1 OS=Mus musculus GN=Efhd1 PE=1 SV=1                                      |
| CEND1    | Q8H053   | 22 | 22 | 8240.86   | 71319.59  | 712420.09 | 87773     | 77120.88  | 74281.32  | 78645.27  |           |           |             |             |             |           |           |                                                                                       |                                                                                                              |

|           |           |    |    |           |           |           |           |           |           |           |           |           |              |             |             |           |                                                                                               |                                                                                               |                                                                                                     |
|-----------|-----------|----|----|-----------|-----------|-----------|-----------|-----------|-----------|-----------|-----------|-----------|--------------|-------------|-------------|-----------|-----------------------------------------------------------------------------------------------|-----------------------------------------------------------------------------------------------|-----------------------------------------------------------------------------------------------------|
| COX8B     | P19536-2  | 33 | 33 | 176353.73 | 159932.27 | 167924.92 | 203030.33 | 187654.79 | 183407.97 | 142270.64 | 194228.97 | 143695.78 | 0.8545142701 | 0.088280678 | 178473.38   | 176053.04 | Down                                                                                          | Cytochrome c oxidase subunit 8B, mitochondrial OS-Musculus GN-CoX8b PE1 SV-1                  |                                                                                                     |
| ACTR2     | P61161    | 15 | 15 | 56442.87  | 85087.93  | 59397.4   | 163464.2  | 87376.33  | 18066.33  | 152695.47 | 46667.73  | 89940.47  | 3243.67      | 0.065492701 | 80623.746   | 86766.734 | Down                                                                                          | Actin-related protein 2 OS-Musculus GN-Actr2 PE1 SV-1                                         |                                                                                                     |
| OCNTR     | OCNTRB    | 12 | 12 | 46913.87  | 50075     | 53969.25  | 42395.08  | 59066.25  | 59221.92  | 58034.28  | 38809.08  | 70561.33  | 32106.25     | 0.858418407 | 50231.883   | 51644.882 | Down                                                                                          | Dentinin subunit 1 OS-Musculus GN-OCNTR PE1 SV-1                                              |                                                                                                     |
| EMC1      | EMC1M1-4  | 6  | 6  | 29804.33  | 29450     | 33501     | 39081.17  | 27543.63  | 33339     | 32188.37  | 45310     | 3501.33   | NA           | 0.856110495 | 27877.266   | 26273.625 | Down                                                                                          | Factor 1 of EUS/RAE-interacting/CASIT family member 1 OS-Musculus GN-Emc1                     |                                                                                                     |
| HMGCL     | P38600    | 7  | 7  | 26573.57  | 27329.29  | 31469.71  | 26812.57  | 29491.14  | 29627.71  | 105532.57 | 25513.57  | 40735.29  | 18041        | 0.856259257 | 25659.256   | 28993.628 | Down                                                                                          | Hydroxymethyltransferase/CoA lyase, mitochondrial OS-Musculus GN-Hmgcl PE1 SV-2               |                                                                                                     |
| TM6M4     | OC35857   | 2  | 2  | 39095     | 62329     | 25160     | 163339    | 62124     | 123776    | 100059.25 | 22613     | 59823.1   | NA           | 0.856423293 | 70379.4     | 76567.875 | Down                                                                                          | Putative mitochondrial inner membrane translocase subunit TM6M4 OS-Musculus GN-Tm6m4 PE1 SV-2 |                                                                                                     |
| LOC71     | OC3585    | 2  | 2  | 5795.45   | 5795.45   | 1333      | 9589      | 6077      | 1333      | 1047      | 6451.33   | NA        | 0.856423293  | 5417.2      | 5417.2      | Down      | Putative mitochondrial inner membrane translocase subunit LOC71 OS-Musculus GN-LOC71 PE1 SV-2 |                                                                                               |                                                                                                     |
| CNPF2     | OCNPF2-1  | 3  | 3  | 7532.33   | 10472     | 7537      | 7546.67   | 7177      | 8875.33   | 8562.67   | 1735      | 10022.33  | NA           | 0.85670795  | 7593        | 7703.58   | Down                                                                                          | Neurofilin 2 of protein cationic homologs 1 OS-Musculus GN-Cnfp2                              |                                                                                                     |
| SRGN1     | OC9QW6    | 82 | 82 | 59325.18  | 51582.7   | 51299.72  | 67399.91  | 69904.56  | 68083.8   | 75396.65  | 47804.68  | 80655.19  | 32362.57     | 0.857455055 | 606678327   | 62622.414 | 63400.578                                                                                     | Down                                                                                          | SRC kinase signaling inhibitor 1 OS-Musculus GN-Srgn1 PE1 SV-2                                      |
| NCAM2     | OC3136    | 13 | 13 | 19436.69  | 54090.54  | 54090.54  | 128096.92 | 48024.15  | 83831.15  | 91568.82  | 41909.62  | 48543.47  | 10079.08     | 0.857555038 | 50736.36    | 55186.462 | Down                                                                                          | Neural cell adhesion molecule 2 OS-Musculus GN-NCam2 PE-2 SV-1                                |                                                                                                     |
| CAMK2N1   | OC6W3F9   | 3  | 3  | 64845.31  | 49098.67  | 71866.67  | 58347     | 57100     | 10466.67  | 60333.67  | 18557     | 109879    | 47314.67     | 0.858461963 | 60248.54    | 57536.204 | Down                                                                                          | Calcium/calmodulin-dependent protein kinase II inhibitor 1 OS-Musculus GN-Camk2n1 PE1 SV-1    |                                                                                                     |
| RMS2      | OC9Q27-3  | 3  | 3  | 1382.67   | 8570      | NA        | NA        | 14172.33  | 9143.33   | 8572.38   | NA        | 3505.67   | NA           | 0.858703173 | 749         | 7927.13   | Down                                                                                          | Regulator of G-protein signaling 2 OS-Musculus GN-Rms2                                        |                                                                                                     |
| GNB1      | PE6274    | 55 | 55 | 77820.33  | 88620.67  | 6823.62   | 82541.92  | 113845.27 | 90747.33  | 104686.88 | NA        | 44595.9   | 0.860601584  | 0.860601584 | 94528.192   | 90665.264 | Down                                                                                          | Guanine nucleotide-binding protein G(I)/G(S)/G(T) subunit beta-1 OS-Musculus GN-Gnb1 PE1 SV-3 |                                                                                                     |
| VP516     | OC92Q4    | 1  | 1  | NA        | 2942      | NA        | NA        | 2325      | 8835      | 9118      | NA        | 3238      | NA           | 0.859837819 | 5437        | 6063.6667 | Down                                                                                          | Vacuolar protein sorting-associated protein 16 homolog OS-Musculus GN-Vp516 PE1 SV-3          |                                                                                                     |
| ANLN      | OC8298    | 1  | 1  | 3011      | 5178      | 1841      | 5220      | 3666      | 3553      | 3111      | NA        | 2248      | NA           | 0.859889019 | 37832       | 3570.6667 | Down                                                                                          | Actin-binding protein anillin OS-Musculus GN-Anln PE1 SV-2                                    |                                                                                                     |
| SRU2      | OC8291    | 18 | 18 | 59553.94  | 65459.37  | 5772.25   | 4547.32   | 61947.88  | 5320.08   | 61947.88  | 55571.84  | 45798.69  | 0.860060602  | 0.860060602 | 57994.414   | 56998.578 | Down                                                                                          | SRU2 ribosomal protein L30-like OS-Musculus GN-Sru2 PE1 SV-1                                  |                                                                                                     |
| BARB3     | PE6283    | 5  | 5  | 156512    | 29080.2   | 13329     | 72603.8   | 30982.2   | 43446.6   | 31406     | NA        | 34573.4   | NA           | 0.860797326 | 32517.44    | 34707.333 | Down                                                                                          | Ras-related protein Rab-3C OS-Musculus GN-Barb3 PE1 SV-1                                      |                                                                                                     |
| DOX39B    | OC2N15    | 2  | 2  | 14275     | 19586     | NA        | 44473     | 19837     | 13295.5   | 13406     | NA        | NA        | NA           | 0.864775118 | 25452.75    | 22307.75  | Down                                                                                          | Spliceosome RNA helicase Ddx39b OS-Musculus GN-Dox39b PE1 SV-1                                |                                                                                                     |
| RMS1      | OC9M95-7  | 24 | 24 | 41430.27  | 47118.15  | 40671.15  | 46906.5   | 55538.6   | 52996.2   | 56711.5   | 45739.85  | 63936.6   | 19902.85     | 0.86150339  | 0.86150339  | 46332.56  | 47815.36                                                                                      | Down                                                                                          | Factor 7 of Regulating synaptic membrane exocytosis protein 1 OS-Musculus GN-Rms1                   |
| SPF       | OC6405    | 3  | 3  | 21978.73  | 23979.33  | 26453     | 26620.33  | 23482     | 25959.33  | 10959.33  | 25792     | NA        | 0.861691892  | 0.861691892 | 25377.864   | 20230.72  | Down                                                                                          | Seropinectin reductase OS-Musculus GN-Spf PE1 SV-1                                            |                                                                                                     |
| GOLGA1    | OC9CW79   | 1  | 1  | 10663     | 12832     | NA        | 9406      | 12710     | 12127     | 7493      | NA        | 16153     | NA           | 0.862513811 | 0.862423392 | 11417.75  | 11924.333                                                                                     | Down                                                                                          | Golgin subfamily A member 1 OS-Musculus GN-Golga1 PE1 SV-2                                          |
| CAPN1     | OC35350   | 1  | 1  | NA        | 3034      | NA        | 15490     | 3892      | 9103      | 7435      | NA        | NA        | 0.862656239  | 0.864162187 | 7472        | 8269      | Down                                                                                          | Calpain-1 catalytic subunit OS-Musculus GN-Capn1 PE1 SV-1                                     |                                                                                                     |
| CDH4      | P39310    | 1  | 1  | 7858      | 7306      | 5832      | 12294     | 6864      | 9567      | 9777      | 2350      | 5304      | NA           | 0.864176371 | 6310.8      | 6749.1    | Down                                                                                          | Cadherin-4 OS-Musculus GN-CDH4 PE-2 SV-1                                                      |                                                                                                     |
| AFG1L1    | OC2047    | 1  | 1  | 13867     | 18178     | NA        | 4714      | 15450     | 31080     | 24713     | 1939      | 19999     | NA           | 0.86490179  | 23702.25    | 23264     | Down                                                                                          | AFG1-like protein 1 OS-Musculus GN-Afg1l1 PE-2 SV-1                                           |                                                                                                     |
| INPK1     | OC71095   | 1  | 1  | 6031      | 6916      | 9875      | 13968     | 18322     | 19685     | 13844     | 1984      | 9322      | NA           | 0.863134968 | 0.863810714 | 15004.4   | 13949.667                                                                                     | Down                                                                                          | Protein lipinapok OS-Musculus GN-Inpk1 PE1 SV-1                                                     |
| SLC44A    | OC8343-2  | 4  | 4  | 36894.5   | 68230.25  | 14846.5   | 123514.52 | 7531.5    | 79638     | 71424.25  | 39952.25  | 49158.5   | NA           | 0.863719266 | 63761.4     | 60041.625 | Down                                                                                          | isoform 2 of Electrogenic sodium bicarbonate cotransporter 1 OS-Musculus GN-Slc44a            |                                                                                                     |
| MOG       | OC61885   | 2  | 2  | 4000      | 28835.5   | 4861.5    | 116831.5  | 41509     | 72161     | 47667     | 11029     | 8485      | NA           | 0.863634548 | 39411.9     | 34835.1   | Down                                                                                          | Myelin oligodendrocyte glycoprotein OS-Musculus GN-Mog PE1 SV-1                               |                                                                                                     |
| LOC72     | OC9PD3-3  | 8  | 8  | 19676.88  | 20989.62  | 14440.78  | 42231.38  | 38728.88  | 37596.38  | 34762.12  | 33114.5   | 7657.4    | NA           | 0.863373867 | 28417.402   | 28874.674 | Down                                                                                          | isoform 3 of Serine/threonine protein kinase SLC42 OS-Musculus GN-LOC72                       |                                                                                                     |
| AP2E      | OC92E     | 12 | 12 | 130235.08 | 43287.38  | 13578.36  | 57847     | 24178     | 49572.93  | 14363.38  | 34701     | 4352      | NA           | 0.863947316 | 34942.161   | 34741.75  | Down                                                                                          | Adaptor 2 of Arp2/3 complex OS-Musculus GN-AP2E PE1 SV-1                                      |                                                                                                     |
| CRED1     | OC91707   | 5  | 5  | 14447     | 18806.6   | 6561.4    | 45047.2   | 30482     | 38731.8   | 40351.6   | 14339.8   | 2842.2    | 3086.4       | 0.864557499 | 23083.64    | 24832.32  | Down                                                                                          | Cytidine-rich with EGF-like domain protein 1 OS-Musculus GN-Cred1 PE-2 SV-1                   |                                                                                                     |
| ABLIM2    | OC88545-1 | 21 | 21 | 26416.45  | 26376.5   | 14418.85  | 30573.55  | 29915.55  | 40012.1   | 18809.25  | 37265.95  | 2095.3    | 0.865012069  | 0.862888252 | 50655.265   | 24395.83  | Down                                                                                          | isoform 2 of Actin-binding LIM protein 2 OS-Musculus GN-Ablim2                                |                                                                                                     |
| SNRPB     | OC9170    | 4  | 4  | 2214      | 3160.67   | 3520      | 3520      | 3520      | 3520      | 3520      | 3520      | 3520      | NA           | 0.865270702 | 3708        | 468       | Down                                                                                          | Amyloid beta A4 precursor protein-binding protein 1 OS-Musculus GN-Snrpb                      |                                                                                                     |
| SNRPD     | OC9170    | 3  | 3  | 3624      | 34178.33  | 6856.33   | 49080.33  | 25154.67  | 41901.67  | 42322     | 16149.67  | 4338      | NA           | 0.865667493 | 21818.72    | 22760.338 | Down                                                                                          | isoform 2 of Spliceosome protein 1 OS-Musculus GN-Snrpd PE1 SV-1                              |                                                                                                     |
| PSD3      | OC2P07D-1 | 14 | 14 | 99938.39  | 89938.39  | 130006.49 | 79548.79  | 97458.79  | 67547     | 104619    | 104619    | 121447.57 | 63272.43     | 0.867144883 | 100468.05   | 98316.442 | Down                                                                                          | isoform 3 of PI and SEK domain-containing protein 3 OS-Musculus GN-Psd3                       |                                                                                                     |
| CAMK2G    | OC93273-3 | 26 | 26 | 54521.12  | 78711.96  | 45222.72  | 138641.73 | 81727.38  | 98886.19  | 106099.23 | 58852.27  | 67639.92  | 50272.15     | 0.86720314  | 0.861879318 | 70955.02  | 76349.952                                                                                     | Down                                                                                          | isoform 3 of Calcium/calmodulin-dependent protein kinase type I subunit gamma OS-Musculus GN-Camk2g |
| SLC12A    | P43006    | 20 | 20 | 14354.45  | 34078     | 14116.6   | 10880     | 8898.2    | 67709.4   | 24984.4   | 26762.8   | 94974.8   | NA           | 0.867368319 | 40661.058   | 47134.142 | Down                                                                                          | isoform 2 of TMM1-like protein 2 OS-Musculus GN-Slc12a PE1 SV-1                               |                                                                                                     |
| CDK1      | OC9248    | 42 | 42 | 3         | 21814.93  | 14775.41  | 20918.33  | 72315.93  | 27453.93  | 14471.93  | 28467     | 14835.73  | NA           | 0.867491983 | 27020.98    | 28419.118 | Down                                                                                          | isoform 2 of Arp2/3-actin-binding protein GDI1 OS-Musculus GN-CDK1 PE1 SV-1                   |                                                                                                     |
| CNK1D     | OC9Q28-2  | 3  | 3  | 19506.67  | 36138     | 13380.67  | 33204.33  | 37515     | 36994     | 38556.33  | 12687     | 49129.67  | 10290.33     | 0.868189479 | 0.861358481 | 27668.394 | 29531.466                                                                                     | Down                                                                                          | isoform 2 of Casein kinase I isoform delta OS-Musculus GN-Cnk1d                                     |
| BCR       | OC6P41    | 4  | 4  | 15445     | 17692.25  | 44738.25  | 10576.25  | 14895.5   | 13800.25  | 32813.75  | 16139.75  | NA        | 0.86110095   | 0.86110095  | 20666.35    | 25917.063 | Down                                                                                          | Breakpoint cluster region protein OS-Musculus GN-Bcr PE1 SV-1                                 |                                                                                                     |
| PPM1E     | OC8V85    | 1  | 1  | 31394     | 28760     | 67622     | 37258     | 32932     | 49935     | 38388     | 24294     | 54032     | NA           | 0.868681838 | 0.861064273 | 3992.2    | 41654.75                                                                                      | Down                                                                                          | Protein phosphatase methyltransferase 1 OS-Musculus GN-Ppm1e PE1 SV-5                               |
| PSD2      | OC912     | 7  | 7  | 49012.15  | 15150     | 9642      | 4112      | 9642      | 9642      | 9642      | 9642      | 9642      | NA           | 0.868681838 | 0.868681838 | 15504.4   | 15504.4                                                                                       | Down                                                                                          | isoform 2 of Arp2/3-actin-binding protein GDI1 OS-Musculus GN-PSD2                                  |
| PSD1      | PE6283    | 7  | 7  | 47095.71  | 48407.14  | 43335.57  | 73879.86  | 45267.14  | 64781.86  | 49385.71  | 37728.57  | 56934     | 39244.29     | 0.869096394 | 0.869096394 | 50859.081 | 49525.288                                                                                     | Down                                                                                          | isoform 2 of Casein kinase I isoform delta OS-Musculus GN-PSD1                                      |
| CBT1      | OC91C2    | 1  | 1  | 1017      | 2597      | NA        | 1447      | 2135      | 680       | NA        | NA        | 2526      | NA           | 0.869105314 | 1799        | 1601      | Down                                                                                          | Protein chibby homolog 1 OS-Musculus GN-Cbt1 PE1 SV-1                                         |                                                                                                     |
| TM6M12    | OC5K91-2  | 15 | 15 | 20980.75  | 24821.17  | 18690.17  | 30706.08  | 24869     | 28624.25  | 28252.75  | 15443.08  | 33178.75  | 10483.67     | 0.869455118 | 0.869186331 | 24031.434 | 23195.1                                                                                       | Down                                                                                          | isoform 2 of TMM1-like protein 2 OS-Musculus GN-Tm6m12                                              |
| MLL       | OC912     | 2  | 2  | 5683      | 7139      | NA        | 471       | 4120      | 9642      | 9125      | 4195      | NA        | NA           | 0.869455118 | 5421.48     | 4239      | Down                                                                                          | isoform 2 of Arp2/3-actin-binding protein GDI1 OS-Musculus GN-MLL PE1 SV-1                    |                                                                                                     |
| CASKIN1   | OC9P9K8-4 | 5  | 5  | 27844     | 27889     | 23536     | 47994.4   | 21572.4   | 32229.8   | 35937.2   | 24805.2   | 28643.8   | 26636.6      | 0.869726629 | 0.859100667 | 28767.16  | 29653.52                                                                                      | Down                                                                                          | isoform 4 of Caskin 1 OS-Musculus GN-Caskin1                                                        |
| HMGGA1    | P17095    | 5  | 5  | 47913.5   | 18377.5   | 25866     | 10642.5   | 26210.5   | 16808     | 17447.25  | 29000     | 23477.25  | 36173.5      | 0.872692095 | 0.872692095 | 25802     | 24959.12                                                                                      | Down                                                                                          | High mobility group protein HMGV/HMGV-1 OS-Musculus GN-Hmgga1 PE1 SV-4                              |
| KS2       | OC9VU2    | 2  | 2  | 3799      | 2513      | 1374      | 5666      | 4588.5    | 4556.5    | 3742      | NA        | 14345.4   | NA           | 0.873271868 | 0.858850535 | 34485.8   | 3244.333                                                                                      | Down                                                                                          | kinase suppressor of Ras 2 OS-Musculus GN-Ks2 PE-2 SV-2                                             |
| LOC7234   | OC9P28    | 49 | 49 | 20736.17  | 227414.17 | 195233    | 198561.5  | 19561.5   | 22946.5   | 179702    | 22946.5   | 131862.73 | 191461.73    | 0.873271868 | 0.873271868 | 213661.73 | 213661.73                                                                                     | Down                                                                                          | isoform 2 of Arp2/3-actin-binding protein GDI1 OS-Musculus GN-LOC7234                               |
| ABLIM1    | OC9K4G5-3 | 10 | 10 | 19964.5   | 25473.7   | 20355.6   | 21718.8   | 20603.3   | 24175.5   | 20894.2   | 31568.8   | 81381     | 0.873718512  | 0.868528462 | 27552.3     | 21993.22  | Down                                                                                          | isoform 3 of Actin-binding LIM protein 1 OS-Musculus GN-Ablim1                                |                                                                                                     |
| ABLIM2    | OC9K4F8   | 1  | 1  | 25273     | 24182     | 16745     | 25333     | 15943     | 23949     | 16693     | 19591     | NA        | 0.873727727  | 0.858517933 | 21495.2     | 22031     | Down                                                                                          | Cytochrome b-c1 complex subunit 10 OS-Musculus GN-Ablim2 PE1 SV-2                             |                                                                                                     |
| SSRBL1    | OC8W22    | 2  | 2  | 27278     | 28595     | 19023     | 15049     | 22886     | 19741.5   | 22913.5   | 12502     | 23168     | 2782         | 0.874307472 | 0.858324251 | 20696.3   | 21292.4                                                                                       | Down                                                                                          | Calcium-responsive transactivator OS-Musculus GN-SSRbl1 PE1 SV-1                                    |
| CNRM1     | OC9K4F5-3 | 3  | 3  | 8551.67   | 14908     | NA        | 10222.67  | 14908     | 14908     | 14908     | 14908     | 14908     | NA           | 0.874307472 | 0.858324251 | 19861.443 | 19861.443                                                                                     | Down                                                                                          | isoform 3 of Dyrainin-1-like protein OS-Musculus GN-CNRM1                                           |
| OC9K4F5-3 | OC9K4F5-3 | 3  | 3  | 8551.67   | 14908     | NA        | 10222.67  | 14908     | 14908     | 14908     | 14908     | 14908     | NA           | 0.874307472 | 0.858324251 | 19861.443 | 19861.443                                                                                     | Down                                                                                          | isoform 3 of Dyrainin-1-like protein OS-Musculus GN-CNRM1                                           |
| ADRB8     | OC8Q78    | 9  | 9  | 16179.11  | 46465.56  | 17433.78  | 54570.67  | 47719.    |           |           |           |           |              |             |             |           |                                                                                               |                                                                                               |                                                                                                     |

|         |          |     |     |           |           |           |           |           |           |           |           |           |            |             |             |           |           |                                                  |                                                                                          |
|---------|----------|-----|-----|-----------|-----------|-----------|-----------|-----------|-----------|-----------|-----------|-----------|------------|-------------|-------------|-----------|-----------|--------------------------------------------------|------------------------------------------------------------------------------------------|
| KCNMA2  | PE3A14   | 1   | 1   | 2053      | 6057      | NA        | 8939      | 5731      | 4848      | 7479      | NA        | 3617      | NA         | 0.88980433  | 0.051057483 | 5695      | 5453333   | Down                                             | Potassium voltage-gated channel subfamily A member 2 OS=Mus musculus GN-Kcnma2 PE=1 Sv=1 |
| CNKR2   | OR89A9   | 13  | 13  | 16100     | 18682     | 1073792   | 20481.31  | 23471.38  | 23023.77  | 24881.54  | 16530     | 18573.31  | 8897.46    | 0.8898113   | 0.05020269  | 17894.538 | 18399.216 | Down                                             | Connector enhancer of kinase suppressor of ras 2 OS=Mus musculus GN-Cnkr2 PE=1 Sv=1      |
| CADHA   | OR89A6   | 4   | 1   | 31661.12  | 36715.36  | 39158     | 54105.86  | 39334.62  | 52336     | 4597.75   | 44515.12  | 42945.6   | 18552.62   | 0.89051524  | 0.05035854  | 38995.348 | 40883.988 | Down                                             | Cell adhesion molecule 4 OS=Mus musculus GN-Cadha PE=1 Sv=1                              |
| RABEP2  | Q12WVG-2 | 1   | 1   | 5560      | 1167      | NA        | 1100      | 7633      | 2380      | 2380      | NA        | 4782      | 1381       | 0.89118805  | 0.05035854  | 38995.348 | 40883.988 | Down                                             | Cell adhesion molecule 4 OS=Mus musculus GN-Cadha PE=1 Sv=1                              |
| RABP8   | Q77K83-3 | 2   | 2   | 73523.5   | 7557.5    | 2629      | 105.35    | 7592.5    | 9079.5    | 8872      | 4108      | 8251      | 4514       | 0.89126072  | 0.05002833  | 7133.3    | 6892.5    | Down                                             | Formin 3 OS=Mus musculus GN-Rabp8 PE=1 Sv=1                                              |
| SLC44A  | OR8343   | 4   | 7   | 22661.57  | 54335.14  | 8483.71   | 90549.71  | 50890.43  | 56688     | 52663.29  | 22829.86  | 39398.29  | NA         | 0.89126684  | 0.049992327 | 43622.112 | 41317.36  | Down                                             | Electrogenic sodium bicarbonate cotransporter 1 OS=Mus musculus GN-Slc44a PE=1 Sv=1      |
| CHIBBP8 | Q12WV3   | 7   | 7   | 24691.29  | 197075.29 | 72301.29  | 143701.79 | 22017.29  | 22017.29  | 25163.29  | 48911.14  | 257.158   | 13170.71   | 0.89126684  | 0.049992327 | 43622.112 | 41317.36  | Down                                             | 5'UT domain-binding protein 1 OS=Mus musculus GN-Chibbp8 PE=1 Sv=1                       |
| DAGL    | Q621A5   | 2   | 2   | 131432.5  | 100847    | 198030.5  | 144032    | 126047.5  | 144330    | 126047.5  | 144330    | 126047.5  | 144330     | 0.89126684  | 0.049992327 | 43622.112 | 41317.36  | Down                                             | Diacylglycerol 1 OS=Mus musculus GN-Dagl PE=1 Sv=1                                       |
| CHD1    | Q20VKA   | 4   | 4   | 27555.75  | 35488.25  | 11862.25  | 87253     | 30945.5   | 55630.5   | 56796.75  | 12038.75  | 25457.5   | NA         | 0.89270292  | 0.04920339  | 39841.5   | 37480.873 | Down                                             | DH domain-containing protein 1 OS=Mus musculus GN-Chd1 PE=1 Sv=1                         |
| NUP127  | Q5Z1E7-2 | 2   | 2   | 12662     | 18978.5   | 9523      | 27742.5   | 11563.5   | 23909     | 2599      | 7328      | 30261     | NA         | 0.89270871  | 0.04920339  | 39841.5   | 37480.873 | Down                                             | Formin 3 OS=Mus musculus GN-Chd1 PE=1 Sv=1                                               |
| AHA1    | OR89B4   | 4   | 4   | 35311.67  | 56125.67  | 23401.31  | 51433.3   | 50868.3   | 56742.67  | 12709     | 21592.67  | 57256.31  | 26782.67   | 0.89270871  | 0.04920339  | 39841.5   | 37480.873 | Down                                             | Formin 3 OS=Mus musculus GN-Chd1 PE=1 Sv=1                                               |
| SVN1    | OR89B5   | 107 | 107 | 110291.93 | 97864.32  | 92786.68  | 109066.67 | 91056.15  | 110870.42 | 100134.77 | 85414.44  | 102129.95 | 98942.48   | 0.89270871  | 0.04920339  | 39841.5   | 37480.873 | Down                                             | Formin 3 OS=Mus musculus GN-Chd1 PE=1 Sv=1                                               |
| SGT     | PE0001   | 6   | 6   | 85152     | 39945.2   | 37824.2   | 38782.2   | 31799.2   | 36081.8   | 51115.6   | 48565.6   | 74522.7   | 8934584.78 | 0.89352572  | 0.048912668 | 54270.066 | 42860.864 | Down                                             | Formin 3 OS=Mus musculus GN-Chd1 PE=1 Sv=1                                               |
| EEF1A1  | P10126   | 52  | 52  | 109134.88 | 109387    | 132744.72 | 122905.48 | 101108.4  | 106160.31 | 111566.29 | 14223.08  | 106811.19 | 124805.31  | 0.893796159 | 0.048741619 | 115037.91 | 116071.94 | Down                                             | Formin 3 OS=Mus musculus GN-Chd1 PE=1 Sv=1                                               |
| HN1     | PR9725   | 4   | 4   | 27703     | 41517.5   | 16256.5   | 30331     | 23864.5   | 35079     | 34810.25  | 18010.25  | 14474.75  | 28734.5    | 0.894881914 | 0.048741619 | 115037.91 | 116071.94 | Down                                             | Formin 3 OS=Mus musculus GN-Chd1 PE=1 Sv=1                                               |
| FLC17   | Q5G979   | 6   | 6   | 8355.17   | 16132.74  | 8016.67   | 5233.17   | 23350.67  | 33122     | 42016.67  | 5181.83   | 15242.5   | NA         | 0.894902849 | 0.048722653 | 7142.003  | 22931.158 | Down                                             | Formin 3 OS=Mus musculus GN-Chd1 PE=1 Sv=1                                               |
| MRP19   | Q80D38   | 4   | 4   | 30845     | 34029.5   | 30974.75  | 33557.5   | 28173.25  | 40091.75  | 38373.5   | 38220     | 35647.75  | 5071.25    | 0.895019043 | 0.048767724 | 33136     | 32280.85  | Down                                             | Formin 3 OS=Mus musculus GN-Chd1 PE=1 Sv=1                                               |
| AIMP2   | Q80D10   | 2   | 2   | NA        | NA        | NA        | 2951.5    | 1541      | 2457.5    | 1889      | NA        | NA        | 2028.5     | 0.895019043 | 0.048767724 | 33136     | 32280.85  | Down                                             | Formin 3 OS=Mus musculus GN-Chd1 PE=1 Sv=1                                               |
| IMMT    | OR84C8-5 | 63  | 63  | 56463     | 70529.38  | 44041.4   | 113604.02 | 76428.43  | 88405.54  | 91755.97  | 62755.95  | 72001.88  | 41749.81   | 0.89542698  | 0.047952597 | 75813.246 | 73373.775 | Down                                             | Formin 3 OS=Mus musculus GN-Chd1 PE=1 Sv=1                                               |
| IMMT    | OR84C8   | 64  | 64  | 56567.3   | 69440.31  | 43353.25  | 129612.77 | 75728.11  | 96915.62  | 90401.2   | 61735.39  | 70999.45  | 42097.47   | 0.895715237 | 0.047811552 | 74570.148 | 72338.626 | Down                                             | Formin 3 OS=Mus musculus GN-Chd1 PE=1 Sv=1                                               |
| EMC3    | Q59003   | 1   | 1   | 16735     | 61749     | 12325     | 270345    | 64957     | 129977    | 136050    | 52997     | 48610     | NA         | 0.896274751 | 0.047558838 | 85408.2   | 92622     | Down                                             | Formin 3 OS=Mus musculus GN-Chd1 PE=1 Sv=1                                               |
| FKBP8   | Q35465   | 14  | 14  | 22886.85  | 30582.08  | 16508.31  | 32114.77  | 26576.77  | 34913.41  | 33511.54  | 14223.08  | 33507.15  | 15486.69   | 0.897216281 | 0.047102854 | 27130.56  | 26238.354 | Down                                             | Formin 3 OS=Mus musculus GN-Chd1 PE=1 Sv=1                                               |
| CAMK2A  | P11728-2 | 23  | 23  | 21179.18  | 25109.95  | 23309.36  | 42488.36  | 25004.73  | 30261.05  | 30538.86  | 27481.32  | 23341.95  | 23491.18   | 0.89761696  | 0.047016966 | 25700.316 | 27031.872 | Down                                             | Formin 3 OS=Mus musculus GN-Chd1 PE=1 Sv=1                                               |
| RP24    | PE2449-3 | 8   | 8   | 94835.12  | 114290.12 | 108868.75 | 89572.75  | 88570.38  | 91099.5   | 10326.12  | 68624.62  | 131599    | 109001.88  | 0.89761696  | 0.046880579 | 99227.424 | 107990.22 | Down                                             | Formin 3 OS=Mus musculus GN-Chd1 PE=1 Sv=1                                               |
| BDH1    | Q80D00   | 13  | 13  | 36075.69  | 39591.08  | 34155.08  | 50028.38  | 34459.85  | 46650.77  | 45064.66  | 39679.92  | 41279.92  | 83797.38   | 0.897745347 | 0.046873747 | 40627.016 | 41460.09  | Down                                             | D-beta-hydroxybutyrate dehydrogenase, mitochondrial OS=Mus musculus GN-Bdh1 PE=1 Sv=1    |
| NBNX1   | Q5G986   | 1   | 1   | 51008     | 81149     | 116785    | 88878     | 60361     | 77999     | 73394     | 72515     | 102167    | NA         | 0.89782412  | 0.046880731 | 78716.6   | 81518.75  | Down                                             | Neurotensin 1 OS=Mus musculus GN-Nbnx1 PE=1 Sv=1                                         |
| SNAP29  | PE0891   | 12  | 12  | 2821.5    | 30558     | 20177.67  | 22887.33  | 27947     | 27628.83  | 27628.83  | 27027.92  | 3310      | 3310       | 0.89782412  | 0.046880731 | 78716.6   | 81518.75  | Down                                             | Neurotensin 1 OS=Mus musculus GN-Nbnx1 PE=1 Sv=1                                         |
| LTJ52   | Q12WV3   | 9   | 9   | 12921.3   | 11580.33  | 12921.3   | 11580.33  | 12921.3   | 11580.33  | 12921.3   | 11580.33  | 12921.3   | 11580.33   | 0.89782412  | 0.046880731 | 78716.6   | 81518.75  | Down                                             | Neurotensin 1 OS=Mus musculus GN-Nbnx1 PE=1 Sv=1                                         |
| GRM1    | P23318   | 7   | 7   | 21047.14  | 31980.86  | 22362.14  | 57387.14  | 27266.71  | 41468.14  | 40629.29  | 29949.29  | 30745.14  | 11611.29   | 0.89782412  | 0.046880731 | 78716.6   | 81518.75  | Down                                             | Neurotensin 1 OS=Mus musculus GN-Nbnx1 PE=1 Sv=1                                         |
| PGAM5   | OR8X10   | 5   | 5   | 16050.4   | 32974.5   | 18438.8   | 51682.4   | 25242.4   | 40395.2   | 19892.2   | 25509     | NA        | 0.89949391 | 0.046216449 | 29588.28    | 30606.4   | Down      | Neurotensin 1 OS=Mus musculus GN-Nbnx1 PE=1 Sv=1 |                                                                                          |
| PNPL1   | Q5G986   | 1   | 1   | 1445      | NA         | 0.89949391  | 0.046216449 | 29588.28  | 30606.4   | Down                                             | Neurotensin 1 OS=Mus musculus GN-Nbnx1 PE=1 Sv=1                                         |
| GLI3    | PE0245   | 17  | 17  | 37236.12  | 50066.53  | 55674.35  | 96369.18  | 55466.58  | 70889.41  | 70454.57  | 56332.59  | 46412.88  | 43734.59   | 0.90007472  | 0.04556077  | 58862.54  | 57464.8   | Down                                             | Neurotensin 1 OS=Mus musculus GN-Nbnx1 PE=1 Sv=1                                         |
| DAMM1   | Q80D00-3 | 1   | 1   | NA        | NA        | NA        | 6681      | 936       | 13781     | 10219     | 20183     | 3220      | NA         | 0.90012277  | 0.04546619  | 13954.25  | 12684.667 | Down                                             | Neurotensin 1 OS=Mus musculus GN-Nbnx1 PE=1 Sv=1                                         |
| KIF2A   | P28740   | 16  | 16  | 29448.25  | 37084.56  | 37393.94  | 38720.75  | 34628.19  | 37844.19  | 41104.62  | 24626.12  | 33795.38  | 42073.19   | 0.90121227  | 0.045172882 | 35446.738 | 35908.2   | Down                                             | Neurotensin 1 OS=Mus musculus GN-Nbnx1 PE=1 Sv=1                                         |
| CDK2A2  | OR8X17   | 1   | 1   | 15516     | 13758     | 22862     | 9105      | 16212     | 14067     | 14162     | NA        | 19774     | NA         | 0.90121227  | 0.045172882 | 35446.738 | 35908.2   | Down                                             | Neurotensin 1 OS=Mus musculus GN-Nbnx1 PE=1 Sv=1                                         |
| ND1     | Q5G986   | 1   | 1   | 289       | 1384      | NA        | 289       | 1384      | NA        | 289       | 1384      | NA        | 289        | 0.90121227  | 0.045172882 | 35446.738 | 35908.2   | Down                                             | Neurotensin 1 OS=Mus musculus GN-Nbnx1 PE=1 Sv=1                                         |
| GNEI    | PE2880   | 26  | 26  | 107261.62 | 121273.58 | 85086.23  | 267525.08 | 111776.35 | 173482.42 | 133537.23 | 154568.04 | 129481.96 | 77538.08   | 0.90166137  | 0.044956649 | 138584.57 | 133865.95 | Down                                             | Neurotensin 1 OS=Mus musculus GN-Nbnx1 PE=1 Sv=1                                         |
| ND2     | ORC2A6-4 | 2   | 2   | 106399.5  | 90642.5   | 69527     | 70588.5   | 113426.5  | 85281.5   | 103600    | 21360     | 13749.5   | NA         | 0.90172261  | 0.044956649 | 138584.57 | 133865.95 | Down                                             | Neurotensin 1 OS=Mus musculus GN-Nbnx1 PE=1 Sv=1                                         |
| EF1B    | ORC2A6-4 | 4   | 4   | 37027     | 30899.33  | 14606     | 43362.67  | 32935.33  | 36988.33  | 30102.33  | 19922.33  | 34528.33  | NA         | 0.90212467  | 0.044709717 | 31453.246 | 30703.33  | Down                                             | Neurotensin 1 OS=Mus musculus GN-Nbnx1 PE=1 Sv=1                                         |
| EF1B    | ORC2A6-4 | 4   | 4   | 37027     | 30899.33  | 14606     | 43362.67  | 32935.33  | 36988.33  | 30102.33  | 19922.33  | 34528.33  | NA         | 0.90212467  | 0.044709717 | 31453.246 | 30703.33  | Down                                             | Neurotensin 1 OS=Mus musculus GN-Nbnx1 PE=1 Sv=1                                         |
| SLC30A9 | Q5G986   | 1   | 1   | 1306      | 11353.53  | NA        | 24945     | 10474     | 15031     | 13125     | 2476.47   | 9331      | NA         | 0.90246671  | 0.04454347  | 1617      | 1681      | Down                                             | Neurotensin 1 OS=Mus musculus GN-Nbnx1 PE=1 Sv=1                                         |
| CTDP1   | Q5G986   | 1   | 1   | 1006      | NA        | NA        | 1982      | 1863      | 1500      | 1014      | NA        | 2451      | NA         | 0.90254174  | 0.04454347  | 1617      | 1681      | Down                                             | Neurotensin 1 OS=Mus musculus GN-Nbnx1 PE=1 Sv=1                                         |
| ORC17   | Q5G986   | 20  | 20  | 18445.05  | 30570.45  | 15601.9   | 54806.45  | 31571.9   | 42386.05  | 43994.2   | 14452.2   | 33450.95  | 10513.85   | 0.90254174  | 0.04454347  | 1617      | 1681      | Down                                             | Neurotensin 1 OS=Mus musculus GN-Nbnx1 PE=1 Sv=1                                         |
| CLDN1   | Q5G986   | 1   | 1   | 1006      | NA        | NA        | 1982      | 1863      | 1500      | 1014      | NA        | 2451      | NA         | 0.90254174  | 0.04454347  | 1617      | 1681      | Down                                             | Neurotensin 1 OS=Mus musculus GN-Nbnx1 PE=1 Sv=1                                         |
| PSMA5   | Q5G986   | 7   | 7   | 37321.71  | 33769.71  | 37241.86  | 29561.71  | 31649.86  | 34058     | 38112.14  | 41122.29  | 39455.57  | 16155.43   | 0.90303599  | 0.04437251  | 2760.5    | 2998.667  | Down                                             | Neurotensin 1 OS=Mus musculus GN-Nbnx1 PE=1 Sv=1                                         |
| CLCN7   | Q70496   | 1   | 1   | 1416      | 13263     | NA        | 776       | 4203      | 3215      | 254       | NA        | 1540      | NA         | 0.90303599  | 0.04437251  | 2760.5    | 2998.667  | Down                                             | Neurotensin 1 OS=Mus musculus GN-Nbnx1 PE=1 Sv=1                                         |
| SV2A    | Q5G986   | 10  | 10  | 20127.12  | 49310.71  | 13803.43  | 187976    | 50012.14  | 104836    | 78210.29  | 17836.57  | 37244     | NA         | 0.90303599  | 0.04437251  | 2760.5    | 2998.667  | Down                                             | Neurotensin 1 OS=Mus musculus GN-Nbnx1 PE=1 Sv=1                                         |
| CD7C    | Q5G986   | 1   | 1   | 38015.33  | 34180     | 29960.33  | 36117.33  | 30980.33  | 36117.33  | 30980.33  | 36117.33  | 30980.33  | 36117.33   | 0.90303599  | 0.04437251  | 2760.5    | 2998.667  | Down                                             | Neurotensin 1 OS=Mus musculus GN-Nbnx1 PE=1 Sv=1                                         |
| STREP5L | Q5G986   | 1   | 1   | 678       | 2380.3    | NA        | 7004      | 4005      | 4555      | NA        | NA        | 1926      | NA         | 0.90303599  | 0.04437251  | 2760.5    | 2998.667  | Down                                             | Neurotensin 1 OS=Mus musculus GN-Nbnx1 PE=1 Sv=1                                         |
| ANK2    | Q8C8R3-6 | 16  | 16  | 12368.69  | 28703.19  | 12143.81  | 68688.81  | 41767.69  | 54320.88  | 57969.94  | 6691.56   | 31274.06  | 201.06     | 0.90498441  | 0.04335882  | 3270.438  | 30612.1   | Down                                             | Neurotensin 1 OS=Mus musculus GN-Nbnx1 PE=1 Sv=1                                         |
| RIM2    | Q5G986-2 | 1   | 1   | 7654      | 5689      | NA        | 15242     | 38042     | 18659     | 17664     | NA        | 10645     | NA         | 0.90498441  | 0.04335882  | 3270.438  | 30612.1   | Down                                             | Neurotensin 1 OS=Mus musculus GN-Nbnx1 PE=1 Sv=1                                         |
| AP2M1   | Q5G986   | 19  | 19  | 11208.11  | 16434.33  | 31997.33  | 24970.33  | 24970.33  | 24970.33  | 24970.33  | 24970.33  | 24970.33  | 24970.33   | 0.90498441  | 0.04335882  | 3270.438  | 30612.1   | Down                                             | Neurotensin                                                                              |

|               |           |     |     |           |           |           |           |           |          |           |           |           |             |             |             |           |           |                                                                           |                                                                                                                 |
|---------------|-----------|-----|-----|-----------|-----------|-----------|-----------|-----------|----------|-----------|-----------|-----------|-------------|-------------|-------------|-----------|-----------|---------------------------------------------------------------------------|-----------------------------------------------------------------------------------------------------------------|
| GABRR4        | Q9WV18    | 2   | 2   | 1844.5    | 5853      | NA        | 33480.5   | 11024     | 26041    | 19009.5   | 7758      | 2187.5    | NA          | 0.91586594  | 0.036891553 | 13275.5   | 14246.623 | Up                                                                        | Gamma-aminobutyric acid type B receptor subunit 4 OS-Mus-musculus GN-Gabbr1 PE-1 SV-1                           |
| Z3J0211J03RHK | OR07E4    | 3   | 3   | 24949.67  | 31637.33  | 32663.67  | 31951     | 25818.67  | 27417.33 | 27045     | 26968     | 35613.67  | 31285.33    | 0.91586593  | 0.036894977 | 29044.068 | 29653.866 | Up                                                                        | UPF0449 protein C19orf25 homolog OS-Mus-musculus PE-1 SV-1                                                      |
| TP53BP1       | P70999-3  | 1   | 1   | 5332      | 6246      | NA        | 3577      | 41932     | 7211     | NA        | NA        | NA        | NA          | 0.91586592  | 0.036894722 | 6741.75   | 6955.1    | Down                                                                      | Isomorph 3 of tumor suppressor p53-binding protein 1 OS-Mus-musculus GN-Tp53bp1                                 |
| TPST1         | P71107    | 30  | 30  | 49008.92  | 50733.32  | 28593.07  | 52985.84  | 44877.32  | 54151.04 | 50466.82  | 41971.32  | 62812.5   | 12071.29    | 0.91586591  | 0.036891203 | 45312.32  | 44282.594 | Down                                                                      | Isomorph 3 of tyrosine phosphatase SH-PTPase OS-Mus-musculus GN-Tpst1 PE-1 SV-1                                 |
| KIF5C         | P28738    | 29  | 29  | 24152.93  | 31328.48  | 26213.62  | 42927.76  | 33203.62  | 38373.93 | 39586.76  | 18860.48  | 35560.48  | 22654.9     | 0.91586590  | 0.036897898 | 31565.282 | 31000.11  | Down                                                                      | Kinesin heavy chain isoform 5C OS-Mus-musculus GN-Kif5c PE-1 SV-3                                               |
| DYNC1I1       | OB8485    | 10  | 10  | 7211.01   | 13067.78  | 10095.56  | 16322.44  | 13774     | 19379.44 | 18158.33  | 5952.11   | 13761.67  | 3747        | 0.91586589  | 0.036856872 | 12595.978 | 12927.71  | Up                                                                        | Cytosolic dynein 1 intermediate chain 1 OS-Mus-musculus GN-Dync1i1                                              |
| KPS           | Q14115-3  | 3   | 3   | 5700.42   | 5700.42   | 5700.42   | 5700.42   | 5700.42   | 5700.42  | 5700.42   | 5700.42   | 5700.42   | 5700.42     | 0.91586588  | 0.036856872 | 12595.978 | 12927.71  | Up                                                                        | Isomorph 3 of Adrenomedullin receptor polypeptide chain OS-Mus-musculus GN-Kps                                  |
| CAIR          | P14311-1  | 34  | 34  | 7720.17   | 72624.87  | 9215.72   | 96437.9   | 67031     | 22485.77 | 69258.77  | 69258.77  | 69258.77  | 105106.77   | 0.91586587  | 0.036856872 | 12595.978 | 12927.71  | Up                                                                        | Calreticulin OS-Mus-musculus GN-Cair PE-1 SV-1                                                                  |
| BEGAN         | G681E5    | 18  | 18  | 12076.64  | 17311.36  | 8533.5    | 10521.5   | 19307.36  | 16499    | 18120.93  | 2108.93   | 24312.14  | NA          | 0.92016689  | 0.036038967 | 15750.472 | 15215.23  | Down                                                                      | Brain-enriched glycylate kinase-associated protein OS-Mus-musculus GN-Began PE-1 SV-2                           |
| SCN4A         | P52189    | 1   | 1   | 11051     | 44787.84  | NA        | 98813     | 55594     | 80262    | 85393     | 16443     | 18003     | NA          | 0.92120834  | 0.035494842 | 57211.25  | 50025.25  | Down                                                                      | Inward rectifier potassium channel 4 OS-Mus-musculus GN-Scn4a PE-1 SV-1                                         |
| GRIK4         | G6145-3   | 3   | 3   | 2787.31   | 31351.34  | NA        | 24930.62  | 31924.67  | 26944    | 11932     | 12989     | 49484.67  | 31822       | 0.92274144  | 0.044200867 | 28993.148 | 29384.934 | Up                                                                        | RNA-binding protein IWS OS-Mus-musculus GN-Grik4 PE-1 SV-2                                                      |
| LOC810        | Q8U11     | 2   | 2   | 14602.1   | 14602.1   | 11489     | 14602.1   | 14602.1   | 14602.1  | 14602.1   | 14602.1   | 14602.1   | 14602.1     | 0.92274144  | 0.044200867 | 28993.148 | 29384.934 | Up                                                                        | Cytochrome b-c1 complex subunit 4 OS-Mus-musculus GN-LOC810 PE-1 SV-1                                           |
| MPS1B         | Q9984-2   | 6   | 6   | 22442     | 22427.83  | 29281     | 25990.17  | 23949.17  | 29797.33 | 29028.5   | 19071.17  | 26820     | 22620       | 0.924829572 | 0.034829572 | 25242.034 | 25478.574 | Down                                                                      | Isomorph 2 of 28S ribosomal protein S18S, mitochondrial OS-Mus-musculus GN-Mps1b                                |
| MADD          | OR0U28-11 | 3   | 3   | 2965.33   | 4577.67   | 1127.33   | 12363     | 9085      | 10201.33 | 5164.33   | 1880.67   | 5831      | NA          | 0.923627086 | 0.034053939 | 6023.66   | 5756.8235 | Down                                                                      | Isomorph 11 of MAP kinase-activating death domain protein OS-Mus-musculus GN-Madd                               |
| APOL          | Q7884     | 1   | 1   | 1057      | 1881      | NA        | 4044      | 2966      | 9918     | 2138      | 3884      | 2098      | NA          | 0.924155217 | 0.034217878 | 21212     | 3195.9    | Down                                                                      | Apolipoprotein Olike OS-Mus-musculus GN-Apol PE-1 SV-1                                                          |
| PCAM1         | Q8D81     | 19  | 19  | 16370.24  | 146482.74 | 145157.74 | 136477.84 | 256436.74 | 143431   | 165108    | 135452.53 | 149346.19 | 29664.89    | 0.924350277 | 0.024350277 | 17424.86  | 17399.67  | Up                                                                        | Phosphoglycerate mutase 1 OS-Mus-musculus GN-Pcam1 PE-1 SV-1                                                    |
| ZFP30         | Q8D29B    | 1   | 1   | 14481     | 15314     | 11236     | 9836      | 13635     | 13740    | 94779     | 5916      | 23882     | 9090        | 0.924745322 | 0.033978702 | 12900.4   | 13220.21  | Down                                                                      | Zinc finger protein 330 OS-Mus-musculus GN-Zfp30 PE-2 SV-1                                                      |
| ATPIA1        | Q8V02C    | 102 | 102 | 27881.46  | 63325.18  | 31540.02  | 119801.41 | 59197.02  | 80305.62 | 94479.76  | 38560.04  | 43125.26  | 32788.55    | 0.924758543 | 0.033978648 | 60349.818 | 58317.046 | Down                                                                      | Sodium/potassium-transporting ATPase subunit alpha-1 OS-Mus-musculus GN-Atpia1 PE-1 SV-1                        |
| EMC2          | Q8C802    | 3   | 3   | 14588     | 18711     | 10820     | 25303.67  | 15400.33  | 22355    | 18802     | 9270.33   | 15987.33  | NA          | 0.924936106 | 0.033875589 | 16964.6   | 16603.665 | Down                                                                      | ER membrane protein complex subunit 2 OS-Mus-musculus GN-Emc2 PE-2 SV-1                                         |
| HMH           | Q8ACB-3   | 55  | 55  | 54095.53  | 60804.75  | 46591.44  | 124336.09 | 72126.73  | 91254.58 | 87534.02  | 63749.75  | 45897.75  | 0.925026069 | 0.033875589 | 16964.6     | 16603.665 | Down      | Isomorph 3 of Mitochondrial inner membrane protein OS-Mus-musculus GN-Hmh |                                                                                                                 |
| ANP2A         | O35381    | 3   | 3   | 37994     | 42669.33  | 16115.67  | 94133     | 30841.67  | 53374.33 | 36916.33  | NA        | 38510.67  | NA          | 0.925129893 | 0.033799164 | 44338.734 | 42933.777 | Down                                                                      | Acidic leucine-rich nuclear phosphoprotein 32 family member A OS-Mus-musculus GN-Anp2a PE-1 SV-1                |
| NRXN1         | P00197    | 2   | 2   | 9381      | 16095     | 8494      | 66488     | 23544     | 30150.5  | 30418.5   | NA        | 18356.5   | NA          | 0.92566893  | 0.033521222 | 25248.4   | 26368.5   | Up                                                                        | Neurexin-1 beta OS-Mus-musculus GN-Nrxn1 PE-1 SV-1                                                              |
| SOD1          | O20164    | 2   | 2   | 16788.5   | 60211.5   | 38256.5   | 7814.5    | 28060.5   | 14971    | 5397      | 77987     | 16471.5   | 25451       | 0.92566892  | 0.033521222 | 30192.3   | 31684.7   | Up                                                                        | Extracellular superoxide dismutase [Cu-Zn] OS-Mus-musculus GN-Sod1 PE-1 SV-1                                    |
| MYF2          | Q8C54-3   | 4   | 4   | 20801.25  | 12451.25  | 17620.5   | 13331.75  | 13893     | 13642.5  | 10312     | 20364.5   | 7548.5    | 24532       | 0.926238178 | 0.032717315 | 15619.95  | 15279.79  | Down                                                                      | Isomorph 2 of Myelin expression factor 2 OS-Mus-musculus GN-Myf2                                                |
| LPP           | Q8FWF7    | 4   | 4   | 13240.33  | 12590     | 19981.67  | 10483     | 12322     | 13826.67 | 13678.67  | 3218      | 26120     | NA          | 0.926738705 | 0.033042608 | 13723.4   | 14210.835 | Up                                                                        | Lipoma-preferred partner homolog OS-Mus-musculus GN-Lpp PE-1 SV-1                                               |
| LYP           | Q84WV-5   | 3   | 3   | 13240.33  | 12590     | 19981.67  | 10483     | 12322     | 13826.67 | 13678.67  | 3218      | 26120     | NA          | 0.926738705 | 0.033042608 | 13723.4   | 14210.835 | Up                                                                        | Isomorph 5 of Lipoma-preferred partner homolog OS-Mus-musculus GN-Lyp                                           |
| HDJ3          | Q8C5V6    | 16  | 16  | 35780.67  | 49017.47  | 38757     | 6327.67   | 55777.6   | 60425.87 | 63100.8   | 45799.8   | 52726.67  | 15721.67    | 0.92682783  | 0.031000481 | 48114.948 | 47464.367 | Down                                                                      | Isomorph 3 of protein-containing protein 1 OS-Mus-musculus GN-Hdj3 PE-1 SV-2                                    |
| THN1L1        | G8H855-1  | 1   | 1   | 3961      | 2389      | NA        | 97348     | 5171      | 5439     | NA        | 2363      | NA        | NA          | 0.927105208 | 0.032870959 | 5323.6    | 5115.661  | Down                                                                      | Thrombin synthase-like 1 OS-Mus-musculus GN-Thn1l1 PE-1 SV-1                                                    |
| PRUNE2        | Q8D9B-3   | 1   | 1   | 2176      | 1281      | NA        | 16079     | 8126      | 9169     | 11679     | 8016      | 8016      | NA          | 0.927105208 | 0.032870959 | 5323.6    | 5115.661  | Down                                                                      | Isomorph 3 of Protein-protein homolog 2 OS-Mus-musculus GN-Prune2                                               |
| DNM1          | P39053-3  | 58  | 58  | 44484.11  | 54099.63  | 41605.4   | 68905.28  | 51698     | 62790.56 | 61382.21  | 52114.88  | 47711.14  | 38818.82    | 0.928327163 | 0.032395217 | 52158.484 | 52755.522 | Up                                                                        | Isomorph 3 of Dynamin-1 OS-Mus-musculus GN-Dnm1                                                                 |
| ABIM1         | Q8K4G5-5  | 2   | 2   | 14841.5   | 27885.5   | 4888      | 30019     | 27885     | 28346    | 33686.5   | 3602.5    | 23721     | NA          | 0.928327163 | 0.032373831 | 21812.1   | 22589     | Up                                                                        | Isomorph 5 of Actin-binding LIM protein 1 OS-Mus-musculus GN-Abim1                                              |
| ACAD6         | P60653    | 1   | 1   | 16480     | 16480     | 16480     | 16480     | 16480     | 16480    | 16480     | 16480     | 16480     | 16480       | 0.928327163 | 0.032373831 | 21812.1   | 22589     | Up                                                                        | Isomorph 3 of Acyl-CoA-binding domain-containing protein 5 OS-Mus-musculus GN-Acad6                             |
| BARFAP1       | A2A765    | 2   | 2   | 27109.5   | 38576     | 34620.5   | 106640    | 30766     | 57741.5  | 15108     | 32681.5   | 48922     | 21634       | 0.928327163 | 0.032373831 | 21812.1   | 22589     | Up                                                                        | Rah GTPase-activating protein 1 OS-Mus-musculus GN-Barfap1 PE-1 SV-1                                            |
| SEPTIN2       | Q8C850    | 2   | 2   | 9545.5    | 115308    | 16680     | 137759.5  | 121919.5  | 162904   | 107653.5  | 52513.5   | 84669     | 64278       | 0.929509694 | 0.03174595  | 97042.5   | 94403.8   | Down                                                                      | Septin-10 OS-Mus-musculus GN-Septin2 PE-2 SV-1                                                                  |
| GNAS          | P63094-3  | 6   | 6   | 8904.5    | 17157.33  | 14822.67  | 274743.83 | 16601     | 23227    | 22467     | 9201      | 15293.5   | 9183.17     | 0.930249028 | 0.031400981 | 61925.866 | 10894.334 | Down                                                                      | Isomorph Gnas-3 of Guanine nucleotide-binding protein G12i subunit alpha isoforms short OS-Mus-musculus GN-Gnas |
| SCN2B         | Q8C80B    | 18  | 18  | 49047.61  | 63728.83  | 43050.28  | 80281.28  | 69335.78  | 84899    | 89890.61  | 99465.33  | 80709.13  | 93307.64    | 0.930249028 | 0.031400981 | 61925.866 | 10894.334 | Down                                                                      | Citrate synthase, mitochondrial OS-Mus-musculus GN-Scn2b PE-1 SV-1                                              |
| NR2H4         | Q8D9B-3   | 14  | 14  | 4826.43   | 52921.43  | 27149.43  | 18846.43  | 37126.43  | 28721.43 | 39521.43  | 37043.53  | 39667.38  | 47228.78    | 0.930249028 | 0.031400981 | 61925.866 | 10894.334 | Down                                                                      | Isomorph 3 of Nuclear transcription initiation factor 4H OS-Mus-musculus GN-Nr2h4                               |
| AKR1A1        | Q9106     | 9   | 9   | 47382.44  | 54171     | 59753.89  | 58522.44  | 49969     | 51789.33 | 59112.67  | 45135.33  | 65510.44  | 46183.56    | 0.930418235 | 0.031131787 | 53959.754 | 53546.266 | Down                                                                      | Alcohol dehydrogenase [NAD(P)+] OS-Mus-musculus GN-Akr1a1 PE-1 SV-1                                             |
| NDEL1         | Q9ER81    | 13  | 13  | 30653.69  | 29221.31  | 17876.23  | 26021.38  | 31594.85  | 31570.08 | 32273.77  | 16230.54  | 40595.31  | 12033.62    | 0.930418235 | 0.031131787 | 53959.754 | 53546.266 | Down                                                                      | Nuclear distribution protein nuff-like 1 OS-Mus-musculus GN-Ndel1 PE-1 SV-2                                     |
| ARAP9         | Q7017-3   | 1   | 1   | 786       | 918       | 2201      | 4015      | 2425      | 1933     | 1096      | NA        | 2146      | NA          | 0.931505076 | 0.030787743 | 2099      | 2415      | Up                                                                        | Isomorph 3 of Arp2/3 complex subunit 9 OS-Mus-musculus GN-Arap9                                                 |
| CTSD12        | Q8C5V6    | 2   | 2   | 15904.57  | 17480     | 17480     | 17480     | 17480     | 17480    | 17480     | 17480     | 17480     | 17480       | 0.931505076 | 0.030787743 | 2099      | 2415      | Up                                                                        | Isomorph 3 of C-terminal domain-containing protein 12 OS-Mus-musculus GN-Cttd12 PE-1 SV-1                       |
| SNX4          | Q7017-3   | 1   | 1   | 570.67    | 5078.33   | 574.67    | 10730.33  | 6514.33   | 8169     | 7631.33   | 1006.33   | 9943.33   | NA          | 0.931505076 | 0.030787743 | 2099      | 2415      | Up                                                                        | Sorting nexin-4 OS-Mus-musculus GN-Snx4 PE-2 SV-1                                                               |
| MAPKBP3       | Q8D9B-3   | 4   | 4   | 16970.75  | 24122.75  | 10245.75  | 27986.25  | 24952.5   | 33259    | 32755.5   | 8089      | 21327     | 6450        | 0.932278513 | 0.030454325 | 20855.6   | 20776.1   | Down                                                                      | Isomorph 13 of C-terminus-terminal kinase-interacting protein 3 OS-Mus-musculus GN-Mapbp3                       |
| VP11          | Q191W6    | 3   | 3   | 17510.67  | 30039.33  | 30256     | 29655     | 34413.33  | 36934.67 | 17157     | 2338      | 14505.33  | NA          | 0.932446703 | 0.030423618 | 28294.866 | 27774.25  | Down                                                                      | Vascular protein sorting-associated protein 11 homolog OS-Mus-musculus GN-Vp11 PE-1 SV-1                        |
| SCN2A3        | Q8C2A3    | 24  | 24  | 58301.22  | 61297.52  | 51247.48  | 61000.5   | 58925.1   | 60027.48 | 57923.18  | 58923.18  | 58923.18  | 58923.18    | 0.932446703 | 0.030423618 | 28294.866 | 27774.25  | Down                                                                      | Isomorph 3 of C-terminal domain-containing protein 12 OS-Mus-musculus GN-Scn2a3                                 |
| HTH12H1B      | G64478    | 48  | 48  | 328126.46 | 146372.21 | 241563.81 | 50681.96  | 182656.58 | 91721.52 | 105499.15 | 289503.5  | 120474.71 | 37237.25    | 0.93316828  | 0.030040032 | 189981.01 | 196331.23 | Up                                                                        | Isomorph H2B type 1-H OS-Mus-musculus GN-Hth12h1b PE-1 SV-3                                                     |
| RBXN          | Q8D756    | 1   | 1   | 1352      | 13034     | 5055      | 394       | 3153      | 13034    | NA        | NA        | NA        | 0.933281551 | 0.030007516 | 2026.25     | 2156.5    | Down      | Ribonexus-5 OS-Mus-musculus GN-Rbxn PE-2 SV-1                             |                                                                                                                 |
| CAMK2B        | P28652    | 46  | 46  | 63751.87  | 90785.09  | 78403.87  | 153201.07 | 99093.43  | 11581.59 | 126033.44 | 90272.46  | 88709.98  | 72201.48    | 0.934986055 | 0.028946005 | 93746.066 | 98613.784 | Down                                                                      | Calcium/calmodulin-dependent protein kinase type 2 subunit beta OS-Mus-musculus GN-Camk2b PE-1 SV-2             |
| GFY           | Q8H14     | 48  | 48  | 48236.43  | 71906.43  | 54651.71  | 25981.46  | 34981.79  | 33300.47 | 41776.43  | 37756.43  | 60807.29  | 36778.29    | 0.934986055 | 0.028946005 | 93746.066 | 98613.784 | Down                                                                      | Isomorph 3 of GTPase-activating protein 12 OS-Mus-musculus GN-Gfy                                               |
| OXN1          | Q4QMM3-3  | 10  | 10  | 28436     | 32664.14  | 23206.57  | 46380.6   | 37031.57  | 38781.43 | 24762.14  | 20585.14  | 32846.14  | 33787.13    | 0.935248434 | 0.029073013 | 33167.026 | 33727.256 | Down                                                                      | Isomorph 3 of Oxidation resistance protein 1 OS-Mus-musculus GN-Oxn1                                            |
| KCNAB1        | P63343    | 1   | 1   | 12387     | 14841     | 8638      | 15195     | 19736     | 16915    | 15262     | 6288      | 37005     | NA          | 0.935802136 |             |           |           |                                                                           |                                                                                                                 |

|          |           |       |     |           |           |           |           |           |           |           |           |           |             |             |             |             |           |                                                                                           |                                                                                                           |                                                                                         |
|----------|-----------|-------|-----|-----------|-----------|-----------|-----------|-----------|-----------|-----------|-----------|-----------|-------------|-------------|-------------|-------------|-----------|-------------------------------------------------------------------------------------------|-----------------------------------------------------------------------------------------------------------|-----------------------------------------------------------------------------------------|
| BAG1     | Q8BC32    | 32634 | NA  | 1         | 1         | 18282     | 32634     | 56779     | 35474     | 43502     | 53166     | 15847     | 36755       | NA          | 0.951445957 | 0.021615955 | 38042     | 37171                                                                                     | Down                                                                                                      | BAG family molecular chaperone regulator 5 OS=Mus musculus GN-Bag5 PE=1 SV=1            |
| BAK2     | Q61595-15 | 15    | 15  | 17921.2   | 28890.8   | 17834.2   | 68089.4   | 35698.7   | 52767     | 53875.2   | 17846.4   | 36195.2   | 5301.93     | NA          | 0.951704551 | 0.021497854 | 34030.894 | 31884.786                                                                                 | Down                                                                                                      | isoform 15 of Kinetin OS=Mus musculus GN=Knt1                                           |
| PTPNS    | Q5C460-3  | 1     | 1   | 21034     | 31708     | 12455     | 98878     | 49022     | 60430     | 39473     | 28154     | 31826     | NA          | NA          | 0.951725271 | 0.021488252 | 40989.3   | 38992.76                                                                                  | Down                                                                                                      | isoform 3 of Tyrosine protein phosphatase non-receptor type 75 OS=Mus musculus GN=Ptpns |
| QSOX3    | Q5C460-3  | 3     | 3   | 78800.67  | 87839     | 46331.67  | 58209.27  | 81834.67  | 67115     | 19731     | 14240     | 95200.33  | NA          | NA          | 0.951338178 | 0.021391178 | 6617.068  | 6617.068                                                                                  | Down                                                                                                      | isoform 3 of Nuclear distribution protein nucleosome 1 OS=Mus musculus GN=Ndx1          |
| NTM      | Q09910    | 35    | 35  | 16137.27  | 22101.06  | 17593.42  | 58726.34  | 18330.24  | 33461.48  | 35681.64  | 16761.58  | 28361.03  | NA          | NA          | 0.952103811 | 0.021356751 | 58765.87  | 27162.97                                                                                  | Down                                                                                                      | Neurotrophin OS=Mus musculus GN=Ntrn PE=2 SV=2                                          |
| MSPS18b  | Q09984    | 7     | 7   | 21945     | 21249.57  | 25098     | 26031.71  | 21644.71  | 28208     | 36348     | 16346.71  | 2487.43   | 19424.57    | NA          | 0.95216868  | 0.021285971 | 51933.58  | 23040.947                                                                                 | Down                                                                                                      | 2B5 ribosomal protein 18b, mitochondrial OS=Mus musculus GN=Mps18b PE=2 SV=1            |
| IRX15    | Q40277    | 3     | 3   | 19025     | 19237.57  | 10331.37  | 147474.37 | 139804    | 13867.37  | 18723.37  | 147474.37 | 14722.37  | 147474.37   | NA          | 0.95216868  | 0.021285971 | 51933.58  | 23040.947                                                                                 | Down                                                                                                      | IRX15 ribosomal protein 15 OS=Mus musculus GN=Irx15 PE=1 SV=1                           |
| AT2P29   | Q55143    | 38    | 38  | 25937.57  | 48236.17  | 43150.17  | 115149.87 | 48202.80  | 80271.18  | 77052.32  | 50150.18  | 42020.63  | NA          | NA          | 0.95203135  | 0.021093435 | 54623.248 | 52751.314                                                                                 | Down                                                                                                      | Sarcosine/endoparasitium reticulum-associated ATPase 2 OS=Mus musculus GN=At2p29        |
| QOGR     | Q09952    | 2     | 2   | 2970      | NA          | NA          | 0.952366812 | 0.020921449 | 4729.6667 | 4637.1                                                                                    | Down                                                                                                      | Oxidant growth factor receptor OS=Mus musculus GN=Ogr PE=2 SV=1                         |
| GRAM5    | Q3U1V0-2  | 2     | 2   | 2378      | NA          | NA          | 0.952366812 | 0.020740861 | 11245.75  | 11775.5                                                                                   | Down                                                                                                      | isoform 2 of Metabotropic glutamate receptor 5 OS=Mus musculus GN=Grm5                  |
| UBX2C    | P51807    | 1     | 1   | 17791     | 18471     | 23168     | 12762     | 11668     | 18096     | 16804     | 12028     | 11381     | 20081       | NA          | 0.95348904  | 0.020507172 | 17591.8   | 17798.7                                                                                   | Down                                                                                                      | Ubiquitin-protein ligase complex subunit 2 OS=Mus musculus GN=Ubx2c PE=1 SV=1           |
| CKM1C    | Q5C460-3  | 16    | 16  | 17052.88  | 27598.67  | 17021.68  | 67430.67  | 34132.38  | 51105.81  | 51789.25  | 16773.06  | 34754.75  | 4970.56     | NA          | 0.95348904  | 0.020621118 | 32447.238 | 31858.686                                                                                 | Down                                                                                                      | isoform 16 of Nuclear distribution protein nucleosome 1 OS=Mus musculus GN=Ndx1         |
| CKM1C    | Q5C460-3  | 4     | 4   | 19810.25  | 32790.5   | 14093     | 30938.5   | 33831.25  | 35251.5   | 35004.25  | 9515.25   | 45602.25  | NA          | NA          | 0.95348904  | 0.020597023 | 26792.7   | 26813.1                                                                                   | Down                                                                                                      | Casem kinase I isoform delta OS=Mus musculus GN=Ckml1c PE=1 SV=2                        |
| PALM2    | Q8BR92    | 4     | 4   | 82776.75  | 79377.25  | 58187.25  | 102055    | 113764.25 | 123101.75 | 148764.5  | 15391     | 120865.25 | 32345       | 0.953471499 | 0.02059632  | 90584.1     | 92165.9   | Down                                                                                      | Paralamin-2 OS=Mus musculus GN=Paln2 PE=1 SV=1                                                            |                                                                                         |
| SPC2     | Q0C9N2    | 2     | 2   | 11670     | 20162     | NA        | 36299     | 10435     | 21984     | 21984     | NA        | 13908     | NA          | NA          | 0.9540086   | 0.020412249 | 19641.5   | 19242                                                                                     | Down                                                                                                      | Signal peptidase complex subunit 2 OS=Mus musculus GN=Spcl2 PE=1 SV=1                   |
| Q14B1A   | Q14B1A    | 1     | 1   | 47261     | 56403.5   | 86288     | 23564     | 42156     | 39096     | 30242     | 32520     | 31046     | 85717       | NA          | 0.954221274 | 0.020306642 | 44325.8   | 44868.2                                                                                   | Down                                                                                                      | Dial homotetrasulfide B member 14 OS=Mus musculus GN=D14b14 PE=2 SV=1                   |
| H1SH2BA  | Q02U05    | 40    | 40  | 440031.03 | 196276.08 | 283438.72 | 70838.98  | 250856.23 | 141626.88 | 148593.8  | 348884.58 | 172931.38 | 455554.88   | 0.954338699 | 0.020297465 | 248288.21   | 753442.1  | Down                                                                                      | Histone H2B type 3-A OS=Mus musculus GN=H2b3a PE=1 SV=3                                                   |                                                                                         |
| PA       | P46660    | 68    | 68  | 122987.72 | 142448.44 | 105639.37 | 88151.22  | 119950.41 | 94687.07  | 105757.5  | 15855.76  | 127884.22 | 142864.13   | 0.95460071  | 0.020217638 | 124835.43   | 215699.74 | Up                                                                                        | Alpha-interferon OS=Mus musculus GN=Inf1 PE=1 SV=3                                                        |                                                                                         |
| SNVNP200 | Q6P4T2    | 3     | 3   | 1306      | 4402      | NA        | 6226      | 5544      | 5891      | 6269      | NA        | 1354      | NA          | 0.954922888 | 0.020031697 | 4369.5      | 4484.667  | Down                                                                                      | U5 small nuclear ribonucleoprotein 200 kDa heliase OS=Mus musculus GN=Snvnp200 PE=1 SV=1                  |                                                                                         |
| TMR2D2   | Q1U144    | 7     | 7   | 20727.29  | 46513.57  | 45586.66  | 54100.57  | 28370.71  | 82871.81  | 47827.14  | 46929.34  | 58608.14  | 15304.34    | 0.955010893 | 0.01999623  | 44931.8     | 45414.654 | Down                                                                                      | isoform 4 of Threonine reductase 2, mitochondrial OS=Mus musculus GN=Tmr2d2                               |                                                                                         |
| HNNPNC   | Q02U04-3  | 11    | 11  | 155003.18 | 101080.73 | 111665.64 | 48456.91  | 111922.45 | 82181.82  | 62681.64  | 169977.27 | 99904     | 103060.45   | 0.955336748 | 0.019846316 | 105625.78   | 106961.04 | Down                                                                                      | isoform 3 of Heterogeneous nuclear ribonucleoproteins C1/C2 OS=Mus musculus GN=Hnnpnc                     |                                                                                         |
| LARP4    | Q8BWW4    | 4     | 4   | 26005     | 33484.5   | 47444.75  | 15165     | 24643.75  | 22834.75  | 34480     | 22900.25  | 34846.75  | 33565.25    | 0.955401318 | 0.019813317 | 29371.8     | 29725.8   | Down                                                                                      | La-related protein 4 OS=Mus musculus GN=Larp4 PE=2 SV=2                                                   |                                                                                         |
| PP2A2    | Q8BR59    | 21    | 21  | 17023.72  | 20980.33  | 10659.89  | 23608.22  | 23454.22  | 36311.56  | 25046.94  | 10180.87  | 2727.88   | 8011.28     | 0.955722128 | 0.019666687 | 19145.276   | 19428.046 | Up                                                                                        | Liprin-alpha 2 OS=Mus musculus GN=Pp2a2 PE=1 SV=2                                                         |                                                                                         |
| WT1      | P55695    | 8     | 8   | 10878.38  | 26165.38  | 14135.38  | 95184.5   | 20367.88  | 95957.88  | 50325.75  | 32061     | 26637.75  | 9243.88     | 0.955826237 | 0.019575789 | 34546.404   | 35571.275 | Down                                                                                      | Wilms tumor OS=Mus musculus GN=Wt1 PE=1 SV=1                                                              |                                                                                         |
| AKAP2    | Q54911-3  | 2     | 2   | 16517.5   | 17508.5   | 5629.5    | 29280.5   | 22643.5   | 18798     | 17776.5   | NA        | 19665     | NA          | 0.95640009  | 0.019433022 | 1813.5      | 18545.5   | Down                                                                                      | protein of A-kinase anchor protein 2 OS=Mus musculus GN=Akap2                                             |                                                                                         |
| PPAP12C  | Q3UMT1    | 5     | 5   | 10626.2   | 15395     | 14310.6   | 13478.4   | 16360.2   | 13710.8   | 3510.6    | 20399.2   | NA        | NA          | 0.956581136 | 0.019277886 | 13727.04    | 13510.2   | Down                                                                                      | Protein phosphatase 1 regulatory subunit 12C OS=Mus musculus GN=Ppp1r12c PE=1 SV=1                        |                                                                                         |
| ANXA3    | Q35339    | 3     | 3   | 65091.3   | 53207     | 43145.5   | 7406      | 44077.5   | 51586     | 48415.5   | 71401     | 55470.5   | 24088.5     | 0.957057967 | 0.019098476 | 50693.9     | 50192.1   | Down                                                                                      | Annexin A3 OS=Mus musculus GN=Anxa3 PE=1 SV=4                                                             |                                                                                         |
| WDR7     | Q6P7V0    | 1     | 1   | 34472     | 78033     | 60260     | 35516     | 31795     | 42710     | 28044     | NA        | 40998     | NA          | 0.957334467 | 0.01893933  | 378.132     | 37416.667 | Down                                                                                      | WAS/WAS-interacting protein family member 2 OS=Mus musculus GN=Wdr7 PE=2 SV=3                             |                                                                                         |
| Q8BR92   | Q8BR92    | 17    | 17  | 1685      | 1780      | NA          | NA          | 0.958459136 | 0.018914844 | 2500.75   | 2473.75                                                                                   | Down                                                                                                      | isoform 17 of Nuclear distribution protein nucleosome 1 OS=Mus musculus GN=Ndx1         |
| Q8BR92   | Q8BR92    | 17    | 17  | 34504.2   | 50511.73  | 26183.93  | 71533.47  | 64860.6   | 63832.53  | 78132.53  | 42448     | 49907     | 0.957371457 | 0.018919484 | 49482.786   | 50677.509   | Down      | isoform 17 of Nuclear distribution protein nucleosome 1 OS=Mus musculus GN=Ndx1           |                                                                                                           |                                                                                         |
| ANKS10   | Q8BR92    | 6     | 6   | 37818.33  | 47971     | 88411.17  | 38884.83  | 51530.5   | 41673.67  | 60048.33  | 64332.67  | 57808.67  | 43735.17    | 0.957400252 | 0.018909464 | 52883.366   | 53452.902 | Down                                                                                      | Ankyrin repeat and sterile alpha motif domain-containing protein 10 OS=Mus musculus GN=Anks10 PE=1 SV=3   |                                                                                         |
| MAP2     | Q54911-3  | 135   | 135 | 54092.46  | 50992.46  | 49274.46  | 50924.46  | 57205.62  | 61829.7   | 43120.06  | 57205.62  | 61829.7   | 43120.06    | 0.958459136 | 0.018909464 | 52883.366   | 53452.902 | Down                                                                                      | Microtubule-associated protein 2 OS=Mus musculus GN=Map2 PE=1 SV=3                                        |                                                                                         |
| VP52     | Q8C752    | 1     | 1   | 3707      | 56403.5   | 86288     | 23564     | 42156     | 39096     | 30242     | 32520     | 31046     | 85717       | NA          | 0.958459136 | 0.018909464 | 52883.366 | 53452.902                                                                                 | Down                                                                                                      | isoform 1 of Viscerotropic acid phosphatase type 5 OS=Mus musculus GN=Vp52 PE=2 SV=2    |
| ATP13A3  | Q6P6C5    | 187   | 187 | 27895.2   | 8871.05   | 33236.54  | 125058.81 | 98793.33  | 114964.72 | 47314.27  | 50751.66  | 33036.46  | 0.958470522 | 0.018421239 | 69836.31    | 68352.088   | Down      | Sodium/potassium-transporting ATPase subunit alpha 3 OS=Mus musculus GN=Atp13a3 PE=1 SV=1 |                                                                                                           |                                                                                         |
| VCAM1    | P29533-2  | 8     | 8   | 35653.38  | 44023.88  | 41385.5   | 39862.75  | 52039.12  | 58393.62  | 57491     | 23057.62  | 57453.12  | 88464.25    | 0.958811727 | 0.018357466 | 42592.926   | 43088.62  | Down                                                                                      | isoform 2 of Vascular cell adhesion protein 1 OS=Mus musculus GN=Vcam1                                    |                                                                                         |
| GADD45B  | Q8C639    | 1     | 1   | 56968     | 24456     | 36304     | 14697     | 31907     | 24594     | 26020     | 20332     | 46362     | 20844       | 0.958972177 | 0.018308768 | 30504.4     | 31034.82  | Down                                                                                      | Growth arrest and DNA damage-inducible protein-interacting protein 1 OS=Mus musculus GN=Gadd45b PE=2 SV=1 |                                                                                         |
| Q8C7H2B6 | Q8C7H2B6  | 41    | 41  | 38979.57  | 176643.61 | 283708.61 | 25196.98  | 131986.58 | 113388.44 | 133486.58 | 113388.44 | 133486.58 | 113388.44   | 0.959433013 | 0.018291281 | 22458.76    | 22458.76  | Down                                                                                      | isoform 41 of Tyrosine reductase 2, mitochondrial OS=Mus musculus GN=Tmr2d2                               |                                                                                         |
| KIF5B    | Q61768    | 14    | 14  | 19366.38  | 24068.54  | 13382.31  | 37200.23  | 28239.77  | 32881.85  | 29762.31  | 16454.15  | 29231.31  | 16345.92    | 0.958900617 | 0.018130911 | 24451.446   | 24735.108 | Up                                                                                        | Kinesin-1 heavy chain OS=Mus musculus GN=Kif5b PE=1 SV=3                                                  |                                                                                         |
| BSDC1    | Q8BY05    | 1     | 1   | 744       | 10898     | NA          | 0.958988136 | 0.018195452 | 1455.75     | 1498      | Down                                                                                      | BSD domain-containing protein 1 OS=Mus musculus GN=Bsdcl1 PE=2 SV=1                                       |                                                                                         |
| BAD      | Q61837    | 3     | 3   | 20057.33  | 16484.67  | 34905.33  | 10047.67  | 16138     | 18390     | 13417.67  | 20923.67  | 26648.33  | 19693.33    | 0.959097708 | 0.018137378 | 15944.6     | 15944.6   | Down                                                                                      | Rac2 antagonist of cell death OS=Mus musculus GN=Bad PE=1 SV=1                                            |                                                                                         |
| IRAP     | Q62149    | 48    | 48  | 26219.8   | 36518.6   | 25544.16  | 88146.89  | 28109.47  | 31898.67  | 25544.16  | 88146.89  | 28109.47  | 31898.67    | 0.959246148 | 0.018093978 | 3904.138    | 42599.847 | Down                                                                                      | isoform 48 of Tyrosine reductase 2, mitochondrial OS=Mus musculus GN=Tmr2d2                               |                                                                                         |
| CONR1B   | Q0WUW3    | 6     | 6   | 23308     | 24555.5   | 21271.33  | 20242.83  | 76055.17  | 26072.5   | 25535.83  | 21237.83  | 24204.33  | 18687.5     | 0.959768971 | 0.017962329 | 21056.566   | 21347.598 | Down                                                                                      | Conorin-1B OS=Mus musculus GN=Conr1b PE=1 SV=3                                                            |                                                                                         |
| FAM131B  | Q37650-2  | 12    | 12  | 16763.55  | 16682.82  | 13966.36  | 26259.09  | 20397.09  | 21874.27  | 21355     | 17200     | 22995.36  | 13426       | 0.959925106 | 0.017726265 | 18873.782   | 19031.326 | Up                                                                                        | isoform 12 of Protein FAM131B OS=Mus musculus GN=Fam131b                                                  |                                                                                         |
| SEPT5    | Q1H847    | 2     | 2   | 11158     | 7264      | 2081.5    | 29842     | 14212     | 19248.5   | 14386     | NA        | 10665.5   | NA          | 0.960101174 | 0.017735331 | 15012.6     | 14746.67  | Down                                                                                      | isoform 2 of Protein FAM131B OS=Mus musculus GN=Fam131b                                                   |                                                                                         |
| Q8C7H2B6 | Q8C7H2B6  | 20    | 20  | 29831     | 28234     | 18082.6   | 29026.26  | 30372.26  | 30372.26  | 30372.26  | 30372.26  | 30372.26  | 30372.26    | 0.960101174 | 0.017735331 | 15012.6     | 14746.67  | Down                                                                                      | isoform 20 of Protein FAM131B OS=Mus musculus GN=Fam131b                                                  |                                                                                         |
| TOP1     | Q04750    | 1     | 1   | 5397      | 2843      | 1617      | 1619      | 2811      | 751       | 1165      | 4431      | 734       | 6541        | 0.960580051 | 0.017466229 | 2857.4      | 2924.2    | Down                                                                                      | DNA topoisomerase 1 OS=Mus musculus GN=Top1 PE=1 SV=2                                                     |                                                                                         |
| SNK7     | Q8C7H2B6  | 1     | 1   | 3318      | 3535      | NA        | 7012.8    | 7483      | 8841      | 7012.8    | 7483      | 8841      | 7012.8      | 0.9613937   | 0.017413937 | 6282.5      | 6352      | Down                                                                                      | Serine-7 OS=Mus musculus GN=Snk7 PE=2 SV=1                                                                |                                                                                         |
| FSO1     | Q8BNV5-3  | 2     | 2   | 9213.1    | 78382     | 106280    | 88259     | 74781     | 83469     | 94649     | 78382     | 91482     | NA          | 0.960789949 | 0.017330689 | 88383       | 88203.2   | Down                                                                                      | isoform 3 of FSO1-like protein OS=Mus musculus GN=Fso1                                                    |                                                                                         |
| CDL114   | Q52167    | 15    | 15  | 23729.67  | 14475.67  | 31212     | 28186.67  | 23955.67  | 35954.33  | 28997.33  | NA        | 28997.33  | 18973       | 0.96126146  | 0.017330689 | 88383       | 88203.2   | Down                                                                                      | Bone morphogenetic protein receptor 114 OS=Mus musculus GN=Cdl114                                         |                                                                                         |
| NTPKR    | Q09855    | 15    | 15  | 22621.47  | 33194.47  | 10363.13  | 51328.4   | 28146.4   | 44648.07  | 44069.6   | 5434      | 36215.13  | 6071.93     | 0.962766359 | 0.017246385 | 29133.34    | 29658.746 | Down                                                                                      | Neural pentamerin receptor OS=Mus musculus GN=Ntpkr PE=1 SV=1                                             |                                                                                         |
| VTAL     | Q8C926    | 1     | 1   | 52996     | 60347     | 25483     | 88686     | 65383     | 67282     | 78819     | NA        | 26784     | NA          | 0.962766359 |             |             |           |                                                                                           |                                                                                                           |                                                                                         |

|          |           |    |    |           |           |           |           |           |           |           |           |           |            |             |             |           |           |                                                                                  |                                                       |             |             |      |      |
|----------|-----------|----|----|-----------|-----------|-----------|-----------|-----------|-----------|-----------|-----------|-----------|------------|-------------|-------------|-----------|-----------|----------------------------------------------------------------------------------|-------------------------------------------------------|-------------|-------------|------|------|
| PIPT2    | Q8D0U1    | 9  | 9  | 47990.5   | 12733.5   | 7480.93   | 12723.33  | 14735     | 17407.67  | 8602.5    | 24415.33  | 811.33    | 0.97488745 | 0.011045478 | 12489.632   | 12616.9   | Down      | Tight junction protein ZO-2                                                      | OS-Musculus                                           | GN-Tjp2     | Pe-1        | SV-2 |      |
| PHF21    | Q8DAK5    | 12 | 12 | 31116.18  | 35572.73  | 22893.73  | 34076.36  | 29080.91  | 35697.27  | 31372.45  | 31486.18  | 3582.36   | 20033.73   | 0.97492778  | 3048.382    | 30634.398 | Down      | 14 kDa phosphatidylserine phosphatase                                            | OS-Musculus                                           | GN-Pht1     | Pe-2        | SV-1 |      |
| FAA49B   | Q8DA99    | 4  | 4  | 11444.75  | 2157.25   | 7793      | 459.70    | 23496.75  | 30246.5   | 45302.7   | 975254.01 | 11605.1   | 0.97525401 | 0.0108137   | 2403.15     | 2730.15   | Down      | Protein FAA49B                                                                   | OS-Musculus                                           | GN-Faa49B   | Pe-2        | SV-1 |      |
| NFTN     | P97300-3  | 10 | 10 | 97573.8   | 149953.8  | 77078.1   | 28191.5   | 153133.75 | 224758.4  | 23572.8   | 20508     | 128353.2  | 59883.4    | 0.97543508  | 15190.34    | 152005.48 | Down      | Isform 3 of Neutrophin                                                           | OS-Musculus                                           | GN-Ntgn     |             |      |      |
| PM421    | P54277    | 16 | 16 | 166570.12 | 161648.94 | 209123.25 | 126123.69 | 146474.62 | 140170.75 | 141720    | 156625    | 193503    | 124242.1   | 0.97538831  | 16988.12    | 16269.95  | Down      | Stathmin                                                                         | OS-Musculus                                           | GN-Stmn1    | Pe-1        | SV-2 |      |
| CADPS    | Q8D071-4  | 7  | 7  | 17190.17  | 16912.5   | 24031.5   | 39920.33  | 25419.33  | 30927.67  | 35151.5   | 9248.67   | 33551.5   | 13504.33   | 0.9758617   | 24476.734   | 24476.734 | Down      | Isform 4 of Calcium-dependent secretion activator 1                              | OS-Musculus                                           | GN-Cadps    |             |      |      |
| MRP24    | Q8D06     | 10 | 10 | 20511.5   | 30826     | 22578.9   | 26979.4   | 25757.8   | 28795.1   | 26301.6   | 26301.6   | 26301.6   | 26301.6    | 0.9758617   | 24476.734   | 24476.734 | Down      | 39S ribosomal protein L24, mitochondrial                                         | OS-Musculus                                           | GN-Mrp24    | Pe-2        | SV-1 |      |
| CHCHD2   | Q8D010    | 4  | 4  | 151330.25 | 15812.25  | 8881      | 18610.25  | 14774.25  | 17985.5   | 11327.25  | 32270     | 20013.25  | 5984       | 0.9768721   | 17468.15    | 14781.81  | Down      | Collet-coiled-coils-coiled-coil helix domain-containing protein 2, mitochondrial | OS-Musculus                                           | GN-Chchd2   | Pe-2        | SV-1 |      |
| DMO      | P11531    | 3  | 3  | 9602.31   | 11804.33  | 7034      | 25369.33  | 12271.33  | 18454.33  | 14994     | 14833     | 13475     | 4919       | 0.97651523  | 0.010122183 | 13216.264 | 13335.064 | Down                                                                             | Dystrophin                                            | OS-Musculus | GN-Dmd      | Pe-1 | SV-3 |
| Q8CQD0   |           | 1  | 1  | 12385.1   | 131916    | 299526    | 222987    | 131152    | 182183    | 33124     | 350140    | 392083    | 110605     | 0.010299494 | 29522.8     | 29087     | Down      | 39S ribosomal protein L33, mitochondrial                                         | OS-Musculus                                           | GN-Mrp33    | Pe-2        | SV-1 |      |
| AP2A     | P11427    | 6  | 6  | 20636.17  | 36232.83  | 19337     | 79199     | 49271.31  | 56478.67  | 50255.39  | 33795     | 36246.31  | 28633.3    | 0.97672574  | 101011337   | 39679.266 | 49084.364 | Down                                                                             | AP-2 complex subunit alpha 2                          | OS-Musculus | GN-Api2a    | Pe-1 | SV-2 |
| RAP1B    | Q8D09     | 3  | 3  | 56146     | 34565.67  | 90086     | 68036.33  | 56756.67  | 91327.33  | 77120.67  | 5902      | 57399.33  | 27181.33   | 0.97691167  | 71096.394   | 71344     | Down      | Small GTP-binding protein 1                                                      | OS-Musculus                                           | GN-Spact1   | Pe-1        | SV-3 |      |
| RPS24    | P62242    | 25 | 25 | 131629.24 | 130774.16 | 131754.72 | 99477.56  | 128360.44 | 115705.72 | 131360.44 | 11766.44  | 91089.84  | 0.97696856 | 0.01011928  | 124401.22   | 124857.21 | Up        | 40S ribosomal protein S8                                                         | OS-Musculus                                           | GN-Rps8     | Pe-1        | SV-1 |      |
| SOD1     | P08228    | 5  | 5  | 18282.12  | 76914.6   | 72178.2   | 60046.6   | 79851.8   | 88881.8   | 69450     | 57889.6   | 92482.2   | 64298.4    | 0.97697743  | 0.01011667  | 74362.8   | 74600.4   | Down                                                                             | Superoxide dismutase (Cu,Zn)                          | OS-Musculus | GN-Sod1     | Pe-1 | SV-2 |
| PLEC     | Q8D0X51-1 | 86 | 86 | 7447.78   | 13038.59  | 68125.5   | 36149.15  | 17546.94  | 26064.76  | 22839.15  | 10995.39  | 7015.16   | 0.9781531  | 0.00946071  | 16199.002   | 16018.02  | Down      | Isform PLEC-12A of Plectin                                                       | OS-Musculus                                           | GN-Plec     |             |      |      |
| PCOLCE   | Q8D09     | 2  | 2  | 1         | 6892      | 6021      | NA        | 37400     | 6205      | 17473     | NA        | 8063      | NA         | 0.97847953  | 0.009476001 | 13126.25  | 12873.33  | Down                                                                             | Gelsolin                                              | OS-Musculus | GN-Gln1     | Pe-1 | SV-2 |
| CAMKY    | Q3UHL1    | 39 | 39 | 9111.09   | 17026.94  | 5333.48   | 43311.24  | 15994.64  | 26397.89  | 27039.91  | 6035.18   | 13919.91  | NA         | 0.97896934  | 0.009330956 | 15118.478 | 18347.72  | Down                                                                             | CaM kinase-like vesicle-associated protein            | OS-Musculus | GN-Camkv    | Pe-1 | SV-2 |
| RPS19    | Q8D09     | 15 | 15 | 132159.4  | 146146.47 | 128311.47 | 136509.07 | 131054.53 | 124282.6  | 145821.4  | 162256.53 | 174915.27 | 64194.33   | 0.009212064 | 134844.19   | 134294.03 | Down      | 40S ribosomal protein S19                                                        | OS-Musculus                                           | GN-Rps19    | Pe-1        | SV-3 |      |
| SAIR     | Q3YK02    | 2  | 2  | 2383.25   | 22818     | 78872.5   | 18530.5   | 27216     | 20571     | 27641.5   | 33755.5   | 46313.5   | 55264      | 0.979016131 | 0.009210353 | 37453.5   | 37109.1   | Down                                                                             | Scaffold attachment factor B1                         | OS-Musculus | GN-Safb     | Pe-1 | SV-2 |
| RAP1B    | Q8D09     | 3  | 3  | 56146     | 34565.67  | 90086     | 68036.33  | 56756.67  | 91327.33  | 77120.67  | 5902      | 57399.33  | 27181.33   | 0.97912567  | 71096.394   | 71344     | Down      | Isform 2 of Probable ATP-dependent RNA helicase DDX17                            | OS-Musculus                                           | GN-Ddx17    |             |      |      |
| DXK17    | Q5DUE-2   | 3  | 3  | 14660.33  | 10815     | 1330      | 23954     | 17906.33  | 18640     | 12068.27  | 2311      | 23695.33  | NA         | 0.97926215  | 0.009210103 | 13733.132 | 13893.333 | Down                                                                             | Isform 1 of Probable ATP-dependent RNA helicase DDX17 | OS-Musculus | GN-Ddx17    |      |      |
| IGLUN5   | Q8HVS8    | 3  | 3  | 3885      | 4532.33   | 2181.33   | 9797.33   | 4956.67   | 6557      | 7208.33   | 1754.33   | 4951      | NA         | 0.97930749  | 0.009028278 | 5700.532  | 517.665   | Down                                                                             | Isform 1 of CD44 antigen                              | OS-Musculus | GN-Igln5    | Pe-2 | SV-2 |
| TRCD10B  | Q8HNL3    | 3  | 3  | 32022     | 32595.67  | 48137     | 118065.33 | 63781.67  | 69922     | 81085.67  | 48567.67  | 54036.33  | 63725.33   | 0.97930749  | 0.009028278 | 5700.532  | 517.665   | Down                                                                             | TBC1 domain family member 10B                         | OS-Musculus | GN-Trcd10b  | Pe-1 | SV-2 |
| PCOLCE   | Q8D09     | 2  | 2  | 14449.5   | 16591.5   | 11419.5   | 21598.5   | 16110     | 14391     | 16433.5   | 15476     | 15389     | 9001       | 0.980122895 | 0.009723897 | 14239.18  | 14338     | Down                                                                             | Polymerase delta-interacting protein 3                | OS-Musculus | GN-Polp3    | Pe-1 | SV-1 |
| FSCN1    | Q61553    | 50 | 50 | 86012.14  | 91834.22  | 80362.82  | 102865.45 | 95498.22  | 1209996   | 145032.14 | 88660.82  | 101177.65 | 60777.92   | 0.9803731   | 0.008607192 | 91614.77  | 91382.906 | Down                                                                             | Fascin                                                | OS-Musculus | GN-Fscn1    | Pe-1 | SV-4 |
| NFASC    | Q81Q03    | 29 | 29 | 21452.41  | 31137.03  | 24308.9   | 58936.56  | 33031.76  | 46346.59  | 10551.99  | 30297.45  | 33155.59  | 15551.99   | 0.980510281 | 0.008487488 | 33773.33  | 33992.106 | Down                                                                             | Neurofascin                                           | OS-Musculus | GN-Nfasc    | Pe-1 | SV-1 |
| RAP1GAP2 | Q5DUE-2   | 3  | 3  | 14660.33  | 10815     | 1330      | 23954     | 17906.33  | 18640     | 12068.27  | 2311      | 23695.33  | NA         | 0.980542582 | 0.008443314 | 33992.106 | 33992.106 | Down                                                                             | Isform 2 of Rap1 GTPase-activating protein 2          | OS-Musculus | GN-Rap1gap2 |      |      |
| PRPF8    | Q8D078    | 7  | 7  | 84425.5   | 92855.5   | 26188.5   | 61805     | 81153     | 89267     | 86133.5   | 14933.5   | 80071.5   | NA         | 0.98074592  | 0.008443314 | 33992.106 | 33992.106 | Down                                                                             | Isform 2 of Rap1 GTPase-activating protein 2          | OS-Musculus | GN-Rap1gap2 |      |      |
| MRP24    | Q8D06     | 10 | 10 | 20511.5   | 30826     | 22578.9   | 26979.4   | 25757.8   | 28795.1   | 26301.6   | 26301.6   | 26301.6   | 26301.6    | 0.98074592  | 0.008443314 | 33992.106 | 33992.106 | Down                                                                             | Isform 2 of Rap1 GTPase-activating protein 2          | OS-Musculus | GN-Rap1gap2 |      |      |
| MRP24    | Q8D06     | 10 | 10 | 20511.5   | 30826     | 22578.9   | 26979.4   | 25757.8   | 28795.1   | 26301.6   | 26301.6   | 26301.6   | 26301.6    | 0.98074592  | 0.008443314 | 33992.106 | 33992.106 | Down                                                                             | Isform 2 of Rap1 GTPase-activating protein 2          | OS-Musculus | GN-Rap1gap2 |      |      |
| MRP24    | Q8D06     | 10 | 10 | 20511.5   | 30826     | 22578.9   | 26979.4   | 25757.8   | 28795.1   | 26301.6   | 26301.6   | 26301.6   | 26301.6    | 0.98074592  | 0.008443314 | 33992.106 | 33992.106 | Down                                                                             | Isform 2 of Rap1 GTPase-activating protein 2          | OS-Musculus | GN-Rap1gap2 |      |      |
| MRP24    | Q8D06     | 10 | 10 | 20511.5   | 30826     | 22578.9   | 26979.4   | 25757.8   | 28795.1   | 26301.6   | 26301.6   | 26301.6   | 26301.6    | 0.98074592  | 0.008443314 | 33992.106 | 33992.106 | Down                                                                             | Isform 2 of Rap1 GTPase-activating protein 2          | OS-Musculus | GN-Rap1gap2 |      |      |
| MRP24    | Q8D06     | 10 | 10 | 20511.5   | 30826     | 22578.9   | 26979.4   | 25757.8   | 28795.1   | 26301.6   | 26301.6   | 26301.6   | 26301.6    | 0.98074592  | 0.008443314 | 33992.106 | 33992.106 | Down                                                                             | Isform 2 of Rap1 GTPase-activating protein 2          | OS-Musculus | GN-Rap1gap2 |      |      |
| MRP24    | Q8D06     | 10 | 10 | 20511.5   | 30826     | 22578.9   | 26979.4   | 25757.8   | 28795.1   | 26301.6   | 26301.6   | 26301.6   | 26301.6    | 0.98074592  | 0.008443314 | 33992.106 | 33992.106 | Down                                                                             | Isform 2 of Rap1 GTPase-activating protein 2          | OS-Musculus | GN-Rap1gap2 |      |      |
| MRP24    | Q8D06     | 10 | 10 | 20511.5   | 30826     | 22578.9   | 26979.4   | 25757.8   | 28795.1   | 26301.6   | 26301.6   | 26301.6   | 26301.6    | 0.98074592  | 0.008443314 | 33992.106 | 33992.106 | Down                                                                             | Isform 2 of Rap1 GTPase-activating protein 2          | OS-Musculus | GN-Rap1gap2 |      |      |
| MRP24    | Q8D06     | 10 | 10 | 20511.5   | 30826     | 22578.9   | 26979.4   | 25757.8   | 28795.1   | 26301.6   | 26301.6   | 26301.6   | 26301.6    | 0.98074592  | 0.008443314 | 33992.106 | 33992.106 | Down                                                                             | Isform 2 of Rap1 GTPase-activating protein 2          | OS-Musculus | GN-Rap1gap2 |      |      |
| MRP24    | Q8D06     | 10 | 10 | 20511.5   | 30826     | 22578.9   | 26979.4   | 25757.8   | 28795.1   | 26301.6   | 26301.6   | 26301.6   | 26301.6    | 0.98074592  | 0.008443314 | 33992.106 | 33992.106 | Down                                                                             | Isform 2 of Rap1 GTPase-activating protein 2          | OS-Musculus | GN-Rap1gap2 |      |      |
| MRP24    | Q8D06     | 10 | 10 | 20511.5   | 30826     | 22578.9   | 26979.4   | 25757.8   | 28795.1   | 26301.6   | 26301.6   | 26301.6   | 26301.6    | 0.98074592  | 0.008443314 | 33992.106 | 33992.106 | Down                                                                             | Isform 2 of Rap1 GTPase-activating protein 2          | OS-Musculus | GN-Rap1gap2 |      |      |
| MRP24    | Q8D06     | 10 | 10 | 20511.5   | 30826     | 22578.9   | 26979.4   | 25757.8   | 28795.1   | 26301.6   | 26301.6   | 26301.6   | 26301.6    | 0.98074592  | 0.008443314 | 33992.106 | 33992.106 | Down                                                                             | Isform 2 of Rap1 GTPase-activating protein 2          | OS-Musculus | GN-Rap1gap2 |      |      |
| MRP24    | Q8D06     | 10 | 10 | 20511.5   | 30826     | 22578.9   | 26979.4   | 25757.8   | 28795.1   | 26301.6   | 26301.6   | 26301.6   | 26301.6    | 0.98074592  | 0.008443314 | 33992.106 | 33992.106 | Down                                                                             | Isform 2 of Rap1 GTPase-activating protein 2          | OS-Musculus | GN-Rap1gap2 |      |      |
| MRP24    | Q8D06     | 10 | 10 | 20511.5   | 30826     | 22578.9   | 26979.4   | 25757.8   | 28795.1   | 26301.6   | 26301.6   | 26301.6   | 26301.6    | 0.98074592  | 0.008443314 | 33992.106 | 33992.106 | Down                                                                             | Isform 2 of Rap1 GTPase-activating protein 2          | OS-Musculus | GN-Rap1gap2 |      |      |
| MRP24    | Q8D06     | 10 | 10 | 20511.5   | 30826     | 22578.9   | 26979.4   | 25757.8   | 28795.1   | 26301.6   | 26301.6   | 26301.6   | 26301.6    | 0.98074592  | 0.008443314 | 33992.106 | 33992.106 | Down                                                                             | Isform 2 of Rap1 GTPase-activating protein 2          | OS-Musculus | GN-Rap1gap2 |      |      |
| MRP24    | Q8D06     | 10 | 10 | 20511.5   | 30826     | 22578.9   | 26979.4   | 25757.8   | 28795.1   | 26301.6   | 26301.6   | 26301.6   | 26301.6    | 0.98074592  | 0.008443314 | 33992.106 | 33992.106 | Down                                                                             | Isform 2 of Rap1 GTPase-activating protein 2          | OS-Musculus | GN-Rap1gap2 |      |      |
| MRP24    | Q8D06     | 10 | 10 | 20511.5   | 30826     | 22578.9   | 26979.4   | 25757.8   | 28795.1   | 26301.6   | 26301.6   | 26301.6   | 26301.6    | 0.98074592  | 0.008443314 | 33992.106 | 33992.106 | Down                                                                             | Isform 2 of Rap1 GTPase-activating protein 2          | OS-Musculus | GN-Rap1gap2 |      |      |
| MRP24    | Q8D06     | 10 | 10 | 20511.5   | 30826     | 22578.9   | 26979.4   | 25757.8   | 28795.1   | 26301.6   | 26301.6   | 26301.6   | 26301.6    | 0.98074592  | 0.008443314 | 33992.106 | 33992.106 | Down                                                                             | Isform 2 of Rap1 GTPase-activating protein 2          | OS-Musculus | GN-Rap1gap2 |      |      |
| MRP24    | Q8D06     | 10 | 10 | 20511.5   | 30826     | 22578.9   | 26979.4   | 25757.8   | 28795.1   | 26301.6   | 26301.6   | 26301.6   | 26301.6    | 0.98074592  | 0.008443314 | 33992.106 | 33992.106 | Down                                                                             | Isform 2 of Rap1 GTPase-activating protein 2          | OS-Musculus | GN-Rap1gap2 |      |      |
| MRP24    | Q8D06     | 10 | 10 | 20511.5   | 30826     | 22578.9   | 26979.4   | 25757.8   | 28795.1   | 26301.6   | 26301.6   | 26301.6   | 26301.6    | 0.98074592  | 0.008443314 | 33992.106 | 33992.106 | Down                                                                             | Isform 2 of Rap1 GTPase-activating protein 2          | OS-Musculus | GN-Rap1gap  |      |      |
